# Supplementary material for: Single-nucleus RNA sequencing of midbrain blood-brain barrier cells in schizophrenia reveals subtle transcriptional changes with overall preservation of cellular proportions and phenotypes
Source: Mol Psychiatry. 2022 Oct 3;27(11):4731–40. doi: 10.1038/s41380-022-01796-0 (PMC9734060; doi:10.1038/s41380-022-01796-0)
Supplement: Supplementary file 3 — Supplementary Table 3 [file 41380_2022_1796_MOESM3_ESM.xlsx]

## Sheet: Astrocytes
p_val	avg_log2FC	pct.1	pct.2	p_val_adj	cluster	gene
0	3.58857	0.934	0.689	0	Astrocytes	SLC1A2
0	3.54093	0.978	0.76	0	Astrocytes	HPSE2
0	3.03445	0.985	0.6	0	Astrocytes	CADM2
0	3.0113	0.939	0.775	0	Astrocytes	TNC
0	2.8682	0.936	0.588	0	Astrocytes	NRXN1
0	2.68934	0.936	0.613	0	Astrocytes	NKAIN3
0	2.48945	0.965	0.588	0	Astrocytes	ADGRB3
0	2.46229	0.893	0.723	0	Astrocytes	AC002429.2
0	2.34361	0.9	0.631	0	Astrocytes	LRRC4C
0	2.20634	0.884	0.724	0	Astrocytes	SLC6A11
0	2.17808	0.936	0.873	0	Astrocytes	CABLES1
0	2.14829	0.909	0.692	0	Astrocytes	TNR
0	2.03219	0.93	0.755	0	Astrocytes	GABRB1
0	1.93027	0.889	0.551	0	Astrocytes	LUZP2
0	1.88624	0.798	0.583	0	Astrocytes	LINC01094
0	1.88372	0.951	0.769	0	Astrocytes	TTN
0	1.84207	0.94	0.76	0	Astrocytes	RGS6
0	1.83871	0.984	0.703	0	Astrocytes	GPC5
0	1.82377	0.966	0.684	0	Astrocytes	FAM155A
0	1.75778	0.809	0.624	0	Astrocytes	AQP4-AS1
0	1.70444	0.936	0.7	0	Astrocytes	SHISA6
0	1.65305	0.832	0.701	0	Astrocytes	NRXN3
0	1.64824	0.847	0.549	0	Astrocytes	GRID2
0	1.60747	0.822	0.654	0	Astrocytes	BRINP3
0	1.60346	0.778	0.721	0	Astrocytes	AC012593.1
0	1.59817	0.805	0.54	0	Astrocytes	RALYL
0	1.5684	0.921	0.602	0	Astrocytes	KCND2
0	1.40828	0.83	0.712	0	Astrocytes	CALN1
0	1.39608	0.839	0.66	0	Astrocytes	ESRRG
0	1.38941	0.807	0.717	0	Astrocytes	EDNRB
0	1.36503	0.852	0.863	0	Astrocytes	DCLK1
0	1.34894	0.815	0.756	0	Astrocytes	MAOB
0	1.34069	0.71	0.692	0	Astrocytes	ALDH1A1
0	1.31593	0.828	0.657	0	Astrocytes	EGLN3
0	1.31067	0.906	0.805	0	Astrocytes	TENM2
0	1.30886	0.696	0.564	0	Astrocytes	FRMD5
0	1.30161	0.716	0.535	0	Astrocytes	CCDC129
0	1.30156	0.853	0.629	0	Astrocytes	MACROD2
0	1.30068	0.892	0.595	0	Astrocytes	TMEM108
0	1.29593	0.922	0.636	0	Astrocytes	SLC4A4
0	1.25753	0.8	0.636	0	Astrocytes	SPOCK1
0	1.25029	0.988	0.886	0	Astrocytes	SLC1A3
0	1.23769	0.708	0.651	0	Astrocytes	HSPB8
0	1.17881	0.767	0.771	0	Astrocytes	CD44
0	1.16065	0.917	0.706	0	Astrocytes	CA12
0	1.13763	0.973	0.855	0	Astrocytes	CACNA2D3
0	1.1354	0.964	0.801	0	Astrocytes	GLIS3
0	1.12854	0.848	0.738	0	Astrocytes	CTXND1
0	1.11542	0.705	0.474	0	Astrocytes	FSTL5
0	1.09811	0.657	0.548	0	Astrocytes	LINC00836
0	1.09152	0.911	0.658	0	Astrocytes	MEIS2
0	1.0786	0.831	0.74	0	Astrocytes	MARCH3
0	1.04991	0.796	0.597	0	Astrocytes	DLGAP1
0	1.04481	0.777	0.762	0	Astrocytes	MRAS
0	1.02766	0.984	0.865	0	Astrocytes	MIR4300HG
0	1.01822	0.855	0.677	0	Astrocytes	FRMPD4
0	1.01682	0.797	0.502	0	Astrocytes	STXBP5L
0	1.00379	0.912	0.689	0	Astrocytes	DPP10
0	0.989143	0.713	0.532	0	Astrocytes	CADPS
0	0.978052	0.756	0.726	0	Astrocytes	AC091078.1
0	0.963024	0.79	0.721	0	Astrocytes	AC108866.1
0	0.946385	0.762	0.742	0	Astrocytes	AC087564.1
0	0.935556	0.814	0.495	0	Astrocytes	LRRC3B
0	0.929097	0.81	0.597	0	Astrocytes	DCHS2
0	0.925183	0.763	0.65	0	Astrocytes	SHISA9
0	0.916955	0.893	0.689	0	Astrocytes	SDS
0	0.911302	0.824	0.687	0	Astrocytes	CPAMD8
0	0.90817	0.725	0.672	0	Astrocytes	KCNMB2-AS1
0	0.889185	0.977	0.891	0	Astrocytes	LINC01088
0	0.888192	0.718	0.62	0	Astrocytes	AL589740.1
0	0.885672	0.847	0.758	0	Astrocytes	AC019068.1
0	0.867598	0.739	0.585	0	Astrocytes	SEMA3E
5.75698e-231	0.864109	0.597	0.559	1.1514e-227	Astrocytes	AC010099.4
0	0.851676	0.836	0.536	0	Astrocytes	LGR6
0	0.830323	0.732	0.588	0	Astrocytes	TOX
0	0.822097	0.841	0.57	0	Astrocytes	OTX2-AS1
0	0.820789	0.858	0.788	0	Astrocytes	CHST11
2.56525e-06	0.820196	0.57	0.68	0.00513051	Astrocytes	ANGPTL4
0	0.808699	0.939	0.83	0	Astrocytes	SPARCL1
7.33037e-124	0.80104	0.748	0.696	1.46607e-120	Astrocytes	SLC38A1
0	0.797228	0.769	0.652	0	Astrocytes	ME1
0	0.796407	0.973	0.722	0	Astrocytes	DGKB
0	0.795868	0.614	0.461	0	Astrocytes	GPR158
0	0.794003	0.722	0.634	0	Astrocytes	KCNJ16
0	0.77479	0.83	0.725	0	Astrocytes	AC138627.1
0	0.774694	0.707	0.711	0	Astrocytes	AC110023.1
0	0.769094	0.798	0.714	0	Astrocytes	AP002991.1
0	0.766076	0.931	0.702	0	Astrocytes	AL591686.2
0	0.761862	0.816	0.611	0	Astrocytes	PLXNA4
5.93074e-13	0.756671	0.521	0.588	1.18615e-09	Astrocytes	PMP2
0	0.74742	0.597	0.275	0	Astrocytes	NLGN4X
0	0.730152	0.792	0.607	0	Astrocytes	KCNN2
0	0.709777	0.789	0.643	0	Astrocytes	SGCD
0	0.707906	0.99	0.896	0	Astrocytes	LRMDA
0	0.696079	0.78	0.563	0	Astrocytes	NRSN1
0	0.676426	0.713	0.564	0	Astrocytes	BTBD11
0	0.671853	0.753	0.738	0	Astrocytes	ALK
1.69103e-220	0.657477	0.611	0.618	3.38205e-217	Astrocytes	LRAT
0	0.653878	0.754	0.65	0	Astrocytes	AL445426.1
0	0.644241	0.662	0.516	0	Astrocytes	PDK4
0	0.643786	0.778	0.697	0	Astrocytes	DPYSL3
1.8689e-254	0.641765	0.61	0.513	3.73779e-251	Astrocytes	AC115622.1
3.84822e-197	0.637851	0.661	0.719	7.69644e-194	Astrocytes	LINC00499
0	0.628759	0.73	0.591	0	Astrocytes	SLC35F1
8.1385e-91	0.628025	0.579	0.571	1.6277e-87	Astrocytes	TPD52L1
2.47499e-277	0.625912	0.726	0.789	4.94997e-274	Astrocytes	PFKFB2
5.20363e-71	0.610285	0.583	0.518	1.04073e-67	Astrocytes	ID2
0	0.60426	0.721	0.63	0	Astrocytes	FAP
0	0.593949	0.783	0.726	0	Astrocytes	POU6F2
1.22375e-284	0.593325	0.626	0.499	2.44749e-281	Astrocytes	SNAP25
1.49633e-165	0.574555	0.68	0.711	2.99265e-162	Astrocytes	BAG3
0	0.573195	0.811	0.674	0	Astrocytes	ATP10B
1.28565e-88	0.567867	0.498	0.419	2.5713e-85	Astrocytes	CRYAB
0	0.567161	0.843	0.614	0	Astrocytes	SCD
0	0.561773	0.813	0.782	0	Astrocytes	KCNIP1
0	0.554788	0.712	0.539	0	Astrocytes	CHI3L1
4.76483e-185	0.54999	0.663	0.587	9.52966e-182	Astrocytes	DGKI
1.3759e-242	0.543711	0.678	0.575	2.7518e-239	Astrocytes	RETREG1
7.25085e-37	0.540678	0.61	0.688	1.45017e-33	Astrocytes	MT2A
0	0.536721	0.683	0.608	0	Astrocytes	RGS20
1.22096e-113	0.522207	0.708	0.71	2.44193e-110	Astrocytes	ADAMTS9
5.68898e-213	0.513264	0.583	0.505	1.1378e-209	Astrocytes	PPP1R3C
0	0.500499	0.816	0.656	0	Astrocytes	AC025159.1
0	0.497958	0.829	0.731	0	Astrocytes	TMTC2
0	0.495681	0.759	0.628	0	Astrocytes	TENM3
1.63511e-253	0.491789	0.678	0.682	3.27022e-250	Astrocytes	U91319.1
0	0.476174	0.758	0.585	0	Astrocytes	FHOD3
6.93775e-220	0.475403	0.716	0.662	1.38755e-216	Astrocytes	PTPRT
1.98745e-133	0.460284	0.731	0.722	3.97491e-130	Astrocytes	PLOD2
2.34397e-34	0.451975	0.606	0.614	4.68795e-31	Astrocytes	VCAN
0	0.451667	0.685	0.389	0	Astrocytes	AC090809.1
5.2675e-25	0.449853	0.588	0.599	1.0535e-21	Astrocytes	AC006059.1
0	0.448492	0.871	0.73	0	Astrocytes	CYP4F12
2.02787e-245	0.44749	0.659	0.548	4.05574e-242	Astrocytes	GABBR2
7.49182e-196	0.444087	0.894	0.859	1.49836e-192	Astrocytes	KIAA1217
0	0.439343	0.825	0.735	0	Astrocytes	JDP2
0	0.438067	0.71	0.655	0	Astrocytes	POT1-AS1
0	0.436707	0.717	0.703	0	Astrocytes	TMC1
8.71151e-224	0.435716	0.688	0.593	1.7423e-220	Astrocytes	CDH4
3.36526e-22	0.431394	0.574	0.699	6.73053e-19	Astrocytes	AL035078.4
1.23714e-136	0.419331	0.687	0.641	2.47429e-133	Astrocytes	LINC00598
0	0.415261	0.892	0.882	0	Astrocytes	LINC00645
1.92149e-59	0.414717	0.409	0.507	3.84299e-56	Astrocytes	CHST9
8.16625e-240	0.41257	0.674	0.711	1.63325e-236	Astrocytes	ZNF365
2.37629e-81	0.404955	0.647	0.631	4.75258e-78	Astrocytes	DOCK10
0	0.403971	0.662	0.547	0	Astrocytes	APOC1
3.1356e-237	0.40158	0.878	0.852	6.2712e-234	Astrocytes	PTCH1
1.93561e-162	0.400248	0.705	0.762	3.87122e-159	Astrocytes	KIF6
4.85422e-57	0.396829	0.713	0.712	9.70843e-54	Astrocytes	GREB1L
0	0.394373	0.65	0.484	0	Astrocytes	B3GAT2
7.52476e-06	0.389029	0.48	0.516	0.0150495	Astrocytes	TUBA1A
0	0.385709	0.805	0.619	0	Astrocytes	LINC00609
1.31838e-137	0.38352	0.699	0.685	2.63676e-134	Astrocytes	UNC79
1.81386e-185	0.372175	0.664	0.585	3.62773e-182	Astrocytes	PKN2-AS1
0	0.371138	0.635	0.428	0	Astrocytes	HILPDA
0	0.365704	0.709	0.661	0	Astrocytes	CA8
3.86091e-18	0.36362	0.606	0.672	7.72182e-15	Astrocytes	CSMD2
7.66813e-285	0.363503	0.68	0.624	1.53363e-281	Astrocytes	AC007402.1
0	0.360758	0.805	0.657	0	Astrocytes	PRUNE2
1.2559e-151	0.359729	0.649	0.583	2.5118e-148	Astrocytes	KCNJ3
0	0.359447	0.635	0.479	0	Astrocytes	AC008991.1
6.37882e-198	0.35612	0.568	0.454	1.27576e-194	Astrocytes	RIMS1
0	0.355819	0.743	0.726	0	Astrocytes	CRB1
1.9865e-83	0.345844	0.584	0.516	3.973e-80	Astrocytes	GRIP1
1.92898e-159	0.344387	0.763	0.679	3.85796e-156	Astrocytes	EFNA5
3.53198e-160	0.340882	0.576	0.554	7.06395e-157	Astrocytes	MT1M
0	0.337527	0.692	0.625	0	Astrocytes	AP000446.1
0	0.335479	0.691	0.607	0	Astrocytes	FAM196B
2.87889e-207	0.334093	0.928	0.846	5.75778e-204	Astrocytes	CACNB2
1.9933e-200	0.333927	0.797	0.742	3.98661e-197	Astrocytes	AC104123.1
7.99062e-94	0.333602	0.639	0.592	1.59812e-90	Astrocytes	AL359710.1
3.50176e-152	0.332027	0.611	0.535	7.00352e-149	Astrocytes	KSR2
0	0.328026	0.729	0.623	0	Astrocytes	LINC02328
1.65538e-275	0.321699	0.782	0.663	3.31077e-272	Astrocytes	OSGIN2
1.26913e-27	0.318644	0.564	0.61	2.53826e-24	Astrocytes	AC097515.1
1.50492e-74	0.314408	0.6	0.546	3.00984e-71	Astrocytes	GABRB3
1.53292e-29	0.312812	0.505	0.636	3.06584e-26	Astrocytes	AC006148.1
0	0.308417	0.93	0.803	0	Astrocytes	SAMD4A
1.31523e-215	0.302011	0.942	0.905	2.63046e-212	Astrocytes	FRMD4A
6.38852e-102	0.301067	0.54	0.474	1.2777e-98	Astrocytes	MKX
7.57856e-224	0.299337	0.835	0.785	1.51571e-220	Astrocytes	TGFB2
4.13799e-69	0.296122	0.664	0.683	8.27597e-66	Astrocytes	AC113414.1
2.15196e-61	0.289217	0.565	0.505	4.30392e-58	Astrocytes	VAV3
0	0.28904	0.71	0.538	0	Astrocytes	MSMO1
1.43054e-145	0.285935	0.678	0.606	2.86108e-142	Astrocytes	PCLO
0	0.283452	0.698	0.563	0	Astrocytes	AL450332.1
4.72002e-108	0.279101	0.768	0.737	9.44005e-105	Astrocytes	ABI3BP
3.52108e-185	0.274615	0.297	0.377	7.04217e-182	Astrocytes	AC009975.1
0	0.274538	0.704	0.576	0	Astrocytes	ARHGAP22
2.81138e-29	0.272986	0.508	0.688	5.62275e-26	Astrocytes	AL355974.2
0	0.264523	0.724	0.587	0	Astrocytes	AC016766.1
0	0.262813	0.791	0.688	0	Astrocytes	SORCS3
1.57585e-31	0.258406	0.514	0.686	3.1517e-28	Astrocytes	AL365259.1
7.82882e-07	0.258367	0.494	0.507	0.00156576	Astrocytes	GRIA4
3.62742e-68	0.257416	0.438	0.558	7.25483e-65	Astrocytes	RASD1
2.24715e-307	0.255058	0.706	0.577	4.49429e-304	Astrocytes	CASC2
8.61052e-34	0.253072	0.597	0.613	1.7221e-30	Astrocytes	C8orf37-AS1
9.4428e-272	0.250662	0.732	0.593	1.88856e-268	Astrocytes	MAOA

## Sheet: Fibroblasts
p_val	avg_log2FC	pct.1	pct.2	p_val_adj	cluster	gene
0	5.96404	0.985	0.703	0	Fibroblasts	CEMIP
0	4.68977	0.989	0.618	0	Fibroblasts	LAMA2
0	3.67461	0.981	0.75	0	Fibroblasts	BICC1
0	3.64882	0.968	0.496	0	Fibroblasts	SVIL
0	3.62383	0.94	0.628	0	Fibroblasts	ABCA9
0	3.59657	0.923	0.696	0	Fibroblasts	AKAP12
0	3.53818	0.949	0.476	0	Fibroblasts	TMEM132C
0	3.09658	0.951	0.773	0	Fibroblasts	AC092957.1
0	2.95212	0.96	0.763	0	Fibroblasts	CRISPLD2
0	2.90707	0.918	0.488	0	Fibroblasts	KCNK2
0	2.87876	0.906	0.853	0	Fibroblasts	RNF220
0	2.85424	0.899	0.634	0	Fibroblasts	COL18A1
0	2.81876	0.853	0.692	0	Fibroblasts	ATP1B3
0	2.76452	0.965	0.809	0	Fibroblasts	UACA
0	2.72059	0.922	0.798	0	Fibroblasts	COL6A3
0	2.71918	0.876	0.653	0	Fibroblasts	ABCA8
0	2.70786	0.969	0.779	0	Fibroblasts	GRK5
0	2.66179	0.941	0.683	0	Fibroblasts	ARHGAP29
0	2.62797	0.946	0.801	0	Fibroblasts	TPM1
0	2.59998	0.941	0.701	0	Fibroblasts	KCNT2
0	2.58803	0.819	0.447	0	Fibroblasts	ABCA10
0	2.55983	0.925	0.516	0	Fibroblasts	COL15A1
0	2.51071	0.929	0.562	0	Fibroblasts	LAMB1
0	2.47972	0.78	0.375	0	Fibroblasts	MDGA2
0	2.39857	0.935	0.605	0	Fibroblasts	NID1
0	2.33032	0.926	0.611	0	Fibroblasts	ARHGAP10
0	2.32086	0.854	0.516	0	Fibroblasts	ITGA8
0	2.31307	0.883	0.46	0	Fibroblasts	DCN
0	2.3114	0.864	0.47	0	Fibroblasts	PLD1
0	2.30862	0.882	0.726	0	Fibroblasts	SLC16A12
0	2.30207	0.9	0.626	0	Fibroblasts	COL4A1
0	2.29908	0.915	0.596	0	Fibroblasts	FHL2
0	2.28323	0.93	0.673	0	Fibroblasts	RBMS3
0	2.27682	0.902	0.678	0	Fibroblasts	AC026316.5
0	2.26205	0.882	0.611	0	Fibroblasts	PRICKLE1
0	2.25928	0.951	0.858	0	Fibroblasts	TGFBR3
0	2.24957	0.896	0.691	0	Fibroblasts	SLC6A13
0	2.21617	0.825	0.693	0	Fibroblasts	FLVCR2
0	2.20379	0.943	0.812	0	Fibroblasts	SH3D19
0	2.20213	0.897	0.586	0	Fibroblasts	LINC01482
0	2.19876	0.912	0.686	0	Fibroblasts	PPFIBP1
0	2.18687	0.931	0.7	0	Fibroblasts	ADGRD1
0	2.1703	0.774	0.618	0	Fibroblasts	FGF13
0	2.1601	0.92	0.655	0	Fibroblasts	ESYT2
0	2.15946	0.873	0.586	0	Fibroblasts	EPB41L3
0	2.12213	0.826	0.484	0	Fibroblasts	EBF2
0	2.12128	0.89	0.738	0	Fibroblasts	AL445250.1
0	2.11413	0.93	0.653	0	Fibroblasts	PDE7A
0	2.10937	0.888	0.618	0	Fibroblasts	MAMDC2
0	2.09135	0.831	0.469	0	Fibroblasts	APOD
0	2.07607	0.898	0.661	0	Fibroblasts	LAMC3
0	2.07172	0.915	0.793	0	Fibroblasts	DISC1
0	2.06906	0.876	0.642	0	Fibroblasts	TGFBR2
0	2.05452	0.828	0.435	0	Fibroblasts	COL1A2
0	2.02052	0.887	0.637	0	Fibroblasts	SEMA5A
0	2.01001	0.898	0.79	0	Fibroblasts	FBLN1
0	1.99884	0.855	0.63	0	Fibroblasts	ADAM12
0	1.98949	0.925	0.764	0	Fibroblasts	CREB3L2
0	1.98861	0.918	0.615	0	Fibroblasts	COL4A2
0	1.98344	0.866	0.839	0	Fibroblasts	STK24
0	1.98151	0.945	0.84	0	Fibroblasts	EBF1
0	1.9708	0.919	0.739	0	Fibroblasts	PLA2R1
0	1.95644	0.869	0.817	0	Fibroblasts	SLC6A20
0	1.94459	0.905	0.649	0	Fibroblasts	MTSS1
0	1.93643	0.875	0.702	0	Fibroblasts	CPED1
0	1.9275	0.794	0.597	0	Fibroblasts	CFH
0	1.9088	0.857	0.607	0	Fibroblasts	LPAR1
0	1.90817	0.848	0.566	0	Fibroblasts	NHS
0	1.90426	0.895	0.829	0	Fibroblasts	SLC22A23
0	1.88539	0.926	0.71	0	Fibroblasts	MYOF
0	1.88261	0.956	0.812	0	Fibroblasts	ZEB1
0	1.88193	0.96	0.838	0	Fibroblasts	TACC1
0	1.85619	0.805	0.423	0	Fibroblasts	ABCA6
5.20667e-205	1.85583	0.68	0.477	1.04133e-201	Fibroblasts	NRG1
0	1.84713	0.812	0.653	0	Fibroblasts	NGF
0	1.84512	0.889	0.753	0	Fibroblasts	TNXB
0	1.84161	0.933	0.771	0	Fibroblasts	GMDS
0	1.83122	0.753	0.667	0	Fibroblasts	BMP5
0	1.8266	0.956	0.898	0	Fibroblasts	PRKAG2
0	1.82615	0.743	0.537	0	Fibroblasts	LINC02147
0	1.81006	0.853	0.567	0	Fibroblasts	ELMO1
0	1.79516	0.945	0.879	0	Fibroblasts	EPS8
0	1.78886	0.817	0.817	0	Fibroblasts	TNFRSF19
0	1.78493	0.942	0.78	0	Fibroblasts	ADAMTS9-AS2
0	1.77956	0.936	0.642	0	Fibroblasts	PLCB4
0	1.77549	0.85	0.644	0	Fibroblasts	AFF3
0	1.76572	0.978	0.935	0	Fibroblasts	KAZN
0	1.7654	0.911	0.665	0	Fibroblasts	ST6GALNAC3
0	1.75165	0.863	0.53	0	Fibroblasts	COL11A1
0	1.74341	0.782	0.576	0	Fibroblasts	NLGN1
0	1.74071	0.876	0.631	0	Fibroblasts	PHLDB2
0	1.72946	0.901	0.65	0	Fibroblasts	RASAL2
0	1.72526	0.893	0.798	0	Fibroblasts	ANKH
0	1.72366	0.92	0.795	0	Fibroblasts	COL5A1
0	1.71896	0.836	0.745	0	Fibroblasts	ZIC1
0	1.71838	0.812	0.656	0	Fibroblasts	NHSL2
0	1.69548	0.943	0.849	0	Fibroblasts	CALD1
0	1.69362	0.937	0.857	0	Fibroblasts	NR2F2-AS1
0	1.68753	0.865	0.616	0	Fibroblasts	RBMS1
0	1.6802	0.883	0.63	0	Fibroblasts	SH3BP5
0	1.67573	0.923	0.678	0	Fibroblasts	ADAMTS17
0	1.66308	0.922	0.693	0	Fibroblasts	F3
0	1.66151	0.889	0.626	0	Fibroblasts	GNAL
0	1.65875	0.774	0.777	0	Fibroblasts	TBX18
0	1.62061	0.804	0.508	0	Fibroblasts	EPHA7
0	1.61859	0.954	0.884	0	Fibroblasts	LINC00854
0	1.60776	0.898	0.726	0	Fibroblasts	ZNF331
0	1.60707	0.894	0.815	0	Fibroblasts	LHFPL2
0	1.60612	0.758	0.574	0	Fibroblasts	ALDH1A2
0	1.59529	0.927	0.747	0	Fibroblasts	CRIM1
0	1.59404	0.756	0.58	0	Fibroblasts	BMP6
0	1.58653	0.915	0.703	0	Fibroblasts	MAN2A1
0	1.58557	0.783	0.592	0	Fibroblasts	PDE1A
0	1.57764	0.946	0.709	0	Fibroblasts	GLUL
0	1.57557	0.962	0.934	0	Fibroblasts	COLEC12
0	1.56901	0.88	0.574	0	Fibroblasts	FAM20A
0	1.56047	0.922	0.587	0	Fibroblasts	FN1
0	1.55187	0.915	0.585	0	Fibroblasts	PKP4
0	1.55101	0.776	0.639	0	Fibroblasts	COL3A1
0	1.52482	0.806	0.477	0	Fibroblasts	C7
0	1.52102	0.811	0.438	0	Fibroblasts	RAPGEF4
0	1.50882	0.941	0.907	0	Fibroblasts	FLRT2
0	1.50327	0.854	0.633	0	Fibroblasts	KLHL29
0	1.50205	0.799	0.639	0	Fibroblasts	PPM1H
0	1.50162	0.802	0.512	0	Fibroblasts	AC098617.1
0	1.49918	0.914	0.763	0	Fibroblasts	BACH2
0	1.49787	0.834	0.734	0	Fibroblasts	CLMP
0	1.47868	0.825	0.645	0	Fibroblasts	ARHGAP28
0	1.47607	0.876	0.68	0	Fibroblasts	MIR4435-2HG
0	1.47056	0.722	0.511	0	Fibroblasts	EPHA3
0	1.46492	0.875	0.671	0	Fibroblasts	PKP2
0	1.46343	0.835	0.672	0	Fibroblasts	ITGA10
0	1.46286	0.916	0.688	0	Fibroblasts	ITGA11
0	1.45964	0.766	0.63	0	Fibroblasts	DCDC2C
0	1.45627	0.867	0.708	0	Fibroblasts	SLC24A3
0	1.4413	0.841	0.533	0	Fibroblasts	CNTN4
0	1.43965	0.781	0.579	0	Fibroblasts	SLC2A3
0	1.42124	0.771	0.591	0	Fibroblasts	CENPP
0	1.41091	0.87	0.653	0	Fibroblasts	PGAP1
0	1.40159	0.85	0.694	0	Fibroblasts	NKD1
0	1.39601	0.864	0.577	0	Fibroblasts	GAS7
0	1.39382	0.839	0.553	0	Fibroblasts	MEG3
0	1.39249	0.845	0.527	0	Fibroblasts	KHDRBS3
0	1.39144	0.837	0.729	0	Fibroblasts	RALGPS2
0	1.37393	0.909	0.661	0	Fibroblasts	SCARA5
0	1.37102	0.885	0.725	0	Fibroblasts	RASGRF2
0	1.35308	0.879	0.53	0	Fibroblasts	SPRY4-AS1
0	1.35141	0.827	0.586	0	Fibroblasts	AC093772.1
8.95745e-213	1.3437	0.835	0.749	1.79149e-209	Fibroblasts	USP53
5.56396e-237	1.34186	0.725	0.66	1.11279e-233	Fibroblasts	ITIH5
0	1.31562	0.809	0.791	0	Fibroblasts	NID2
0	1.31172	0.883	0.552	0	Fibroblasts	LTBP2
9.12746e-166	1.31094	0.635	0.534	1.82549e-162	Fibroblasts	AC092958.1
0	1.29995	0.858	0.756	0	Fibroblasts	TRABD2B
0	1.29961	0.832	0.725	0	Fibroblasts	JAG1
0	1.29719	0.855	0.749	0	Fibroblasts	PKNOX2
6.06893e-296	1.2929	0.933	0.938	1.21379e-292	Fibroblasts	PDZRN3
5.12015e-300	1.29147	0.894	0.801	1.02403e-296	Fibroblasts	RBPMS
0	1.28024	0.864	0.726	0	Fibroblasts	THSD4
0	1.26922	0.761	0.75	0	Fibroblasts	WDR86
9.41294e-247	1.26496	0.661	0.492	1.88259e-243	Fibroblasts	PDLIM1
0	1.2555	0.815	0.613	0	Fibroblasts	PROS1
0	1.25445	0.882	0.777	0	Fibroblasts	COL1A1
0	1.25334	0.89	0.769	0	Fibroblasts	JAM3
0	1.25217	0.797	0.697	0	Fibroblasts	MYO1B
0	1.24517	0.756	0.438	0	Fibroblasts	THSD7B
3.30493e-168	1.23975	0.714	0.615	6.60987e-165	Fibroblasts	LAMC1
0	1.22011	0.803	0.512	0	Fibroblasts	SEMA3C
0	1.19855	0.87	0.753	0	Fibroblasts	KIRREL1
0	1.19815	0.749	0.542	0	Fibroblasts	HECW1
0	1.19637	0.887	0.578	0	Fibroblasts	FRMD4B
1.2455e-282	1.18588	0.799	0.625	2.491e-279	Fibroblasts	SETBP1
0	1.17942	0.828	0.584	0	Fibroblasts	AL139383.1
0	1.1761	0.777	0.736	0	Fibroblasts	CYP1B1
4.07065e-77	1.17093	0.841	0.833	8.1413e-74	Fibroblasts	SLC7A11
0	1.17067	0.851	0.699	0	Fibroblasts	SLC6A12
6.12502e-218	1.1676	0.906	0.882	1.225e-214	Fibroblasts	DLG2
0	1.16683	0.868	0.637	0	Fibroblasts	MLPH
0	1.16638	0.719	0.519	0	Fibroblasts	PDE1C
0	1.1644	0.768	0.549	0	Fibroblasts	UAP1
1.236e-135	1.16398	0.672	0.649	2.472e-132	Fibroblasts	ADAMTS12
9.85729e-191	1.15721	0.666	0.582	1.97146e-187	Fibroblasts	CYP1B1-AS1
0	1.15666	0.741	0.412	0	Fibroblasts	COL12A1
0	1.15271	0.843	0.545	0	Fibroblasts	FBLN5
0	1.14228	0.806	0.576	0	Fibroblasts	FBLN2
0	1.14136	0.796	0.643	0	Fibroblasts	VIT
1.62798e-128	1.13378	0.891	0.871	3.25596e-125	Fibroblasts	ADAMTSL3
0	1.12094	0.726	0.615	0	Fibroblasts	AC012409.2
3.74376e-132	1.11839	0.789	0.735	7.48753e-129	Fibroblasts	STK39
0	1.1135	0.869	0.723	0	Fibroblasts	KCNQ1OT1
1.08735e-123	1.11002	0.795	0.735	2.1747e-120	Fibroblasts	PID1
0	1.10922	0.837	0.555	0	Fibroblasts	ITGA9
2.0393e-251	1.10492	0.895	0.693	4.0786e-248	Fibroblasts	BNC2
3.50182e-236	1.09858	0.754	0.618	7.00364e-233	Fibroblasts	FOXP2
1.6317e-242	1.09189	0.698	0.458	3.2634e-239	Fibroblasts	AC007319.1
6.84483e-217	1.09167	0.738	0.579	1.36897e-213	Fibroblasts	CREM
2.21516e-141	1.09042	0.862	0.792	4.43033e-138	Fibroblasts	SNED1
0	1.08882	0.737	0.496	0	Fibroblasts	ARHGAP20
0	1.08108	0.939	0.744	0	Fibroblasts	APBB2
0	1.08028	0.836	0.693	0	Fibroblasts	SYNE2
1.43251e-292	1.07892	0.92	0.781	2.86502e-289	Fibroblasts	PTPRM
0	1.07497	0.751	0.497	0	Fibroblasts	DNAH14
0	1.07124	0.84	0.581	0	Fibroblasts	TMOD1
0	1.07114	0.795	0.693	0	Fibroblasts	FMO2
7.89154e-276	1.06621	0.698	0.651	1.57831e-272	Fibroblasts	TFPI
0	1.05795	0.77	0.493	0	Fibroblasts	AC046195.1
0	1.05409	0.904	0.587	0	Fibroblasts	UBASH3B
2.354e-304	1.05367	0.911	0.75	4.708e-301	Fibroblasts	AC008014.1
0	1.05192	0.825	0.523	0	Fibroblasts	LINC00607
0	1.04214	0.832	0.729	0	Fibroblasts	COL6A2
1.15375e-300	1.03827	0.815	0.667	2.30749e-297	Fibroblasts	CASC15
0	1.03654	0.826	0.702	0	Fibroblasts	CEBPD
2.92564e-97	1.03176	0.663	0.772	5.85129e-94	Fibroblasts	ROR2
2.68038e-256	1.02499	0.729	0.564	5.36076e-253	Fibroblasts	PLAGL1
0	1.02488	0.799	0.594	0	Fibroblasts	RND3
0	1.02386	0.795	0.632	0	Fibroblasts	ENPP6
0	1.02312	0.786	0.561	0	Fibroblasts	SLC7A2
1.73649e-138	1.02255	0.746	0.569	3.47299e-135	Fibroblasts	ROBO1
1.04152e-251	0.999364	0.957	0.944	2.08304e-248	Fibroblasts	FOXP1
0	0.997839	0.812	0.662	0	Fibroblasts	SLC14A2-AS1
0	0.992326	0.844	0.589	0	Fibroblasts	AC027288.3
0	0.990664	0.78	0.509	0	Fibroblasts	SLC13A4
9.6429e-232	0.983809	0.731	0.657	1.92858e-228	Fibroblasts	COL5A2
1.06109e-305	0.983485	0.774	0.652	2.12217e-302	Fibroblasts	PRMT9
0	0.981025	0.761	0.563	0	Fibroblasts	COL4A4
1.75372e-187	0.974934	0.617	0.38	3.50744e-184	Fibroblasts	MEG8
3.24835e-154	0.974587	0.688	0.637	6.49671e-151	Fibroblasts	ARHGAP6
1.79713e-71	0.967533	0.675	0.596	3.59425e-68	Fibroblasts	KCNQ3
0	0.957255	0.823	0.76	0	Fibroblasts	ERRFI1
4.78216e-226	0.950453	0.872	0.72	9.56431e-223	Fibroblasts	LINC00894
0	0.947255	0.85	0.475	0	Fibroblasts	RUNX2
3.03514e-174	0.946086	0.616	0.365	6.07028e-171	Fibroblasts	COL13A1
3.03325e-208	0.945413	0.872	0.74	6.06649e-205	Fibroblasts	SYNPO2
0	0.945335	0.847	0.56	0	Fibroblasts	COL4A3
1.48853e-38	0.942173	0.547	0.451	2.97706e-35	Fibroblasts	EMCN
2.86419e-192	0.938057	0.687	0.608	5.72839e-189	Fibroblasts	SP100
0	0.937976	0.806	0.513	0	Fibroblasts	GPC3
0	0.93572	0.866	0.705	0	Fibroblasts	ANKRD33B
4.16351e-258	0.935102	0.694	0.718	8.32701e-255	Fibroblasts	LINC01197
9.17382e-160	0.929796	0.733	0.706	1.83476e-156	Fibroblasts	ABTB2
3.09574e-243	0.914831	0.695	0.658	6.19147e-240	Fibroblasts	LINC02112
0	0.909708	0.764	0.632	0	Fibroblasts	RARB
8.14963e-80	0.906954	0.641	0.765	1.62993e-76	Fibroblasts	AC092155.1
0	0.904795	0.873	0.499	0	Fibroblasts	UNC5C
1.95325e-37	0.903816	0.837	0.796	3.9065e-34	Fibroblasts	ELL2
1.97187e-159	0.896479	0.693	0.634	3.94374e-156	Fibroblasts	NR4A2
4.26775e-276	0.894381	0.707	0.549	8.5355e-273	Fibroblasts	ADAMTS1
0	0.893349	0.815	0.699	0	Fibroblasts	VIM
2.23114e-200	0.880792	0.684	0.461	4.46229e-197	Fibroblasts	SLC12A2
5.80238e-260	0.879549	0.692	0.721	1.16048e-256	Fibroblasts	TP63
7.99633e-120	0.878735	0.645	0.529	1.59927e-116	Fibroblasts	GULP1
5.94083e-117	0.876232	0.938	0.907	1.18817e-113	Fibroblasts	IMMP2L
6.28335e-222	0.875946	0.787	0.726	1.25667e-218	Fibroblasts	HLF
2.73646e-169	0.867473	0.654	0.534	5.47292e-166	Fibroblasts	MSC-AS1
8.55417e-33	0.863042	0.673	0.656	1.71083e-29	Fibroblasts	GPC6
0	0.859727	0.788	0.493	0	Fibroblasts	HCN1
1.33428e-95	0.858326	0.71	0.723	2.66855e-92	Fibroblasts	NR4A1
1.68585e-63	0.850693	0.774	0.746	3.37169e-60	Fibroblasts	PTN
8.8375e-170	0.846378	0.845	0.75	1.7675e-166	Fibroblasts	VCL
0	0.845988	0.736	0.483	0	Fibroblasts	CXCL12
0	0.844854	0.777	0.671	0	Fibroblasts	FOSL2
0	0.844716	0.806	0.72	0	Fibroblasts	IRAK3
0	0.840333	0.746	0.734	0	Fibroblasts	PRELP
0	0.837285	0.843	0.668	0	Fibroblasts	COBLL1
0	0.837253	0.835	0.39	0	Fibroblasts	DSP
0	0.832837	0.867	0.515	0	Fibroblasts	UNC5D
0	0.831195	0.829	0.62	0	Fibroblasts	HSPG2
0	0.829909	0.835	0.59	0	Fibroblasts	YBX3
0	0.827191	0.817	0.546	0	Fibroblasts	ADAMTS15
0	0.817497	0.845	0.71	0	Fibroblasts	IGFBP4
0	0.816042	0.797	0.714	0	Fibroblasts	IL1R1
1.92615e-84	0.811856	0.625	0.495	3.8523e-81	Fibroblasts	NCOA7
0	0.811665	0.868	0.791	0	Fibroblasts	NXN
0	0.809574	0.771	0.577	0	Fibroblasts	EFNB2
0	0.80896	0.819	0.669	0	Fibroblasts	CREB5
0	0.79858	0.861	0.662	0	Fibroblasts	LEF1
0	0.797315	0.788	0.587	0	Fibroblasts	MAN1A1
0	0.796477	0.854	0.556	0	Fibroblasts	ACTN4
2.295e-139	0.795907	0.886	0.814	4.59e-136	Fibroblasts	WWTR1
0	0.793402	0.77	0.497	0	Fibroblasts	FAM189A1
6.70706e-150	0.78761	0.679	0.559	1.34141e-146	Fibroblasts	TUSC3
1.70371e-45	0.779785	0.657	0.585	3.40741e-42	Fibroblasts	LRFN5
2.34045e-176	0.778527	0.623	0.379	4.6809e-173	Fibroblasts	IQGAP2
0	0.771227	0.868	0.506	0	Fibroblasts	TWIST2
0	0.76771	0.762	0.587	0	Fibroblasts	AC079298.3
6.50916e-100	0.767386	0.865	0.78	1.30183e-96	Fibroblasts	GHR
4.62771e-94	0.766758	0.858	0.797	9.25542e-91	Fibroblasts	MIR646HG
7.0028e-301	0.763882	0.864	0.73	1.40056e-297	Fibroblasts	EVA1C
0	0.759926	0.896	0.717	0	Fibroblasts	OSBPL10
9.89233e-68	0.754628	0.584	0.439	1.97847e-64	Fibroblasts	CHSY3
0	0.753932	0.773	0.567	0	Fibroblasts	SLC4A7
0	0.753624	0.831	0.419	0	Fibroblasts	FGD5
1.44718e-57	0.736313	0.603	0.578	2.89436e-54	Fibroblasts	PRKCB
1.59992e-145	0.734472	0.865	0.829	3.19984e-142	Fibroblasts	MAN1C1
2.35043e-77	0.734098	0.675	0.565	4.70085e-74	Fibroblasts	THBS2
4.09762e-86	0.729168	0.618	0.628	8.19524e-83	Fibroblasts	ISM1
9.67577e-219	0.728878	0.665	0.52	1.93515e-215	Fibroblasts	SLC5A5
2.10266e-158	0.728252	0.699	0.586	4.20532e-155	Fibroblasts	ADGRL2
1.44257e-34	0.727943	0.669	0.611	2.88513e-31	Fibroblasts	AC073050.1
4.43157e-24	0.722308	0.591	0.577	8.86314e-21	Fibroblasts	SLC38A2
0	0.719046	0.845	0.649	0	Fibroblasts	KCNE4
0	0.718255	0.877	0.565	0	Fibroblasts	ASPN
0	0.717711	0.836	0.56	0	Fibroblasts	DCDC2
1.14666e-267	0.712541	0.915	0.791	2.29332e-264	Fibroblasts	PTPRG
0	0.709406	0.847	0.614	0	Fibroblasts	REPS2
2.00566e-303	0.706271	0.779	0.596	4.01132e-300	Fibroblasts	KLHL13
4.5498e-88	0.703688	0.639	0.544	9.09959e-85	Fibroblasts	ZNF385D
0	0.703586	0.781	0.601	0	Fibroblasts	CYR61
2.75237e-87	0.699975	0.606	0.75	5.50475e-84	Fibroblasts	LINC00924
0	0.69883	0.865	0.756	0	Fibroblasts	FBXO32
0	0.688764	0.835	0.743	0	Fibroblasts	APOLD1
0	0.687905	0.798	0.735	0	Fibroblasts	AP000943.3
0	0.685942	0.853	0.797	0	Fibroblasts	LINC02511
0	0.685454	0.778	0.504	0	Fibroblasts	ANO3
2.44784e-68	0.684277	0.694	0.612	4.89568e-65	Fibroblasts	BACH1
0	0.68362	0.789	0.376	0	Fibroblasts	SVEP1
0	0.678767	0.835	0.714	0	Fibroblasts	ITGA1
0	0.677865	0.86	0.546	0	Fibroblasts	KANK4
9.9036e-288	0.675209	0.724	0.504	1.98072e-284	Fibroblasts	AK5
1.04507e-241	0.670282	0.772	0.612	2.09014e-238	Fibroblasts	SCARB1
0	0.662565	0.754	0.633	0	Fibroblasts	SH3KBP1
2.40089e-172	0.659791	0.624	0.486	4.80178e-169	Fibroblasts	THBS1
2.82088e-98	0.659622	0.89	0.741	5.64176e-95	Fibroblasts	PDE3A
0	0.653808	0.823	0.565	0	Fibroblasts	DSCAML1
2.14818e-128	0.651663	0.7	0.473	4.29636e-125	Fibroblasts	MMP16
1.13184e-91	0.645233	0.823	0.775	2.26369e-88	Fibroblasts	NOS1AP
5.67722e-41	0.643521	0.682	0.67	1.13544e-37	Fibroblasts	ATRNL1
0	0.642062	0.76	0.445	0	Fibroblasts	NECAB1
8.28582e-157	0.641874	0.743	0.606	1.65716e-153	Fibroblasts	SDK1
7.52446e-146	0.638397	0.715	0.624	1.50489e-142	Fibroblasts	PAK3
2.63957e-301	0.621416	0.724	0.57	5.27913e-298	Fibroblasts	SCN7A
3.48515e-23	0.621008	0.648	0.659	6.97029e-20	Fibroblasts	ITGBL1
1.5119e-87	0.612475	0.654	0.607	3.02379e-84	Fibroblasts	SRGAP2
0	0.603912	0.853	0.64	0	Fibroblasts	DLC1
1.35343e-121	0.603744	0.83	0.694	2.70686e-118	Fibroblasts	AF279873.3
3.3763e-240	0.591971	0.71	0.487	6.75259e-237	Fibroblasts	RUNX1
1.24499e-36	0.590754	0.566	0.588	2.48998e-33	Fibroblasts	PTGIS
0	0.58597	0.774	0.751	0	Fibroblasts	KCNK17
1.04283e-206	0.585634	0.78	0.751	2.08565e-203	Fibroblasts	ARHGEF28
8.52518e-232	0.583429	0.754	0.534	1.70504e-228	Fibroblasts	LRCH1
1.36397e-193	0.582861	0.776	0.621	2.72794e-190	Fibroblasts	ST3GAL6
2.39776e-56	0.580815	0.621	0.57	4.79552e-53	Fibroblasts	AC011287.1
1.42574e-158	0.579957	0.645	0.711	2.85147e-155	Fibroblasts	OGN
1.11365e-25	0.576044	0.831	0.844	2.22729e-22	Fibroblasts	SLC20A2
1.67011e-149	0.570541	0.636	0.656	3.34023e-146	Fibroblasts	PTGFR
0	0.569986	0.841	0.609	0	Fibroblasts	SLC22A3
1.24584e-177	0.569922	0.839	0.755	2.49167e-174	Fibroblasts	CHSY1
1.97414e-140	0.569644	0.652	0.444	3.94828e-137	Fibroblasts	LEPR
1.11756e-119	0.569585	0.623	0.589	2.23512e-116	Fibroblasts	FOXC1
0	0.566569	0.857	0.558	0	Fibroblasts	AC090531.1
2.01519e-44	0.565982	0.566	0.612	4.03037e-41	Fibroblasts	AC002074.1
6.69744e-56	0.565433	0.837	0.831	1.33949e-52	Fibroblasts	PTEN
4.72418e-09	0.560108	0.492	0.718	9.44836e-06	Fibroblasts	PRKG2
5.8594e-29	0.558179	0.568	0.531	1.17188e-25	Fibroblasts	GLCE
7.49555e-84	0.557829	0.656	0.605	1.49911e-80	Fibroblasts	CP
0	0.557733	0.86	0.573	0	Fibroblasts	CYTOR
0	0.55652	0.703	0.36	0	Fibroblasts	CMKLR1
4.65231e-58	0.554919	0.868	0.832	9.30462e-55	Fibroblasts	BBS9
9.71825e-33	0.552498	0.833	0.923	1.94365e-29	Fibroblasts	SSBP3
0	0.549524	0.698	0.538	0	Fibroblasts	ITIH2
4.24256e-128	0.548963	0.656	0.617	8.48512e-125	Fibroblasts	ANGPT2
1.00229e-150	0.548342	0.682	0.619	2.00457e-147	Fibroblasts	PIEZO2
2.0167e-19	0.544432	0.626	0.647	4.0334e-16	Fibroblasts	PLXNC1
0	0.54414	0.893	0.902	0	Fibroblasts	SLC16A6
7.52829e-08	0.543376	0.651	0.677	0.000150566	Fibroblasts	PPP1CB
1.94732e-236	0.537753	0.679	0.706	3.89463e-233	Fibroblasts	CLIC6
3.09203e-08	0.532265	0.953	0.958	6.18407e-05	Fibroblasts	LHFPL6
0	0.531193	0.806	0.653	0	Fibroblasts	HSD11B1
0	0.526852	0.835	0.567	0	Fibroblasts	RNF152
0	0.524562	0.826	0.455	0	Fibroblasts	EDN3
2.54432e-236	0.524512	0.685	0.574	5.08864e-233	Fibroblasts	ZNF536
1.36677e-183	0.523998	0.624	0.402	2.73355e-180	Fibroblasts	KDR
0	0.51541	0.752	0.586	0	Fibroblasts	TPRG1
1.12086e-117	0.514785	0.76	0.606	2.24172e-114	Fibroblasts	OXR1
1.42001e-151	0.510366	0.751	0.682	2.84001e-148	Fibroblasts	ACTN1
0	0.509974	0.723	0.418	0	Fibroblasts	AL050403.2
1.1177e-169	0.506846	0.647	0.511	2.2354e-166	Fibroblasts	AL356258.1
2.35011e-124	0.504939	0.786	0.7	4.70023e-121	Fibroblasts	PARP14
2.2016e-219	0.501818	0.799	0.583	4.40319e-216	Fibroblasts	ANGPT1
9.43867e-212	0.498486	0.774	0.587	1.88773e-208	Fibroblasts	DOCK9
0	0.497059	0.766	0.704	0	Fibroblasts	JCAD
6.33965e-233	0.489025	0.878	0.762	1.26793e-229	Fibroblasts	PLCL1
1.63716e-255	0.488883	0.703	0.608	3.27433e-252	Fibroblasts	PLXDC1
0	0.488655	0.886	0.737	0	Fibroblasts	CLEC1A
3.99476e-47	0.485934	0.927	0.911	7.98953e-44	Fibroblasts	ZFHX3
0	0.484949	0.767	0.537	0	Fibroblasts	RAPGEF5
7.85497e-35	0.482824	0.664	0.608	1.57099e-31	Fibroblasts	DIAPH2
1.05967e-152	0.482408	0.823	0.863	2.11935e-149	Fibroblasts	NDRG1
4.87334e-52	0.480559	0.735	0.661	9.74668e-49	Fibroblasts	AC098829.1
2.3915e-11	0.475429	0.503	0.457	4.78301e-08	Fibroblasts	LRRTM3
3.99615e-87	0.472429	0.839	0.715	7.9923e-84	Fibroblasts	CMSS1
3.54373e-57	0.468497	0.682	0.603	7.08747e-54	Fibroblasts	CACNA1D
1.36231e-47	0.467221	0.671	0.673	2.72462e-44	Fibroblasts	SYNDIG1
0	0.467185	0.815	0.659	0	Fibroblasts	IL16
7.14057e-77	0.465736	0.737	0.665	1.42811e-73	Fibroblasts	CTNNB1
7.97675e-234	0.46555	0.719	0.586	1.59535e-230	Fibroblasts	IL34
0	0.462418	0.732	0.62	0	Fibroblasts	TWIST1
1.70616e-13	0.46166	0.66	0.75	3.41231e-10	Fibroblasts	TPM4
1.74991e-266	0.461344	0.807	0.708	3.49981e-263	Fibroblasts	KLF6
6.22482e-128	0.461054	0.798	0.661	1.24496e-124	Fibroblasts	ADIPOR2
0	0.460996	0.847	0.626	0	Fibroblasts	SLCO2B1
3.16591e-53	0.460311	0.846	0.758	6.33182e-50	Fibroblasts	MGAT5
1.25898e-83	0.453361	0.644	0.575	2.51796e-80	Fibroblasts	RCAN2
1.40741e-98	0.452642	0.649	0.592	2.81482e-95	Fibroblasts	CTNNAL1
1.86326e-28	0.451215	0.73	0.73	3.72652e-25	Fibroblasts	DLEU2
1.8204e-11	0.448608	0.65	0.685	3.64081e-08	Fibroblasts	PRELID2
6.8536e-221	0.446404	0.772	0.62	1.37072e-217	Fibroblasts	RANBP17
1.00862e-135	0.444562	0.679	0.696	2.01723e-132	Fibroblasts	IL18
3.89961e-135	0.442675	0.609	0.471	7.79922e-132	Fibroblasts	PHLDA1
0	0.441687	0.841	0.528	0	Fibroblasts	KCNS3
2.97373e-49	0.440218	0.586	0.57	5.94745e-46	Fibroblasts	COL14A1
2.36077e-11	0.439898	0.584	0.613	4.72155e-08	Fibroblasts	NR4A3
0	0.439856	0.781	0.796	0	Fibroblasts	KANK3
9.48127e-200	0.43662	0.749	0.615	1.89625e-196	Fibroblasts	CLSTN2
3.68178e-61	0.435942	0.616	0.726	7.36356e-58	Fibroblasts	ANXA1
0	0.431143	0.766	0.495	0	Fibroblasts	FRZB
0	0.429574	0.678	0.358	0	Fibroblasts	MEDAG
0	0.42897	0.705	0.401	0	Fibroblasts	FGF10
0	0.426168	0.769	0.426	0	Fibroblasts	VIPR2
0	0.424893	0.843	0.591	0	Fibroblasts	OSMR
0	0.423223	0.78	0.634	0	Fibroblasts	LINC00922
1.94671e-17	0.422845	0.674	0.668	3.89342e-14	Fibroblasts	ABCA13
1.01572e-65	0.421647	0.678	0.606	2.03144e-62	Fibroblasts	PAPPA
2.35209e-124	0.421055	0.714	0.646	4.70419e-121	Fibroblasts	TXNIP
7.10012e-93	0.415311	0.671	0.603	1.42002e-89	Fibroblasts	BACE2
0	0.414576	0.693	0.434	0	Fibroblasts	LRRK1
0	0.413914	0.755	0.584	0	Fibroblasts	ENG
6.15199e-304	0.413842	0.805	0.718	1.2304e-300	Fibroblasts	NUAK1
0	0.413757	0.783	0.429	0	Fibroblasts	PRDM6
3.00837e-11	0.412091	0.55	0.522	6.01673e-08	Fibroblasts	DGKH
1.00407e-220	0.40904	0.778	0.593	2.00815e-217	Fibroblasts	COL23A1
2.18201e-180	0.401295	0.746	0.581	4.36403e-177	Fibroblasts	AC104389.4
0	0.397637	0.846	0.681	0	Fibroblasts	SPTLC3
6.88964e-19	0.397635	0.575	0.485	1.37793e-15	Fibroblasts	SYT1
9.22787e-11	0.39722	0.459	0.552	1.84557e-07	Fibroblasts	ACSM3
2.0022e-166	0.396615	0.611	0.37	4.0044e-163	Fibroblasts	ISLR
1.83753e-36	0.396106	0.632	0.628	3.67505e-33	Fibroblasts	HERPUD1
4.02099e-182	0.393646	0.784	0.662	8.04199e-179	Fibroblasts	CYTH3
9.41412e-217	0.392476	0.708	0.539	1.88282e-213	Fibroblasts	PALD1
1.97556e-234	0.390922	0.808	0.67	3.95111e-231	Fibroblasts	CCDC148
9.33621e-305	0.390409	0.7	0.578	1.86724e-301	Fibroblasts	ALDH1A3
0	0.390177	0.746	0.501	0	Fibroblasts	ASS1
0	0.389514	0.702	0.376	0	Fibroblasts	EDIL3
7.58435e-36	0.38926	0.885	0.849	1.51687e-32	Fibroblasts	CCNY
0	0.388149	0.868	0.569	0	Fibroblasts	DOCK8
2.70278e-62	0.384251	0.697	0.703	5.40555e-59	Fibroblasts	AGPAT4
7.675e-07	0.383654	0.564	0.587	0.001535	Fibroblasts	SLC2A13
4.98082e-61	0.38103	0.587	0.724	9.96164e-58	Fibroblasts	ADH1B
3.46708e-29	0.379738	0.625	0.52	6.93417e-26	Fibroblasts	KCNIP4
3.59674e-168	0.378971	0.692	0.559	7.19349e-165	Fibroblasts	CUBN
3.3117e-10	0.378714	0.65	0.761	6.6234e-07	Fibroblasts	COL4A6
1.48869e-216	0.378703	0.708	0.489	2.97738e-213	Fibroblasts	CALCRL
4.95482e-35	0.378479	0.569	0.501	9.90964e-32	Fibroblasts	Z96074.1
8.43812e-17	0.374909	0.951	0.935	1.68762e-13	Fibroblasts	FRMD4A
1.14493e-171	0.374064	0.738	0.776	2.28986e-168	Fibroblasts	FAM129A
0	0.373312	0.805	0.501	0	Fibroblasts	TMEM71
0	0.372972	0.857	0.714	0	Fibroblasts	WNT9A
6.42799e-30	0.372715	0.425	0.57	1.2856e-26	Fibroblasts	MGP
3.13589e-131	0.367954	0.599	0.318	6.27179e-128	Fibroblasts	IGFBP6
0	0.367591	0.802	0.709	0	Fibroblasts	VCAM1
3.61979e-179	0.36724	0.724	0.617	7.23959e-176	Fibroblasts	FAR2
0	0.364474	0.883	0.776	0	Fibroblasts	ACVR1
4.58999e-74	0.363979	0.603	0.437	9.17998e-71	Fibroblasts	CCSER1
0	0.363279	0.775	0.622	0	Fibroblasts	SRGAP2B
2.02655e-123	0.359006	0.683	0.585	4.05309e-120	Fibroblasts	MBP
0	0.356092	0.797	0.771	0	Fibroblasts	TBX15
2.31195e-58	0.354882	0.836	0.767	4.6239e-55	Fibroblasts	XYLT1
4.80533e-67	0.349632	0.747	0.724	9.61065e-64	Fibroblasts	FBXL2
0	0.349554	0.705	0.54	0	Fibroblasts	MYL9
0	0.345705	0.894	0.542	0	Fibroblasts	ACTA2
3.10229e-44	0.345694	0.629	0.538	6.20457e-41	Fibroblasts	ZEB1-AS1
0	0.344598	0.878	0.659	0	Fibroblasts	F13A1
1.19834e-87	0.342938	0.699	0.607	2.39668e-84	Fibroblasts	AL662796.1
4.41059e-151	0.34199	0.759	0.595	8.82118e-148	Fibroblasts	TENT5A
5.97015e-59	0.341079	0.361	0.413	1.19403e-55	Fibroblasts	AC104041.1
0	0.340619	0.849	0.422	0	Fibroblasts	POU2AF1
1.1774e-30	0.339893	0.665	0.684	2.35481e-27	Fibroblasts	PCBP3
0	0.334934	0.803	0.592	0	Fibroblasts	SLIT3
4.46352e-67	0.334903	0.798	0.667	8.92703e-64	Fibroblasts	COL28A1
0	0.333905	0.715	0.555	0	Fibroblasts	AL138881.1
2.26356e-109	0.331201	0.635	0.566	4.52712e-106	Fibroblasts	NDST4
2.12192e-252	0.33037	0.84	0.699	4.24384e-249	Fibroblasts	XAF1
4.74057e-59	0.329079	0.772	0.646	9.48114e-56	Fibroblasts	KIAA0825
1.12885e-111	0.326451	0.698	0.687	2.2577e-108	Fibroblasts	ANO2
5.80455e-278	0.325442	0.717	0.581	1.16091e-274	Fibroblasts	AC021504.1
0	0.323673	0.74	0.471	0	Fibroblasts	PGR
8.41492e-08	0.323516	0.707	0.728	0.000168298	Fibroblasts	ROR1
2.95047e-27	0.320808	0.899	0.802	5.90093e-24	Fibroblasts	KCNIP1
0	0.316647	0.818	0.543	0	Fibroblasts	CFAP69
0	0.316392	0.843	0.587	0	Fibroblasts	ABCA4
1.39075e-135	0.314297	0.665	0.656	2.78151e-132	Fibroblasts	IL15
1.09561e-27	0.311943	0.731	0.684	2.19122e-24	Fibroblasts	SLCO1A2
3.1409e-219	0.31179	0.798	0.725	6.2818e-216	Fibroblasts	GLIS1
9.37171e-292	0.3107	0.737	0.67	1.87434e-288	Fibroblasts	PLA2G4A
8.42468e-40	0.310566	0.642	0.603	1.68494e-36	Fibroblasts	PIP5K1B
4.53005e-18	0.310549	0.498	0.596	9.0601e-15	Fibroblasts	L3MBTL4
0	0.310516	0.729	0.732	0	Fibroblasts	AL512638.2
3.53559e-16	0.310004	0.644	0.607	7.07119e-13	Fibroblasts	ARHGAP24
2.71988e-49	0.309904	0.642	0.636	5.43976e-46	Fibroblasts	AC246817.1
2.23685e-38	0.308352	0.624	0.589	4.47371e-35	Fibroblasts	GABARAPL1
0	0.304647	0.81	0.658	0	Fibroblasts	GNG2
2.07611e-22	0.304358	0.408	0.388	4.15222e-19	Fibroblasts	PDE5A
0	0.304288	0.907	0.624	0	Fibroblasts	MEOX2
0	0.300894	0.734	0.435	0	Fibroblasts	SV2B
3.21498e-100	0.298795	0.765	0.593	6.42996e-97	Fibroblasts	RSPO2
2.15123e-17	0.297249	0.693	0.708	4.30245e-14	Fibroblasts	NRP1
0	0.297237	0.87	0.592	0	Fibroblasts	CAVIN2
1.22079e-31	0.295976	0.538	0.414	2.44158e-28	Fibroblasts	GALNTL6
1.35582e-19	0.294503	0.813	0.74	2.71164e-16	Fibroblasts	TPST1
1.01465e-09	0.29307	0.531	0.476	2.0293e-06	Fibroblasts	ANK3
7.91948e-50	0.292822	0.649	0.558	1.5839e-46	Fibroblasts	FAM19A2
9.14864e-196	0.291614	0.883	0.805	1.82973e-192	Fibroblasts	AC138123.1
0	0.291148	0.856	0.511	0	Fibroblasts	AGMO
7.89398e-246	0.288384	0.685	0.573	1.5788e-242	Fibroblasts	CASP4
5.61518e-205	0.287398	0.743	0.598	1.12304e-201	Fibroblasts	RASSF3
3.63876e-162	0.285497	0.762	0.686	7.27752e-159	Fibroblasts	NOX4
0	0.281555	0.726	0.47	0	Fibroblasts	HECW2
1.55453e-52	0.28126	0.596	0.466	3.10906e-49	Fibroblasts	GRM7
7.77284e-72	0.277299	0.638	0.683	1.55457e-68	Fibroblasts	MCTP2
1.82314e-234	0.273275	0.749	0.683	3.64629e-231	Fibroblasts	RNF43
1.77453e-111	0.27313	0.788	0.6	3.54906e-108	Fibroblasts	ELOVL5
2.73629e-107	0.271759	0.66	0.523	5.47258e-104	Fibroblasts	ATP8A2
6.76192e-261	0.270374	0.685	0.43	1.35238e-257	Fibroblasts	CD55
1.83684e-27	0.2701	0.607	0.661	3.67368e-24	Fibroblasts	LYN
0	0.268212	0.863	0.658	0	Fibroblasts	TNFRSF21
7.25429e-60	0.267011	0.721	0.798	1.45086e-56	Fibroblasts	SLC19A1
2.27153e-10	0.266151	0.485	0.378	4.54306e-07	Fibroblasts	FAT4
3.02442e-61	0.264964	0.631	0.633	6.04883e-58	Fibroblasts	STARD8
0	0.263659	0.838	0.572	0	Fibroblasts	MUSK
5.603e-11	0.263369	0.699	0.762	1.1206e-07	Fibroblasts	AL445472.1
1.70194e-51	0.26145	0.514	0.357	3.40388e-48	Fibroblasts	LINGO2
0	0.25986	0.881	0.589	0	Fibroblasts	CLDN1
1.47892e-18	0.259439	0.432	0.411	2.95784e-15	Fibroblasts	CTGF
3.77398e-240	0.258728	0.687	0.612	7.54795e-237	Fibroblasts	CARMN
1.19574e-229	0.258604	0.659	0.395	2.39149e-226	Fibroblasts	SLC16A7
0	0.258416	0.825	0.439	0	Fibroblasts	GATA6
0	0.257148	0.748	0.477	0	Fibroblasts	SHROOM4
2.50394e-291	0.255844	0.697	0.691	5.00789e-288	Fibroblasts	MXRA5
0	0.254944	0.72	0.453	0	Fibroblasts	TRPC3
0	0.253067	0.863	0.698	0	Fibroblasts	EPB41L4A
1.18785e-186	0.252135	0.825	0.758	2.3757e-183	Fibroblasts	IFI44L
6.50616e-06	0.251674	0.919	0.945	0.0130123	Fibroblasts	IGF1R

## Sheet: Endothelial
p_val	avg_log2FC	pct.1	pct.2	p_val_adj	cluster	gene
0	5.49489	0.992	0.668	0	Endothelial	ATP10A
0	5.00391	0.967	0.666	0	Endothelial	ABCB1
0	4.72279	0.985	0.519	0	Endothelial	MECOM
0	4.69442	0.98	0.695	0	Endothelial	FLT1
0	4.39133	0.98	0.711	0	Endothelial	VWF
0	4.33459	0.976	0.724	0	Endothelial	THSD4
0	4.32449	0.93	0.603	0	Endothelial	ARL15
0	4.20584	0.994	0.675	0	Endothelial	MYRIP
0	4.16978	0.97	0.685	0	Endothelial	ELOVL7
0	4.1241	0.99	0.667	0	Endothelial	ST6GALNAC3
0	4.01452	0.98	0.665	0	Endothelial	PTPRB
0	3.99611	0.957	0.579	0	Endothelial	FLI1
0	3.96276	0.988	0.76	0	Endothelial	EPAS1
0	3.8244	0.986	0.582	0	Endothelial	DOCK9
0	3.71972	0.967	0.6	0	Endothelial	PRKCH
0	3.59048	0.899	0.675	0	Endothelial	SLC7A5
0	3.55108	0.978	0.568	0	Endothelial	SAMD12
0	3.48678	0.991	0.79	0	Endothelial	PTPRG
0	3.41416	0.952	0.677	0	Endothelial	ANO2
0	3.27332	0.941	0.347	0	Endothelial	ST8SIA6
0	3.15222	0.974	0.832	0	Endothelial	SORBS2
0	3.13502	0.914	0.664	0	Endothelial	LEF1
0	3.10271	0.947	0.599	0	Endothelial	CLDN5
0	3.10139	0.959	0.84	0	Endothelial	GPCPD1
0	3.05841	0.929	0.582	0	Endothelial	TBC1D4
0	3.02755	0.926	0.579	0	Endothelial	ABCG2
0	3.02201	0.89	0.539	0	Endothelial	SLC39A10
0	2.98473	0.941	0.561	0	Endothelial	SLC1A1
0	2.91065	0.93	0.668	0	Endothelial	COBLL1
0	2.88821	0.941	0.619	0	Endothelial	GRB10
0	2.88249	0.922	0.69	0	Endothelial	PPFIBP1
1.04908e-230	2.87712	0.738	0.654	2.09816e-227	Endothelial	PELI1
0	2.86698	0.978	0.688	0	Endothelial	ST6GAL1
0	2.84723	0.931	0.533	0	Endothelial	PDE10A
0	2.79575	0.95	0.725	0	Endothelial	RASGRF2
0	2.78569	0.994	0.895	0	Endothelial	HERC2
0	2.76366	0.976	0.782	0	Endothelial	PTPRM
0	2.7572	0.925	0.609	0	Endothelial	PODXL
8.67465e-269	2.75468	0.922	0.825	1.73493e-265	Endothelial	PLPP1
0	2.74215	0.913	0.616	0	Endothelial	ERG
0	2.68496	0.905	0.555	0	Endothelial	DNM3
0	2.66909	0.892	0.536	0	Endothelial	A2M
0	2.65362	0.956	0.789	0	Endothelial	NXN
0	2.61341	0.972	0.658	0	Endothelial	ESYT2
0	2.60847	0.939	0.754	0	Endothelial	SLC2A1
0	2.60123	0.949	0.709	0	Endothelial	IL1R1
0	2.58221	0.99	0.839	0	Endothelial	TACC1
0	2.57377	0.956	0.697	0	Endothelial	EPB41L4A
0	2.55947	0.937	0.695	0	Endothelial	MKL2
0	2.54875	0.892	0.603	0	Endothelial	ADGRF5
0	2.5429	0.964	0.727	0	Endothelial	RAPGEF2
0	2.53283	0.902	0.504	0	Endothelial	RNF144B
0	2.52107	0.955	0.483	0	Endothelial	C22orf34
0	2.51961	0.937	0.641	0	Endothelial	LAMA3
0	2.51813	0.967	0.714	0	Endothelial	NUAK1
0	2.50026	0.898	0.546	0	Endothelial	IL4R
0	2.49226	0.865	0.612	0	Endothelial	SLC7A1
0	2.47305	0.977	0.696	0	Endothelial	XAF1
0	2.46109	0.905	0.533	0	Endothelial	BTNL9
0	2.45193	0.992	0.942	0	Endothelial	IGF1R
0	2.41488	0.885	0.53	0	Endothelial	NEDD9
0	2.41116	0.898	0.544	0	Endothelial	B2M
0	2.40915	0.907	0.661	0	Endothelial	MCF2L
0	2.39104	0.926	0.505	0	Endothelial	TEK
0	2.36865	0.964	0.422	0	Endothelial	FGD5
0	2.36708	0.973	0.846	0	Endothelial	CCNY
0	2.35106	0.922	0.859	0	Endothelial	NDRG1
0	2.3508	0.973	0.646	0	Endothelial	PLCB4
0	2.33364	0.89	0.752	0	Endothelial	CRIM1
0	2.29806	0.846	0.535	0	Endothelial	ZNF385B
0	2.27885	0.917	0.546	0	Endothelial	ETS2
0	2.26984	0.917	0.57	0	Endothelial	ELMO1
0	2.26677	0.948	0.75	0	Endothelial	TSPAN9
0	2.24565	0.958	0.748	0	Endothelial	APBB2
0	2.24239	0.917	0.531	0	Endothelial	PTMA
0	2.22541	0.866	0.716	0	Endothelial	NR4A1
0	2.22207	0.907	0.447	0	Endothelial	EGFL7
0	2.22117	0.939	0.581	0	Endothelial	LIMS2
0	2.21388	0.935	0.692	0	Endothelial	SYNE2
0	2.21031	0.89	0.714	0	Endothelial	ITGA1
0	2.20139	0.91	0.622	0	Endothelial	DENND3
0	2.1807	0.905	0.442	0	Endothelial	RAPGEF4
0	2.17994	0.873	0.438	0	Endothelial	PGM5
0	2.1465	0.943	0.594	0	Endothelial	BACE2
0	2.13648	0.953	0.658	0	Endothelial	CTNNB1
0	2.13162	0.808	0.632	0	Endothelial	SLCO2B1
0	2.12832	0.914	0.551	0	Endothelial	EXOC6
0	2.12354	0.877	0.719	0	Endothelial	IRAK3
0	2.11183	0.893	0.66	0	Endothelial	ADIPOR2
0	2.1017	0.98	0.753	0	Endothelial	IFI44L
0	2.09634	0.924	0.673	0	Endothelial	RHOBTB1
0	2.09133	0.882	0.583	0	Endothelial	ENG
0	2.08697	0.878	0.762	0	Endothelial	STXBP6
0	2.08176	0.875	0.539	0	Endothelial	AC019197.1
0	2.08069	0.937	0.437	0	Endothelial	LEPR
0	2.07001	0.924	0.727	0	Endothelial	SHANK3
0	2.06786	0.933	0.6	0	Endothelial	SP100
0	2.04542	0.955	0.82	0	Endothelial	MEF2A
0	2.04484	0.897	0.533	0	Endothelial	LRCH1
0	2.04378	0.933	0.646	0	Endothelial	MYH9
0	2.04193	0.97	0.707	0	Endothelial	GALNT15
0	2.03829	0.916	0.777	0	Endothelial	ACVR1
0	2.0177	0.746	0.395	0	Endothelial	SPOCK3
0	2.00098	0.929	0.66	0	Endothelial	HLA-E
0	1.9966	0.817	0.619	0	Endothelial	CEMIP2
0	1.9946	0.835	0.576	0	Endothelial	ITGA6
0	1.9896	0.876	0.599	0	Endothelial	SRGAP2
0	1.98506	0.873	0.571	0	Endothelial	INPP5D
0	1.98491	0.806	0.553	0	Endothelial	ADGRL4
0	1.98387	0.917	0.579	0	Endothelial	CNOT6L
1.14329e-282	1.97786	0.736	0.52	2.28658e-279	Endothelial	SERPINE1
0	1.96773	0.784	0.443	0	Endothelial	EMCN
0	1.96483	0.904	0.678	0	Endothelial	NAMPT
0	1.95822	0.865	0.701	0	Endothelial	JCAD
0	1.95725	0.934	0.608	0	Endothelial	ATP8B1
0	1.95614	0.9	0.464	0	Endothelial	ARID5A
0	1.93915	0.785	0.6	0	Endothelial	PECAM1
0	1.92576	0.918	0.742	0	Endothelial	SAT1
0	1.91908	0.938	0.84	0	Endothelial	ANKS1A
0	1.90604	0.917	0.782	0	Endothelial	FLNB
0	1.90405	0.951	0.608	0	Endothelial	SCARB1
0	1.89025	0.937	0.653	0	Endothelial	MTSS1
0	1.8854	0.826	0.71	0	Endothelial	SMAD6
0	1.88429	0.93	0.531	0	Endothelial	ICA1
0	1.88063	0.926	0.672	0	Endothelial	TIE1
0	1.88	0.888	0.699	0	Endothelial	NRP1
0	1.87913	0.925	0.373	0	Endothelial	AFAP1L2
0	1.87903	0.788	0.584	0	Endothelial	ADGRL2
0	1.86341	0.879	0.593	0	Endothelial	PKP4
0	1.86278	0.97	0.742	0	Endothelial	ADGRG6
0	1.85197	0.86	0.535	0	Endothelial	TGM2
0	1.85005	0.897	0.546	0	Endothelial	HIF1A-AS2
0	1.84584	0.958	0.694	0	Endothelial	PARP14
0	1.84176	0.905	0.689	0	Endothelial	ARHGAP29
0	1.83872	0.828	0.379	0	Endothelial	ZNF366
0	1.83381	0.915	0.782	0	Endothelial	PAPSS2
0	1.83307	0.78	0.462	0	Endothelial	DUSP5
0	1.83277	0.892	0.826	0	Endothelial	RAPGEF1
0	1.82564	0.809	0.582	0	Endothelial	SLC2A3
0	1.82244	0.836	0.444	0	Endothelial	HSPA5
0	1.81637	0.916	0.651	0	Endothelial	EPSTI1
0	1.80635	0.895	0.646	0	Endothelial	TGFBR2
0	1.80381	0.91	0.799	0	Endothelial	STOX2
0	1.80366	0.971	0.792	0	Endothelial	CLIC4
0	1.80252	0.858	0.619	0	Endothelial	HERPUD1
0	1.7978	0.915	0.666	0	Endothelial	PPP1CB
0	1.79587	0.866	0.391	0	Endothelial	SRGN
0	1.79489	0.85	0.636	0	Endothelial	LMBR1
0	1.78206	0.957	0.773	0	Endothelial	GMDS
0	1.78141	0.861	0.842	0	Endothelial	HEG1
0	1.77992	0.931	0.73	0	Endothelial	EVA1C
0	1.75846	0.764	0.67	0	Endothelial	PLA2G4A
0	1.75102	0.783	0.721	0	Endothelial	NOSTRIN
0	1.74996	0.975	0.685	0	Endothelial	PKHD1L1
0	1.7419	0.762	0.44	0	Endothelial	PALMD
0	1.72924	0.743	0.659	0	Endothelial	CXorf36
0	1.71784	0.823	0.539	0	Endothelial	RAPGEF5
0	1.69986	0.894	0.62	0	Endothelial	SLC39A8
0	1.69938	0.822	0.479	0	Endothelial	SHROOM4
0	1.68542	0.878	0.632	0	Endothelial	PARVB
0	1.67626	0.877	0.488	0	Endothelial	TMEM132C
9.47479e-305	1.67537	0.726	0.468	1.89496e-301	Endothelial	RUNDC3B
0	1.67317	0.791	0.783	0	Endothelial	HMCN1
0	1.66835	0.902	0.755	0	Endothelial	CHSY1
0	1.65995	0.899	0.55	0	Endothelial	RPS6KA3
0	1.64497	0.754	0.565	0	Endothelial	MCTP1
2.84568e-266	1.64398	0.715	0.62	5.69136e-263	Endothelial	CYYR1
0	1.63781	0.825	0.56	0	Endothelial	CDYL2
0	1.62761	0.975	0.944	0	Endothelial	FOXP1
0	1.6223	0.87	0.656	0	Endothelial	RASAL2
0	1.6093	0.864	0.596	0	Endothelial	FN1
1.60014e-211	1.60784	0.689	0.547	3.20029e-208	Endothelial	CMTM8
0	1.59756	0.976	0.789	0	Endothelial	SNED1
0	1.59598	0.911	0.652	0	Endothelial	TSC22D1
7.83454e-236	1.59111	0.959	0.877	1.56691e-232	Endothelial	PDE4D
4.9801e-300	1.58748	0.799	0.603	9.96021e-297	Endothelial	AGFG1
5.92098e-290	1.58482	0.878	0.707	1.1842e-286	Endothelial	CADPS2
0	1.57121	0.817	0.618	0	Endothelial	KLF2
0	1.56826	0.877	0.646	0	Endothelial	XKR6
0	1.55703	0.854	0.533	0	Endothelial	NET1
0	1.5472	0.871	0.382	0	Endothelial	PAQR5
0	1.54498	0.949	0.72	0	Endothelial	MAML3
0	1.54074	0.861	0.559	0	Endothelial	SLC19A3
1.47001e-303	1.53985	0.926	0.814	2.94002e-300	Endothelial	WWTR1
3.68664e-185	1.53537	0.674	0.515	7.37329e-182	Endothelial	SGPP2
0	1.53489	0.862	0.604	0	Endothelial	ERO1A
0	1.53191	0.912	0.641	0	Endothelial	EEF1A1
0	1.52564	0.814	0.723	0	Endothelial	B4GALT1
0	1.51548	0.918	0.535	0	Endothelial	DDX60L
0	1.49603	0.814	0.568	0	Endothelial	NOTCH4
0	1.49423	0.926	0.722	0	Endothelial	DLEU2
0	1.48821	0.872	0.679	0	Endothelial	ACTN1
6.34006e-225	1.48304	0.793	0.65	1.26801e-221	Endothelial	AFF3
0	1.48218	0.896	0.338	0	Endothelial	ITM2A
0	1.47911	0.827	0.46	0	Endothelial	SLC12A2
0	1.47859	0.815	0.511	0	Endothelial	EPHA3
0	1.46573	0.876	0.597	0	Endothelial	CFH
0	1.46157	0.822	0.597	0	Endothelial	MEF2C
7.69784e-275	1.45832	0.904	0.798	1.53957e-271	Endothelial	MYO1E
1.07667e-172	1.45147	0.715	0.676	2.15334e-169	Endothelial	FOSL2
0	1.43902	0.789	0.575	0	Endothelial	EPHA4
0	1.43777	0.761	0.627	0	Endothelial	PLAT
0	1.43541	0.811	0.345	0	Endothelial	CLIC5
0	1.42775	0.85	0.597	0	Endothelial	RASSF3
4.27113e-286	1.42287	0.877	0.652	8.54225e-283	Endothelial	LDB2
0	1.40761	0.847	0.52	0	Endothelial	HLA-B
2.87147e-245	1.40185	0.835	0.68	5.74294e-242	Endothelial	SLCO3A1
0	1.39251	0.799	0.63	0	Endothelial	PPP1R16B
0	1.38976	0.954	0.576	0	Endothelial	GABARAPL1
0	1.38779	0.876	0.442	0	Endothelial	DKK2
5.99045e-239	1.38594	0.83	0.747	1.19809e-235	Endothelial	STOM
0	1.37799	0.795	0.57	0	Endothelial	SNTG2
0	1.36534	0.854	0.562	0	Endothelial	ACTN4
0	1.36379	0.821	0.579	0	Endothelial	EFNB2
1.3351e-282	1.36293	0.786	0.71	2.67021e-279	Endothelial	ETS1
0	1.36052	0.913	0.715	0	Endothelial	MYOF
0	1.35933	0.902	0.723	0	Endothelial	HLF
6.42371e-123	1.34782	0.666	0.587	1.28474e-119	Endothelial	BMP6
0	1.34735	0.825	0.707	0	Endothelial	NFKBIA
0	1.34303	0.85	0.794	0	Endothelial	ACER2
0	1.32877	0.91	0.775	0	Endothelial	ENTPD1
0	1.31838	0.972	0.814	0	Endothelial	ZEB1
2.08712e-279	1.31467	0.737	0.464	4.17425e-276	Endothelial	DUSP1
0	1.3119	0.804	0.505	0	Endothelial	SLC38A5
0	1.2984	0.848	0.788	0	Endothelial	GRK5
7.36676e-295	1.29401	0.809	0.598	1.47335e-291	Endothelial	OSMR
0	1.29141	0.934	0.653	0	Endothelial	ITIH5
0	1.2833	0.959	0.524	0	Endothelial	LINC00607
0	1.27983	0.784	0.601	0	Endothelial	CAVIN2
8.60502e-197	1.2775	0.771	0.6	1.721e-193	Endothelial	MSN
0	1.27444	0.812	0.624	0	Endothelial	SRGAP2B
0	1.27338	0.824	0.527	0	Endothelial	IFI27
0	1.26902	0.92	0.786	0	Endothelial	SLC45A4
1.16126e-251	1.26004	0.715	0.52	2.32252e-248	Endothelial	MFSD2A
1.80015e-243	1.25168	0.784	0.711	3.6003e-240	Endothelial	KLF6
8.26936e-231	1.24996	0.738	0.558	1.65387e-227	Endothelial	TMCC3
0	1.24341	0.921	0.629	0	Endothelial	AL359220.1
0	1.24198	0.869	0.74	0	Endothelial	TPM4
0	1.23985	0.817	0.75	0	Endothelial	ARHGEF28
0	1.23781	0.808	0.723	0	Endothelial	CD34
0	1.23213	0.884	0.571	0	Endothelial	ATP1A1
0	1.22489	0.792	0.462	0	Endothelial	ID1
3.23053e-305	1.2197	0.819	0.59	6.46105e-302	Endothelial	MAN1A1
0	1.21863	0.778	0.369	0	Endothelial	FAT4
0	1.21775	0.893	0.613	0	Endothelial	KIAA1324L
1.56923e-236	1.21601	0.698	0.542	3.13847e-233	Endothelial	GRASP
0	1.20681	0.905	0.486	0	Endothelial	NCOA7
0	1.20449	0.849	0.744	0	Endothelial	APOLD1
0	1.1976	0.851	0.793	0	Endothelial	KANK3
8.16219e-136	1.19126	0.657	0.632	1.63244e-132	Endothelial	TRPM6
0	1.18927	0.847	0.642	0	Endothelial	SLC16A14
0	1.18922	0.788	0.538	0	Endothelial	GPR85
0	1.18857	0.812	0.551	0	Endothelial	CDK6
3.1964e-278	1.1868	0.821	0.647	6.3928e-275	Endothelial	NCALD
2.47891e-205	1.18579	0.823	0.681	4.95782e-202	Endothelial	SLCO1A2
4.39611e-213	1.17997	0.725	0.516	8.79222e-210	Endothelial	DGKH
3.82341e-114	1.17871	0.682	0.609	7.64683e-111	Endothelial	TFRC
0	1.17503	0.894	0.782	0	Endothelial	RPGR
0	1.17386	0.802	0.622	0	Endothelial	FENDRR
9.92226e-271	1.17365	0.832	0.595	1.98445e-267	Endothelial	YBX3
0	1.17179	0.939	0.813	0	Endothelial	UACA
0	1.17144	0.925	0.71	0	Endothelial	MX1
4.61843e-231	1.17039	0.841	0.764	9.23687e-228	Endothelial	CCDC85A
0	1.16582	0.833	0.622	0	Endothelial	ST3GAL6
0	1.16124	0.828	0.389	0	Endothelial	PROM1
4.02982e-169	1.14563	0.772	0.679	8.05963e-166	Endothelial	PRELID2
2.26689e-162	1.12775	0.716	0.543	4.53378e-159	Endothelial	ZNF385D
0	1.12762	0.888	0.789	0	Endothelial	RAMP3
0	1.12224	0.793	0.428	0	Endothelial	RAPH1
0	1.11833	0.8	0.539	0	Endothelial	SLC6A6
1.22674e-58	1.11687	0.977	0.957	2.45348e-55	Endothelial	LHFPL6
1.30717e-118	1.11293	0.75	0.707	2.61433e-115	Endothelial	VEGFC
0	1.1074	0.918	0.668	0	Endothelial	GNA14
0	1.1019	0.766	0.662	0	Endothelial	PDGFB
0	1.10105	0.82	0.422	0	Endothelial	EDN1
0	1.09886	0.872	0.522	0	Endothelial	GIMAP8
0	1.09776	0.865	0.589	0	Endothelial	PRSS23
0	1.08476	0.803	0.52	0	Endothelial	FRAS1
0	1.0823	0.925	0.68	0	Endothelial	CA4
3.03061e-164	1.07195	0.901	0.766	6.06122e-161	Endothelial	PTPRK
0	1.0699	0.839	0.76	0	Endothelial	CCDC68
0	1.05479	0.881	0.427	0	Endothelial	CD55
3.82109e-262	1.04714	0.883	0.619	7.64218e-259	Endothelial	UBC
2.30746e-33	1.04133	0.648	0.669	4.61493e-30	Endothelial	CNKSR3
0	1.03774	0.782	0.42	0	Endothelial	PLPPR4
0	1.03601	0.891	0.702	0	Endothelial	AKAP12
8.46686e-184	1.03396	0.709	0.502	1.69337e-180	Endothelial	RBM20
8.39124e-107	1.03356	0.658	0.593	1.67825e-103	Endothelial	DACH1
0	1.03353	0.947	0.759	0	Endothelial	HIST1H2AC
0	1.02884	0.794	0.744	0	Endothelial	CLEC1A
0	1.01411	0.883	0.699	0	Endothelial	VIM
1.43042e-86	1.00777	0.666	0.612	2.86083e-83	Endothelial	SYNJ2
7.10939e-307	1.00661	0.883	0.845	1.42188e-303	Endothelial	EBF1
0	0.997179	0.902	0.708	0	Endothelial	LY6E
1.30136e-166	0.993098	0.875	0.796	2.60272e-163	Endothelial	ARHGEF3
1.84055e-203	0.991757	0.705	0.69	3.6811e-200	Endothelial	CASP10
1.08313e-205	0.985449	0.704	0.722	2.16626e-202	Endothelial	SH2D3C
4.46791e-260	0.97731	0.848	0.702	8.93582e-257	Endothelial	SMAD9
1.6284e-157	0.97626	0.7	0.494	3.2568e-154	Endothelial	CALCRL
0	0.970618	0.916	0.555	0	Endothelial	DDX58
0	0.970551	0.895	0.728	0	Endothelial	ATF3
1.50101e-192	0.967299	0.718	0.616	3.00201e-189	Endothelial	ANGPT2
1.30834e-185	0.967012	0.72	0.542	2.61668e-182	Endothelial	PALD1
0	0.963532	0.803	0.647	0	Endothelial	ALPL
0	0.96338	0.764	0.444	0	Endothelial	GATA2-AS1
2.45138e-98	0.963102	0.66	0.661	4.90276e-95	Endothelial	GCH1
7.41935e-87	0.962305	0.608	0.426	1.48387e-83	Endothelial	TMSB10
0	0.962287	0.816	0.549	0	Endothelial	RASIP1
1.7109e-104	0.960437	0.626	0.483	3.4218e-101	Endothelial	ANXA3
2.45892e-224	0.958915	0.691	0.534	4.91785e-221	Endothelial	SLCO4A1
0	0.958693	0.897	0.507	0	Endothelial	KCNJ6
0	0.956314	0.946	0.638	0	Endothelial	TXNIP
0	0.950659	0.875	0.395	0	Endothelial	GATA2
0	0.950416	0.841	0.71	0	Endothelial	ARHGAP18
0	0.943426	0.754	0.508	0	Endothelial	AC002070.1
3.00725e-73	0.933318	0.684	0.647	6.01451e-70	Endothelial	PPM1H
3.9032e-92	0.929236	0.847	0.759	7.80639e-89	Endothelial	MGAT5
0	0.926476	0.758	0.447	0	Endothelial	ST8SIA4
8.85312e-223	0.924131	0.766	0.602	1.77062e-219	Endothelial	ADAMTS6
0	0.92399	0.838	0.521	0	Endothelial	SAMD12-AS1
0	0.922544	0.858	0.614	0	Endothelial	FAR2
0	0.921245	0.783	0.526	0	Endothelial	GULP1
0	0.911174	0.877	0.805	0	Endothelial	GIMAP7
2.29157e-93	0.906514	0.869	0.7	4.58314e-90	Endothelial	HSP90AA1
3.04216e-269	0.901435	0.718	0.516	6.08431e-266	Endothelial	SLFN12L
3.1568e-45	0.900131	0.605	0.441	6.3136e-42	Endothelial	CCSER1
0	0.899302	0.775	0.408	0	Endothelial	PDE3B
3.4825e-235	0.893666	0.77	0.589	6.96501e-232	Endothelial	FRMD4B
0	0.890426	0.81	0.749	0	Endothelial	LRRC32
2.47955e-159	0.886089	0.718	0.661	4.95911e-156	Endothelial	RCSD1
4.58324e-200	0.885806	0.845	0.734	9.16648e-197	Endothelial	SIPA1L2
0	0.88548	0.892	0.509	0	Endothelial	SVIL
6.50153e-136	0.882632	0.649	0.425	1.30031e-132	Endothelial	RASGRP3
0	0.880663	0.861	0.732	0	Endothelial	KCNMB4
1.03752e-234	0.878459	0.756	0.656	2.07503e-231	Endothelial	LMCD1
9.33848e-40	0.875464	0.545	0.338	1.8677e-36	Endothelial	RIMS2
2.2856e-306	0.873807	0.885	0.67	4.5712e-303	Endothelial	MGLL
0	0.873331	0.721	0.332	0	Endothelial	CDH5
1.10107e-135	0.869196	0.685	0.553	2.20214e-132	Endothelial	MIR181A1HG
7.39031e-29	0.865507	0.835	0.721	1.47806e-25	Endothelial	LRRC1
0	0.865148	0.795	0.744	0	Endothelial	MYCT1
2.81006e-86	0.863027	0.782	0.685	5.62013e-83	Endothelial	H3F3B
5.4261e-170	0.861204	0.908	0.748	1.08522e-166	Endothelial	USP53
3.6147e-107	0.859497	0.656	0.528	7.22941e-104	Endothelial	SLC16A1
0	0.858698	0.774	0.712	0	Endothelial	AFAP1L1
1.73891e-236	0.8558	0.758	0.584	3.47781e-233	Endothelial	TNFRSF10B
0	0.855447	0.888	0.78	0	Endothelial	MX2
0	0.854742	0.906	0.772	0	Endothelial	GBP2
1.22621e-126	0.849028	0.622	0.278	2.45242e-123	Endothelial	PLA1A
0	0.842881	0.761	0.435	0	Endothelial	SLCO2A1
6.61626e-142	0.842205	0.663	0.788	1.32325e-138	Endothelial	PCAT19
9.3522e-27	0.840731	0.692	0.666	1.87044e-23	Endothelial	ABCC4
6.87738e-121	0.839716	0.991	0.974	1.37548e-117	Endothelial	LRMDA
8.89616e-253	0.836079	0.71	0.548	1.77923e-249	Endothelial	SPNS2
0	0.835628	0.831	0.53	0	Endothelial	VWA2
2.97317e-259	0.835087	0.807	0.6	5.94634e-256	Endothelial	IFI16
0	0.83334	0.884	0.665	0	Endothelial	LINC02043
0	0.830106	0.769	0.519	0	Endothelial	CLEC2B
2.6914e-298	0.826647	0.787	0.559	5.3828e-295	Endothelial	ID3
2.58234e-254	0.823041	0.851	0.607	5.16467e-251	Endothelial	BACH1
0	0.821093	0.776	0.626	0	Endothelial	KLF4
3.30388e-132	0.813296	0.685	0.706	6.60776e-129	Endothelial	ITGA5
5.60156e-183	0.811916	0.689	0.57	1.12031e-179	Endothelial	TLL1
1.8871e-257	0.811743	0.808	0.691	3.7742e-254	Endothelial	MYO5C
0	0.808541	0.82	0.589	0	Endothelial	TBX3
3.97229e-161	0.806726	0.76	0.623	7.94458e-158	Endothelial	RANBP17
0	0.801268	0.79	0.626	0	Endothelial	HSPG2
3.58143e-227	0.798399	0.708	0.733	7.16285e-224	Endothelial	MIR222HG
2.13171e-233	0.794637	0.726	0.834	4.26342e-230	Endothelial	TNFSF10
5.62802e-83	0.792663	0.689	0.729	1.1256e-79	Endothelial	OSBPL10
0	0.792612	0.889	0.466	0	Endothelial	C2orf83
0	0.790412	0.783	0.538	0	Endothelial	ANKRD37
0	0.787688	0.833	0.518	0	Endothelial	KIF26B
0	0.783964	0.788	0.665	0	Endothelial	DYSF
9.14159e-265	0.783141	0.773	0.572	1.82832e-261	Endothelial	PRKCB
1.01163e-68	0.773355	0.602	0.432	2.02327e-65	Endothelial	LMO2
1.06247e-279	0.771253	0.788	0.698	2.12495e-276	Endothelial	FLVCR2
0	0.767219	0.823	0.542	0	Endothelial	TMEM204
0	0.764025	0.946	0.659	0	Endothelial	RSAD2
3.59509e-81	0.758777	0.726	0.636	7.19019e-78	Endothelial	FAM49B
0	0.757683	0.837	0.631	0	Endothelial	DEPP1
0	0.756671	0.875	0.461	0	Endothelial	SRARP
0	0.753491	0.837	0.521	0	Endothelial	GLCE
8.45702e-275	0.745924	0.781	0.519	1.6914e-271	Endothelial	SH3BGRL2
5.61102e-62	0.740257	0.786	0.749	1.1222e-58	Endothelial	JAM2
0	0.737709	0.811	0.647	0	Endothelial	RGCC
1.26863e-149	0.737588	0.669	0.578	2.53725e-146	Endothelial	ACSL5
1.00547e-140	0.73634	0.791	0.509	2.01095e-137	Endothelial	HSPB1
0	0.723458	0.809	0.351	0	Endothelial	GBP4
5.56516e-157	0.717319	0.838	0.706	1.11303e-153	Endothelial	MTRNR2L12
6.03624e-171	0.713687	0.87	0.626	1.20725e-167	Endothelial	SETBP1
1.0324e-28	0.711736	0.703	0.715	2.06481e-25	Endothelial	VCAM1
0	0.710584	0.906	0.331	0	Endothelial	SEMA3G
0	0.706779	0.828	0.633	0	Endothelial	PCDH11Y
2.06316e-239	0.70677	0.697	0.523	4.12633e-236	Endothelial	FGR
0	0.703727	0.797	0.589	0	Endothelial	TM4SF1
0	0.702294	0.862	0.708	0	Endothelial	TEC
0	0.700917	0.794	0.447	0	Endothelial	ITGA2
0	0.700762	0.754	0.349	0	Endothelial	MIR155HG
3.43181e-128	0.700569	0.73	0.687	6.86362e-125	Endothelial	MYO1D
0	0.699361	0.833	0.642	0	Endothelial	COL18A1
8.1001e-201	0.694198	0.739	0.589	1.62002e-197	Endothelial	IER2
0	0.694073	0.857	0.699	0	Endothelial	PPP1R15A
0	0.692324	0.775	0.517	0	Endothelial	TNFRSF10A
0	0.688981	0.726	0.386	0	Endothelial	PTGS2
4.20986e-24	0.68559	0.618	0.556	8.41972e-21	Endothelial	ADAMTS1
5.42013e-92	0.678609	0.791	0.547	1.08403e-88	Endothelial	KCTD8
3.73441e-160	0.677614	0.665	0.55	7.46881e-157	Endothelial	ESAM
1.05828e-277	0.674918	0.722	0.602	2.11656e-274	Endothelial	MLKL
0	0.672019	0.822	0.754	0	Endothelial	CDKN1A
0	0.669329	0.891	0.574	0	Endothelial	CYP1B1-AS1
0	0.667421	0.922	0.557	0	Endothelial	LINC00840
2.74395e-267	0.666075	0.754	0.601	5.48789e-264	Endothelial	IFIH1
3.25143e-182	0.661074	0.719	0.515	6.50286e-179	Endothelial	ZFP36
4.30423e-134	0.659062	0.916	0.719	8.60845e-131	Endothelial	ROR1
8.39623e-41	0.649764	0.984	0.99	1.67925e-37	Endothelial	NEAT1
2.80099e-240	0.644904	0.738	0.476	5.60198e-237	Endothelial	PGR
0	0.644705	0.861	0.709	0	Endothelial	ANKRD33B
2.43241e-59	0.644562	0.918	0.766	4.86482e-56	Endothelial	BACH2
4.90938e-107	0.641628	0.662	0.547	9.81875e-104	Endothelial	IFITM3
6.12337e-33	0.640328	0.561	0.494	1.22467e-29	Endothelial	NOS3
0	0.638504	0.856	0.397	0	Endothelial	KDR
4.394e-209	0.637113	0.795	0.801	8.78801e-206	Endothelial	DISC1
9.19453e-208	0.634422	0.666	0.316	1.83891e-204	Endothelial	SOX18
0	0.633926	0.832	0.395	0	Endothelial	CTGF
0	0.632676	0.897	0.459	0	Endothelial	EDN3
0	0.625698	0.762	0.519	0	Endothelial	AC098617.1
5.80687e-176	0.615297	0.753	0.66	1.16137e-172	Endothelial	BTG2
0	0.613105	0.832	0.619	0	Endothelial	KYNU
3.83286e-77	0.607482	0.783	0.684	7.66571e-74	Endothelial	RBMS3
1.04689e-204	0.597303	0.662	0.328	2.09378e-201	Endothelial	SCN2A
1.61725e-196	0.595405	0.709	0.63	3.2345e-193	Endothelial	STARD8
1.80863e-05	0.593792	0.576	0.642	0.0361727	Endothelial	GALNT17
1.44215e-105	0.588939	0.771	0.721	2.8843e-102	Endothelial	PLCL2
1.71257e-235	0.587457	0.776	0.596	3.42514e-232	Endothelial	RERG
1.43638e-78	0.586984	0.579	0.204	2.87275e-75	Endothelial	TM4SF18
0	0.583152	0.852	0.571	0	Endothelial	NHS
0	0.581739	0.822	0.714	0	Endothelial	IGFBP4
1.94285e-12	0.581665	0.62	0.707	3.8857e-09	Endothelial	NKD1
2.13549e-233	0.581027	0.88	0.6	4.27097e-230	Endothelial	DIAPH2
1.07748e-43	0.579612	0.674	0.611	2.15497e-40	Endothelial	HSPH1
0	0.579411	0.807	0.389	0	Endothelial	SLC9A2
2.98825e-63	0.57709	0.73	0.627	5.97649e-60	Endothelial	RBMS1
0	0.57133	0.887	0.614	0	Endothelial	PROS1
0	0.570115	0.874	0.586	0	Endothelial	TNFAIP3
1.02384e-153	0.564192	0.659	0.468	2.04768e-150	Endothelial	IGFBP3
0	0.561893	0.855	0.788	0	Endothelial	AC010737.1
2.02269e-49	0.560935	0.809	0.736	4.04537e-46	Endothelial	STK39
3.92744e-64	0.558905	0.723	0.611	7.85487e-61	Endothelial	OXR1
9.03112e-287	0.553382	0.716	0.573	1.80622e-283	Endothelial	DLL4
4.66901e-62	0.54643	0.711	0.634	9.33801e-59	Endothelial	NR4A2
1.18604e-176	0.542468	0.767	0.555	2.37208e-173	Endothelial	FBLN5
2.37995e-15	0.539889	0.66	0.671	4.7599e-12	Endothelial	GBE1
0	0.539191	0.888	0.571	0	Endothelial	LINC01644
9.8818e-265	0.537497	0.802	0.626	1.97636e-261	Endothelial	WARS
8.19097e-44	0.535802	0.68	0.554	1.63819e-40	Endothelial	FOS
5.1629e-303	0.532385	0.738	0.573	1.03258e-299	Endothelial	CASP4
0	0.528851	0.751	0.535	0	Endothelial	SLC5A4
8.39795e-06	0.527546	0.823	0.831	0.0167959	Endothelial	SQSTM1
0	0.527364	0.797	0.455	0	Endothelial	RGS5
1.88984e-131	0.524798	0.954	0.88	3.77969e-128	Endothelial	EPS8
1.07232e-165	0.523553	0.697	0.42	2.14464e-162	Endothelial	FGF12
0	0.520556	0.801	0.576	0	Endothelial	GCNT2
1.02416e-78	0.520268	0.851	0.752	2.04833e-75	Endothelial	VCL
0	0.516365	0.809	0.579	0	Endothelial	RP1
0	0.513992	0.854	0.596	0	Endothelial	RND3
8.74769e-119	0.512802	0.908	0.805	1.74954e-115	Endothelial	TPM1
5.37878e-06	0.511558	0.532	0.574	0.0107576	Endothelial	IL18R1
3.536e-06	0.50387	0.526	0.609	0.00707199	Endothelial	TNFRSF10D
1.87514e-42	0.494217	0.857	0.801	3.75027e-39	Endothelial	ANKH
0	0.491164	0.81	0.401	0	Endothelial	DSP
0	0.490208	0.73	0.577	0	Endothelial	SULT1B1
5.40546e-294	0.487861	0.736	0.544	1.08109e-290	Endothelial	CAV1
0	0.481562	0.846	0.457	0	Endothelial	AC007319.1
8.82049e-09	0.479973	0.864	0.848	1.7641e-05	Endothelial	EXT1
5.62023e-196	0.473926	0.704	0.473	1.12405e-192	Endothelial	TNFAIP8
9.07627e-79	0.47345	0.717	0.691	1.81525e-75	Endothelial	IGF2BP2
2.72911e-185	0.471479	0.713	0.707	5.45821e-182	Endothelial	PRX
0	0.470569	0.809	0.652	0	Endothelial	LYN
5.17139e-110	0.467193	0.803	0.854	1.03428e-106	Endothelial	AC090630.1
1.17269e-57	0.466822	0.722	0.667	2.34538e-54	Endothelial	CYTH3
2.53406e-168	0.466041	0.714	0.654	5.06812e-165	Endothelial	IL15
1.26956e-292	0.462122	0.822	0.687	2.53912e-289	Endothelial	MIR4435-2HG
7.51372e-28	0.461786	0.782	0.836	1.50274e-24	Endothelial	BBS9
3.96761e-103	0.459941	0.861	0.84	7.93523e-100	Endothelial	STK24
4.04349e-68	0.459575	0.59	0.353	8.08698e-65	Endothelial	TES
1.03007e-228	0.456083	0.815	0.686	2.06015e-225	Endothelial	MAFF
1.22815e-80	0.454505	0.66	0.722	2.4563e-77	Endothelial	ANXA1
0	0.453229	0.905	0.65	0	Endothelial	BAIAP2
1.81611e-181	0.452963	0.7	0.49	3.63221e-178	Endothelial	CXCL12
2.85488e-272	0.45277	0.809	0.678	5.70977e-269	Endothelial	NEK5
1.89137e-69	0.45146	0.654	0.685	3.78273e-66	Endothelial	PSMA1
0	0.447476	0.896	0.386	0	Endothelial	FAM19A4
2.5748e-213	0.444478	0.755	0.599	5.14959e-210	Endothelial	PIP5K1B
0	0.441612	0.826	0.58	0	Endothelial	SMIM3
3.74413e-175	0.441305	0.689	0.426	7.48826e-172	Endothelial	AL050403.2
4.27483e-87	0.439648	0.699	0.643	8.54966e-84	Endothelial	PHLDB2
0	0.438836	0.865	0.657	0	Endothelial	NHSL2
2.63129e-161	0.438505	0.947	0.917	5.26258e-158	Endothelial	SSBP3
0	0.424137	0.843	0.471	0	Endothelial	CYSLTR1
0	0.422946	0.801	0.648	0	Endothelial	TFPI
2.8436e-13	0.414847	0.654	0.612	5.6872e-10	Endothelial	SDK1
7.918e-22	0.411611	0.574	0.561	1.5836e-18	Endothelial	MGP
3.58562e-58	0.407598	0.629	0.657	7.17123e-55	Endothelial	GRB14
0	0.405899	0.847	0.637	0	Endothelial	GBP1
3.32904e-25	0.405481	0.781	0.835	6.65808e-22	Endothelial	SLC22A23
3.27973e-140	0.404528	0.787	0.647	6.55946e-137	Endothelial	TIPARP
0	0.398033	0.887	0.821	0	Endothelial	TCIM
1.06981e-124	0.396767	0.781	0.596	2.13963e-121	Endothelial	LINC01725
1.07729e-83	0.394399	0.917	0.861	2.15459e-80	Endothelial	TGFBR3
4.19577e-71	0.391474	0.927	0.696	8.39153e-68	Endothelial	BNC2
2.33517e-68	0.388631	0.621	0.59	4.67033e-65	Endothelial	FOXC1
1.05665e-14	0.385241	0.602	0.586	2.11331e-11	Endothelial	PCDH11X
1.08705e-198	0.384892	0.843	0.704	2.17409e-195	Endothelial	CEBPD
0	0.384827	0.795	0.686	0	Endothelial	NOX4
4.94673e-55	0.383105	0.594	0.532	9.89346e-52	Endothelial	AC079380.1
5.26054e-60	0.375803	0.655	0.507	1.05211e-56	Endothelial	FAM189A1
0	0.373571	0.774	0.582	0	Endothelial	FBLN2
7.36834e-23	0.37283	0.567	0.542	1.47367e-19	Endothelial	GNG11
1.58178e-135	0.371144	0.704	0.608	3.16355e-132	Endothelial	CYR61
9.73934e-76	0.368669	0.908	0.828	1.94787e-72	Endothelial	PTEN
0	0.363289	0.832	0.458	0	Endothelial	FILIP1
3.36344e-271	0.357285	0.769	0.622	6.72688e-268	Endothelial	ISM1
0	0.356581	0.863	0.709	0	Endothelial	KCNT2
0	0.355253	0.862	0.733	0	Endothelial	CYP1B1
1.22526e-218	0.353881	0.695	0.424	2.45052e-215	Endothelial	TMEM45B
2.29831e-23	0.353338	0.56	0.543	4.59663e-20	Endothelial	RNASE1
2.40864e-46	0.352688	0.66	0.576	4.81727e-43	Endothelial	SLC4A7
4.06415e-161	0.349763	0.801	0.557	8.12831e-158	Endothelial	TUSC3
1.23688e-32	0.347331	0.709	0.763	2.47376e-29	Endothelial	TNXB
3.19684e-27	0.345472	0.504	0.746	6.39368e-24	Endothelial	ICAM1
0	0.340595	0.885	0.673	0	Endothelial	BIRC3
0	0.338745	0.8	0.633	0	Endothelial	AC137770.1
4.45082e-31	0.333985	0.384	0.42	8.90163e-28	Endothelial	HS6ST2
3.83194e-64	0.333716	0.661	0.608	7.66389e-61	Endothelial	MET
0	0.333527	0.844	0.652	0	Endothelial	LINC02008
2.90552e-163	0.330039	0.695	0.669	5.81103e-160	Endothelial	LINC02249
2.27207e-95	0.328438	0.732	0.787	4.54413e-92	Endothelial	FAM84A
2.63706e-06	0.327185	0.588	0.609	0.00527411	Endothelial	CP
2.08123e-15	0.327095	0.691	0.759	4.16246e-12	Endothelial	AL133346.1
6.10215e-114	0.32495	0.679	0.6	1.22043e-110	Endothelial	OBSCN
6.78042e-276	0.324624	0.77	0.522	1.35608e-272	Endothelial	IPCEF1
1.58178e-42	0.320973	0.594	0.628	3.16357e-39	Endothelial	FOXQ1
4.2606e-40	0.318932	0.761	0.646	8.52121e-37	Endothelial	PTPRJ
3.0875e-223	0.31766	0.756	0.527	6.17499e-220	Endothelial	CXCL2
1.53836e-90	0.311614	0.674	0.583	3.07671e-87	Endothelial	GREM2
0	0.311095	0.878	0.551	0	Endothelial	AL138881.1
1.53933e-10	0.308319	0.653	0.624	3.07865e-07	Endothelial	IQCJ-SCHIP1
1.89948e-09	0.307592	0.575	0.705	3.79895e-06	Endothelial	RAI2
0	0.306199	0.825	0.698	0	Endothelial	PRSS12
9.48428e-54	0.303653	0.59	0.569	1.89686e-50	Endothelial	TRABD2A
5.42961e-290	0.29949	0.751	0.474	1.08592e-286	Endothelial	ENPP2
1.60391e-81	0.298117	0.702	0.732	3.20782e-78	Endothelial	JAG1
6.94046e-108	0.291541	0.88	0.708	1.38809e-104	Endothelial	MAN2A1
4.42964e-14	0.290237	0.559	0.723	8.85928e-11	Endothelial	EMP1
0	0.288454	0.907	0.734	0	Endothelial	NDUFA4L2
0	0.287885	0.75	0.48	0	Endothelial	EFCC1
0	0.28777	0.812	0.514	0	Endothelial	IFIT3
6.42762e-29	0.286634	0.582	0.519	1.28552e-25	Endothelial	FAM241A
1.82692e-78	0.284945	0.828	0.785	3.65383e-75	Endothelial	NFATC2
8.3103e-165	0.284718	0.818	0.827	1.66206e-161	Endothelial	ARHGAP25
1.40033e-251	0.282611	0.821	0.641	2.80066e-248	Endothelial	RFTN1
3.22139e-60	0.282106	0.603	0.404	6.44278e-57	Endothelial	LRRTM4
1.01776e-163	0.280259	0.852	0.624	2.03552e-160	Endothelial	COL4A2
0	0.278328	0.918	0.322	0	Endothelial	CXCL3
1.98008e-05	0.277423	0.578	0.647	0.0396015	Endothelial	SH3BP5
4.41028e-15	0.276241	0.599	0.585	8.82057e-12	Endothelial	SLC2A13
2.97622e-12	0.276033	0.493	0.359	5.95245e-09	Endothelial	MTUS2
0	0.272556	0.842	0.558	0	Endothelial	COL25A1
2.40086e-81	0.272431	0.661	0.473	4.80173e-78	Endothelial	ATP8A1
5.01487e-15	0.270445	0.655	0.639	1.00297e-11	Endothelial	RARB
9.31897e-64	0.269387	0.638	0.844	1.86379e-60	Endothelial	SH3RF3
6.13024e-204	0.268028	0.701	0.414	1.22605e-200	Endothelial	S100A10
3.90128e-162	0.26301	0.648	0.436	7.80256e-159	Endothelial	MMRN1
3.10167e-234	0.261942	0.698	0.531	6.20334e-231	Endothelial	AF130417.1
1.45813e-12	0.261001	0.641	0.586	2.91626e-09	Endothelial	CREM
2.60912e-163	0.255285	0.745	0.502	5.21825e-160	Endothelial	DNAH14
1.17358e-60	0.255262	0.781	0.776	2.34716e-57	Endothelial	LDLR
0	0.253851	0.914	0.59	0	Endothelial	SV2C

## Sheet: Ependymal
p_val	avg_log2FC	pct.1	pct.2	p_val_adj	cluster	gene
0	4.8107	0.987	0.605	0	Ependymal	CFAP299
0	3.59334	0.935	0.614	0	Ependymal	DNAH9
0	3.42189	0.958	0.701	0	Ependymal	AGBL1
0	3.39067	0.987	0.71	0	Ependymal	CFAP54
0	3.22071	0.96	0.636	0	Ependymal	CFAP43
0	3.20315	0.942	0.689	0	Ependymal	DNAH11
0	3.19471	0.978	0.743	0	Ependymal	C8orf34
0	3.17157	0.941	0.679	0	Ependymal	DNAH6
0	3.0948	0.943	0.707	0	Ependymal	ADGB
0	3.02718	0.894	0.657	0	Ependymal	TTC29
0	3.00685	0.975	0.732	0	Ependymal	TMEM232
0	3.00261	0.96	0.704	0	Ependymal	CFAP47
0	2.94121	0.916	0.612	0	Ependymal	DCDC1
0	2.93983	0.987	0.774	0	Ependymal	CFAP44
0	2.88523	0.977	0.807	0	Ependymal	ARMC3
0	2.8635	0.934	0.748	0	Ependymal	SPAG17
0	2.84441	0.943	0.554	0	Ependymal	DNAH12
0	2.79612	0.947	0.696	0	Ependymal	SPAG6
0	2.79134	0.938	0.541	0	Ependymal	CFAP157
0	2.72387	0.944	0.524	0	Ependymal	LRRIQ1
0	2.66607	0.929	0.447	0	Ependymal	NEK10
0	2.66311	0.936	0.644	0	Ependymal	EYA4
0	2.66204	0.945	0.663	0	Ependymal	CCDC30
0	2.64151	0.891	0.523	0	Ependymal	SPATA17
0	2.63038	0.973	0.791	0	Ependymal	VWA3A
0	2.61469	0.886	0.543	0	Ependymal	TTC6
0	2.59308	0.985	0.766	0	Ependymal	DNAH7
0	2.56525	0.96	0.713	0	Ependymal	DNAAF1
0	2.54531	0.907	0.65	0	Ependymal	DTHD1
0	2.54034	0.953	0.589	0	Ependymal	AC020718.1
0	2.52471	0.876	0.659	0	Ependymal	ZBBX
0	2.51095	0.932	0.659	0	Ependymal	TCTEX1D1
0	2.50889	0.919	0.681	0	Ependymal	LMNTD1
0	2.48721	0.933	0.598	0	Ependymal	FHAD1
0	2.47584	0.951	0.769	0	Ependymal	CFAP46
0	2.4482	0.954	0.732	0	Ependymal	PACRG
0	2.40457	0.913	0.694	0	Ependymal	DNAI1
0	2.40241	0.921	0.649	0	Ependymal	AC019330.1
0	2.39729	0.907	0.729	0	Ependymal	LINC02055
0	2.36333	0.867	0.599	0	Ependymal	CFAP52
0	2.34834	0.972	0.72	0	Ependymal	VWA3B
0	2.34802	0.933	0.698	0	Ependymal	SPEF2
0	2.33791	0.897	0.522	0	Ependymal	RSPH1
0	2.32858	0.974	0.818	0	Ependymal	HYDIN
0	2.30336	0.918	0.676	0	Ependymal	NEK5
0	2.30073	0.975	0.674	0	Ependymal	WDR63
0	2.29536	0.871	0.606	0	Ependymal	SDK1
0	2.27463	0.951	0.674	0	Ependymal	UBE3D
0	2.25426	0.962	0.685	0	Ependymal	NEK11
0	2.25234	0.949	0.682	0	Ependymal	FGF14
0	2.24756	0.929	0.652	0	Ependymal	DNAI2
0	2.23908	0.958	0.69	0	Ependymal	CCDC146
0	2.22266	0.955	0.83	0	Ependymal	TEKT1
0	2.21091	0.816	0.6	0	Ependymal	LINC00907
0	2.20841	0.982	0.803	0	Ependymal	EFCAB6
0	2.20666	0.9	0.69	0	Ependymal	SPAG16
0	2.19528	0.964	0.684	0	Ependymal	PPFIA2
0	2.18786	0.879	0.651	0	Ependymal	KIAA2012
0	2.15978	0.961	0.604	0	Ependymal	STRBP
0	2.15938	0.863	0.656	0	Ependymal	PCAT1
0	2.14793	0.944	0.58	0	Ependymal	CCDC60
0	2.13155	0.913	0.675	0	Ependymal	TSGA10
0	2.11449	0.989	0.835	0	Ependymal	PHACTR1
0	2.10815	0.958	0.838	0	Ependymal	SMOC1
0	2.0917	0.944	0.677	0	Ependymal	WDR66
0	2.07792	0.876	0.557	0	Ependymal	AC004949.1
0	2.05729	0.872	0.568	0	Ependymal	WDR78
0	2.04655	0.838	0.578	0	Ependymal	LRRC9
0	2.04301	0.879	0.572	0	Ependymal	PPP1R42
0	2.02361	0.92	0.754	0	Ependymal	CFAP73
0	2.00261	0.874	0.623	0	Ependymal	CFAP61
0	1.98416	0.939	0.716	0	Ependymal	CMSS1
0	1.97887	0.943	0.616	0	Ependymal	FOXP2
0	1.96271	0.905	0.651	0	Ependymal	CCDC170
0	1.95738	0.897	0.591	0	Ependymal	CNTN3
0	1.9499	0.865	0.599	0	Ependymal	ARMC4
0	1.94636	0.93	0.645	0	Ependymal	KIAA0825
0	1.92499	0.907	0.648	0	Ependymal	CSMD3
0	1.92466	0.955	0.801	0	Ependymal	AL022068.1
0	1.91728	0.974	0.813	0	Ependymal	CFAP70
0	1.90952	0.934	0.66	0	Ependymal	DRC1
0	1.89456	0.936	0.525	0	Ependymal	NELL2
0	1.89123	0.848	0.584	0	Ependymal	DNAH3
0	1.88261	0.882	0.591	0	Ependymal	ADGRV1
0	1.88006	0.906	0.516	0	Ependymal	C6orf118
0	1.85949	0.93	0.628	0	Ependymal	FANK1
0	1.84961	0.987	0.868	0	Ependymal	PPP1R12B
0	1.82688	0.852	0.397	0	Ependymal	GRIA1
0	1.82607	0.971	0.851	0	Ependymal	AGBL4
0	1.81862	0.897	0.783	0	Ependymal	CASC1
0	1.81607	0.914	0.567	0	Ependymal	SLIT2
0	1.81199	0.903	0.667	0	Ependymal	CFAP100
0	1.79727	0.909	0.707	0	Ependymal	TTC34
0	1.79066	0.921	0.516	0	Ependymal	VWA5B1
0	1.77238	0.922	0.768	0	Ependymal	ULK4
0	1.74102	0.923	0.586	0	Ependymal	PPIL6
0	1.74043	0.943	0.69	0	Ependymal	CROCC2
0	1.7303	0.927	0.764	0	Ependymal	CEP126
0	1.72973	0.86	0.671	0	Ependymal	C4orf47
0	1.69603	0.843	0.583	0	Ependymal	MAP3K19
0	1.69322	0.982	0.904	0	Ependymal	RFX3
0	1.68897	0.899	0.673	0	Ependymal	SLC9C2
0	1.66557	0.975	0.886	0	Ependymal	LINC00854
0	1.66276	0.895	0.674	0	Ependymal	CSPP1
0	1.6619	0.918	0.64	0	Ependymal	CFAP58
0	1.66135	0.866	0.567	0	Ependymal	DCDC2
0	1.65476	0.955	0.814	0	Ependymal	SHANK2
0	1.61804	0.859	0.545	0	Ependymal	GRIN2A
0	1.59361	0.91	0.505	0	Ependymal	CFAP77
0	1.59325	0.857	0.64	0	Ependymal	FBXL13
0	1.59228	0.948	0.725	0	Ependymal	CLVS1
6.17943e-305	1.58436	0.767	0.455	1.23589e-301	Ependymal	DNAH10
0	1.57756	0.838	0.654	0	Ependymal	CFAP221
0	1.57733	0.83	0.414	0	Ependymal	ERICH3
6.99225e-238	1.57144	0.752	0.511	1.39845e-234	Ependymal	ANKUB1
0	1.56817	0.904	0.807	0	Ependymal	RGS22
0	1.56149	0.84	0.645	0	Ependymal	NRG4
0	1.55716	0.904	0.817	0	Ependymal	PLCH1
0	1.55635	0.994	0.872	0	Ependymal	DPP10
0	1.55471	0.88	0.463	0	Ependymal	DAW1
0	1.54556	0.915	0.712	0	Ependymal	SNCAIP
0	1.5449	0.98	0.768	0	Ependymal	LINC00609
0	1.54422	0.865	0.64	0	Ependymal	EFHC2
0	1.54234	0.904	0.695	0	Ependymal	TTC23L
0	1.53266	0.914	0.547	0	Ependymal	DNAH2
1.28936e-278	1.53245	0.899	0.735	2.57872e-275	Ependymal	CRB1
0	1.53137	0.915	0.668	0	Ependymal	CASC15
0	1.52652	0.877	0.444	0	Ependymal	AL357093.2
0	1.4951	0.925	0.665	0	Ependymal	CFAP45
0	1.4851	0.897	0.762	0	Ependymal	ROR2
0	1.47506	0.9	0.715	0	Ependymal	SPATA6L
0	1.46974	0.821	0.505	0	Ependymal	LRGUK
0	1.45809	0.848	0.625	0	Ependymal	C1orf87
0	1.45659	0.805	0.672	0	Ependymal	DRC3
0	1.4557	0.881	0.582	0	Ependymal	CCDC114
0	1.45113	0.84	0.529	0	Ependymal	DLEC1
0	1.4498	0.927	0.757	0	Ependymal	CFAP97D2
1.21402e-306	1.44607	0.84	0.634	2.42805e-303	Ependymal	TRDN
0	1.43923	0.89	0.594	0	Ependymal	B3GLCT
0	1.43583	0.791	0.441	0	Ependymal	AP001831.1
0	1.43399	0.958	0.778	0	Ependymal	AC092957.1
1.1085e-248	1.43344	0.857	0.759	2.21699e-245	Ependymal	IQCH
0	1.43266	0.831	0.685	0	Ependymal	CCDC173
0	1.42423	0.867	0.519	0	Ependymal	SCN1A
0	1.42251	0.852	0.492	0	Ependymal	GABRG3
2.22009e-247	1.42244	0.751	0.586	4.44019e-244	Ependymal	ROPN1L
0	1.41722	0.928	0.761	0	Ependymal	EFCAB2
0	1.40533	0.882	0.518	0	Ependymal	USP2-AS1
6.70594e-116	1.40409	0.696	0.602	1.34119e-112	Ependymal	DNAH5
0	1.40243	0.916	0.578	0	Ependymal	MUSK
1.27934e-265	1.39414	0.998	0.963	2.55869e-262	Ependymal	MIR4300HG
0	1.38893	0.89	0.469	0	Ependymal	FAM81B
0	1.3743	0.839	0.663	0	Ependymal	IL16
3.9491e-249	1.37188	0.855	0.679	7.8982e-246	Ependymal	CASC2
7.29371e-303	1.36446	0.802	0.583	1.45874e-299	Ependymal	DYNLRB2
0	1.35276	0.855	0.379	0	Ependymal	IQGAP2
0	1.34639	0.884	0.457	0	Ependymal	DOC2A
4.05406e-46	1.33885	0.59	0.392	8.10812e-43	Ependymal	LINC01876
9.42241e-240	1.33415	0.943	0.786	1.88448e-236	Ependymal	RBFOX1
0	1.33345	0.863	0.756	0	Ependymal	SLC47A2
0	1.33075	0.898	0.639	0	Ependymal	MYLK3
0	1.32316	0.929	0.824	0	Ependymal	DYNC2H1
1.1319e-305	1.30919	0.955	0.83	2.2638e-302	Ependymal	BBS9
7.21231e-290	1.30903	0.819	0.687	1.44246e-286	Ependymal	CAPS
0	1.30089	0.825	0.608	0	Ependymal	FSIP1
0	1.30007	0.922	0.72	0	Ependymal	FBXL2
0	1.28917	0.933	0.79	0	Ependymal	FREM1
1.36273e-195	1.26594	0.762	0.596	2.72546e-192	Ependymal	CABCOCO1
0	1.26056	0.834	0.683	0	Ependymal	AC013470.2
7.56719e-212	1.26026	0.759	0.553	1.51344e-208	Ependymal	CFAP69
0	1.25743	0.899	0.514	0	Ependymal	CCDC81
0	1.25302	0.845	0.624	0	Ependymal	ANKDD1B
1.26063e-186	1.24938	0.917	0.835	2.52125e-183	Ependymal	DMD
0	1.24409	0.798	0.516	0	Ependymal	SPAG8
0	1.23785	0.958	0.695	0	Ependymal	AGPAT4
0	1.23155	0.866	0.498	0	Ependymal	CFAP65
6.83431e-280	1.231	0.802	0.528	1.36686e-276	Ependymal	RPH3A
0	1.22129	0.862	0.392	0	Ependymal	FBXO15
7.47921e-303	1.2192	0.853	0.719	1.49584e-299	Ependymal	AC233296.1
0	1.21278	0.927	0.558	0	Ependymal	DNM3
8.87655e-269	1.20869	0.87	0.784	1.77531e-265	Ependymal	RPGR
0	1.20835	0.984	0.898	0	Ependymal	PLEKHA5
1.09414e-265	1.20442	0.809	0.617	2.18828e-262	Ependymal	CLSTN2
0	1.20371	0.874	0.529	0	Ependymal	ENPEP
1.99818e-20	1.19763	0.556	0.492	3.99635e-17	Ependymal	HTR2C
1.32506e-302	1.19748	0.788	0.659	2.65013e-299	Ependymal	AK7
0	1.19066	0.84	0.7	0	Ependymal	MNS1
0	1.18752	0.885	0.682	0	Ependymal	C1orf158
7.58036e-303	1.18624	0.782	0.496	1.51607e-299	Ependymal	SLC44A5
2.00567e-238	1.18582	0.803	0.614	4.01134e-235	Ependymal	TMEM67
2.72615e-276	1.18541	0.768	0.519	5.45231e-273	Ependymal	CD36
0	1.17185	0.866	0.699	0	Ependymal	TTLL7
0	1.16473	0.83	0.603	0	Ependymal	AC093689.1
0	1.16122	0.93	0.658	0	Ependymal	AIM2
0	1.15859	0.904	0.763	0	Ependymal	OCA2
0	1.14055	0.816	0.667	0	Ependymal	ECT2L
2.31557e-303	1.13771	0.964	0.797	4.63113e-300	Ependymal	MYO1E
4.37899e-284	1.13652	0.767	0.541	8.75798e-281	Ependymal	EFCAB1
0	1.13574	0.762	0.384	0	Ependymal	PALM2
1.74294e-293	1.12019	0.823	0.596	3.48587e-290	Ependymal	RSPO2
0	1.11603	0.938	0.636	0	Ependymal	NMNAT2
0	1.10907	0.89	0.662	0	Ependymal	ABCA13
6.66615e-194	1.10042	0.768	0.713	1.33323e-190	Ependymal	MARCH10
0	1.08308	0.861	0.557	0	Ependymal	CUBN
0	1.08065	0.81	0.439	0	Ependymal	SH3GL3
8.79997e-277	1.07955	0.775	0.53	1.75999e-273	Ependymal	SPATA18
5.44047e-270	1.07856	0.873	0.523	1.08809e-266	Ependymal	HS6ST3
7.52319e-237	1.07729	0.85	0.724	1.50464e-233	Ependymal	SPAG1
0	1.04256	0.805	0.522	0	Ependymal	CFAP74
7.40964e-173	1.04254	0.788	0.672	1.48193e-169	Ependymal	TEX9
5.17921e-251	1.032	0.865	0.628	1.03584e-247	Ependymal	SETBP1
0	1.03199	0.929	0.662	0	Ependymal	TMEM163
0	1.03116	0.81	0.556	0	Ependymal	AC063979.2
0	1.01452	0.899	0.694	0	Ependymal	PTPN3
3.60146e-186	1.01263	0.952	0.917	7.20291e-183	Ependymal	SSBP3
0	1.01159	0.859	0.527	0	Ependymal	GRIK1
4.8392e-293	1.01007	0.828	0.738	9.6784e-290	Ependymal	C5AR1
9.48132e-150	1.00981	0.717	0.525	1.89626e-146	Ependymal	AL390957.1
1.00588e-253	1.00614	0.776	0.594	2.01176e-250	Ependymal	CCDC175
0	1.00227	0.796	0.681	0	Ependymal	USP43
0	1.00113	0.815	0.534	0	Ependymal	PTPRC
0	0.9908	0.863	0.672	0	Ependymal	LINC01091
0	0.987502	0.821	0.379	0	Ependymal	C9orf135
2.33469e-185	0.985146	0.805	0.631	4.66938e-182	Ependymal	COL8A1
0	0.975461	0.861	0.555	0	Ependymal	CCDC13
6.6728e-255	0.974153	0.847	0.752	1.33456e-251	Ependymal	COL4A6
0	0.972975	0.823	0.571	0	Ependymal	SNTG2
6.5823e-103	0.956425	0.682	0.44	1.31646e-99	Ependymal	CCSER1
0	0.956294	0.782	0.581	0	Ependymal	CFAP57
0	0.946509	0.818	0.477	0	Ependymal	PPP1R14C
5.46607e-194	0.945462	0.896	0.738	1.09321e-190	Ependymal	COL21A1
0	0.945311	0.885	0.699	0	Ependymal	CLIC6
0	0.944576	0.873	0.61	0	Ependymal	LMX1B
1.96914e-298	0.94077	0.754	0.292	3.93829e-295	Ependymal	SCN9A
4.51671e-301	0.93459	0.936	0.704	9.03342e-298	Ependymal	MTRNR2L12
1.65736e-200	0.933429	0.807	0.674	3.31472e-197	Ependymal	CREB5
2.49287e-208	0.92781	0.872	0.573	4.98573e-205	Ependymal	PTPRD
3.05633e-294	0.927095	0.756	0.462	6.11265e-291	Ependymal	AC026704.1
3.73044e-214	0.926494	0.797	0.559	7.46089e-211	Ependymal	KCTD16
0	0.925959	0.781	0.591	0	Ependymal	AC007091.1
3.01318e-125	0.920678	0.71	0.721	6.02637e-122	Ependymal	TRPC6
6.73737e-200	0.914761	0.674	0.299	1.34747e-196	Ependymal	CFAP53
3.57104e-255	0.908907	0.927	0.698	7.14207e-252	Ependymal	PCED1B
0	0.892699	0.881	0.817	0	Ependymal	RASSF9
1.2829e-240	0.892012	0.794	0.638	2.56581e-237	Ependymal	REEP1
2.00835e-121	0.876613	0.69	0.623	4.0167e-118	Ependymal	LINC00880
0	0.875086	0.883	0.693	0	Ependymal	ADGRD2
6.22502e-235	0.873141	0.802	0.559	1.245e-231	Ependymal	TUSC3
4.38565e-197	0.872692	0.72	0.49	8.77131e-194	Ependymal	LINC01830
4.02009e-186	0.871914	0.715	0.516	8.04019e-183	Ependymal	LRRC74B
1.13797e-27	0.865801	0.598	0.719	2.27595e-24	Ependymal	FAM160A1
3.79755e-77	0.865729	0.577	0.36	7.59509e-74	Ependymal	LINGO2
2.46866e-121	0.864381	0.859	0.681	4.93732e-118	Ependymal	DSCAM
1.36878e-67	0.857638	0.669	0.595	2.73755e-64	Ependymal	AK9
3.12466e-123	0.852381	0.669	0.511	6.24932e-120	Ependymal	CERKL
5.7887e-42	0.848697	0.7	0.764	1.15774e-38	Ependymal	AC007563.2
3.36526e-117	0.847017	0.721	0.496	6.73052e-114	Ependymal	KIAA1549L
3.4106e-101	0.833168	0.73	0.714	6.82121e-98	Ependymal	ARHGAP18
0	0.833032	0.885	0.461	0	Ependymal	ADD2
2.22083e-263	0.833022	0.92	0.796	4.44166e-260	Ependymal	CACNA1A
0	0.829434	0.903	0.799	0	Ependymal	COL5A1
1.04489e-110	0.827639	0.843	0.803	2.08978e-107	Ependymal	STOX2
5.35766e-196	0.825088	0.714	0.597	1.07153e-192	Ependymal	C7orf57
0	0.820497	0.876	0.702	0	Ependymal	EPB41L4A
1.83068e-57	0.818926	0.653	0.688	3.66135e-54	Ependymal	RNF43
7.18152e-49	0.81579	0.744	0.726	1.4363e-45	Ependymal	ROR1
0	0.815419	0.846	0.407	0	Ependymal	PRR29
2.55662e-218	0.808981	0.771	0.647	5.11323e-215	Ependymal	ANKRD45
0	0.804704	0.872	0.52	0	Ependymal	KIF26B
4.1516e-69	0.804262	0.723	0.596	8.30319e-66	Ependymal	C8orf37-AS1
1.50827e-33	0.803132	0.598	0.532	3.01654e-30	Ependymal	CCDC138
5.34618e-173	0.795187	0.9	0.774	1.06924e-169	Ependymal	NOS1AP
2.92013e-172	0.794322	0.897	0.691	5.84025e-169	Ependymal	UNC79
2.43324e-126	0.793498	0.765	0.676	4.86648e-123	Ependymal	CCDC148
2.111e-98	0.793138	0.68	0.678	4.222e-95	Ependymal	WDR93
0	0.789111	0.813	0.476	0	Ependymal	KCNE1
2.91959e-173	0.788459	0.978	0.845	5.83917e-170	Ependymal	EXT1
0	0.786471	0.947	0.813	0	Ependymal	TNFRSF19
4.34025e-73	0.783753	0.641	0.579	8.6805e-70	Ependymal	BASP1-AS1
6.15688e-294	0.782849	0.767	0.586	1.23138e-290	Ependymal	CAPSL
0	0.780112	0.804	0.28	0	Ependymal	AL645937.2
1.35507e-158	0.779983	0.8	0.667	2.71015e-155	Ependymal	ATRNL1
1.61923e-145	0.779759	0.868	0.656	3.23846e-142	Ependymal	TSC22D1
0	0.779039	0.808	0.622	0	Ependymal	MAPK15
3.91313e-109	0.774375	0.816	0.779	7.82626e-106	Ependymal	COBL
2.53857e-90	0.762581	0.801	0.645	5.07715e-87	Ependymal	DGKI
2.14554e-191	0.759863	0.72	0.43	4.29108e-188	Ependymal	LMO2
2.1247e-95	0.759694	0.722	0.539	4.24939e-92	Ependymal	PPM1E
8.35196e-115	0.756811	0.703	0.736	1.67039e-111	Ependymal	PTPRQ
1.0408e-272	0.756657	0.83	0.592	2.0816e-269	Ependymal	AL603840.1
4.05985e-122	0.754704	0.761	0.589	8.11971e-119	Ependymal	GAS7
1.71063e-180	0.746665	0.979	0.912	3.42126e-177	Ependymal	KCNMA1
2.96198e-86	0.735697	0.815	0.727	5.92395e-83	Ependymal	LINC00894
3.59874e-44	0.73414	0.655	0.622	7.19748e-41	Ependymal	LEKR1
0	0.733968	0.848	0.609	0	Ependymal	LRRC71
7.9626e-189	0.732344	0.86	0.58	1.59252e-185	Ependymal	NLGN1
0	0.724713	0.871	0.474	0	Ependymal	SATB2
0	0.723874	0.907	0.626	0	Ependymal	SLC27A6
0	0.723285	0.948	0.68	0	Ependymal	TMEM132B
1.37382e-147	0.720442	0.92	0.841	2.74764e-144	Ependymal	ANKS1A
7.41597e-94	0.719068	0.781	0.712	1.48319e-90	Ependymal	KIF6
2.77637e-109	0.717791	0.981	0.935	5.55274e-106	Ependymal	GLIS3
1.09546e-275	0.714164	0.781	0.666	2.19092e-272	Ependymal	C8orf34-AS1
9.42257e-130	0.713655	0.975	0.882	1.88451e-126	Ependymal	PRKG1
0	0.711658	0.91	0.668	0	Ependymal	MYO3A
6.38193e-139	0.711396	0.8	0.629	1.27639e-135	Ependymal	AC034195.1
0	0.706137	0.79	0.462	0	Ependymal	FAM183A
1.01119e-143	0.701451	0.716	0.52	2.02238e-140	Ependymal	AP002026.1
2.38649e-83	0.698826	0.819	0.655	4.77297e-80	Ependymal	ROBO2
2.30922e-56	0.693473	0.631	0.635	4.61845e-53	Ependymal	KIAA1257
0	0.68946	0.842	0.52	0	Ependymal	AP005433.1
9.56964e-114	0.682613	0.677	0.528	1.91393e-110	Ependymal	ARNTL2
2.34606e-93	0.68202	0.69	0.637	4.69212e-90	Ependymal	AC018467.1
0	0.681685	0.878	0.669	0	Ependymal	COL28A1
2.20465e-199	0.681511	0.832	0.599	4.40931e-196	Ependymal	CRISPLD1
4.78087e-101	0.68003	0.739	0.621	9.56173e-98	Ependymal	PROS1
4.83878e-112	0.678962	0.843	0.709	9.67757e-109	Ependymal	GREB1L
3.57194e-186	0.676002	0.786	0.65	7.14388e-183	Ependymal	NCALD
1.9844e-258	0.675962	0.735	0.486	3.96879e-255	Ependymal	C11orf88
2.0415e-145	0.675412	0.984	0.943	4.08299e-142	Ependymal	IGF1R
4.51162e-134	0.666947	0.909	0.746	9.02325e-131	Ependymal	ALK
1.25541e-160	0.665421	0.743	0.573	2.51083e-157	Ependymal	ADAMTS3
0	0.665092	0.788	0.381	0	Ependymal	IL5RA
1.56205e-155	0.662215	0.925	0.76	3.1241e-152	Ependymal	DPYSL3
1.14726e-12	0.656187	0.602	0.612	2.29452e-09	Ependymal	CYR61
2.35433e-68	0.655328	0.748	0.568	4.70866e-65	Ependymal	GRIP1
1.26744e-45	0.652799	0.76	0.787	2.53488e-42	Ependymal	NFATC2
1.54599e-06	0.648088	0.589	0.641	0.00309198	Ependymal	GALNT17
2.07662e-197	0.647742	0.76	0.575	4.15324e-194	Ependymal	C3orf67
3.40316e-83	0.646486	0.839	0.712	6.80632e-80	Ependymal	NEGR1
1.32806e-195	0.64483	0.772	0.528	2.65611e-192	Ependymal	ITGA8
2.82794e-210	0.636838	0.901	0.836	5.65589e-207	Ependymal	SORBS2
0	0.636241	0.936	0.509	0	Ependymal	AC013546.1
7.25502e-83	0.63309	0.652	0.696	1.451e-79	Ependymal	AC097713.1
0	0.628692	0.902	0.478	0	Ependymal	CD24
2.27238e-131	0.620011	0.68	0.421	4.54476e-128	Ependymal	SCIN
0	0.618071	0.982	0.754	0	Ependymal	TNXB
9.12847e-97	0.613291	0.797	0.66	1.82569e-93	Ependymal	RASAL2
1.1762e-267	0.61229	0.919	0.651	2.3524e-264	Ependymal	PLCB4
0	0.609605	0.919	0.501	0	Ependymal	AC007906.2
4.12289e-23	0.60958	0.63	0.561	8.24578e-20	Ependymal	FAM19A2
2.70943e-67	0.608416	0.751	0.657	5.41887e-64	Ependymal	GPR39
2.11657e-157	0.608152	0.781	0.584	4.23315e-154	Ependymal	L3MBTL4
0	0.585788	0.882	0.493	0	Ependymal	EBF2
3.54649e-46	0.585167	0.777	0.696	7.09297e-43	Ependymal	GRIK2
1.63726e-82	0.585068	0.842	0.684	3.27453e-79	Ependymal	STPG2
0	0.578898	0.897	0.226	0	Ependymal	BMP3
1.67677e-173	0.577648	0.677	0.313	3.35354e-170	Ependymal	SYN2
1.12772e-66	0.574729	0.611	0.488	2.25544e-63	Ependymal	PZP
5.68993e-208	0.562309	0.754	0.598	1.13799e-204	Ependymal	SV2C
0	0.560124	0.89	0.632	0	Ependymal	OR14J1
0	0.557779	0.906	0.688	0	Ependymal	TCERG1L
1.23808e-17	0.555349	0.608	0.786	2.47616e-14	Ependymal	C10orf67
1.88944e-09	0.550557	0.485	0.389	3.77887e-06	Ependymal	TEX41
6.65511e-223	0.549169	0.778	0.612	1.33102e-219	Ependymal	CACNA1E
6.92766e-190	0.548845	0.787	0.477	1.38553e-186	Ependymal	MMP16
0	0.544549	0.932	0.716	0	Ependymal	AC026347.1
4.15741e-160	0.544288	0.74	0.555	8.31483e-157	Ependymal	ESR1
3.98537e-77	0.544189	0.867	0.808	7.97075e-74	Ependymal	RTN1
1.71568e-07	0.538246	0.637	0.707	0.000343135	Ependymal	EFCAB11
2.43441e-100	0.537461	0.762	0.577	4.86882e-97	Ependymal	NHS
9.38166e-221	0.535726	0.869	0.565	1.87633e-217	Ependymal	ACTN4
1.55968e-122	0.533543	0.726	0.53	3.11936e-119	Ependymal	GULP1
4.88459e-81	0.525077	0.646	0.528	9.76918e-78	Ependymal	MLIP
3.61546e-87	0.524616	0.765	0.634	7.23092e-84	Ependymal	KCNJ3
0	0.524313	0.801	0.412	0	Ependymal	PALM2-AKAP2
5.84992e-55	0.515217	0.659	0.538	1.16998e-51	Ependymal	AF165147.1
2.33769e-49	0.51383	0.674	0.532	4.67538e-46	Ependymal	OPCML
0	0.5124	0.893	0.746	0	Ependymal	WDR86
2.88701e-119	0.510221	0.71	0.473	5.77402e-116	Ependymal	ATP8A1
7.55209e-253	0.50932	0.754	0.438	1.51042e-249	Ependymal	POU2AF1
6.32142e-76	0.508627	0.645	0.449	1.26428e-72	Ependymal	PGM5
2.15272e-139	0.506891	0.669	0.436	4.30545e-136	Ependymal	AC096637.2
6.65275e-263	0.503278	0.838	0.753	1.33055e-259	Ependymal	AL133346.1
4.47558e-68	0.50302	0.64	0.506	8.95116e-65	Ependymal	LINC02223
9.89391e-54	0.501963	0.74	0.611	1.97878e-50	Ependymal	AC073050.1
1.48068e-23	0.500957	0.691	0.737	2.96137e-20	Ependymal	RALGPS2
3.58127e-46	0.496988	0.42	0.573	7.16254e-43	Ependymal	COL25A1
1.50894e-54	0.495904	0.659	0.601	3.01788e-51	Ependymal	RERG
4.61591e-100	0.492662	0.841	0.547	9.23181e-97	Ependymal	CSMD1
7.51897e-62	0.490897	0.64	0.529	1.50379e-58	Ependymal	GALNT3
8.96336e-192	0.490552	0.793	0.586	1.79267e-188	Ependymal	ADGRL2
2.11976e-20	0.48922	0.636	0.613	4.23952e-17	Ependymal	HSPH1
1.71486e-83	0.488727	0.865	0.702	3.42971e-80	Ependymal	PTPRT
1.5798e-185	0.485287	0.705	0.418	3.15959e-182	Ependymal	AC087280.2
1.37732e-41	0.485274	0.625	0.509	2.75464e-38	Ependymal	KIRREL3
1.12141e-197	0.478099	0.748	0.595	2.24282e-194	Ependymal	BARX2
3.10456e-98	0.476068	0.707	0.689	6.20911e-95	Ependymal	CA4
0	0.471557	0.916	0.703	0	Ependymal	VEGFC
5.05255e-55	0.470237	0.677	0.506	1.01051e-51	Ependymal	MYO16
8.5437e-146	0.469838	0.861	0.687	1.70874e-142	Ependymal	ADAMTS17
2.15008e-76	0.468312	0.884	0.816	4.30015e-73	Ependymal	WWTR1
1.4113e-80	0.462831	0.744	0.643	2.82259e-77	Ependymal	PLXNC1
1.05904e-235	0.460199	0.866	0.69	2.11808e-232	Ependymal	MYO5C
1.41789e-278	0.459924	0.232	0.53	2.83577e-275	Ependymal	NNAT
1.22431e-54	0.45953	0.589	0.422	2.44862e-51	Ependymal	C11orf16
7.41648e-63	0.454191	0.62	0.517	1.4833e-59	Ependymal	PAK5
7.20756e-42	0.451611	0.587	0.386	1.44151e-38	Ependymal	LRRC63
1.26139e-47	0.451524	0.599	0.448	2.52278e-44	Ependymal	FREM2
1.10462e-31	0.448618	0.665	0.606	2.20924e-28	Ependymal	CACNA1D
0	0.448301	0.896	0.619	0	Ependymal	NEURL1B
6.40945e-79	0.446523	0.849	0.786	1.28189e-75	Ependymal	FLNB
2.53301e-119	0.443623	0.935	0.817	5.06602e-116	Ependymal	SH3D19
1.64647e-149	0.442053	0.77	0.646	3.29294e-146	Ependymal	XACT
0	0.439342	0.934	0.392	0	Ependymal	TNFRSF11B
0	0.437961	0.929	0.747	0	Ependymal	AC009435.1
6.80201e-26	0.432037	0.743	0.737	1.3604e-22	Ependymal	TENM3
1.35263e-86	0.430362	0.731	0.583	2.70527e-83	Ependymal	P3H2
3.10966e-225	0.427794	0.811	0.679	6.21932e-222	Ependymal	RHOBTB1
0	0.425016	0.889	0.388	0	Ependymal	MOXD1
1.05888e-24	0.418106	0.856	0.869	2.11777e-21	Ependymal	MEIS2
0	0.417924	0.842	0.512	0	Ependymal	OR2J2
1.31714e-44	0.406025	0.69	0.595	2.63427e-41	Ependymal	KSR2
8.98032e-219	0.405888	0.778	0.789	1.79606e-215	Ependymal	LMX1A
4.03642e-53	0.403606	0.678	0.614	8.07284e-50	Ependymal	NTN4
6.96911e-52	0.402068	0.754	0.59	1.39382e-48	Ependymal	NKAIN2
1.59474e-223	0.400454	0.882	0.746	3.18947e-220	Ependymal	ZIC1
2.13893e-62	0.400245	0.808	0.705	4.27786e-59	Ependymal	AC110023.1
8.23446e-110	0.396795	0.643	0.38	1.64689e-106	Ependymal	AC007656.1
1.1695e-26	0.394033	0.631	0.57	2.339e-23	Ependymal	AC097515.1
8.67661e-127	0.393658	0.765	0.726	1.73532e-123	Ependymal	TG
5.9101e-201	0.392846	0.726	0.391	1.18202e-197	Ependymal	SVEP1
3.24219e-129	0.38899	0.893	0.795	6.48439e-126	Ependymal	PTPRG
5.56803e-71	0.386637	0.934	0.822	1.11361e-67	Ependymal	FRMPD4
6.48927e-174	0.385838	0.774	0.689	1.29785e-170	Ependymal	AC063944.1
2.0235e-91	0.384035	0.778	0.758	4.047e-88	Ependymal	AL445472.1
2.18924e-06	0.383663	0.596	0.666	0.00437848	Ependymal	NDST3
0	0.383593	0.882	0.577	0	Ependymal	ABCB11
1.1924e-138	0.381066	0.748	0.702	2.38481e-135	Ependymal	NKD1
3.03297e-212	0.380829	0.754	0.616	6.06594e-209	Ependymal	GDA
6.62658e-99	0.380252	0.846	0.661	1.32532e-95	Ependymal	PCLO
7.28017e-138	0.379561	0.746	0.518	1.45603e-134	Ependymal	AL157911.1
3.89249e-26	0.377233	0.679	0.598	7.78497e-23	Ependymal	MARCH1
5.54574e-45	0.376798	0.711	0.705	1.10915e-41	Ependymal	PPP1R15A
1.96433e-79	0.371643	0.924	0.824	3.92866e-76	Ependymal	TGFB2
2.5207e-94	0.369796	0.639	0.473	5.0414e-91	Ependymal	FAM216B
1.15127e-17	0.368791	0.457	0.565	2.30253e-14	Ependymal	CDK6
0	0.368532	0.927	0.68	0	Ependymal	MYRIP
1.26001e-206	0.367509	0.761	0.565	2.52002e-203	Ependymal	MRAP2
2.72287e-80	0.366885	0.645	0.601	5.44574e-77	Ependymal	SLC28A3
1.78903e-91	0.362191	0.632	0.423	3.57807e-88	Ependymal	ST6GALNAC5
3.26231e-28	0.358696	0.748	0.739	6.52463e-25	Ependymal	AP000943.3
4.45187e-213	0.357491	0.772	0.718	8.90374e-210	Ependymal	ANXA1
8.03304e-135	0.355239	0.947	0.853	1.60661e-131	Ependymal	RNF220
4.02914e-49	0.351562	0.64	0.474	8.05829e-46	Ependymal	PCDH15
5.51862e-224	0.346355	0.74	0.447	1.10372e-220	Ependymal	AC100849.1
6.38038e-298	0.345454	0.761	0.477	1.27608e-294	Ependymal	LINC01798
7.88606e-141	0.343738	0.722	0.691	1.57721e-137	Ependymal	SEMA5B
4.98797e-286	0.336805	0.903	0.782	9.97593e-283	Ependymal	GPR156
8.32877e-94	0.33481	0.704	0.641	1.66575e-90	Ependymal	VWC2L
8.25588e-276	0.32901	0.842	0.621	1.65118e-272	Ependymal	FGF13
2.27558e-05	0.328074	0.577	0.576	0.0455115	Ependymal	SYT16
1.13552e-213	0.325176	0.856	0.656	2.27105e-210	Ependymal	COL5A2
1.80853e-35	0.322534	0.723	0.709	3.61705e-32	Ependymal	FAM107B
8.79223e-141	0.320152	0.791	0.752	1.75845e-137	Ependymal	ARHGEF28
2.46174e-61	0.31656	0.673	0.502	4.92349e-58	Ependymal	KCNQ5
5.44287e-52	0.314326	0.46	0.778	1.08857e-48	Ependymal	SMYD2
2.66452e-39	0.313712	0.981	0.962	5.32905e-36	Ependymal	LINC01088
5.72007e-54	0.313354	0.748	0.769	1.14401e-50	Ependymal	CLMN
1.56736e-48	0.313087	0.657	0.484	3.13473e-45	Ependymal	NRG1
2.3665e-284	0.311706	0.833	0.561	4.73301e-281	Ependymal	CHRM3
2.21216e-27	0.310932	0.578	0.523	4.42433e-24	Ependymal	C12orf42
2.11883e-204	0.309863	0.716	0.603	4.23767e-201	Ependymal	AL161908.1
1.70413e-71	0.308934	0.703	0.553	3.40825e-68	Ependymal	RERGL
2.45501e-09	0.306979	0.63	0.554	4.91002e-06	Ependymal	KCTD8
1.37621e-55	0.305436	0.726	0.603	2.75242e-52	Ependymal	KLHL13
1.9019e-87	0.305361	0.812	0.775	3.8038e-84	Ependymal	JAM3
2.77124e-112	0.302836	0.71	0.502	5.54247e-109	Ependymal	AC109466.1
1.66919e-113	0.30078	0.727	0.683	3.33837e-110	Ependymal	AC007221.2
1.88817e-77	0.299404	0.905	0.767	3.77635e-74	Ependymal	PTPRK
1.48928e-207	0.294403	0.793	0.606	2.97855e-204	Ependymal	AC016152.1
1.42312e-33	0.294389	0.441	0.56	2.84624e-30	Ependymal	MYO5B
5.28626e-57	0.292282	0.812	0.736	1.05725e-53	Ependymal	EVA1C
9.69369e-152	0.292035	0.961	0.891	1.93874e-148	Ependymal	AL591686.2
4.78044e-80	0.290171	0.716	0.778	9.56088e-77	Ependymal	PAX7
1.39918e-137	0.290146	0.741	0.519	2.79835e-134	Ependymal	EPHA7
8.38183e-46	0.289258	0.816	0.652	1.67637e-42	Ependymal	GPC6
7.42454e-17	0.284738	0.625	0.595	1.48491e-13	Ependymal	FBN2
1.1253e-53	0.279432	0.594	0.414	2.25061e-50	Ependymal	HS3ST4
8.79088e-08	0.278833	0.616	0.637	0.000175818	Ependymal	AC073569.2
5.42995e-45	0.277938	0.701	0.497	1.08599e-41	Ependymal	GALNT13
7.20161e-79	0.275341	0.693	0.649	1.44032e-75	Ependymal	LINC01170
5.44082e-23	0.275298	0.68	0.655	1.08816e-19	Ependymal	AFF3
2.03908e-72	0.274947	0.664	0.608	4.07815e-69	Ependymal	FAM95C
5.5112e-21	0.270714	0.887	0.767	1.10224e-17	Ependymal	PDZRN4
3.51398e-55	0.269106	0.695	0.54	7.02797e-52	Ependymal	PAX3
1.05215e-55	0.266165	0.655	0.534	2.10431e-52	Ependymal	AC109927.1
4.86446e-72	0.263874	0.369	0.587	9.72893e-69	Ependymal	ZNF536
1.02683e-215	0.263013	0.721	0.507	2.05366e-212	Ependymal	HS3ST3A1
2.27947e-73	0.260446	0.707	0.703	4.55893e-70	Ependymal	TBL1Y
4.63717e-69	0.259948	0.623	0.434	9.27435e-66	Ependymal	LRRIQ3
7.40123e-38	0.259055	0.679	0.739	1.48025e-34	Ependymal	KCNMB4
1.69794e-34	0.258653	0.546	0.289	3.39588e-31	Ependymal	AC090125.1
0	0.256325	0.803	0.394	0	Ependymal	PROM1
6.46849e-42	0.252911	0.791	0.78	1.2937e-38	Ependymal	PRUNE2
8.62979e-08	0.250979	0.484	0.582	0.000172596	Ependymal	AC005165.1

## Sheet: Pericytes
p_val	avg_log2FC	pct.1	pct.2	p_val_adj	cluster	gene
0	5.24024	0.995	0.644	0	Pericytes	DLC1
0	4.68254	0.992	0.503	0	Pericytes	GRM8
0	4.16311	0.989	0.568	0	Pericytes	SLC38A11
0	3.93361	0.971	0.477	0	Pericytes	FRMD3
0	3.89613	0.984	0.608	0	Pericytes	CARMN
0	3.79754	0.998	0.843	0	Pericytes	EBF1
0	3.73948	0.995	0.556	0	Pericytes	SMOC2
0	3.73499	0.938	0.682	0	Pericytes	GRM3
0	3.69831	0.98	0.697	0	Pericytes	MYO1B
0	3.62271	0.995	0.656	0	Pericytes	ITIH5
0	3.60674	0.984	0.456	0	Pericytes	RGS5
0	3.40708	0.988	0.638	0	Pericytes	NOTCH3
0	3.30652	0.958	0.587	0	Pericytes	DACH1
0	3.27293	0.968	0.702	0	Pericytes	SLC6A12
0	3.26792	0.988	0.629	0	Pericytes	INPP4B
0	3.25863	0.983	0.763	0	Pericytes	CLMN
0	3.2429	0.989	0.766	0	Pericytes	PTPRK
0	3.20285	0.978	0.692	0	Pericytes	PTH1R
0	3.16616	0.943	0.54	0	Pericytes	LINC02147
0	3.15546	0.993	0.851	0	Pericytes	CALD1
0	3.14058	0.955	0.69	0	Pericytes	ADARB2
0	3.13265	0.983	0.671	0	Pericytes	COBLL1
0	3.12625	0.976	0.605	0	Pericytes	PLXDC1
0	3.10072	0.986	0.81	0	Pericytes	PDGFRB
0	3.02471	0.99	0.708	0	Pericytes	KCNT2
0	3.02162	0.991	0.827	0	Pericytes	PTEN
0	2.99836	0.981	0.668	0	Pericytes	CASC15
0	2.94184	0.944	0.529	0	Pericytes	CPM
0	2.94092	0.968	0.597	0	Pericytes	CDH6
0	2.9164	0.985	0.632	0	Pericytes	ARHGAP6
0	2.91599	0.997	0.916	0	Pericytes	SLC6A1
0	2.90392	0.994	0.698	0	Pericytes	IGFBP7
0	2.85334	0.98	0.741	0	Pericytes	SNRK
0	2.82791	0.986	0.671	0	Pericytes	MGLL
0	2.82176	0.929	0.55	0	Pericytes	P2RY14
0	2.78472	0.989	0.881	0	Pericytes	EPS8
0	2.74118	0.989	0.651	0	Pericytes	PLCB4
0	2.72615	0.945	0.457	0	Pericytes	TRPC3
0	2.71355	0.99	0.695	0	Pericytes	SYNE2
0	2.7115	0.983	0.569	0	Pericytes	RCAN2
0	2.70902	0.995	0.882	0	Pericytes	PRKG1
0	2.68971	0.971	0.622	0	Pericytes	ARHGAP10
0	2.65216	0.959	0.789	0	Pericytes	SLC19A1
0	2.64038	0.929	0.646	0	Pericytes	SEMA5A
0	2.62141	0.965	0.779	0	Pericytes	AC092957.1
0	2.62028	0.928	0.765	0	Pericytes	PLCL1
0	2.59879	0.978	0.632	0	Pericytes	SH3KBP1
0	2.58935	0.953	0.539	0	Pericytes	PALD1
0	2.56395	0.978	0.75	0	Pericytes	APBB2
0	2.54724	0.985	0.598	0	Pericytes	FN1
0	2.52174	0.883	0.575	0	Pericytes	RNF152
0	2.51693	0.941	0.58	0	Pericytes	SLC12A7
0	2.51686	0.893	0.532	0	Pericytes	MSC-AS1
0	2.46999	0.978	0.786	0	Pericytes	GRK5
0	2.46538	0.959	0.473	0	Pericytes	DCN
0	2.4613	0.944	0.541	0	Pericytes	TRPC4
0	2.45199	0.972	0.632	0	Pericytes	LAMA2
0	2.43802	0.892	0.543	0	Pericytes	CNTN4
0	2.43535	0.979	0.646	0	Pericytes	NCALD
0	2.43254	0.945	0.376	0	Pericytes	PDE5A
0	2.40728	0.914	0.687	0	Pericytes	MIR4435-2HG
0	2.4007	0.985	0.817	0	Pericytes	ZEB1
0	2.39807	0.934	0.541	0	Pericytes	RAPGEF5
0	2.37493	0.98	0.874	0	Pericytes	CACNA1C
0	2.37098	0.959	0.707	0	Pericytes	ETS1
0	2.35878	0.893	0.523	0	Pericytes	PDE1C
0	2.32809	0.992	0.793	0	Pericytes	PTPRG
0	2.32627	0.968	0.691	0	Pericytes	ARHGAP29
0	2.3181	0.968	0.641	0	Pericytes	RFTN1
0	2.30504	0.959	0.641	0	Pericytes	TESC
0	2.29692	0.959	0.529	0	Pericytes	EDNRA
0	2.29612	0.978	0.66	0	Pericytes	DAB1
0	2.29291	0.918	0.651	0	Pericytes	SLC30A10
0	2.28001	0.87	0.484	0	Pericytes	GJC1
0	2.27554	0.958	0.445	0	Pericytes	THSD7B
0	2.27313	0.992	0.802	0	Pericytes	RBPMS
0	2.26338	0.975	0.84	0	Pericytes	SLC20A2
0	2.24231	0.971	0.435	0	Pericytes	CHSY3
0	2.23529	0.945	0.519	0	Pericytes	DOK6
0	2.23281	0.981	0.859	0	Pericytes	NR2F2-AS1
0	2.22288	0.967	0.725	0	Pericytes	DLEU2
0	2.20585	0.956	0.653	0	Pericytes	STAC
0	2.2014	0.992	0.834	0	Pericytes	DMD
0	2.1981	0.921	0.558	0	Pericytes	SLC6A1-AS1
0	2.18784	0.877	0.57	0	Pericytes	COL4A3
3.20529e-265	2.1702	0.798	0.617	6.41058e-262	Pericytes	AC012409.2
0	2.16609	0.947	0.431	0	Pericytes	RAPH1
0	2.166	0.906	0.664	0	Pericytes	CYTH3
0	2.15031	0.89	0.829	0	Pericytes	RIPOR3
0	2.15027	0.926	0.717	0	Pericytes	ITGA1
0	2.12599	0.869	0.708	0	Pericytes	LZTS1
0	2.12003	0.989	0.785	0	Pericytes	ADAMTS9-AS2
0	2.11926	0.94	0.643	0	Pericytes	TXNIP
0	2.08941	0.889	0.698	0	Pericytes	SLC6A13
0	2.05801	0.838	0.465	0	Pericytes	SLC12A2
0	2.05569	0.88	0.567	0	Pericytes	COL4A4
0	2.05022	0.921	0.824	0	Pericytes	MPPED2
0	2.04186	0.898	0.758	0	Pericytes	RHOJ
0	2.00948	0.98	0.86	0	Pericytes	PDE7B
0	2.00217	0.982	0.91	0	Pericytes	ZFHX3
0	1.99941	0.933	0.713	0	Pericytes	HES4
0	1.99769	0.985	0.701	0	Pericytes	EPB41L4A
0	1.98081	0.866	0.513	0	Pericytes	UNC5C
0	1.97417	0.952	0.711	0	Pericytes	LINC01197
0	1.9536	0.921	0.597	0	Pericytes	FHL5
0	1.95025	0.874	0.731	0	Pericytes	CYSLTR2
3.19426e-277	1.93507	0.867	0.686	6.38852e-274	Pericytes	PAG1
0	1.92917	0.892	0.737	0	Pericytes	NDUFA4L2
0	1.91584	0.905	0.757	0	Pericytes	KIRREL1
0	1.90668	0.965	0.541	0	Pericytes	A2M
0	1.88723	0.865	0.671	0	Pericytes	LAMC3
0	1.88027	0.965	0.447	0	Pericytes	RGS7BP
0	1.86718	0.918	0.639	0	Pericytes	PHLDB2
0	1.85243	0.946	0.787	0	Pericytes	PLCE1
0	1.83394	0.907	0.624	0	Pericytes	RBMS1
0	1.83186	0.971	0.65	0	Pericytes	MYH9
0	1.83077	0.975	0.596	0	Pericytes	PIP5K1B
6.23124e-205	1.81236	0.789	0.68	1.24625e-201	Pericytes	PCBP3
0	1.80202	0.906	0.515	0	Pericytes	DGKH
0	1.79551	0.856	0.649	0	Pericytes	TFPI
0	1.79004	0.971	0.725	0	Pericytes	JAG1
0	1.78615	0.936	0.682	0	Pericytes	RBMS3
0	1.77601	0.944	0.595	0	Pericytes	RERG
0	1.76215	0.867	0.698	0	Pericytes	TBX2
0	1.7482	0.979	0.602	0	Pericytes	DIAPH2
0	1.74483	0.906	0.683	0	Pericytes	MYO1D
8.43479e-290	1.74018	0.875	0.599	1.68696e-286	Pericytes	MEF2C
0	1.71799	0.965	0.503	0	Pericytes	AL049646.1
0	1.70245	0.863	0.668	0	Pericytes	PPARGC1B
0	1.68397	0.914	0.551	0	Pericytes	BGN
0	1.68388	0.92	0.566	0	Pericytes	ACTN4
0	1.67266	0.947	0.667	0	Pericytes	LEF1
0	1.64729	0.973	0.542	0	Pericytes	IFITM3
0	1.63637	0.926	0.784	0	Pericytes	PAPSS2
0	1.62612	0.924	0.765	0	Pericytes	EPAS1
2.40191e-239	1.6246	0.81	0.528	4.80382e-236	Pericytes	GUCY1A2
0	1.62125	0.874	0.71	0	Pericytes	ADGRD1
2.03412e-293	1.61396	0.849	0.624	4.06824e-290	Pericytes	CCDC3
0	1.59105	0.97	0.585	0	Pericytes	IL34
1.57851e-287	1.58203	0.941	0.654	3.15703e-284	Pericytes	LDB2
0	1.5685	0.977	0.842	0	Pericytes	TACC1
0	1.55162	0.964	0.625	0	Pericytes	COL4A2
9.42272e-182	1.55085	0.989	0.907	1.88454e-178	Pericytes	IMMP2L
0	1.54253	0.886	0.602	0	Pericytes	CFH
1.73197e-286	1.53878	0.991	0.929	3.46394e-283	Pericytes	DGKB
0	1.53866	0.974	0.814	0	Pericytes	UACA
0	1.5307	0.893	0.756	0	Pericytes	FAM162B
1.72326e-115	1.51783	0.686	0.515	3.44652e-112	Pericytes	AL356258.1
8.29939e-194	1.51583	0.822	0.612	1.65988e-190	Pericytes	BACH1
1.84244e-187	1.51463	0.798	0.577	3.68488e-184	Pericytes	NHS
0	1.51411	0.915	0.595	0	Pericytes	EPB41L3
0	1.51087	0.917	0.694	0	Pericytes	PPFIBP1
7.49256e-260	1.50757	0.793	0.385	1.49851e-256	Pericytes	EDIL3
0	1.50295	0.947	0.717	0	Pericytes	MYOF
0	1.50121	0.877	0.705	0	Pericytes	COL24A1
3.13451e-253	1.49229	0.888	0.659	6.26902e-250	Pericytes	RASAL2
0	1.49226	0.871	0.658	0	Pericytes	RCSD1
0	1.49175	0.931	0.639	0	Pericytes	ABCA9
1.51165e-300	1.48656	0.955	0.751	3.0233e-297	Pericytes	VCL
0	1.47931	0.911	0.381	0	Pericytes	LBH
0	1.46938	0.887	0.747	0	Pericytes	PLA2R1
0	1.46778	0.899	0.709	0	Pericytes	GPER1
1.93571e-235	1.46296	0.868	0.596	3.87142e-232	Pericytes	CENPP
1.8058e-178	1.45875	0.843	0.792	3.6116e-175	Pericytes	SH3RF1
0	1.45011	0.892	0.501	0	Pericytes	RBM20
0	1.44805	0.875	0.533	0	Pericytes	LPL
0	1.44715	0.902	0.609	0	Pericytes	NTN4
0	1.44707	0.907	0.607	0	Pericytes	ADGRF5
2.81603e-245	1.44195	0.776	0.437	5.63206e-242	Pericytes	GUCY1A1
0	1.43771	0.909	0.626	0	Pericytes	STARD8
0	1.41988	0.946	0.446	0	Pericytes	COL1A2
5.55118e-218	1.40888	0.954	0.649	1.11024e-214	Pericytes	GPC6
0	1.40568	0.949	0.607	0	Pericytes	PRKCH
7.77927e-254	1.39829	0.888	0.747	1.55585e-250	Pericytes	ZIC1
0	1.38346	0.946	0.457	0	Pericytes	C11orf96
0	1.36814	0.941	0.698	0	Pericytes	TTLL7
1.36995e-197	1.35762	0.932	0.745	2.7399e-194	Pericytes	PDE3A
1.35935e-231	1.33376	0.851	0.584	2.71869e-228	Pericytes	L3MBTL4
5.0099e-246	1.32385	0.914	0.649	1.00198e-242	Pericytes	XKR6
7.24601e-198	1.32221	0.854	0.734	1.4492e-194	Pericytes	LIN7A
1.5954e-266	1.29016	0.974	0.816	3.1908e-263	Pericytes	SH3D19
0	1.28995	0.883	0.659	0	Pericytes	MTSS1
2.13372e-188	1.28337	0.902	0.744	4.26744e-185	Pericytes	PTN
0	1.28166	0.899	0.731	0	Pericytes	COL6A2
0	1.27659	0.929	0.744	0	Pericytes	APOLD1
0	1.26973	0.913	0.549	0	Pericytes	RERGL
1.4247e-236	1.26722	0.818	0.587	2.8494e-233	Pericytes	ADGRL2
3.82919e-121	1.26596	0.776	0.634	7.65837e-118	Pericytes	DYNC1I1
9.02958e-251	1.25285	0.868	0.619	1.80592e-247	Pericytes	NID1
0	1.24771	0.868	0.709	0	Pericytes	KITLG
0	1.24592	0.979	0.681	0	Pericytes	H3F3B
2.14437e-282	1.24092	0.853	0.651	4.28874e-279	Pericytes	TGFBR2
0	1.23969	0.95	0.721	0	Pericytes	ROR1
0	1.23794	0.95	0.557	0	Pericytes	PDE2A
1.06808e-156	1.2374	0.778	0.536	2.13616e-153	Pericytes	CCDC102B
3.43231e-230	1.23345	0.902	0.734	6.86462e-227	Pericytes	EVA1C
5.02333e-233	1.23103	0.977	0.781	1.00467e-229	Pericytes	GHR
0	1.23073	0.921	0.716	0	Pericytes	TRPC6
1.11108e-50	1.22833	0.651	0.534	2.22216e-47	Pericytes	OPCML
9.80718e-285	1.20261	0.812	0.686	1.96144e-281	Pericytes	CA4
0	1.19938	0.831	0.503	0	Pericytes	FRZB
4.33195e-212	1.19879	0.739	0.344	8.6639e-209	Pericytes	CNTN6
1.01343e-303	1.19519	0.835	0.732	2.02687e-300	Pericytes	PRELP
3.20815e-295	1.18895	0.892	0.71	6.41631e-292	Pericytes	KLF6
0	1.18035	0.914	0.675	0	Pericytes	MCAM
0	1.17824	0.882	0.591	0	Pericytes	TBX3
0	1.17796	0.838	0.628	0	Pericytes	HIGD1B
9.45165e-261	1.15738	0.837	0.639	1.89033e-257	Pericytes	CA2
1.42515e-270	1.15366	0.937	0.604	2.85031e-267	Pericytes	ELOVL5
5.15916e-234	1.14704	0.776	0.774	1.03183e-230	Pericytes	CSPG4
0	1.14495	0.81	0.526	0	Pericytes	PLAC9
2.22837e-144	1.14092	0.874	0.735	4.45673e-141	Pericytes	STK39
0	1.13867	0.917	0.718	0	Pericytes	PLCL2
8.74373e-145	1.1333	0.717	0.625	1.74875e-141	Pericytes	NEURL1B
2.21636e-183	1.11397	0.93	0.826	4.43272e-180	Pericytes	RAPGEF1
1.62447e-139	1.10507	0.874	0.726	3.24895e-136	Pericytes	MAML3
0	1.10102	0.889	0.655	0	Pericytes	KCNE4
0	1.09919	0.911	0.22	0	Pericytes	RGS4
1.63433e-272	1.09631	0.797	0.513	3.26866e-269	Pericytes	ANO3
0	1.09513	0.943	0.702	0	Pericytes	XAF1
0	1.09369	0.868	0.585	0	Pericytes	KCNAB1
0	1.09089	0.871	0.677	0	Pericytes	ITGA10
0	1.07272	0.951	0.554	0	Pericytes	ACTA2
2.95169e-167	1.06432	0.753	0.778	5.90338e-164	Pericytes	TBX18
1.01033e-36	1.0605	0.677	0.803	2.02066e-33	Pericytes	DISC1
0	1.05922	0.923	0.538	0	Pericytes	KCNS3
0	1.05427	0.912	0.589	0	Pericytes	TMOD1
9.70625e-248	1.0369	0.85	0.571	1.94125e-244	Pericytes	SLC38A2
2.42875e-48	1.03645	0.646	0.468	4.85749e-45	Pericytes	AC007319.1
0	1.02933	0.874	0.552	0	Pericytes	HIF1A-AS2
0	1.02551	0.939	0.614	0	Pericytes	SCARB1
1.73258e-220	1.02329	0.857	0.756	3.46517e-217	Pericytes	TSPAN9
3.22456e-230	1.02301	0.895	0.642	6.44911e-227	Pericytes	RNLS
6.74352e-78	0.992456	0.688	0.798	1.3487e-74	Pericytes	KANK3
4.21249e-92	0.985045	0.708	0.703	8.42498e-89	Pericytes	NKD1
0	0.979298	0.877	0.551	0	Pericytes	B2M
4.66393e-184	0.969928	0.747	0.586	9.32787e-181	Pericytes	CYTOR
5.62564e-277	0.961455	0.839	0.58	1.12513e-273	Pericytes	SLC2A13
0	0.957626	0.922	0.596	0	Pericytes	SLIT3
2.47736e-172	0.953554	0.871	0.707	4.95472e-169	Pericytes	MTRNR2L12
4.0706e-173	0.947891	0.745	0.723	8.14119e-170	Pericytes	NOSTRIN
1.02679e-93	0.944533	0.913	0.936	2.05358e-90	Pericytes	COLEC12
8.27095e-192	0.925766	0.923	0.629	1.65419e-188	Pericytes	SETBP1
0	0.92358	0.898	0.636	0	Pericytes	COL4A1
1.99535e-11	0.922718	0.574	0.517	3.9907e-08	Pericytes	IL1RAPL1
0	0.918169	0.889	0.573	0	Pericytes	WDFY4
3.82543e-256	0.917967	0.983	0.752	7.65085e-253	Pericytes	CRIM1
3.16116e-116	0.917365	0.691	0.601	6.32231e-113	Pericytes	OBSCN
0	0.91541	0.88	0.544	0	Pericytes	CAV1
4.87712e-127	0.906756	0.698	0.632	9.75424e-124	Pericytes	ANPEP
2.12857e-243	0.900161	0.828	0.529	4.25714e-240	Pericytes	GULP1
6.07207e-195	0.889477	0.853	0.537	1.21441e-191	Pericytes	PPM1E
8.88129e-226	0.880833	0.871	0.539	1.77626e-222	Pericytes	LRCH1
6.47895e-249	0.874947	0.779	0.545	1.29579e-245	Pericytes	MYL9
3.88323e-304	0.872365	0.865	0.656	7.76647e-301	Pericytes	EPSTI1
4.48394e-109	0.868156	0.913	0.732	8.96788e-106	Pericytes	RAPGEF2
2.657e-214	0.868026	0.946	0.838	5.314e-211	Pericytes	STK24
0	0.867287	0.899	0.771	0	Pericytes	FAM129A
0	0.865289	0.826	0.584	0	Pericytes	SMIM3
0	0.858247	0.849	0.666	0	Pericytes	TNFRSF21
0	0.85592	0.971	0.709	0	Pericytes	ANKRD33B
0	0.846536	0.936	0.746	0	Pericytes	ITGA4
0	0.845983	0.905	0.515	0	Pericytes	SVIL
1.43081e-283	0.844966	0.892	0.755	2.86163e-280	Pericytes	AL445472.1
0	0.833944	0.937	0.569	0	Pericytes	SLIT2
1.23125e-203	0.830716	0.756	0.516	2.46251e-200	Pericytes	FAM241A
0	0.828634	0.943	0.772	0	Pericytes	GLYATL2
7.96501e-43	0.826291	0.6	0.428	1.593e-39	Pericytes	LINC02172
9.17382e-42	0.820319	0.778	0.738	1.83476e-38	Pericytes	PID1
0	0.817656	0.834	0.483	0	Pericytes	GALNT14
4.91845e-216	0.815882	0.783	0.718	9.8369e-213	Pericytes	TP63
2.82608e-291	0.805582	0.894	0.703	5.65217e-288	Pericytes	ABTB2
1.66481e-140	0.784615	0.753	0.538	3.32962e-137	Pericytes	ZEB1-AS1
2.77573e-96	0.778193	0.714	0.611	5.55146e-93	Pericytes	SP100
0	0.777264	0.873	0.551	0	Pericytes	MIR181A1HG
4.52759e-232	0.770666	0.896	0.773	9.05518e-229	Pericytes	JAM3
0	0.768073	0.975	0.747	0	Pericytes	PLD5
1.71319e-285	0.763725	0.838	0.629	3.42639e-282	Pericytes	DENND3
2.70702e-262	0.758229	0.839	0.447	5.41403e-259	Pericytes	CNTNAP5
0	0.753932	0.956	0.62	0	Pericytes	ISM1
1.09713e-278	0.750958	0.922	0.794	2.19425e-275	Pericytes	FBLN1
2.38152e-116	0.748923	0.982	0.936	4.76305e-113	Pericytes	GPC5
0	0.74239	0.883	0.722	0	Pericytes	IRAK3
1.28323e-134	0.741012	0.92	0.656	2.56646e-131	Pericytes	TSC22D1
0	0.738069	0.922	0.367	0	Pericytes	AL450442.1
1.85944e-25	0.729891	0.637	0.666	3.71888e-22	Pericytes	NHSL2
5.17517e-73	0.727416	0.844	0.763	1.03503e-69	Pericytes	CERS6
0	0.72457	0.841	0.75	0	Pericytes	LRRC32
4.64856e-69	0.723668	0.929	0.832	9.29713e-66	Pericytes	BBS9
8.81398e-171	0.723166	0.723	0.569	1.7628e-167	Pericytes	TINAGL1
0	0.718586	0.883	0.472	0	Pericytes	TNFAIP8
0	0.708115	0.96	0.694	0	Pericytes	RAI2
1.02932e-36	0.702524	0.802	0.762	2.05865e-33	Pericytes	MGAT5
0	0.702145	0.92	0.752	0	Pericytes	AL133346.1
1.33066e-61	0.695291	0.641	0.537	2.66131e-58	Pericytes	ENPEP
2.13675e-65	0.692725	0.671	0.578	4.2735e-62	Pericytes	DSCAML1
1.44613e-25	0.689103	0.595	0.39	2.89226e-22	Pericytes	AFAP1L2
6.27659e-141	0.683812	0.965	0.701	1.25532e-137	Pericytes	SLC35F1
6.37633e-270	0.675229	0.862	0.528	1.27527e-266	Pericytes	SORCS1
6.15684e-06	0.668256	0.535	0.573	0.0123137	Pericytes	STAT4
6.2999e-97	0.667624	0.8	0.667	1.25998e-93	Pericytes	GBE1
1.47917e-110	0.664199	0.856	0.599	2.95834e-107	Pericytes	CTNNA3
3.39217e-51	0.66246	0.743	0.654	6.78434e-48	Pericytes	AFF3
7.38057e-43	0.660326	0.645	0.455	1.47611e-39	Pericytes	RAPGEF4
0	0.659001	0.875	0.481	0	Pericytes	APOD
1.90954e-117	0.652871	0.768	0.644	3.81908e-114	Pericytes	KLHL29
7.83343e-225	0.644728	0.842	0.531	1.56669e-221	Pericytes	PRR16
1.11514e-180	0.627951	0.953	0.699	2.23029e-177	Pericytes	MKL2
5.54813e-221	0.610032	0.844	0.635	1.10963e-217	Pericytes	RARB
7.19934e-59	0.606301	0.833	0.656	1.43987e-55	Pericytes	ROBO2
0	0.605648	0.832	0.536	0	Pericytes	GNG11
5.94012e-198	0.604871	0.943	0.842	1.18802e-194	Pericytes	GPCPD1
7.0148e-300	0.601626	0.817	0.546	1.40296e-296	Pericytes	TMEM204
3.01892e-90	0.599272	0.659	0.495	6.03785e-87	Pericytes	DLEU7
0	0.599102	0.931	0.445	0	Pericytes	EMCN
3.1716e-263	0.597794	0.841	0.693	6.34321e-260	Pericytes	DNAH11
4.04816e-258	0.594859	0.886	0.73	8.09632e-255	Pericytes	RASGRF2
1.66514e-11	0.592139	0.568	0.551	3.33027e-08	Pericytes	AC019197.1
1.23069e-41	0.591122	0.798	0.773	2.46139e-38	Pericytes	POU6F2
8.02489e-53	0.590258	0.946	0.856	1.60498e-49	Pericytes	TIMP3
1.2048e-63	0.576616	0.671	0.775	2.40961e-60	Pericytes	TBX15
0	0.567868	0.862	0.536	0	Pericytes	NEDD9
0	0.562766	0.854	0.791	0	Pericytes	NID2
0	0.559349	0.871	0.523	0	Pericytes	FRAS1
1.77607e-142	0.554081	0.911	0.836	3.55214e-139	Pericytes	SORBS2
5.00385e-35	0.553914	0.691	0.719	1.00077e-31	Pericytes	HEYL
7.57259e-174	0.553409	0.753	0.656	1.51452e-170	Pericytes	PRLR
2.40001e-247	0.546705	0.842	0.421	4.80002e-244	Pericytes	FGF12
6.18388e-176	0.540252	0.854	0.72	1.23678e-172	Pericytes	NUAK1
8.30011e-297	0.538314	0.88	0.58	1.66002e-293	Pericytes	DOCK8
2.55148e-137	0.536746	0.768	0.702	5.10297e-134	Pericytes	TBL1Y
5.34815e-151	0.533896	0.745	0.463	1.06963e-147	Pericytes	ABCA10
0	0.533509	0.888	0.279	0	Pericytes	RUNX3
6.33107e-120	0.530868	0.847	0.605	1.26621e-116	Pericytes	AGFG1
2.02606e-32	0.527857	0.647	0.556	4.05213e-29	Pericytes	AC090568.2
8.25165e-103	0.524714	0.684	0.475	1.65033e-99	Pericytes	CSF1R
7.79351e-267	0.52115	0.764	0.344	1.5587e-263	Pericytes	GABRB2
0	0.515069	0.968	0.579	0	Pericytes	MYOCD
1.6624e-104	0.513774	0.779	0.545	3.32481e-101	Pericytes	SPRY4-AS1
1.05853e-108	0.513622	0.821	0.743	2.11705e-105	Pericytes	TPM4
8.40354e-62	0.509492	0.698	0.593	1.68071e-58	Pericytes	TBC1D4
0	0.504254	0.859	0.57	0	Pericytes	AC105094.2
9.32697e-84	0.498685	0.771	0.708	1.86539e-80	Pericytes	FAM107B
3.01901e-156	0.49679	0.757	0.491	6.03801e-153	Pericytes	RUNX2
6.8536e-11	0.496103	0.627	0.626	1.37072e-07	Pericytes	FOXP2
1.86193e-97	0.4855	0.674	0.552	3.72386e-94	Pericytes	ESAM
7.11206e-19	0.483711	0.602	0.484	1.42241e-15	Pericytes	MMP16
0	0.47854	0.91	0.565	0	Pericytes	DACH2
5.79563e-145	0.474311	0.738	0.535	1.15913e-141	Pericytes	AC092958.1
3.42852e-293	0.47326	0.79	0.534	6.85704e-290	Pericytes	LINC02408
1.32846e-110	0.467377	0.725	0.558	2.65692e-107	Pericytes	CDK6
2.68923e-141	0.464867	0.832	0.634	5.37845e-138	Pericytes	EDA
1.21564e-28	0.462831	0.625	0.624	2.43127e-25	Pericytes	FAR2
1.69811e-128	0.457676	0.902	0.582	3.39621e-125	Pericytes	LRFN5
2.21047e-270	0.455253	0.85	0.631	4.42094e-267	Pericytes	ARHGAP15
6.21021e-38	0.454405	0.819	0.833	1.24204e-34	Pericytes	SLC22A23
2.82007e-129	0.451607	0.731	0.721	5.64014e-126	Pericytes	SH2D3C
4.56759e-114	0.444078	0.868	0.664	9.13517e-111	Pericytes	CTNNB1
2.59129e-60	0.442978	0.895	0.807	5.18258e-57	Pericytes	TPM1
4.64903e-89	0.442816	0.711	0.657	9.29805e-86	Pericytes	LYN
5.8412e-284	0.442275	0.856	0.526	1.16824e-280	Pericytes	HLA-B
0	0.442054	0.932	0.702	0	Pericytes	JCAD
0	0.435207	0.935	0.482	0	Pericytes	BMPER
2.42108e-77	0.433395	0.926	0.725	4.84215e-74	Pericytes	LINC00894
1.56358e-66	0.432246	0.681	0.768	3.12716e-63	Pericytes	AC002066.1
4.09434e-135	0.422588	0.69	0.366	8.18868e-132	Pericytes	AC113383.1
0	0.420384	0.927	0.5	0	Pericytes	ARHGAP20
0	0.41676	0.89	0.62	0	Pericytes	FOXQ1
8.03983e-10	0.416181	0.965	0.902	1.60797e-06	Pericytes	SMYD3
1.5829e-43	0.413707	0.709	0.621	3.16581e-40	Pericytes	SLC22A3
1.841e-30	0.408025	0.79	0.78	3.682e-27	Pericytes	GMDS
3.66395e-161	0.406385	0.798	0.704	7.32789e-158	Pericytes	VIM
9.67443e-45	0.405301	0.734	0.73	1.93489e-41	Pericytes	HLF
1.00209e-155	0.402321	0.711	0.519	2.00419e-152	Pericytes	SLC6A17
0	0.399778	0.851	0.436	0	Pericytes	ABCA6
6.47623e-185	0.397931	0.733	0.383	1.29525e-181	Pericytes	GABRE
3.4846e-261	0.394085	0.782	0.674	6.96919e-258	Pericytes	NPY1R
2.98461e-69	0.39192	0.693	0.588	5.96923e-66	Pericytes	SLC2A3
1.61363e-26	0.390416	0.737	0.685	3.22727e-23	Pericytes	SLCO3A1
1.17875e-32	0.390371	0.608	0.551	2.35751e-29	Pericytes	CMTM8
3.16311e-43	0.384687	0.79	0.796	6.32622e-40	Pericytes	NXN
1.40443e-62	0.382452	0.7	0.649	2.80885e-59	Pericytes	COL18A1
2.33288e-95	0.381544	0.782	0.594	4.66576e-92	Pericytes	DOCK9
3.02521e-06	0.380556	0.488	0.587	0.00605042	Pericytes	GCNT2
1.77763e-15	0.377922	0.635	0.721	3.55526e-12	Pericytes	IL1R1
8.81268e-252	0.354862	0.796	0.586	1.76254e-248	Pericytes	FOXC1
0	0.343207	0.869	0.606	0	Pericytes	TIMP1
5.32874e-48	0.341705	0.853	0.712	1.06575e-44	Pericytes	MAN2A1
1.69979e-05	0.34106	0.5	0.606	0.0339958	Pericytes	PDE1A
3.66676e-119	0.339321	0.744	0.762	7.33352e-116	Pericytes	TRABD2B
1.86102e-131	0.330529	0.723	0.567	3.72204e-128	Pericytes	COL14A1
0	0.318384	0.951	0.32	0	Pericytes	IGFBP6
2.62549e-31	0.314226	0.928	0.946	5.25098e-28	Pericytes	FOXP1
1.13157e-302	0.312949	0.827	0.578	2.26314e-299	Pericytes	ASPN
2.72716e-90	0.310134	0.97	0.826	5.45432e-87	Pericytes	PLPP1
1.56809e-103	0.296119	0.793	0.605	3.13619e-100	Pericytes	SRGAP2
4.01023e-145	0.294434	0.924	0.779	8.02047e-142	Pericytes	ACVR1
6.08099e-26	0.294255	0.929	0.823	1.2162e-22	Pericytes	MEF2A
4.24389e-202	0.289329	0.835	0.616	8.48777e-199	Pericytes	ATP8B1
2.46397e-11	0.282975	0.547	0.434	4.92793e-08	Pericytes	AL050403.2
8.88428e-33	0.280549	0.841	0.757	1.77686e-29	Pericytes	AC008014.1
1.15108e-57	0.278976	0.752	0.603	2.30216e-54	Pericytes	MSN
0	0.268988	0.921	0.675	0	Pericytes	ARRDC4
1.86682e-68	0.265659	0.692	0.497	3.73363e-65	Pericytes	CALCRL
0	0.262819	0.959	0.555	0	Pericytes	KANK4
1.18907e-101	0.262569	0.814	0.54	2.37815e-98	Pericytes	PTMA
2.78653e-24	0.260279	0.569	0.417	5.57307e-21	Pericytes	KHDRBS2
1.02499e-20	0.258714	0.676	0.713	2.04999e-17	Pericytes	CPED1
1.09509e-196	0.253795	0.802	0.589	2.19017e-193	Pericytes	ENG
1.17478e-145	0.250733	0.804	0.663	2.34956e-142	Pericytes	ABCA8

## Sheet: SMCs
p_val	avg_log2FC	pct.1	pct.2	p_val_adj	cluster	gene
0	4.91527	0.988	0.664	0	SMCs	MYH11
1.21634e-298	4.46768	0.975	0.601	2.43269e-295	SMCs	SLIT3
5.04853e-288	4.3805	0.983	0.639	1.00971e-284	SMCs	COL4A1
2.47632e-270	3.93184	0.969	0.773	4.95264e-267	SMCs	CRISPLD2
3.45039e-256	3.61982	0.952	0.575	6.90079e-253	SMCs	RCAN2
8.89298e-253	3.59974	0.988	0.805	1.7786e-249	SMCs	RBPMS
2.05816e-264	3.45063	0.988	0.627	4.11632e-261	SMCs	ARHGAP10
1.15398e-289	3.41645	0.969	0.554	2.30796e-286	SMCs	ADAMTS1
2.71254e-236	3.40051	0.933	0.579	5.42508e-233	SMCs	RNF152
5.95638e-265	3.31187	0.996	0.853	1.19128e-261	SMCs	CALD1
2.35927e-258	3.23067	0.985	0.743	4.71855e-255	SMCs	TPM4
9.05739e-298	3.17188	0.969	0.559	1.81148e-294	SMCs	ACTA2
5.19522e-248	3.15975	0.985	0.845	1.03904e-244	SMCs	EBF1
1.90948e-260	3.0439	0.992	0.884	3.81897e-257	SMCs	PRKG1
4.4714e-201	2.99262	0.977	0.837	8.94279e-198	SMCs	DMD
6.86651e-221	2.9598	0.967	0.634	1.3733e-217	SMCs	INPP4B
1.21281e-183	2.93242	0.927	0.72	2.42562e-180	SMCs	NR4A1
3.47605e-241	2.90651	0.963	0.637	6.95211e-238	SMCs	ARHGAP6
2.75281e-246	2.9006	0.933	0.678	5.50561e-243	SMCs	MCAM
2.53766e-220	2.84585	0.963	0.707	5.07533e-217	SMCs	AKAP12
1.22683e-181	2.83237	0.977	0.911	2.45366e-178	SMCs	ZFHX3
1.37944e-189	2.79747	0.954	0.632	2.75887e-186	SMCs	SETBP1
1.03189e-218	2.7901	0.987	0.875	2.06378e-215	SMCs	CACNA1C
5.07376e-234	2.78137	0.913	0.602	1.01475e-230	SMCs	FHL5
9.02529e-186	2.72938	0.881	0.614	1.80506e-182	SMCs	CARMN
3.22771e-160	2.69287	0.865	0.589	6.45542e-157	SMCs	KCNAB1
2.23859e-194	2.68283	0.946	0.63	4.47718e-191	SMCs	COL4A2
4.07597e-184	2.68151	0.985	0.882	8.15195e-181	SMCs	EPS8
5.65796e-167	2.67319	0.931	0.748	1.13159e-163	SMCs	PDE3A
2.34389e-219	2.62379	0.919	0.532	4.68779e-216	SMCs	ITGA8
2.17122e-189	2.58069	0.958	0.668	4.34244e-186	SMCs	ESYT2
5.18066e-186	2.5745	0.987	0.861	1.03613e-182	SMCs	NR2F2-AS1
8.30597e-63	2.50186	0.985	0.879	1.66119e-59	SMCs	PDE4D
2.53189e-253	2.50185	0.95	0.643	5.06379e-250	SMCs	NOTCH3
3.96425e-224	2.49503	0.969	0.65	7.92849e-221	SMCs	DLC1
5.98992e-231	2.45194	0.95	0.729	1.19798e-227	SMCs	JAG1
1.1959e-290	2.43139	0.975	0.562	2.39181e-287	SMCs	SMOC2
3.56922e-222	2.4294	0.975	0.789	7.13844e-219	SMCs	GRK5
3.81119e-193	2.4275	0.969	0.673	7.62238e-190	SMCs	CASC15
1.40612e-158	2.41422	0.861	0.485	2.81224e-155	SMCs	RYR2
9.24999e-165	2.41323	0.981	0.654	1.85e-161	SMCs	GPC6
1.92571e-237	2.39733	0.96	0.651	3.85143e-234	SMCs	NCALD
1.51766e-250	2.31945	0.961	0.619	3.03531e-247	SMCs	CLSTN2
1.72291e-195	2.31315	0.892	0.384	3.44582e-192	SMCs	PDE5A
2.04396e-147	2.30783	0.832	0.576	4.08792e-144	SMCs	SLC38A11
1.75077e-183	2.30172	0.904	0.643	3.50154e-180	SMCs	PHLDB2
8.29136e-213	2.28767	0.96	0.52	1.65827e-209	SMCs	SVIL
1.00933e-208	2.24077	0.946	0.55	2.01867e-205	SMCs	GRIN2A
1.87235e-123	2.23049	0.817	0.601	3.74469e-120	SMCs	PDE1A
5.00873e-236	2.20945	0.952	0.638	1.00175e-232	SMCs	SH3KBP1
1.67717e-187	2.17088	0.882	0.585	3.35434e-184	SMCs	MYOCD
1.19373e-153	2.16292	0.969	0.844	2.38746e-150	SMCs	TACC1
7.94148e-165	2.15801	0.884	0.627	1.5883e-161	SMCs	CCDC3
2.63236e-249	2.15046	0.942	0.537	5.26472e-246	SMCs	MSC-AS1
3.91853e-147	2.14915	0.983	0.788	7.83706e-144	SMCs	ADAMTS9-AS2
1.97861e-141	2.1312	0.84	0.603	3.95722e-138	SMCs	PIP5K1B
9.22068e-169	2.11917	0.919	0.571	1.84414e-165	SMCs	ACTN4
7.9997e-183	2.11557	0.958	0.654	1.59994e-179	SMCs	MYH9
1.49687e-136	2.10522	0.921	0.756	2.99375e-133	SMCs	CRIM1
3.51098e-116	2.09132	0.95	0.918	7.02196e-113	SMCs	SSBP3
1.55423e-150	2.07671	0.95	0.835	3.10847e-147	SMCs	SH3RF3
1.48268e-153	2.03274	0.965	0.796	2.96535e-150	SMCs	PTPRG
5.96386e-198	2.0207	0.892	0.469	1.19277e-194	SMCs	FILIP1
3.62713e-126	2.01461	0.888	0.837	7.25426e-123	SMCs	SORBS2
1.77304e-208	2.01282	0.927	0.485	3.54607e-205	SMCs	FRMD3
2.72474e-129	2.00992	0.829	0.704	5.44949e-126	SMCs	LMOD1
3.19807e-122	1.95517	0.802	0.569	6.39613e-119	SMCs	COL14A1
8.02915e-126	1.94571	0.836	0.534	1.60583e-122	SMCs	OPCML
6.41519e-113	1.9376	0.877	0.602	1.28304e-109	SMCs	CTNNA3
5.88414e-163	1.92044	0.861	0.761	1.17683e-159	SMCs	TRABD2B
1.91044e-115	1.88158	0.869	0.611	3.82089e-112	SMCs	SDK1
3.16753e-140	1.87688	0.915	0.7	6.33507e-137	SMCs	SYNE2
1.55741e-102	1.84563	0.829	0.58	3.11482e-99	SMCs	NHS
1.85556e-92	1.83964	0.877	0.768	3.71111e-89	SMCs	PLCL1
1.12461e-204	1.82545	0.944	0.649	2.24922e-201	SMCs	SEMA5A
8.59866e-97	1.82392	0.83	0.768	1.71973e-93	SMCs	CLMN
1.718e-165	1.8083	0.844	0.479	3.436e-162	SMCs	LDB3
4.91394e-74	1.80796	0.765	0.688	9.82788e-71	SMCs	MYO1D
2.84413e-85	1.78811	0.921	0.797	5.68825e-82	SMCs	ELL2
9.89037e-141	1.78703	0.892	0.603	1.97807e-137	SMCs	CDH6
3.29805e-183	1.77364	0.904	0.443	6.5961e-180	SMCs	CHSY3
9.28358e-102	1.77259	0.888	0.795	1.85672e-98	SMCs	NXN
3.67919e-126	1.75497	0.855	0.677	7.35839e-123	SMCs	COBLL1
1.46581e-115	1.73798	0.811	0.521	2.93162e-112	SMCs	DGKH
2.19838e-129	1.70832	0.813	0.391	4.39676e-126	SMCs	EDIL3
2.28802e-76	1.68902	0.844	0.755	4.57604e-73	SMCs	APBB2
4.43375e-163	1.65241	0.863	0.536	8.8675e-160	SMCs	EDNRA
3.77447e-88	1.6409	0.794	0.518	7.54894e-85	SMCs	UNC5C
8.60129e-187	1.62253	0.925	0.646	1.72026e-183	SMCs	RFTN1
8.5823e-77	1.59834	0.753	0.766	1.71646e-73	SMCs	AC002066.1
2.421e-168	1.57751	0.911	0.594	4.84199e-165	SMCs	TMOD1
5.41081e-56	1.57604	0.827	0.728	1.08216e-52	SMCs	SLC8A1
1.17002e-98	1.5494	0.825	0.711	2.34003e-95	SMCs	CPED1
7.89862e-136	1.54763	0.861	0.676	1.57972e-132	SMCs	FOSL2
1.29694e-67	1.54487	0.751	0.774	2.59389e-64	SMCs	FAM129A
3.25035e-99	1.52058	0.813	0.721	6.5007e-96	SMCs	ITGA1
8.96503e-127	1.52044	0.963	0.736	1.79301e-123	SMCs	STK39
7.78297e-180	1.52039	0.908	0.588	1.55659e-176	SMCs	SLC2A3
9.82619e-41	1.51882	0.763	0.701	1.96524e-37	SMCs	ATP1B3
2.60784e-65	1.48579	0.732	0.777	5.21567e-62	SMCs	TBX18
4.39941e-123	1.47622	0.933	0.786	8.79882e-120	SMCs	FLNB
9.3129e-40	1.47404	0.782	0.729	1.86258e-36	SMCs	MAML3
1.01748e-125	1.45746	0.842	0.734	2.03496e-122	SMCs	ATF3
6.3768e-81	1.44135	0.884	0.662	1.27536e-77	SMCs	RASAL2
1.05731e-92	1.42014	0.956	0.798	2.11461e-89	SMCs	CLIC4
6.33427e-97	1.40394	0.815	0.619	1.26685e-93	SMCs	ATP8B1
1.26351e-86	1.38773	0.811	0.717	2.52701e-83	SMCs	HEYL
3.54961e-70	1.37864	0.796	0.588	7.09923e-67	SMCs	L3MBTL4
1.0996e-72	1.37852	0.802	0.703	2.1992e-69	SMCs	TTLL7
1.95119e-112	1.36622	0.838	0.691	3.90238e-109	SMCs	MIR4435-2HG
8.02667e-67	1.36383	0.881	0.754	1.60533e-63	SMCs	VCL
1.6258e-61	1.35554	0.881	0.746	3.25159e-58	SMCs	SYNPO2
9.36158e-32	1.35154	0.95	0.857	1.87232e-28	SMCs	TIMP3
5.41911e-224	1.35146	0.911	0.57	1.08382e-220	SMCs	DACH2
6.63639e-88	1.33702	0.884	0.629	1.32728e-84	SMCs	RBMS1
1.93828e-35	1.33398	0.963	0.944	3.87655e-32	SMCs	IGF1R
1.13451e-161	1.33261	0.871	0.715	2.26902e-158	SMCs	LINC01197
4.06042e-81	1.33214	0.921	0.808	8.12083e-78	SMCs	TPM1
2.52344e-54	1.31554	0.757	0.686	5.04689e-51	SMCs	ACTN1
1.19799e-265	1.31285	0.934	0.685	2.39599e-262	SMCs	CNN1
1.32122e-43	1.26836	0.692	0.616	2.64244e-40	SMCs	NTN4
6.42309e-133	1.26537	0.913	0.721	1.28462e-129	SMCs	MYOF
3.25065e-76	1.26201	0.877	0.657	6.5013e-73	SMCs	PLCB4
4.04656e-97	1.25339	0.815	0.533	8.09311e-94	SMCs	GULP1
4.43097e-37	1.25038	0.73	0.636	8.86194e-34	SMCs	DYNC1I1
1.57498e-217	1.24743	0.96	0.568	3.14996e-214	SMCs	ITGA9
3.43187e-112	1.24196	0.79	0.465	6.86374e-109	SMCs	C11orf96
5.69884e-115	1.23634	0.821	0.528	1.13977e-111	SMCs	PDE1C
1.58228e-115	1.23301	0.854	0.722	3.16456e-112	SMCs	PLCL2
2.30153e-197	1.23198	0.894	0.69	4.60306e-194	SMCs	SEMA5B
8.87269e-113	1.22718	0.811	0.701	1.77454e-109	SMCs	TBX2
2.46453e-47	1.22628	0.83	0.586	4.92906e-44	SMCs	NLGN1
5.07986e-171	1.22359	0.931	0.748	1.01597e-167	SMCs	PLA2R1
2.36429e-133	1.22327	0.917	0.696	4.72859e-130	SMCs	ARHGAP29
3.13039e-137	1.21588	0.861	0.734	6.26079e-134	SMCs	COL6A2
5.67115e-64	1.2157	0.819	0.609	1.13423e-60	SMCs	DIAPH2
4.38608e-74	1.21322	0.769	0.703	8.77217e-71	SMCs	MYO1B
3.73522e-48	1.20474	0.724	0.761	7.47044e-45	SMCs	KIRREL1
8.11049e-108	1.19802	0.788	0.626	1.6221e-104	SMCs	NEURL1B
3.11069e-96	1.18832	0.786	0.609	6.22138e-93	SMCs	NR4A3
3.85295e-20	1.17705	0.699	0.763	7.7059e-17	SMCs	FBXO32
2.88287e-156	1.17652	0.923	0.713	5.76575e-153	SMCs	KCNT2
1.23005e-146	1.17402	0.954	0.676	2.4601e-143	SMCs	MGLL
1.98591e-48	1.16505	0.89	0.801	3.97182e-45	SMCs	MYO1E
6.73832e-222	1.15913	0.944	0.65	1.34766e-218	SMCs	LAMA3
1.01413e-258	1.14736	0.927	0.569	2.02826e-255	SMCs	TINAGL1
4.75664e-102	1.12951	0.769	0.649	9.51329e-99	SMCs	CASQ2
3.50584e-258	1.10809	0.961	0.611	7.01168e-255	SMCs	FHL2
3.21028e-175	1.10437	0.904	0.583	6.42056e-172	SMCs	SLC2A13
1.9555e-08	1.10431	0.665	0.737	3.911e-05	SMCs	ZNF331
2.60493e-68	1.09725	0.821	0.758	5.20986e-65	SMCs	TSPAN9
1.73001e-38	1.0882	0.705	0.649	3.46002e-35	SMCs	COL18A1
3.58213e-131	1.08347	0.836	0.557	7.16427e-128	SMCs	IL4R
1.13397e-279	1.08247	0.96	0.668	2.26794e-276	SMCs	SLC14A2-AS1
1.4151e-123	1.0709	0.832	0.618	2.8302e-120	SMCs	ANGPT2
2.44479e-100	1.06582	0.898	0.762	4.88959e-97	SMCs	ERRFI1
2.42678e-124	1.05953	0.884	0.705	4.85356e-121	SMCs	NRP1
1.46804e-97	1.05373	0.786	0.454	2.93607e-94	SMCs	THSD7B
1.69134e-122	1.04696	0.817	0.717	3.38269e-119	SMCs	IGFBP4
4.9584e-48	1.04313	0.911	0.729	9.9168e-45	SMCs	DLEU2
2.18268e-84	1.03602	0.759	0.774	4.36537e-81	SMCs	CSPG4
9.79091e-40	1.0349	0.786	0.675	1.95818e-36	SMCs	PPP1CB
4.76672e-82	1.03407	0.75	0.442	9.53345e-79	SMCs	GUCY1A1
8.35099e-246	1.01942	0.961	0.804	1.6702e-242	SMCs	COL6A3
2.25208e-79	1.01543	0.734	0.548	4.50416e-76	SMCs	MYL9
4.67808e-122	1.00546	0.881	0.644	9.35615e-119	SMCs	KLHL29
1.0126e-32	1.00181	0.819	0.704	2.0252e-29	SMCs	IGFBP7
1.16853e-22	1.0003	0.659	0.55	2.33706e-19	SMCs	CNTN4
3.3027e-77	0.978492	0.807	0.577	6.60539e-74	SMCs	SLC4A7
2.63479e-78	0.976557	0.734	0.491	5.26958e-75	SMCs	GJC1
2.53546e-112	0.971112	0.917	0.622	5.07092e-109	SMCs	NID1
7.09299e-155	0.968811	0.869	0.454	1.4186e-151	SMCs	COL1A2
4.76365e-20	0.963409	0.929	0.908	9.5273e-17	SMCs	IMMP2L
1.28025e-30	0.951982	0.701	0.516	2.56051e-27	SMCs	IL1RAPL1
6.1009e-59	0.951536	0.813	0.557	1.22018e-55	SMCs	FOS
4.66874e-15	0.946536	0.669	0.659	9.33748e-12	SMCs	PRMT9
3.95267e-152	0.945255	0.886	0.547	7.90534e-149	SMCs	RAPGEF5
1.44036e-133	0.944925	0.884	0.643	2.88072e-130	SMCs	NMNAT2
5.37149e-93	0.941135	0.865	0.775	1.0743e-89	SMCs	JAM3
3.82378e-34	0.934426	0.744	0.603	7.64757e-31	SMCs	YBX3
1.2318e-15	0.93321	0.572	0.39	2.46361e-12	SMCs	TEX41
5.30646e-201	0.929883	0.934	0.605	1.06129e-197	SMCs	CFH
1.29485e-77	0.929164	0.908	0.84	2.5897e-74	SMCs	STK24
1.66559e-86	0.914692	0.857	0.662	3.33118e-83	SMCs	ITIH5
7.8676e-143	0.896905	0.921	0.712	1.57352e-139	SMCs	KLF6
1.01073e-215	0.896689	0.906	0.578	2.02147e-212	SMCs	WDFY4
6.37933e-115	0.896275	0.817	0.559	1.27587e-111	SMCs	CDK6
8.45871e-86	0.895428	0.871	0.623	1.69174e-82	SMCs	IQCJ-SCHIP1
1.03421e-50	0.886956	0.855	0.613	2.06843e-47	SMCs	OXR1
2.04309e-29	0.869063	0.865	0.831	4.08618e-26	SMCs	PTEN
8.07461e-67	0.865815	0.829	0.783	1.61492e-63	SMCs	AC092957.1
2.66861e-121	0.865767	0.879	0.575	5.33721e-118	SMCs	SLC38A2
5.10346e-131	0.86401	0.821	0.545	1.02069e-127	SMCs	TGM2
1.48877e-64	0.8566	0.788	0.609	2.97754e-61	SMCs	GEM
5.43417e-91	0.856457	0.873	0.706	1.08683e-87	SMCs	EPB41L4A
5.2341e-51	0.855783	0.696	0.65	1.04682e-47	SMCs	PARM1
1.26704e-54	0.853176	0.723	0.654	2.53407e-51	SMCs	TFPI
3.74052e-65	0.849081	0.775	0.605	7.48105e-62	SMCs	RASSF3
1.32065e-69	0.845692	0.805	0.605	2.64129e-66	SMCs	BACE2
1.92678e-13	0.84553	0.701	0.686	3.85357e-10	SMCs	SLCO3A1
2.85813e-133	0.827295	0.838	0.661	5.71626e-130	SMCs	RCSD1
4.40928e-90	0.822032	0.823	0.66	8.81857e-87	SMCs	COL5A2
5.44778e-202	0.813423	0.936	0.574	1.08956e-198	SMCs	SLIT2
2.18416e-165	0.812442	0.875	0.783	4.36831e-162	SMCs	HMCN1
2.98946e-176	0.812065	0.929	0.801	5.97891e-173	SMCs	COL5A1
8.08736e-19	0.81089	0.796	0.793	1.61747e-15	SMCs	SH3RF1
2.17334e-05	0.802849	0.688	0.815	0.0434668	SMCs	PDGFRB
9.88195e-66	0.802758	0.834	0.668	1.97639e-62	SMCs	CYTH3
8.37986e-83	0.800687	0.8	0.476	1.67597e-79	SMCs	ANK3
1.67826e-78	0.797926	0.908	0.736	3.35652e-75	SMCs	EVA1C
1.54912e-67	0.797456	0.767	0.62	3.09824e-64	SMCs	AC012409.2
3.21589e-197	0.780767	0.908	0.591	6.43177e-194	SMCs	IL34
5.75361e-239	0.777969	0.944	0.781	1.15072e-235	SMCs	COL1A1
1.58477e-133	0.773939	0.827	0.39	3.16954e-130	SMCs	AFAP1L2
2.22817e-125	0.770462	0.879	0.755	4.45634e-122	SMCs	AL133346.1
9.37333e-104	0.768052	0.923	0.888	1.87467e-100	SMCs	LINC00854
1.93188e-23	0.762695	0.925	0.914	3.86376e-20	SMCs	CACNB2
2.46574e-112	0.74585	0.852	0.717	4.93149e-109	SMCs	HES4
1.28767e-186	0.738979	0.881	0.74	2.57534e-183	SMCs	LINC00924
4.20161e-14	0.737266	0.915	0.848	8.40322e-11	SMCs	EXT1
4.02845e-12	0.733185	0.692	0.616	8.0569e-09	SMCs	BACH1
6.0187e-41	0.727426	0.694	0.549	1.20374e-37	SMCs	A2M
2.17269e-182	0.726318	0.875	0.658	4.34538e-179	SMCs	STAC
4.10861e-56	0.723783	0.699	0.48	8.21723e-53	SMCs	TNFAIP8
1.26798e-159	0.723552	0.842	0.389	2.53596e-156	SMCs	LBH
9.92077e-52	0.722035	0.811	0.725	1.98415e-48	SMCs	FBXL2
4.26317e-67	0.721237	0.825	0.723	8.52634e-64	SMCs	NUAK1
8.79121e-22	0.713442	0.617	0.457	1.75824e-18	SMCs	RGS7BP
5.20822e-100	0.708181	0.84	0.638	1.04164e-96	SMCs	RARB
5.7726e-236	0.698417	0.904	0.496	1.15452e-232	SMCs	LINC02398
5.43404e-39	0.698256	0.721	0.703	1.08681e-35	SMCs	NKD1
4.66893e-10	0.692948	0.686	0.635	9.33786e-07	SMCs	COL8A1
1.41517e-60	0.683021	0.769	0.644	2.83033e-57	SMCs	SH3BP5
2.42012e-252	0.681247	0.911	0.363	4.84024e-249	SMCs	AJAP1
5.78499e-23	0.676102	0.857	0.828	1.157e-19	SMCs	RAPGEF1
2.58637e-109	0.670097	0.894	0.747	5.17273e-106	SMCs	APOLD1
2.72081e-37	0.664365	0.888	0.703	5.44163e-34	SMCs	MKL2
1.07063e-39	0.662671	0.644	0.372	2.14126e-36	SMCs	AC113383.1
2.27153e-14	0.650247	0.397	0.563	4.54306e-11	SMCs	UAP1
2.17195e-16	0.650137	0.78	0.799	4.34389e-13	SMCs	CACNA1A
4.8087e-92	0.647726	0.778	0.507	9.6174e-89	SMCs	RBM20
1.36192e-171	0.647031	0.89	0.609	2.72384e-168	SMCs	CYR61
5.26383e-96	0.640804	0.815	0.546	1.05277e-92	SMCs	PALD1
8.80941e-15	0.638915	0.642	0.592	1.76188e-11	SMCs	ADGRL2
2.90114e-09	0.626515	0.703	0.578	5.80227e-06	SMCs	ROBO1
9.08513e-74	0.622631	0.798	0.659	1.81703e-70	SMCs	LMCD1
4.63965e-23	0.620481	0.672	0.7	9.2793e-20	SMCs	PTPN3
1.48113e-139	0.619807	0.882	0.509	2.96225e-136	SMCs	FAM189A1
2.64947e-108	0.615927	0.888	0.572	5.29894e-105	SMCs	SLC7A2
8.14548e-93	0.611524	0.796	0.49	1.6291e-89	SMCs	PLD1
5.70778e-112	0.610144	0.819	0.482	1.14156e-108	SMCs	HECW2
5.91284e-55	0.602357	0.805	0.605	1.18257e-51	SMCs	FN1
4.49546e-95	0.599615	0.821	0.536	8.99092e-92	SMCs	CPM
1.16664e-70	0.598692	0.757	0.602	2.33329e-67	SMCs	RERG
1.98887e-12	0.597664	0.84	0.839	3.97774e-09	SMCs	PHACTR1
3.07847e-74	0.593819	0.834	0.604	6.15695e-71	SMCs	OSMR
6.58646e-55	0.589864	0.877	0.709	1.31729e-51	SMCs	MTRNR2L12
8.2395e-22	0.589284	0.667	0.632	1.6479e-18	SMCs	HSPG2
2.64346e-22	0.587276	0.759	0.669	5.28693e-19	SMCs	GBE1
7.65614e-63	0.587001	0.773	0.625	1.53123e-59	SMCs	PRICKLE1
3.81403e-49	0.586369	0.855	0.609	7.62807e-46	SMCs	ELOVL5
1.54155e-17	0.58521	0.699	0.687	3.0831e-14	SMCs	NAMPT
8.39906e-54	0.585031	0.857	0.737	1.67981e-50	SMCs	SIPA1L2
1.04178e-116	0.5845	0.802	0.585	2.08356e-113	SMCs	PTGIS
2.75942e-89	0.584384	0.778	0.646	5.51884e-86	SMCs	COL3A1
9.50065e-94	0.580342	0.875	0.751	1.90013e-90	SMCs	PLD5
2.19224e-54	0.573844	0.734	0.527	4.38449e-51	SMCs	DOK6
2.13095e-146	0.572543	0.867	0.766	4.2619e-143	SMCs	OCA2
6.75188e-138	0.565458	0.911	0.612	1.35038e-134	SMCs	PRKCH
2.14417e-98	0.562873	0.865	0.793	4.28835e-95	SMCs	SLC19A1
1.02815e-05	0.562742	0.487	0.624	0.0205629	SMCs	SLC22A3
1.19447e-49	0.5627	0.694	0.566	2.38893e-46	SMCs	AC113386.1
4.05886e-65	0.556001	0.815	0.561	8.11772e-62	SMCs	RPS6KA3
1.74138e-05	0.554715	0.642	0.62	0.0348276	SMCs	LAMC1
1.55096e-68	0.554712	0.711	0.475	3.10192e-65	SMCs	SCN3A
2.20521e-135	0.554343	0.842	0.558	4.41043e-132	SMCs	ETS2
1.38115e-103	0.551392	0.796	0.657	2.76229e-100	SMCs	PRLR
2.56173e-26	0.550793	0.757	0.544	5.12346e-23	SMCs	PTMA
4.40496e-46	0.549875	0.705	0.55	8.80992e-43	SMCs	AC019197.1
6.42117e-138	0.548962	0.825	0.796	1.28423e-134	SMCs	VGLL3
8.16267e-25	0.540041	0.692	0.637	1.63253e-21	SMCs	NR4A2
9.38998e-64	0.538673	0.775	0.536	1.878e-60	SMCs	PRR16
1.40159e-151	0.536203	0.852	0.751	2.80318e-148	SMCs	LRRC32
3.00087e-76	0.529045	0.769	0.675	6.00174e-73	SMCs	MYO3A
4.5131e-67	0.523878	0.784	0.652	9.0262e-64	SMCs	BCAS2
1.52292e-32	0.522511	0.692	0.633	3.04585e-29	SMCs	DENND3
1.05362e-189	0.519559	0.904	0.755	2.10723e-186	SMCs	CDKN1A
8.35147e-60	0.518664	0.738	0.529	1.67029e-56	SMCs	FRAS1
4.83798e-57	0.515062	0.767	0.705	9.67596e-54	SMCs	ITGA5
2.25751e-29	0.513077	0.765	0.831	4.51502e-26	SMCs	RIPOR3
6.7458e-167	0.509647	0.873	0.634	1.34916e-163	SMCs	AC246817.1
7.67827e-19	0.509212	0.694	0.675	1.53565e-15	SMCs	AL450332.1
8.15643e-155	0.508872	0.846	0.56	1.63129e-151	SMCs	ADAMTS15
5.5565e-82	0.499497	0.796	0.632	1.1113e-78	SMCs	MAMDC2
5.37422e-64	0.491296	0.786	0.469	1.07484e-60	SMCs	AC007319.1
1.51761e-113	0.486017	0.827	0.679	3.03523e-110	SMCs	ATP10A
1.96317e-127	0.484186	0.832	0.588	3.92634e-124	SMCs	CYTOR
5.91547e-100	0.478136	0.834	0.575	1.18309e-96	SMCs	COL4A3
1.74434e-224	0.476464	0.881	0.287	3.48867e-221	SMCs	RUNX3
6.79541e-91	0.470037	0.753	0.532	1.35908e-87	SMCs	AC079380.1
2.65908e-87	0.468899	0.8	0.543	5.31815e-84	SMCs	KHDRBS3
3.15217e-54	0.461355	0.823	0.602	6.30434e-51	SMCs	TENT5A
1.62693e-20	0.460858	0.771	0.795	3.25386e-17	SMCs	FREM1
1.43616e-82	0.459655	0.836	0.714	2.87232e-79	SMCs	ANKRD33B
7.49689e-67	0.458595	0.775	0.594	1.49938e-63	SMCs	DACH1
1.88397e-07	0.458108	0.784	0.78	0.000376794	SMCs	GMDS
3.28727e-120	0.456856	0.784	0.488	6.57454e-117	SMCs	NTF3
2.86803e-15	0.455194	0.389	0.526	5.73605e-12	SMCs	UNC13C
2.88613e-179	0.454401	0.859	0.552	5.77225e-176	SMCs	ESAM
6.18436e-90	0.449329	0.746	0.421	1.23687e-86	SMCs	PALM2-AKAP2
2.53639e-17	0.448137	0.815	0.687	5.07277e-14	SMCs	RBMS3
1.66934e-95	0.447938	0.784	0.593	3.33869e-92	SMCs	LIMS2
3.71395e-141	0.446902	0.881	0.7	7.42789e-138	SMCs	ITGA11
3.19322e-19	0.445621	0.786	0.654	6.38644e-16	SMCs	XKR6
1.17668e-33	0.441691	0.763	0.539	2.35336e-30	SMCs	CCDC102B
8.3814e-23	0.437423	0.755	0.698	1.67628e-19	SMCs	PTH1R
2.45958e-28	0.434653	0.634	0.445	4.91915e-25	SMCs	VIPR2
2.04982e-18	0.43403	0.634	0.545	4.09964e-15	SMCs	NET1
1.39493e-07	0.431967	0.865	0.82	0.000278985	SMCs	ZEB1
3.70531e-08	0.423348	0.923	0.842	7.41063e-05	SMCs	SLC20A2
5.44758e-93	0.419592	0.867	0.608	1.08952e-89	SMCs	PAPPA
3.27786e-128	0.419135	0.815	0.557	6.55572e-125	SMCs	BGN
6.32978e-127	0.418594	0.802	0.676	1.26596e-123	SMCs	NPY1R
9.03689e-24	0.416218	0.908	0.819	1.80738e-20	SMCs	SH3D19
2.1978e-168	0.413362	0.842	0.415	4.39561e-165	SMCs	AC008591.1
2.05463e-35	0.405768	0.655	0.408	4.10926e-32	SMCs	SLC16A7
2.93195e-06	0.403904	0.618	0.546	0.0058639	SMCs	LRCH1
5.72749e-22	0.40339	0.636	0.673	1.1455e-18	SMCs	PPARGC1B
1.74737e-157	0.402778	0.942	0.622	3.49475e-154	SMCs	PROS1
2.26287e-60	0.399559	0.713	0.448	4.52575e-57	SMCs	TSPAN2
9.57316e-129	0.397938	0.829	0.759	1.91463e-125	SMCs	FAM162B
5.15204e-07	0.396231	0.73	0.704	0.00103041	SMCs	PCED1B
1.25158e-60	0.394334	0.917	0.844	2.50315e-57	SMCs	GPCPD1
2.07563e-07	0.393775	0.726	0.614	0.000415126	SMCs	AC073050.1
2.79424e-86	0.392836	0.825	0.612	5.58847e-83	SMCs	ERO1A
4.52342e-89	0.391858	0.803	0.507	9.04684e-86	SMCs	ARHGAP20
3.64683e-21	0.391538	0.671	0.631	7.29366e-18	SMCs	GRB10
1.45913e-105	0.385282	0.825	0.629	2.91827e-102	SMCs	SRGAP2B
2.08813e-44	0.377583	0.686	0.466	4.17627e-41	SMCs	TRPC3
3.49186e-85	0.372951	0.759	0.571	6.98372e-82	SMCs	STAT4
5.67035e-205	0.372518	0.929	0.653	1.13407e-201	SMCs	ARHGAP28
9.77039e-09	0.363779	0.8	0.717	1.95408e-05	SMCs	SLC24A3
1.98589e-108	0.362608	0.902	0.596	3.97177e-105	SMCs	MAN1A1
1.07613e-34	0.358903	0.719	0.636	2.15226e-31	SMCs	ARHGAP15
1.99495e-45	0.35816	0.732	0.457	3.9899e-42	SMCs	HSPA5
1.78202e-191	0.356338	0.873	0.415	3.56405e-188	SMCs	FGF10
1.85193e-07	0.355638	0.682	0.656	0.000370386	SMCs	AFF3
2.34511e-66	0.346845	0.778	0.705	4.69022e-63	SMCs	PPP1R15A
3.02298e-41	0.342708	0.9	0.716	6.04596e-38	SMCs	SNCAIP
3.44754e-09	0.341182	0.726	0.658	6.89508e-06	SMCs	ITGBL1
2.21813e-24	0.338447	0.713	0.706	4.43626e-21	SMCs	VIM
1.37261e-08	0.336431	0.748	0.643	2.74523e-05	SMCs	DOCK10
7.28059e-26	0.335726	0.682	0.638	1.45612e-22	SMCs	DCDC2C
9.22888e-180	0.334444	0.9	0.578	1.84578e-176	SMCs	ZNF536
8.2284e-39	0.332821	0.657	0.389	1.64568e-35	SMCs	GABRE
2.07118e-79	0.329675	0.95	0.819	4.14237e-76	SMCs	LHFPL2
2.16036e-50	0.328652	0.75	0.472	4.32072e-47	SMCs	DUSP1
4.4644e-42	0.328182	0.701	0.527	8.9288e-39	SMCs	SERPINE1
1.1218e-233	0.327829	0.94	0.636	2.24359e-230	SMCs	LINC01933
2.62264e-185	0.325683	0.904	0.611	5.24529e-182	SMCs	PLXDC1
7.25149e-80	0.32495	0.726	0.376	1.4503e-76	SMCs	COL13A1
8.38297e-18	0.324494	0.615	0.551	1.67659e-14	SMCs	CAV1
9.69315e-118	0.320233	0.85	0.548	1.93863e-114	SMCs	TRPC4
1.91886e-14	0.318277	0.634	0.722	3.83773e-11	SMCs	TRPC6
9.23715e-44	0.314426	0.792	0.607	1.84743e-40	SMCs	ADAMTS6
1.87476e-19	0.312219	0.719	0.59	3.74951e-16	SMCs	MBP
1.2437e-106	0.30856	0.807	0.452	2.4874e-103	SMCs	PGM5
4.63558e-142	0.306655	0.842	0.596	9.27117e-139	SMCs	TBX3
7.86945e-09	0.306452	0.661	0.664	1.57389e-05	SMCs	BTG2
2.94953e-76	0.303598	0.803	0.664	5.89907e-73	SMCs	NHSL2
5.38975e-254	0.295602	0.931	0.552	1.07795e-250	SMCs	SLC14A2
1.24457e-65	0.28416	0.763	0.621	2.48915e-62	SMCs	LPAR1
2.20368e-43	0.282778	0.672	0.382	4.40736e-40	SMCs	FAT4
3.37469e-60	0.28166	0.678	0.338	6.74939e-57	SMCs	SCN2A
3.74061e-17	0.28126	0.717	0.597	7.48122e-14	SMCs	NEXMIF
2.36239e-13	0.278617	0.859	0.88	4.72478e-10	SMCs	IGFBP5
3.6565e-51	0.277576	0.811	0.691	7.31301e-48	SMCs	IGF2BP2
2.88177e-08	0.277492	0.832	0.826	5.76355e-05	SMCs	MPPED2
9.04826e-66	0.275392	0.697	0.374	1.80965e-62	SMCs	MEDAG
3.15358e-202	0.27511	0.898	0.561	6.30716e-199	SMCs	AL138881.1
8.74892e-13	0.27493	0.697	0.753	1.74978e-09	SMCs	ARHGEF28
8.81665e-184	0.273774	0.867	0.376	1.76333e-180	SMCs	CMKLR1
1.80615e-70	0.27223	0.811	0.457	3.6123e-67	SMCs	RAPGEF4
2.55875e-120	0.27028	0.823	0.528	5.1175e-117	SMCs	GPC3
1.72825e-05	0.269867	0.94	0.935	0.034565	SMCs	FRMD4A
1.15975e-69	0.268521	0.803	0.611	2.31951e-66	SMCs	SP100
1.04951e-13	0.267026	0.382	0.525	2.09901e-10	SMCs	SLC6A17
3.6388e-09	0.266676	0.551	0.389	7.27761e-06	SMCs	CNTN5
1.04696e-65	0.264729	0.755	0.41	2.09392e-62	SMCs	SNTG1
1.46448e-136	0.26457	0.844	0.406	2.92896e-133	SMCs	SRGN
1.20025e-44	0.261085	0.709	0.448	2.4005e-41	SMCs	PRDM6
4.80484e-24	0.260908	0.938	0.712	9.60969e-21	SMCs	CADPS2
8.67702e-09	0.259378	0.403	0.495	1.7354e-05	SMCs	THBS1
3.28463e-59	0.257275	0.857	0.562	6.56926e-56	SMCs	EXOC6
4.39453e-25	0.256276	0.682	0.499	8.78906e-22	SMCs	RUNX1
3.64073e-98	0.253343	0.871	0.686	7.28146e-95	SMCs	MCF2L2
8.60197e-11	0.253181	0.393	0.482	1.72039e-07	SMCs	GABRA4
2.32013e-149	0.253059	0.875	0.734	4.64026e-146	SMCs	PTPRQ

## Sheet: MSCs
p_val	avg_log2FC	pct.1	pct.2	p_val_adj	cluster	gene
1.05796e-217	3.92507	0.96	0.444	2.11592e-214	MSCs	CHSY3
4.33799e-172	3.66791	0.893	0.49	8.67598e-169	MSCs	EYS
2.75996e-250	3.60389	0.998	0.913	5.51991e-247	MSCs	KCNMA1
7.21898e-196	3.59039	0.937	0.518	1.4438e-192	MSCs	UNC5C
2.07166e-219	3.48788	0.956	0.575	4.14333e-216	MSCs	SLIT2
5.42503e-192	3.46018	0.937	0.643	1.08501e-188	MSCs	PHLDB2
8.19443e-239	3.39961	0.998	0.945	1.63889e-235	MSCs	FOXP1
1.51589e-226	3.3814	0.981	0.732	3.03177e-223	MSCs	THSD4
4.67369e-117	3.32784	0.867	0.758	9.34738e-114	MSCs	AC008014.1
1.50113e-221	3.13244	0.977	0.654	3.00225e-218	MSCs	GPC6
3.55959e-218	3.10753	0.984	0.703	7.11917e-215	MSCs	BNC2
1.51499e-194	2.96273	0.953	0.452	3.02999e-191	MSCs	LEPR
1.41365e-230	2.9093	0.981	0.663	2.82729e-227	MSCs	NHSL2
2.75953e-200	2.85855	0.935	0.627	5.51906e-197	MSCs	SLC26A2
5.15321e-142	2.82463	0.897	0.575	1.03064e-138	MSCs	SLC38A2
6.63461e-156	2.80164	0.881	0.662	1.32692e-152	MSCs	SLC47A1
7.94042e-142	2.78152	0.921	0.749	1.58808e-138	MSCs	C8orf34
1.89961e-154	2.77409	0.918	0.689	3.79923e-151	MSCs	SPTLC3
1.14917e-130	2.6882	0.874	0.775	2.29834e-127	MSCs	JAM3
4.51804e-131	2.56779	0.963	0.872	9.03608e-128	MSCs	ADAMTSL3
2.28833e-166	2.54275	0.886	0.481	4.57666e-163	MSCs	PTGDR
3.31518e-155	2.53538	0.97	0.874	6.63036e-152	MSCs	SLC4A4
2.93539e-100	2.51834	0.902	0.861	5.87079e-97	MSCs	NDRG1
5.56613e-52	2.39761	0.734	0.726	1.11323e-48	MSCs	B4GALT1
1.73022e-108	2.35845	0.96	0.848	3.46045e-105	MSCs	EXT1
2.19873e-173	2.35395	0.958	0.748	4.39746e-170	MSCs	PLA2R1
1.36499e-151	2.35019	0.96	0.887	2.72997e-148	MSCs	AHCYL2
2.39354e-80	2.34048	0.802	0.762	4.78707e-77	MSCs	FBXO32
1.68851e-120	2.33664	0.832	0.447	3.37702e-117	MSCs	PRDM6
3.78414e-226	2.2921	0.965	0.639	7.56828e-223	MSCs	ENPP6
2.17286e-150	2.28084	0.888	0.576	4.34572e-147	MSCs	SNTG2
1.33027e-157	2.25279	0.96	0.725	2.66055e-154	MSCs	SULF1
4.56134e-115	2.24006	0.839	0.595	9.12269e-112	MSCs	TMOD1
2.46844e-148	2.22597	0.953	0.832	4.93689e-145	MSCs	SLC22A23
9.1935e-147	2.16544	0.972	0.765	1.8387e-143	MSCs	STXBP6
1.40479e-181	2.14371	0.951	0.485	2.80959e-178	MSCs	RYR2
6.42319e-150	2.13174	0.965	0.627	1.28464e-146	MSCs	ARHGAP10
1.56294e-113	2.10392	0.834	0.621	3.12588e-110	MSCs	PIEZO2
5.37129e-125	2.10161	0.862	0.602	1.07426e-121	MSCs	LINC01482
1.77139e-21	2.07459	0.632	0.696	3.54279e-18	MSCs	GADL1
1.96775e-178	2.07269	0.918	0.397	3.9355e-175	MSCs	PAQR5
1.78138e-103	1.95132	0.834	0.601	3.56275e-100	MSCs	PDE1A
8.13029e-146	1.94652	0.911	0.559	1.62606e-142	MSCs	UAP1
1.7363e-154	1.92908	0.893	0.674	3.4726e-151	MSCs	SCARA5
1.27609e-120	1.88718	0.907	0.779	2.55219e-117	MSCs	GMDS
5.52779e-52	1.88154	0.979	0.908	1.10556e-48	MSCs	SAMD4A
1.14933e-159	1.86994	0.902	0.652	2.29866e-156	MSCs	ALPL
2.70427e-123	1.85764	0.858	0.772	5.40855e-120	MSCs	TBX15
1.99633e-186	1.84279	0.93	0.761	3.99267e-183	MSCs	TRABD2B
1.27221e-58	1.83248	0.737	0.622	2.54441e-55	MSCs	CDON
3.11363e-159	1.81697	0.988	0.762	6.22726e-156	MSCs	BICC1
4.09718e-217	1.80736	0.97	0.681	8.19436e-214	MSCs	PKP2
1.93321e-53	1.79357	0.762	0.573	3.86643e-50	MSCs	SLC7A2
1.06427e-158	1.78388	0.967	0.743	2.12855e-155	MSCs	TPM4
1.45458e-104	1.77839	0.816	0.667	2.90916e-101	MSCs	AC018742.1
6.25226e-33	1.76401	0.73	0.641	1.25045e-29	MSCs	GNAL
2.01722e-135	1.73184	0.914	0.662	4.03444e-132	MSCs	BTG2
1.71499e-45	1.71823	0.867	0.782	3.42998e-42	MSCs	PLXNA4
8.2431e-71	1.70838	0.816	0.624	1.64862e-67	MSCs	FOXP2
6.30332e-76	1.69377	0.814	0.581	1.26066e-72	MSCs	NHS
4.0553e-236	1.68996	0.979	0.36	8.1106e-233	MSCs	MTUS2
5.74575e-74	1.68764	0.83	0.716	1.14915e-70	MSCs	SLC24A3
2.43874e-81	1.68654	0.86	0.738	4.87748e-78	MSCs	STK39
4.68311e-141	1.66635	0.949	0.72	9.36621e-138	MSCs	NR4A1
2.30891e-60	1.6591	0.765	0.753	4.61783e-57	MSCs	ARHGEF28
7.76905e-52	1.65316	0.716	0.382	1.55381e-48	MSCs	FAT4
2.86334e-28	1.63883	0.741	0.675	5.72667e-25	MSCs	PPP1CB
8.79547e-189	1.61058	0.974	0.659	1.75909e-185	MSCs	COL5A2
9.47396e-34	1.59991	0.681	0.568	1.89479e-30	MSCs	CHRM3
8.46808e-124	1.59661	0.981	0.628	1.69362e-120	MSCs	RBMS1
2.10884e-21	1.58357	0.634	0.448	4.21767e-18	MSCs	PDGFD
8.63531e-63	1.57143	0.846	0.795	1.72706e-59	MSCs	NXN
4.29755e-56	1.56514	0.953	0.769	8.5951e-53	MSCs	PDZRN4
6.82504e-58	1.56327	0.744	0.59	1.36501e-54	MSCs	FAM20A
4.6675e-77	1.55676	0.916	0.795	9.33501e-74	MSCs	SNED1
1.95197e-229	1.55205	0.984	0.733	3.90393e-226	MSCs	COL6A2
5.25054e-168	1.53904	0.979	0.521	1.05011e-164	MSCs	SVIL
2.16051e-123	1.52476	0.893	0.476	4.32103e-120	MSCs	ANK3
1.23728e-190	1.51724	0.925	0.588	2.47456e-187	MSCs	FOXC1
1.5632e-251	1.50246	0.984	0.678	3.1264e-248	MSCs	MCTP2
3.70465e-222	1.5007	0.986	0.704	7.40929e-219	MSCs	VIM
2.91561e-30	1.46347	0.667	0.551	5.83123e-27	MSCs	SLC26A7
1.36226e-40	1.44267	0.711	0.364	2.72452e-37	MSCs	LINGO2
7.63368e-61	1.42557	0.79	0.698	1.52674e-57	MSCs	PPFIBP1
1.12004e-21	1.40501	0.809	0.88	2.24009e-18	MSCs	IGFBP5
6.25772e-33	1.40294	0.692	0.751	1.25154e-29	MSCs	WDR86
2.98284e-37	1.39897	0.692	0.715	5.96567e-34	MSCs	AFAP1L1
5.85463e-49	1.38413	0.89	0.712	1.17093e-45	MSCs	CADPS2
8.05066e-62	1.38337	0.914	0.728	1.61013e-58	MSCs	MAML3
1.78829e-66	1.38225	0.809	0.74	3.57659e-63	MSCs	CLMP
2.17155e-90	1.36881	0.839	0.714	4.3431e-87	MSCs	ANKRD33B
4.37906e-104	1.3548	0.907	0.601	8.75812e-101	MSCs	COL23A1
5.12174e-66	1.34469	0.886	0.586	1.02435e-62	MSCs	NLGN1
5.00564e-93	1.33625	0.797	0.484	1.00113e-89	MSCs	PGR
8.84693e-85	1.33286	0.923	0.641	1.76939e-81	MSCs	ADAM12
1.99289e-41	1.33203	0.909	0.826	3.98578e-38	MSCs	TGFB2
7.12619e-205	1.32886	0.946	0.32	1.42524e-201	MSCs	SNCA
1.17854e-54	1.31916	0.718	0.475	2.35707e-51	MSCs	AC124254.1
8.93446e-145	1.30376	0.972	0.681	1.78689e-141	MSCs	PRELID2
7.18299e-42	1.29973	0.779	0.603	1.4366e-38	MSCs	YBX3
2.70307e-188	1.29474	0.967	0.712	5.40613e-185	MSCs	SMAD6
4.1715e-206	1.28153	0.986	0.629	8.34301e-203	MSCs	GRB10
1.16196e-60	1.28031	0.846	0.818	2.32392e-57	MSCs	UACA
1.04381e-32	1.26533	0.66	0.47	2.08762e-29	MSCs	MTMR7
6.36581e-65	1.25555	0.998	0.99	1.27316e-61	MSCs	NEAT1
4.26124e-103	1.24815	0.886	0.681	8.52248e-100	MSCs	RHOBTB1
1.33068e-13	1.24318	0.604	0.462	2.66137e-10	MSCs	NECAB1
8.61477e-36	1.2384	0.713	0.613	1.72295e-32	MSCs	SYNJ2
3.3858e-06	1.22651	0.571	0.472	0.0067716	MSCs	FILIP1
9.37397e-125	1.21969	0.886	0.718	1.87479e-121	MSCs	TP63
1.70096e-18	1.21807	0.69	0.687	3.40192e-15	MSCs	NAMPT
6.87216e-74	1.21653	0.965	0.853	1.37443e-70	MSCs	CALD1
5.76627e-49	1.2139	0.991	0.911	1.15325e-45	MSCs	ZFHX3
5.73884e-183	1.21344	0.921	0.703	1.14777e-179	MSCs	CLIC6
8.17947e-26	1.21298	0.361	0.55	1.63589e-22	MSCs	SLC6A6
6.76051e-50	1.21297	0.944	0.771	1.3521e-46	MSCs	BACH2
1.00963e-124	1.21292	0.937	0.528	2.01926e-121	MSCs	AGMO
2.89539e-17	1.1954	0.629	0.415	5.79077e-14	MSCs	DSP
1.65697e-20	1.18887	0.821	0.818	3.31395e-17	MSCs	WWTR1
5.64851e-20	1.18354	0.65	0.446	1.1297e-16	MSCs	CCSER1
6.68407e-13	1.15935	0.643	0.645	1.33681e-09	MSCs	NMNAT2
4.81779e-62	1.14667	0.837	0.588	9.63559e-59	MSCs	L3MBTL4
3.52232e-10	1.14155	0.611	0.645	7.04464e-07	MSCs	SH3BP5
3.63968e-14	1.10503	0.375	0.528	7.27935e-11	MSCs	ZNF804B
7.9145e-210	1.10186	0.958	0.465	1.5829e-206	MSCs	TRPC3
4.08452e-52	1.07199	0.935	0.937	8.16904e-49	MSCs	PDZRN3
6.35578e-59	1.06873	0.935	0.914	1.27116e-55	MSCs	CACNB2
5.31855e-53	1.06426	0.953	0.953	1.06371e-49	MSCs	CACNA2D3
2.42372e-228	1.06115	0.977	0.529	4.84745e-225	MSCs	ARNTL2
1.35392e-107	1.05845	0.848	0.567	2.70783e-104	MSCs	MEG3
2.90677e-205	1.05333	0.972	0.679	5.81355e-202	MSCs	ITGA10
1.48432e-83	1.05262	0.855	0.613	2.96864e-80	MSCs	PRKCH
2.29324e-06	1.05087	0.583	0.511	0.00458648	MSCs	DNAH14
6.35864e-82	1.04236	0.769	0.496	1.27173e-78	MSCs	CYP3A5
8.59626e-81	1.03983	0.974	0.626	1.71925e-77	MSCs	UBC
6.21274e-09	1.02957	0.613	0.473	1.24255e-05	MSCs	SLC12A2
6.55297e-249	1.02223	0.974	0.589	1.31059e-245	MSCs	PIK3R5
1.45057e-18	1.02139	0.697	0.649	2.90113e-15	MSCs	TXNIP
6.48013e-192	1.0197	0.942	0.762	1.29603e-188	MSCs	CCDC68
2.98093e-35	1.01009	0.814	0.787	5.96186e-32	MSCs	FLNB
1.07464e-55	1.00336	0.811	0.619	2.14929e-52	MSCs	ATP8B1
1.86307e-19	0.979051	0.657	0.562	3.72613e-16	MSCs	FSTL4
1.69531e-56	0.964077	0.755	0.472	3.39063e-53	MSCs	DUSP1
8.03422e-06	0.962851	0.583	0.604	0.0160684	MSCs	SLIT3
7.4476e-07	0.932444	0.592	0.59	0.00148952	MSCs	BMP6
6.46031e-122	0.931663	0.841	0.596	1.29206e-118	MSCs	SFRP2
5.2335e-37	0.927126	0.923	0.79	1.0467e-33	MSCs	PLCE1
7.21362e-24	0.926367	0.776	0.634	1.44272e-20	MSCs	SETBP1
1.11122e-08	0.919745	0.608	0.628	2.22244e-05	MSCs	REPS2
1.19799e-08	0.919161	0.646	0.735	2.39597e-05	MSCs	RASGRF2
2.88215e-38	0.917528	0.753	0.589	5.76429e-35	MSCs	MBP
6.5788e-146	0.912638	0.967	0.705	1.31576e-142	MSCs	NRP1
1.39744e-223	0.904226	0.986	0.703	2.79488e-220	MSCs	PPP1R15A
8.42147e-27	0.904072	0.8	0.606	1.68429e-23	MSCs	VCAN
1.24651e-127	0.902072	0.921	0.61	2.49303e-124	MSCs	AL662796.1
2.38917e-34	0.898266	0.979	0.943	4.77833e-31	MSCs	IGF1R
3.35008e-164	0.890538	0.928	0.756	6.70015e-161	MSCs	AC092155.1
2.51656e-49	0.885439	0.741	0.396	5.03312e-46	MSCs	MDGA2
6.06466e-23	0.883622	0.795	0.773	1.21293e-19	MSCs	CREB3L2
1.21513e-09	0.882747	0.636	0.678	2.43026e-06	MSCs	FOSL2
7.80376e-197	0.880906	0.925	0.33	1.56075e-193	MSCs	IGFBP6
2.33411e-07	0.876599	0.578	0.399	0.000466823	MSCs	SVEP1
6.29295e-229	0.867596	0.986	0.631	1.25859e-225	MSCs	SLC27A6
7.01422e-07	0.864695	0.657	0.649	0.00140284	MSCs	PPM1H
1.79806e-74	0.85589	0.886	0.6	3.59612e-71	MSCs	CENPP
3.57578e-60	0.855087	0.923	0.844	7.15156e-57	MSCs	TACC1
1.81863e-30	0.851451	0.9	0.753	3.63726e-27	MSCs	USP53
4.87951e-12	0.848655	0.646	0.585	9.75902e-09	MSCs	NPNT
9.22223e-40	0.846716	0.725	0.586	1.84445e-36	MSCs	CYP1B1-AS1
4.73107e-245	0.838579	0.984	0.561	9.46213e-242	MSCs	KANK4
7.83576e-81	0.836517	0.867	0.719	1.56715e-77	MSCs	CEMIP
9.51653e-39	0.832158	0.832	0.488	1.90331e-35	MSCs	SYT1
1.61538e-184	0.830008	0.965	0.556	3.23076e-181	MSCs	IL4R
9.68311e-139	0.829555	0.874	0.43	1.93662e-135	MSCs	TMSB10
1.38386e-108	0.828354	0.918	0.634	2.76771e-105	MSCs	COL8A1
2.54962e-179	0.809964	0.918	0.61	5.09925e-176	MSCs	TIMP1
1.67708e-55	0.803856	0.949	0.826	3.35417e-52	MSCs	MPPED2
1.16091e-18	0.802573	0.669	0.637	2.32183e-15	MSCs	NR4A2
1.09829e-124	0.787563	0.865	0.83	2.19659e-121	MSCs	TNFSF10
1.83704e-12	0.78713	0.613	0.577	3.67407e-09	MSCs	KCNK1
1.58216e-25	0.781694	0.883	0.748	3.16432e-22	MSCs	EFNA5
1.08484e-106	0.780094	0.904	0.601	2.16968e-103	MSCs	LINC01725
9.00482e-23	0.778881	0.748	0.67	1.80096e-19	MSCs	ESYT2
1.30706e-43	0.777412	0.825	0.709	2.61412e-40	MSCs	CEBPD
2.88135e-120	0.776504	0.865	0.442	5.7627e-117	MSCs	GUCY1A1
6.99381e-26	0.776422	0.35	0.612	1.39876e-22	MSCs	MET
1.77488e-44	0.772198	0.755	0.595	3.54975e-41	MSCs	FBN2
2.02005e-210	0.76679	0.97	0.744	4.04011e-207	MSCs	CLEC1A
1.66725e-138	0.759008	0.93	0.595	3.3345e-135	MSCs	ERC2
8.27583e-78	0.755049	0.928	0.556	1.65517e-74	MSCs	FOS
7.04795e-11	0.745568	0.634	0.622	1.40959e-07	MSCs	LPAR1
4.99349e-247	0.744671	0.972	0.775	9.98698e-244	MSCs	STEAP4
1.73185e-37	0.732017	0.678	0.391	3.46371e-34	MSCs	MEG8
6.83988e-38	0.731019	0.713	0.456	1.36798e-34	MSCs	COL1A2
2.84854e-87	0.73086	0.907	0.671	5.69709e-84	MSCs	SYNDIG1
1.08339e-176	0.726472	0.974	0.707	2.16679e-173	MSCs	COL24A1
1.27208e-16	0.7241	0.613	0.433	2.54416e-13	MSCs	PLPPR4
2.47457e-165	0.71994	0.946	0.52	4.94915e-162	MSCs	ZFP36
7.6179e-85	0.718076	0.853	0.792	1.52358e-81	MSCs	NID2
7.13962e-41	0.716021	0.72	0.508	1.42792e-37	MSCs	ARHGAP20
4.86574e-11	0.713917	0.69	0.589	9.73147e-08	MSCs	LRFN5
1.62383e-53	0.712631	0.809	0.773	3.24765e-50	MSCs	FAM129A
1.26439e-55	0.707309	0.972	0.754	2.52879e-52	MSCs	VCL
7.65866e-253	0.698314	0.986	0.544	1.53173e-249	MSCs	ITIH2
1.82363e-24	0.697928	0.967	0.705	3.64725e-21	MSCs	HSP90AA1
3.91356e-129	0.696261	0.89	0.551	7.82712e-126	MSCs	HECW1
7.30738e-115	0.690187	0.909	0.578	1.46148e-111	MSCs	DSCAML1
1.86376e-92	0.673167	0.846	0.677	3.72752e-89	MSCs	ABCB1
1.72431e-86	0.670153	0.783	0.445	3.44862e-83	MSCs	SLCO2A1
1.79871e-145	0.669774	0.942	0.604	3.59742e-142	MSCs	RASSF3
1.15133e-06	0.667002	0.632	0.549	0.00230266	MSCs	COL11A1
7.01057e-98	0.664062	0.907	0.418	1.40211e-94	MSCs	GALNTL6
1.54263e-18	0.663498	0.403	0.717	3.08527e-15	MSCs	FAM160A1
1.06592e-92	0.663331	0.895	0.59	2.13184e-89	MSCs	ADGRL2
5.74598e-30	0.656428	0.951	0.686	1.1492e-26	MSCs	STPG2
2.12118e-171	0.647649	0.914	0.544	4.24237e-168	MSCs	BTNL9
4.19578e-62	0.645933	0.86	0.638	8.39157e-59	MSCs	LINC01515
9.58565e-99	0.644414	0.914	0.681	1.91713e-95	MSCs	PCBP3
5.82101e-06	0.64105	0.613	0.597	0.011642	MSCs	AC079298.3
2.10611e-46	0.639304	0.786	0.524	4.21223e-43	MSCs	EPHA7
7.63048e-53	0.637199	0.823	0.593	1.5261e-49	MSCs	IER2
4.35969e-191	0.636576	0.93	0.301	8.71937e-188	MSCs	SCN9A
1.41786e-227	0.634928	0.986	0.819	2.83573e-224	MSCs	SLC6A20
1.19029e-52	0.62982	0.786	0.523	2.38057e-49	MSCs	UNC13C
2.89711e-151	0.622219	0.907	0.554	5.79422e-148	MSCs	MYO5B
1.59947e-22	0.618646	0.357	0.565	3.19893e-19	MSCs	GPRC5A
9.24427e-06	0.616206	0.448	0.534	0.0184885	MSCs	GLCE
5.21906e-53	0.613365	0.734	0.583	1.04381e-49	MSCs	EIF4A3
1.08715e-99	0.606736	0.888	0.476	2.17431e-96	MSCs	PCDH15
2.57823e-87	0.603255	0.958	0.571	5.15646e-84	MSCs	ACTN4
1.42578e-48	0.601426	0.951	0.754	2.85156e-45	MSCs	APBB2
1.22232e-201	0.593929	0.942	0.441	2.44465e-198	MSCs	EGR1
7.01397e-161	0.589072	0.93	0.715	1.40279e-157	MSCs	LINC01197
2.55822e-68	0.588786	0.893	0.79	5.11644e-65	MSCs	GRK5
9.38814e-33	0.584746	0.732	0.707	1.87763e-29	MSCs	JCAD
4.54999e-125	0.583408	0.949	0.658	9.09999e-122	MSCs	KCNE4
1.60552e-53	0.578575	0.753	0.638	3.21104e-50	MSCs	DCDC2C
2.53731e-102	0.576691	0.811	0.388	5.07463e-99	MSCs	GABRE
1.20003e-31	0.576068	0.296	0.475	2.40007e-28	MSCs	GRM7
1.23321e-110	0.575391	0.932	0.468	2.46642e-107	MSCs	AC007319.1
6.0019e-23	0.56941	0.357	0.517	1.20038e-19	MSCs	ASS1
2.90588e-19	0.564616	0.66	0.65	5.81175e-16	MSCs	MLPH
3.73994e-88	0.55962	0.83	0.7	7.47987e-85	MSCs	ITGA11
4.91661e-37	0.558563	0.333	0.586	9.83322e-34	MSCs	GCNT2
1.10984e-131	0.553903	0.977	0.628	2.21969e-128	MSCs	ST3GAL6
5.79877e-181	0.536369	0.956	0.406	1.15975e-177	MSCs	SLC16A7
1.98501e-171	0.535516	0.907	0.625	3.97002e-168	MSCs	AC106729.1
1.11843e-214	0.535385	0.984	0.648	2.23686e-211	MSCs	SLC16A14
4.10475e-30	0.516986	0.807	0.587	8.20951e-27	MSCs	CREM
2.52348e-10	0.510257	0.424	0.74	5.04697e-07	MSCs	CYP1B1
1.7136e-206	0.508143	0.951	0.621	3.4272e-203	MSCs	CYYR1
1.41421e-23	0.503168	0.361	0.523	2.82842e-20	MSCs	SGPP2
2.34685e-193	0.496042	0.979	0.415	4.6937e-190	MSCs	HS3ST4
1.34008e-93	0.490015	0.928	0.638	2.68015e-90	MSCs	RARB
1.97283e-62	0.486652	0.762	0.442	3.94566e-59	MSCs	CD55
2.82435e-50	0.48288	0.711	0.556	5.6487e-47	MSCs	KCNJ2
2.26197e-32	0.481573	0.844	0.656	4.52394e-29	MSCs	MYH9
5.73152e-19	0.478562	0.695	0.705	1.1463e-15	MSCs	ITGA5
8.86419e-17	0.47848	0.734	0.642	1.77284e-13	MSCs	REEP1
1.96762e-18	0.474452	0.361	0.42	3.93525e-15	MSCs	AC008591.1
1.90826e-144	0.467347	0.888	0.371	3.81652e-141	MSCs	C5orf17
5.52974e-06	0.464966	0.494	0.71	0.0110595	MSCs	AGBL1
1.34415e-210	0.462817	0.984	0.528	2.68831e-207	MSCs	IPCEF1
1.36008e-174	0.461741	0.965	0.466	2.72016e-171	MSCs	ABCA10
5.10268e-19	0.46115	0.716	0.612	1.02054e-15	MSCs	SP100
1.56111e-196	0.459538	0.963	0.659	3.12222e-193	MSCs	GCH1
8.94096e-42	0.454094	0.326	0.643	1.78819e-38	MSCs	PCDH11Y
9.39282e-60	0.453006	0.795	0.428	1.87856e-56	MSCs	FGF12
8.67572e-210	0.448988	0.972	0.504	1.73514e-206	MSCs	NXPH1
5.27009e-106	0.448965	0.897	0.733	1.05402e-102	MSCs	ATF3
6.67873e-19	0.448496	0.671	0.583	1.33575e-15	MSCs	LAMB1
9.6861e-97	0.448399	0.904	0.73	1.93722e-93	MSCs	JAG1
8.15147e-237	0.448282	0.986	0.556	1.63029e-233	MSCs	CSF2RA
6.7733e-18	0.434612	0.413	0.66	1.35466e-14	MSCs	ITGBL1
1.86801e-256	0.431806	0.988	0.481	3.73602e-253	MSCs	LINC01798
3.85085e-30	0.431425	0.331	0.488	7.7017e-27	MSCs	PRMT8
7.82302e-22	0.427836	0.83	0.71	1.5646e-18	MSCs	MTRNR2L12
1.54447e-176	0.42528	0.958	0.679	3.08895e-173	MSCs	ARRDC4
1.23281e-200	0.425058	0.942	0.846	2.46561e-197	MSCs	PLEKHG4B
3.47728e-06	0.422232	0.587	0.442	0.00695455	MSCs	FGD5
2.23559e-128	0.414288	0.986	0.725	4.47118e-125	MSCs	OSBPL10
6.05045e-13	0.411698	0.41	0.665	1.21009e-09	MSCs	VLDLR-AS1
5.07032e-19	0.410177	0.781	0.627	1.01406e-15	MSCs	RANBP17
6.20134e-141	0.40644	0.958	0.534	1.24027e-137	MSCs	OPCML
4.06497e-181	0.403882	0.972	0.525	8.12994e-178	MSCs	DOK6
3.69346e-21	0.40159	0.373	0.45	7.38692e-18	MSCs	AL591501.1
6.15785e-15	0.401301	0.394	0.486	1.23157e-11	MSCs	HECW2
6.95901e-28	0.396051	0.807	0.605	1.3918e-24	MSCs	FN1
1.36732e-116	0.395385	0.851	0.416	2.73463e-113	MSCs	FGF10
7.05949e-199	0.395273	0.967	0.559	1.4119e-195	MSCs	SEZ6L
5.35447e-207	0.395007	0.979	0.522	1.07089e-203	MSCs	CCDC81
3.22709e-164	0.393599	0.977	0.638	6.45418e-161	MSCs	SH3KBP1
2.31499e-76	0.392177	0.916	0.585	4.62998e-73	MSCs	PEX5L
8.28499e-41	0.390798	0.79	0.61	1.657e-37	MSCs	NR4A3
1.629e-41	0.388141	0.298	0.43	3.258e-38	MSCs	ST6GALNAC5
8.49317e-06	0.384546	0.513	0.714	0.0169863	MSCs	CPED1
4.66631e-15	0.382994	0.438	0.648	9.33261e-12	MSCs	PLXNC1
6.30911e-85	0.3811	0.972	0.703	1.26182e-81	MSCs	PARP14
3.35335e-149	0.379799	0.974	0.65	6.70671e-146	MSCs	SEMA5A
1.69342e-73	0.377918	0.809	0.392	3.38684e-70	MSCs	EDIL3
4.2705e-55	0.377809	0.287	0.672	8.541e-52	MSCs	C8orf34-AS1
1.9482e-06	0.377059	0.599	0.708	0.0038964	MSCs	OGN
4.24388e-26	0.376993	0.69	0.575	8.48775e-23	MSCs	SLC1A1
1.4435e-162	0.376804	0.979	0.62	2.887e-159	MSCs	LEKR1
2.28362e-36	0.37242	0.795	0.697	4.56724e-33	MSCs	CHODL
1.28424e-26	0.370862	0.8	0.607	2.56848e-23	MSCs	CACNA1D
1.31058e-72	0.369419	0.963	0.734	2.62115e-69	MSCs	RALGPS2
3.11865e-22	0.368602	0.408	0.725	6.23729e-19	MSCs	PLCL2
1.91232e-21	0.364128	0.753	0.652	3.82464e-18	MSCs	TIPARP
8.08187e-232	0.357729	0.967	0.467	1.61637e-228	MSCs	AC026704.1
2.5459e-13	0.357188	0.765	0.802	5.0918e-10	MSCs	COL5A1
4.99681e-157	0.353942	0.96	0.611	9.99362e-154	MSCs	HDX
1.28124e-20	0.353045	0.373	0.604	2.56248e-17	MSCs	OBSCN
2.86235e-44	0.352995	0.967	0.756	5.7247e-41	MSCs	CRIM1
5.55053e-17	0.344394	0.869	0.632	1.11011e-13	MSCs	DLGAP2
1.43658e-18	0.340857	0.932	0.784	2.87315e-15	MSCs	GHR
4.6579e-47	0.33538	0.872	0.613	9.3158e-44	MSCs	AC073050.1
1.54017e-20	0.333816	0.937	0.721	3.08033e-17	MSCs	CMSS1
2.27924e-63	0.329109	0.256	0.583	4.55849e-60	MSCs	ZNF536
5.50536e-25	0.321085	0.725	0.567	1.10107e-21	MSCs	ID3
2.16227e-59	0.31981	0.809	0.457	4.32455e-56	MSCs	HSPA5
8.32227e-136	0.316586	0.953	0.626	1.66445e-132	MSCs	HERPUD1
3.52224e-11	0.313695	0.797	0.736	7.04449e-08	MSCs	AL445426.1
9.28696e-134	0.311048	0.96	0.62	1.85739e-130	MSCs	AC079760.1
4.62185e-47	0.311038	0.883	0.563	9.24369e-44	MSCs	EXOC6
2.63598e-107	0.309464	0.904	0.575	5.27197e-104	MSCs	COL4A3
1.21175e-44	0.3078	0.284	0.572	2.42349e-41	MSCs	NDST4
2.98264e-59	0.30774	0.837	0.511	5.96529e-56	MSCs	ASIC2
1.61371e-172	0.306153	0.965	0.529	3.22742e-169	MSCs	GALNT3
2.48103e-25	0.301709	0.417	0.734	4.96206e-22	MSCs	KCNQ1OT1
1.77562e-24	0.301584	0.965	0.763	3.55124e-21	MSCs	CERS6
1.21997e-63	0.299411	0.865	0.572	2.43995e-60	MSCs	PLAGL1
8.11092e-41	0.294197	0.382	0.794	1.62218e-37	MSCs	SLC45A4
5.53955e-110	0.29151	0.979	0.7	1.10791e-106	MSCs	AF279873.3
5.05395e-11	0.29044	0.9	0.772	1.01079e-07	MSCs	ULK4
5.80656e-07	0.290363	0.662	0.597	0.00116131	MSCs	DOCK9
1.98608e-07	0.289971	0.716	0.594	0.000397216	MSCs	HMGCS1
7.91138e-63	0.285832	0.818	0.556	1.58228e-59	MSCs	B2M
6.27427e-100	0.284138	0.839	0.638	1.25485e-96	MSCs	AC137770.1
2.30128e-23	0.281622	0.867	0.76	4.60257e-20	MSCs	RHOJ
1.50955e-236	0.278309	0.979	0.626	3.01911e-233	MSCs	DRC7
1.29267e-10	0.272712	0.45	0.59	2.58535e-07	MSCs	AC021504.1
3.88431e-13	0.272635	0.399	0.408	7.76862e-10	MSCs	TNFRSF11B
4.00808e-76	0.271733	0.83	0.629	8.01617e-73	MSCs	ANKDD1B
4.17018e-08	0.271536	0.669	0.566	8.34037e-05	MSCs	TUSC3
1.77682e-19	0.270984	0.483	0.798	3.55364e-16	MSCs	DIRC3
3.80962e-16	0.267437	0.622	0.404	7.61925e-13	MSCs	SLC9A2
5.12095e-20	0.265144	0.275	0.422	1.02419e-16	MSCs	KHDRBS2
7.71544e-65	0.264663	0.928	0.668	1.54309e-61	MSCs	CYTH3
1.82518e-172	0.264011	0.974	0.701	3.65037e-169	MSCs	NKD1
5.44162e-162	0.26265	0.916	0.356	1.08832e-158	MSCs	OVCH1-AS1
1.33141e-40	0.262233	0.296	0.457	2.66281e-37	MSCs	AP002989.1
1.45376e-35	0.260943	0.331	0.55	2.90752e-32	MSCs	PDE10A
1.04114e-69	0.260695	0.883	0.783	2.08229e-66	MSCs	AC092957.1
1.57973e-26	0.256286	0.667	0.527	3.15946e-23	MSCs	VWA5B1
6.45907e-07	0.254642	0.483	0.721	0.00129181	MSCs	ANXA1
6.37794e-29	0.254118	0.893	0.687	1.27559e-25	MSCs	H3F3B
