# Supplementary material for: Single-nucleus RNA sequencing of midbrain blood-brain barrier cells in schizophrenia reveals subtle transcriptional changes with overall preservation of cellular proportions and phenotypes
Source: Mol Psychiatry. 2022 Oct 3;27(11):4731–40. doi: 10.1038/s41380-022-01796-0 (PMC9734060; doi:10.1038/s41380-022-01796-0)
Supplement: Supplementary file 4 — Supplementary Table 4 [file 41380_2022_1796_MOESM4_ESM.xlsx]

## Sheet: Endo_veins2
p_val	avg_log2FC	pct.1	pct.2	p_val_adj	cluster	gene
2.77248e-38	3.28894	0.615	0.23	9.29835e-34	Endo_veins2	SQSTM1
7.33356e-56	3.12986	0.705	0.213	2.45953e-51	Endo_veins2	IL1R1
1.19156e-74	2.94721	0.481	0.058	3.99625e-70	Endo_veins2	SERPINE1
1.53822e-54	2.71274	0.776	0.294	5.15889e-50	Endo_veins2	NDRG1
2.50148e-41	2.44596	0.724	0.309	8.38948e-37	Endo_veins2	PTMA
1.2929e-42	2.4079	0.724	0.316	4.33612e-38	Endo_veins2	BACE2
9.21512e-54	2.36055	0.679	0.195	3.09057e-49	Endo_veins2	LRRC1
1.23406e-56	2.25512	0.417	0.06	4.13877e-52	Endo_veins2	PKHD1L1
1.715e-27	2.20374	0.596	0.263	5.75178e-23	Endo_veins2	NUAK1
1.11598e-39	2.16845	0.564	0.171	3.74277e-35	Endo_veins2	ERO1A
6.92639e-18	2.1389	0.429	0.18	2.32297e-13	Endo_veins2	CEMIP
1.01204e-47	2.1184	0.41	0.069	3.39418e-43	Endo_veins2	ABI3BP
8.92548e-39	2.11625	0.481	0.122	2.99343e-34	Endo_veins2	TXNIP
3.14859e-23	2.1131	0.564	0.27	1.05598e-18	Endo_veins2	ATP8B1
6.23366e-35	2.10751	0.782	0.478	2.09064e-30	Endo_veins2	CLIC4
2.76207e-23	2.0691	0.66	0.387	9.26342e-19	Endo_veins2	GRK5
7.27239e-36	2.05298	0.731	0.352	2.43902e-31	Endo_veins2	IL4R
4.6356e-21	2.04036	0.423	0.157	1.55469e-16	Endo_veins2	GPM6A
2.71682e-22	2.03745	0.218	0.041	9.11167e-18	Endo_veins2	COL25A1
1.38564e-21	2.03446	0.635	0.342	4.64715e-17	Endo_veins2	SLC2A3
3.05937e-63	2.03214	0.66	0.149	1.02605e-58	Endo_veins2	HSPA5
6.4182e-25	2.02998	0.577	0.266	2.15254e-20	Endo_veins2	TPM4
1.72065e-20	1.99993	0.237	0.054	5.77073e-16	Endo_veins2	ICAM1
1.56583e-50	1.99099	0.705	0.217	5.2515e-46	Endo_veins2	BNC2
3.06167e-35	1.96636	0.545	0.175	1.02682e-30	Endo_veins2	EEF1A1
8.51685e-47	1.96084	0.603	0.166	2.85638e-42	Endo_veins2	ADGRG6
2.01561e-39	1.95107	0.667	0.264	6.75994e-35	Endo_veins2	ACTN1
3.37158e-17	1.90821	0.692	0.493	1.13076e-12	Endo_veins2	B2M
2.95423e-35	1.89299	0.744	0.383	9.90789e-31	Endo_veins2	RALGAPA2
5.27352e-29	1.89294	0.346	0.08	1.76863e-24	Endo_veins2	LDHA
1.3773e-39	1.86828	0.282	0.038	4.61918e-35	Endo_veins2	SRPX
1.1329e-18	1.85837	0.487	0.216	3.79953e-14	Endo_veins2	SH3RF3
2.52593e-13	1.85764	0.378	0.167	8.47147e-09	Endo_veins2	PLOD2
2.00723e-39	1.85542	0.41	0.088	6.73186e-35	Endo_veins2	DAPK3
2.63322e-29	1.84345	0.417	0.12	8.8313e-25	Endo_veins2	CLEC2B
1.60796e-23	1.84186	0.237	0.046	5.39277e-19	Endo_veins2	PLCXD3
7.49017e-32	1.82721	0.385	0.093	2.51205e-27	Endo_veins2	ITPRIP
6.12244e-35	1.80875	0.545	0.174	2.05334e-30	Endo_veins2	GABARAPL1
5.6607e-13	1.8078	0.346	0.145	1.89849e-08	Endo_veins2	HSP90B1
2.24179e-29	1.74188	0.577	0.223	7.51852e-25	Endo_veins2	CALCRL
6.37679e-24	1.73491	0.353	0.097	2.13865e-19	Endo_veins2	TLL1
1.73751e-39	1.70734	0.378	0.068	5.82727e-35	Endo_veins2	ATF3
8.958e-27	1.70328	0.25	0.045	3.00433e-22	Endo_veins2	ID2
2.16213e-25	1.70139	0.705	0.419	7.25135e-21	Endo_veins2	NAMPT
5.75189e-26	1.69349	0.538	0.207	1.92907e-21	Endo_veins2	GNA14
1.74446e-19	1.68416	0.436	0.165	5.85057e-15	Endo_veins2	SNTG2
1.54812e-24	1.6827	0.314	0.075	5.19208e-20	Endo_veins2	VCAM1
8.53673e-25	1.6695	0.429	0.142	2.86305e-20	Endo_veins2	PLA1A
2.08635e-27	1.66511	0.301	0.064	6.99719e-23	Endo_veins2	ADAMTSL3
2.40301e-15	1.63006	0.5	0.261	8.05923e-11	Endo_veins2	TGFBR3
8.05069e-38	1.62752	0.654	0.231	2.70004e-33	Endo_veins2	PPP1CB
1.10433e-10	1.598	0.513	0.324	3.7037e-06	Endo_veins2	AKAP12
4.16204e-16	1.58535	0.372	0.147	1.39586e-11	Endo_veins2	PTPRE
9.67367e-35	1.58346	0.5	0.137	3.24435e-30	Endo_veins2	ARID5A
2.74431e-27	1.58259	0.34	0.079	9.20385e-23	Endo_veins2	INSIG1
2.90559e-11	1.56118	0.321	0.143	9.74478e-07	Endo_veins2	SPNS2
3.7779e-12	1.54146	0.295	0.118	1.26703e-07	Endo_veins2	SH3BP5
5.91993e-27	1.50279	0.865	0.627	1.98543e-22	Endo_veins2	CRIM1
4.68706e-23	1.50039	0.25	0.052	1.57195e-18	Endo_veins2	C1orf21
8.05435e-18	1.49299	0.596	0.357	2.70127e-13	Endo_veins2	HMBOX1
1.00497e-21	1.45395	0.436	0.158	3.37045e-17	Endo_veins2	CARMIL1
1.10626e-14	1.44904	0.551	0.318	3.71016e-10	Endo_veins2	EPS8
5.07578e-21	1.44071	0.237	0.051	1.70231e-16	Endo_veins2	FAM198B
1.09526e-21	1.43887	0.404	0.132	3.6733e-17	Endo_veins2	SAMD5
9.21786e-14	1.4386	0.628	0.407	3.09149e-09	Endo_veins2	FN1
1.93948e-20	1.43843	0.34	0.105	6.50464e-16	Endo_veins2	PPP2R1B
1.45273e-25	1.43342	0.391	0.109	4.87215e-21	Endo_veins2	PDLIM1
1.71527e-22	1.4169	0.692	0.367	5.75266e-18	Endo_veins2	CMIP
1.76886e-14	1.4149	0.231	0.067	5.93239e-10	Endo_veins2	BNIP3
4.28275e-08	1.40947	0.397	0.244	0.00143635	Endo_veins2	RHOA
5.50375e-23	1.39898	0.59	0.266	1.84585e-18	Endo_veins2	JUN
1.15441e-12	1.39661	0.647	0.451	3.87167e-08	Endo_veins2	FP671120.1
1.01833e-14	1.39629	0.526	0.297	3.41527e-10	Endo_veins2	ZMYND8
2.83565e-18	1.39504	0.385	0.142	9.5102e-14	Endo_veins2	GBP2
1.54555e-18	1.38709	0.16	0.027	5.18346e-14	Endo_veins2	COL23A1
1.93191e-16	1.37117	0.423	0.186	6.47925e-12	Endo_veins2	CORO1C
1.34461e-06	1.36799	0.41	0.275	0.0450956	Endo_veins2	GSE1
1.66876e-13	1.36653	0.397	0.182	5.59668e-09	Endo_veins2	ZFAND5
3.98585e-31	1.36189	0.295	0.052	1.33677e-26	Endo_veins2	TNFAIP3
7.90324e-33	1.36033	0.891	0.504	2.65059e-28	Endo_veins2	FAM155A
1.5078e-26	1.35895	0.782	0.409	5.05686e-22	Endo_veins2	TSHZ2
2.60936e-25	1.35228	0.673	0.338	8.75126e-21	Endo_veins2	MYOF
1.1234e-15	1.34991	0.564	0.323	3.76765e-11	Endo_veins2	TOP1
4.11006e-20	1.34694	0.583	0.278	1.37843e-15	Endo_veins2	ABCC4
2.23691e-19	1.34441	0.571	0.295	7.50213e-15	Endo_veins2	CCNL1
5.46217e-16	1.34103	0.442	0.193	1.8319e-11	Endo_veins2	FGFR1
1.29209e-06	1.32864	0.224	0.106	0.0433342	Endo_veins2	SLCO2A1
2.26655e-20	1.32784	0.256	0.061	7.60156e-16	Endo_veins2	NR2F2-AS1
1.68784e-16	1.3125	0.827	0.716	5.66069e-12	Endo_veins2	MEF2A
1.77981e-24	1.30666	0.282	0.061	5.96913e-20	Endo_veins2	MAFF
3.73775e-16	1.29978	0.622	0.368	1.25357e-11	Endo_veins2	UBC
9.24412e-20	1.28407	0.538	0.239	3.10029e-15	Endo_veins2	TMTC1
1.06324e-15	1.27463	0.429	0.179	3.56589e-11	Endo_veins2	CPE
2.35e-21	1.26674	0.218	0.043	7.88143e-17	Endo_veins2	DOK5
1.11923e-06	1.26494	0.237	0.115	0.0375367	Endo_veins2	ANKRD37
2.54152e-20	1.26236	0.25	0.056	8.52374e-16	Endo_veins2	EFEMP1
9.02932e-17	1.24743	0.321	0.106	3.02825e-12	Endo_veins2	AL033504.1
9.38174e-13	1.24404	0.353	0.148	3.14645e-08	Endo_veins2	TNFRSF10B
2.04557e-12	1.23336	0.301	0.117	6.86042e-08	Endo_veins2	PER1
3.33848e-11	1.23244	0.532	0.319	1.11966e-06	Endo_veins2	MCTP1
2.23507e-09	1.22427	0.327	0.162	7.49596e-05	Endo_veins2	IFNGR2
1.26603e-21	1.21814	0.808	0.55	4.246e-17	Endo_veins2	FOXO1
2.75717e-27	1.21745	0.109	0.006	9.247e-23	Endo_veins2	POSTN
1.69762e-13	1.20884	0.468	0.227	5.69347e-09	Endo_veins2	CDH23
9.74701e-12	1.20297	0.263	0.097	3.26895e-07	Endo_veins2	ANKRD33B
2.93779e-12	1.17995	0.545	0.318	9.85275e-08	Endo_veins2	MSN
1.28274e-14	1.17687	0.487	0.237	4.30206e-10	Endo_veins2	HIF1A
4.13356e-10	1.17359	0.231	0.086	1.38631e-05	Endo_veins2	GADD45B
1.18176e-15	1.17196	0.699	0.523	3.9634e-11	Endo_veins2	RAPGEF4
1.53782e-11	1.15892	0.551	0.344	5.15755e-07	Endo_veins2	SMAD3
1.34329e-22	1.15716	0.167	0.023	4.50512e-18	Endo_veins2	RGS2
2.46018e-14	1.15238	0.122	0.02	8.25095e-10	Endo_veins2	SELE
1.20095e-08	1.14591	0.372	0.2	0.000402775	Endo_veins2	PLS3
4.20325e-11	1.14081	0.423	0.227	1.40968e-06	Endo_veins2	RNF145
1.78545e-10	1.1296	0.494	0.303	5.98804e-06	Endo_veins2	PIP5K1C
6.24477e-13	1.1221	0.769	0.657	2.09437e-08	Endo_veins2	AC016831.7
2.17146e-13	1.11857	0.699	0.511	7.28263e-09	Endo_veins2	NEDD9
2.04496e-13	1.1082	0.256	0.083	6.85837e-09	Endo_veins2	ARRDC3
4.11835e-08	1.10528	0.615	0.514	0.00138121	Endo_veins2	MYH9
7.69815e-12	1.10436	0.263	0.094	2.5818e-07	Endo_veins2	DANT2
5.5853e-11	1.10415	0.237	0.084	1.8732e-06	Endo_veins2	GPI
1.67013e-11	1.10385	0.462	0.251	5.60128e-07	Endo_veins2	ACTB
2.76741e-18	1.09802	0.891	0.724	9.28135e-14	Endo_veins2	VWF
2.64926e-10	1.09461	0.346	0.168	8.88508e-06	Endo_veins2	CD55
2.56362e-24	1.0936	0.186	0.026	8.59786e-20	Endo_veins2	CPXM2
3.30601e-09	1.07483	0.436	0.255	0.000110877	Endo_veins2	CAPZA2
1.08959e-06	1.07232	0.308	0.168	0.0365426	Endo_veins2	ACSL4
8.11516e-09	1.07188	0.731	0.645	0.000272166	Endo_veins2	NXN
2.99136e-08	1.07152	0.545	0.385	0.00100324	Endo_veins2	ARHGEF3
3.08167e-13	1.0715	0.321	0.124	1.03353e-08	Endo_veins2	CTNNAL1
2.55584e-10	1.06808	0.532	0.338	8.57177e-06	Endo_veins2	KLF6
8.55319e-07	1.0668	0.346	0.201	0.0286857	Endo_veins2	P4HA1
1.89814e-07	1.05756	0.583	0.443	0.00636599	Endo_veins2	PITPNC1
1.86833e-08	1.05501	0.308	0.152	0.000626602	Endo_veins2	IFRD1
1.31091e-06	1.0542	0.109	0.034	0.0439653	Endo_veins2	LFNG
2.64912e-10	1.05296	0.372	0.184	8.88463e-06	Endo_veins2	SREBF2
2.04814e-10	1.04911	0.199	0.065	6.86904e-06	Endo_veins2	CALR
5.30143e-08	1.04411	0.263	0.121	0.00177799	Endo_veins2	RAB8B
1.68402e-10	1.04225	0.596	0.407	5.64787e-06	Endo_veins2	UBE2H
3.32038e-09	1.04224	0.545	0.376	0.000111359	Endo_veins2	STOM
1.06143e-09	1.0401	0.353	0.164	3.55982e-05	Endo_veins2	ADAMTS6
4.11252e-15	1.03345	0.788	0.643	1.37926e-10	Endo_veins2	ABLIM1
2.46156e-17	1.02993	0.41	0.152	8.25558e-13	Endo_veins2	ARID5B
3.37909e-10	1.029	0.654	0.496	1.13328e-05	Endo_veins2	MYO1E
3.79255e-07	1.02662	0.449	0.283	0.0127194	Endo_veins2	ADGRL3
1.51023e-07	1.02376	0.365	0.207	0.00506501	Endo_veins2	HSPB1
4.50595e-14	1.0224	0.744	0.555	1.51121e-09	Endo_veins2	EPB41L4A
4.19662e-08	1.02155	0.282	0.136	0.00140746	Endo_veins2	IL6R
8.94332e-10	1.01708	0.545	0.35	2.99941e-05	Endo_veins2	ARHGEF7
2.37513e-08	1.01612	0.41	0.232	0.000796571	Endo_veins2	ELOVL5
4.5203e-08	1.00689	0.321	0.167	0.00151602	Endo_veins2	ITGA5
1.54861e-08	1.00288	0.301	0.143	0.000519373	Endo_veins2	LRIG1
1.00178e-14	0.997777	0.186	0.043	3.35976e-10	Endo_veins2	PTP4A1
2.25784e-11	0.992953	0.673	0.442	7.57233e-07	Endo_veins2	LDB2
1.37451e-06	0.992403	0.474	0.33	0.0460983	Endo_veins2	LRRFIP1
8.99757e-08	0.991235	0.436	0.277	0.0030176	Endo_veins2	CBLB
9.49587e-09	0.976178	0.609	0.444	0.000318473	Endo_veins2	LYST
3.51402e-07	0.97434	0.256	0.123	0.0117853	Endo_veins2	G3BP2
8.03409e-22	0.96847	0.256	0.055	2.69447e-17	Endo_veins2	HILPDA
9.54746e-07	0.952887	0.462	0.322	0.0320203	Endo_veins2	USP3
8.13228e-14	0.950957	0.212	0.057	2.7274e-09	Endo_veins2	MET
6.55493e-07	0.950734	0.519	0.366	0.0219839	Endo_veins2	DIP2C
4.95704e-18	0.950699	0.885	0.677	1.66249e-13	Endo_veins2	SORBS1
3.94996e-08	0.946557	0.462	0.273	0.00132474	Endo_veins2	RYR3
2.89008e-27	0.93887	0.186	0.023	9.69276e-23	Endo_veins2	PARD6G
1.24541e-10	0.936373	0.25	0.093	4.17685e-06	Endo_veins2	PLEKHH2
8.56783e-24	0.934996	0.122	0.011	2.87348e-19	Endo_veins2	FMO2
3.70614e-08	0.929965	0.186	0.068	0.00124296	Endo_veins2	EPHA6
9.60867e-08	0.925659	0.141	0.045	0.00322256	Endo_veins2	TMEM108
7.44887e-08	0.910679	0.192	0.075	0.0024982	Endo_veins2	PMEPA1
4.64754e-09	0.881998	0.231	0.091	0.000155869	Endo_veins2	TGFB2
3.37185e-09	0.879212	0.141	0.039	0.000113085	Endo_veins2	MMRN1
6.24983e-11	0.878473	0.769	0.618	2.09607e-06	Endo_veins2	ZBTB16
1.15532e-10	0.875547	0.128	0.029	3.87471e-06	Endo_veins2	SEMA3A
1.20288e-06	0.867727	0.385	0.246	0.0403422	Endo_veins2	ACTR3
1.56832e-15	0.865244	0.872	0.668	5.25982e-11	Endo_veins2	PDE4D
1.10648e-06	0.863482	0.564	0.433	0.0371092	Endo_veins2	CYTH1
9.88729e-07	0.857523	0.269	0.135	0.03316	Endo_veins2	IGF2BP2
2.68597e-15	0.854689	0.135	0.023	9.00821e-11	Endo_veins2	CPNE5
1.65614e-07	0.839153	0.333	0.181	0.00555436	Endo_veins2	HSPG2
1.48431e-06	0.836294	0.269	0.137	0.0497807	Endo_veins2	MIR222HG
6.39672e-08	0.82563	0.186	0.07	0.00214533	Endo_veins2	FAM210A
1.0769e-08	0.825053	0.596	0.388	0.00036117	Endo_veins2	CDH11
6.6241e-16	0.820638	0.949	0.922	2.22159e-11	Endo_veins2	NEAT1
1.47603e-08	0.810526	0.333	0.168	0.000495033	Endo_veins2	HBP1
3.09392e-13	0.807295	0.103	0.015	1.03764e-08	Endo_veins2	IGSF9B
3.71139e-08	0.804795	0.212	0.083	0.00124472	Endo_veins2	DHRS3
1.09225e-09	0.786486	0.34	0.155	3.66319e-05	Endo_veins2	DUSP5
8.25147e-08	0.766623	0.372	0.206	0.00276738	Endo_veins2	ATP1A1
1.12929e-08	0.766601	0.41	0.217	0.000378741	Endo_veins2	NKAIN2
5.08439e-08	0.762916	0.141	0.044	0.0017052	Endo_veins2	MSMO1
5.0394e-12	0.758018	0.808	0.618	1.69012e-07	Endo_veins2	PLCB4
3.82291e-09	0.750062	0.853	0.726	0.000128213	Endo_veins2	PRKCH
8.50548e-12	0.745537	0.135	0.029	2.85257e-07	Endo_veins2	HIST1H1D
2.32112e-07	0.722673	0.429	0.257	0.00778458	Endo_veins2	BHLHE40
3.90489e-11	0.722219	0.109	0.021	1.30962e-06	Endo_veins2	AC005258.1
6.40767e-12	0.710486	0.872	0.711	2.14901e-07	Endo_veins2	ANO2
3.51906e-11	0.702704	0.135	0.031	1.18022e-06	Endo_veins2	NINL
1.03496e-06	0.702563	0.173	0.068	0.0347105	Endo_veins2	RELB
3.68107e-07	0.691651	0.474	0.295	0.0123456	Endo_veins2	FOSL2
3.19594e-08	0.691622	0.731	0.614	0.00107186	Endo_veins2	NFIB
1.03872e-08	0.686168	0.141	0.041	0.000348367	Endo_veins2	TESC
9.77846e-07	0.669181	0.679	0.531	0.032795	Endo_veins2	SOX5
2.09427e-10	0.667297	0.115	0.024	7.02377e-06	Endo_veins2	GNA14-AS1
1.30798e-06	0.615268	0.186	0.075	0.043867	Endo_veins2	PTGS2
2.55239e-07	0.604365	0.16	0.057	0.00856022	Endo_veins2	MXD1
1.47802e-06	0.596807	0.231	0.104	0.0495699	Endo_veins2	FAM189A1
1.35515e-06	0.586286	0.423	0.262	0.045449	Endo_veins2	YBX3
9.85396e-09	0.577979	0.16	0.05	0.000330482	Endo_veins2	NUDT4
1.09277e-14	0.518276	0.16	0.032	3.66493e-10	Endo_veins2	AC007952.4
1.33256e-08	0.516117	0.122	0.032	0.000446915	Endo_veins2	BTG3

## Sheet: Endo_veins1
p_val	avg_log2FC	pct.1	pct.2	p_val_adj	cluster	gene
2.20744e-65	2.08003	0.664	0.247	7.40331e-61	Endo_veins1	AFF3
4.22842e-131	2.05561	0.945	0.337	1.41813e-126	Endo_veins1	TSHZ2
7.48626e-126	1.99952	0.702	0.137	2.51074e-121	Endo_veins1	LRRC1
3.48759e-121	1.97529	0.477	0.045	1.16967e-116	Endo_veins1	TLL1
1.1107e-86	1.85715	0.634	0.169	3.72507e-82	Endo_veins1	CDH23
5.74723e-99	1.8315	0.95	0.63	1.92751e-94	Endo_veins1	PDE4D
1.59515e-137	1.82295	0.678	0.103	5.3498e-133	Endo_veins1	ADGRG6
3.29383e-72	1.82212	0.628	0.191	1.10469e-67	Endo_veins1	CACNA1C
8.33777e-97	1.72535	0.579	0.108	2.79632e-92	Endo_veins1	SNTG2
3.5504e-85	1.69552	0.435	0.065	1.19073e-80	Endo_veins1	KCNJ6
2.71739e-73	1.67405	0.65	0.195	9.11359e-69	Endo_veins1	LINC02147
5.49553e-98	1.63046	0.686	0.167	1.84309e-93	Endo_veins1	BNC2
1.43062e-88	1.62247	0.711	0.215	4.79803e-84	Endo_veins1	TRPM6
2.91242e-74	1.59586	0.449	0.083	9.76769e-70	Endo_veins1	KIF26B
2.29889e-77	1.58029	0.713	0.247	7.71002e-73	Endo_veins1	PLA2G4A
1.8122e-102	1.57293	0.691	0.162	6.07775e-98	Endo_veins1	IL1R1
4.2368e-70	1.51197	0.325	0.038	1.42094e-65	Endo_veins1	PKHD1L1
1.05787e-66	1.49183	0.446	0.094	3.54787e-62	Endo_veins1	SAMD5
7.46641e-69	1.4063	0.532	0.133	2.50408e-64	Endo_veins1	CEMIP
9.54957e-56	1.39434	0.369	0.073	3.20274e-51	Endo_veins1	AL033504.1
4.21443e-61	1.38408	0.653	0.232	1.41344e-56	Endo_veins1	TMTC2
4.45366e-70	1.36243	0.672	0.212	1.49367e-65	Endo_veins1	RYR3
1.02736e-69	1.33997	0.548	0.139	3.44555e-65	Endo_veins1	RAMP3
5.95695e-69	1.32872	0.446	0.088	1.99784e-64	Endo_veins1	IL6R
1.1611e-34	1.3258	0.548	0.246	3.89408e-30	Endo_veins1	ADGRL3
1.14726e-59	1.30814	0.537	0.151	3.84767e-55	Endo_veins1	SDK1
3.068e-59	1.27364	0.854	0.469	1.02894e-54	Endo_veins1	FAM155A
7.02821e-63	1.26522	0.804	0.389	2.35712e-58	Endo_veins1	LYST
1.37305e-45	1.22217	0.529	0.178	4.60495e-41	Endo_veins1	SH3RF3
4.91699e-32	1.19294	0.474	0.188	1.64906e-27	Endo_veins1	KCTD8
1.8404e-59	1.19231	0.664	0.229	6.17234e-55	Endo_veins1	ABCC4
3.59022e-48	1.18707	0.912	0.64	1.20409e-43	Endo_veins1	LHFPL6
2.4876e-51	1.17319	0.747	0.337	8.3429e-47	Endo_veins1	CDH11
4.13811e-44	1.17317	0.435	0.127	1.38784e-39	Endo_veins1	ADAMTS6
1.01605e-41	1.13546	0.733	0.379	3.40763e-37	Endo_veins1	PDZRN3
7.27505e-57	1.13221	0.755	0.32	2.43991e-52	Endo_veins1	CMIP
2.21186e-52	1.12437	0.873	0.546	7.41813e-48	Endo_veins1	CADPS2
7.03783e-36	1.1068	0.686	0.352	2.36035e-31	Endo_veins1	PGM5
3.83739e-55	1.1037	0.446	0.107	1.28698e-50	Endo_veins1	PLA1A
4.08222e-47	1.09468	0.355	0.08	1.3691e-42	Endo_veins1	KHDRBS2
1.36152e-52	1.08844	0.733	0.31	4.56627e-48	Endo_veins1	IL4R
2.95609e-34	1.08383	0.567	0.249	9.91413e-30	Endo_veins1	CFH
1.55507e-46	1.07968	0.372	0.09	5.21538e-42	Endo_veins1	TPD52L1
1.18167e-35	1.02255	0.129	0.01	3.96308e-31	Endo_veins1	TPO
3.89071e-55	1.01741	0.939	0.737	1.30487e-50	Endo_veins1	FOXP1
3.48778e-34	1.00691	0.722	0.388	1.16973e-29	Endo_veins1	ADGRL2
6.22367e-17	1.00518	0.154	0.041	2.08729e-12	Endo_veins1	PLCXD3
4.4512e-34	0.984162	0.612	0.281	1.49284e-29	Endo_veins1	PELI2
3.33594e-47	0.971582	0.636	0.246	1.11881e-42	Endo_veins1	RIMS2
2.00714e-49	0.967326	0.256	0.036	6.73155e-45	Endo_veins1	LHX6
2.27156e-42	0.962322	0.741	0.344	7.61836e-38	Endo_veins1	RALGAPA2
1.87476e-45	0.962171	0.314	0.064	6.28756e-41	Endo_veins1	PLEKHH2
2.67186e-27	0.95466	0.689	0.409	8.96087e-23	Endo_veins1	HIPK3
3.07431e-40	0.940367	0.262	0.049	1.03106e-35	Endo_veins1	DNAH14
6.03748e-33	0.924408	0.562	0.244	2.02485e-28	Endo_veins1	ITSN1
1.00273e-32	0.923124	0.884	0.666	3.36296e-28	Endo_veins1	MKL2
1.73891e-41	0.910452	0.267	0.049	5.83196e-37	Endo_veins1	SULT1B1
5.73517e-45	0.903562	0.289	0.054	1.92346e-40	Endo_veins1	OBSCN
1.05472e-16	0.889367	0.413	0.211	3.53733e-12	Endo_veins1	NRXN3
5.11356e-23	0.889072	0.388	0.159	1.71499e-18	Endo_veins1	CPE
6.60307e-38	0.88353	0.917	0.701	2.21454e-33	Endo_veins1	VWF
2.94259e-40	0.8733	0.421	0.122	9.86887e-36	Endo_veins1	ARID5B
1.45045e-20	0.869668	0.51	0.27	4.86452e-16	Endo_veins1	FKBP5
5.14293e-35	0.867782	0.893	0.69	1.72484e-30	Endo_veins1	ANO2
3.0823e-39	0.862614	0.452	0.145	1.03374e-34	Endo_veins1	MVB12B
2.53393e-24	0.853377	0.771	0.498	8.49829e-20	Endo_veins1	PTPRK
1.235e-32	0.849308	0.154	0.019	4.14194e-28	Endo_veins1	FAM19A4
3.60757e-49	0.84116	0.223	0.026	1.20991e-44	Endo_veins1	TSPAN18
8.16883e-29	0.840341	0.54	0.247	2.73966e-24	Endo_veins1	FBXO34
5.47888e-30	0.837689	0.427	0.159	1.83751e-25	Endo_veins1	PITPNM2
3.40115e-28	0.835137	0.457	0.186	1.14068e-23	Endo_veins1	MAP3K8
1.78683e-31	0.817485	0.556	0.245	5.99267e-27	Endo_veins1	MAN1A1
6.86671e-36	0.817019	0.256	0.054	2.30296e-31	Endo_veins1	TRABD2A
4.01672e-26	0.815628	0.391	0.149	1.34713e-21	Endo_veins1	FLVCR2
7.0896e-28	0.809743	0.375	0.133	2.37771e-23	Endo_veins1	SOBP
4.38119e-29	0.809065	0.375	0.128	1.46936e-24	Endo_veins1	ZNF608
6.38681e-27	0.790743	0.631	0.329	2.14201e-22	Endo_veins1	CPD
8.86101e-22	0.783677	0.388	0.164	2.97181e-17	Endo_veins1	RCL1
9.03168e-27	0.78245	0.606	0.308	3.02904e-22	Endo_veins1	SEMA6A
5.81072e-28	0.774618	0.708	0.385	1.9488e-23	Endo_veins1	STOX2
2.08718e-30	0.769762	0.818	0.506	6.99998e-26	Endo_veins1	LDLRAD3
9.73459e-19	0.765059	0.196	0.058	3.26479e-14	Endo_veins1	ADAMTSL3
1.18362e-29	0.764902	0.837	0.543	3.96962e-25	Endo_veins1	PRICKLE2
1.45733e-25	0.76453	0.576	0.287	4.88758e-21	Endo_veins1	PON2
1.15883e-22	0.76037	0.567	0.302	3.88649e-18	Endo_veins1	NOVA1
3.40079e-19	0.759685	0.642	0.381	1.14056e-14	Endo_veins1	TGFBR2
2.1338e-25	0.746346	0.579	0.287	7.15634e-21	Endo_veins1	OSMR
7.00997e-21	0.744683	0.455	0.208	2.351e-16	Endo_veins1	CALCRL
2.3338e-19	0.744638	0.559	0.316	7.8271e-15	Endo_veins1	JAM2
3.46935e-23	0.744079	0.595	0.313	1.16355e-18	Endo_veins1	IL6ST
6.53083e-32	0.740965	0.333	0.096	2.19031e-27	Endo_veins1	ASRGL1
5.65312e-27	0.739813	0.658	0.349	1.89594e-22	Endo_veins1	LEPR
5.32262e-26	0.730848	0.526	0.241	1.7851e-21	Endo_veins1	ZNF521
5.40801e-20	0.729582	0.413	0.185	1.81374e-15	Endo_veins1	PDE7B
3.04499e-25	0.729231	0.532	0.241	1.02123e-20	Endo_veins1	CBLB
7.04602e-30	0.725164	0.399	0.139	2.36309e-25	Endo_veins1	CACHD1
3.12091e-27	0.724612	0.804	0.522	1.04669e-22	Endo_veins1	EPB41L4A
4.82593e-25	0.724605	0.791	0.52	1.61852e-20	Endo_veins1	RPS6KA2
1.93298e-25	0.724293	0.694	0.392	6.48281e-21	Endo_veins1	SLC1A1
3.63844e-26	0.723897	0.419	0.166	1.22026e-21	Endo_veins1	HSD17B4
1.81585e-40	0.722995	0.16	0.014	6.09001e-36	Endo_veins1	AF130417.1
6.21587e-19	0.71925	0.747	0.501	2.08468e-14	Endo_veins1	SOX5
1.34173e-35	0.719035	0.157	0.017	4.4999e-31	Endo_veins1	CFTR
1.497e-19	0.714115	0.694	0.444	5.02062e-15	Endo_veins1	RUNX1T1
1.06006e-24	0.710038	0.35	0.126	3.55523e-20	Endo_veins1	PTPRE
2.47201e-24	0.701298	0.826	0.583	8.29064e-20	Endo_veins1	NFIB
5.82065e-26	0.690799	0.295	0.09	1.95213e-21	Endo_veins1	EPB41L3
3.06261e-20	0.672888	0.493	0.247	1.02714e-15	Endo_veins1	IFNGR1
3.4882e-24	0.671893	0.623	0.326	1.16987e-19	Endo_veins1	SFMBT2
1.20041e-11	0.671515	0.311	0.161	4.02593e-07	Endo_veins1	MACROD2
1.01417e-26	0.670715	0.496	0.212	3.40132e-22	Endo_veins1	GNB4
4.37391e-24	0.670015	0.457	0.197	1.46692e-19	Endo_veins1	C1GALT1
2.93542e-27	0.664642	0.176	0.033	9.84482e-23	Endo_veins1	CYSLTR1
2.71696e-18	0.660865	0.372	0.164	9.11215e-14	Endo_veins1	KCNT2
1.57448e-19	0.659339	0.463	0.226	5.28048e-15	Endo_veins1	PPP1R16B
6.85855e-28	0.658849	0.584	0.279	2.30022e-23	Endo_veins1	JAK2
1.62816e-25	0.657314	0.854	0.588	5.46052e-21	Endo_veins1	PLCB4
7.26427e-26	0.651853	0.628	0.31	2.43629e-21	Endo_veins1	MYOF
4.15167e-17	0.649375	0.223	0.077	1.39239e-12	Endo_veins1	LINC01725
1.54166e-22	0.64847	0.267	0.084	5.17041e-18	Endo_veins1	RNF180
8.11809e-28	0.648324	0.923	0.699	2.72265e-23	Endo_veins1	PRKCH
4.22204e-20	0.646583	0.234	0.073	1.41599e-15	Endo_veins1	C2orf83
1.85098e-12	0.645858	0.138	0.043	6.20781e-08	Endo_veins1	SYNPO2
2.05104e-22	0.643663	0.592	0.301	6.87877e-18	Endo_veins1	CHN1
7.69541e-28	0.642961	0.741	0.404	2.58089e-23	Endo_veins1	LDB2
1.18807e-22	0.641908	0.427	0.179	3.98456e-18	Endo_veins1	ASPH
1.7209e-21	0.641302	0.314	0.114	5.77156e-17	Endo_veins1	IL18R1
1.56795e-21	0.637989	0.758	0.483	5.25859e-17	Endo_veins1	ETV6
4.43634e-20	0.625752	0.295	0.108	1.48786e-15	Endo_veins1	ITGA2
9.7913e-31	0.62512	0.22	0.045	3.28381e-26	Endo_veins1	CYP1B1
1.14452e-09	0.623573	0.281	0.146	3.83847e-05	Endo_veins1	SLC6A6
3.69538e-12	0.621672	0.259	0.116	1.23936e-07	Endo_veins1	MLKL
2.22537e-21	0.610102	0.176	0.042	7.46343e-17	Endo_veins1	ARHGAP20
1.34986e-13	0.607884	0.253	0.105	4.52716e-09	Endo_veins1	PDLIM1
5.22487e-25	0.606191	0.187	0.04	1.75232e-20	Endo_veins1	LINC02249
6.17035e-18	0.602886	0.253	0.09	2.06941e-13	Endo_veins1	HDAC9
6.11441e-24	0.598624	0.212	0.054	2.05065e-19	Endo_veins1	AL109930.1
1.63943e-18	0.59679	0.661	0.4	5.49832e-14	Endo_veins1	CYTH1
1.26549e-19	0.596528	0.565	0.301	4.24421e-15	Endo_veins1	GLIS3
8.71319e-13	0.595368	0.328	0.161	2.92223e-08	Endo_veins1	SESN3
6.16687e-21	0.595324	0.73	0.439	2.06825e-16	Endo_veins1	MCF2L
1.41431e-17	0.594898	0.38	0.174	4.74331e-13	Endo_veins1	DISC1
2.70464e-25	0.590956	0.917	0.76	9.07084e-21	Endo_veins1	ELOVL7
9.46523e-21	0.589435	0.84	0.574	3.17445e-16	Endo_veins1	DNM3
1.61101e-20	0.583437	0.545	0.281	5.403e-16	Endo_veins1	BMP2K
7.89743e-13	0.576103	0.264	0.12	2.64864e-08	Endo_veins1	CNNM2
9.5622e-22	0.575307	0.311	0.112	3.20697e-17	Endo_veins1	AC245297.3
1.6805e-20	0.572457	0.752	0.474	5.63606e-16	Endo_veins1	TEAD1
7.97445e-14	0.564937	0.587	0.353	2.67447e-09	Endo_veins1	CAMK1D
3.55475e-13	0.562918	0.242	0.102	1.19219e-08	Endo_veins1	ALCAM
1.25093e-17	0.560908	0.468	0.23	4.19536e-13	Endo_veins1	PARP9
7.36677e-17	0.560151	0.405	0.195	2.47067e-12	Endo_veins1	ZNF721
4.23625e-17	0.559876	0.512	0.267	1.42075e-12	Endo_veins1	BCAR3
3.34037e-22	0.559191	0.518	0.249	1.12029e-17	Endo_veins1	ACTN1
2.32596e-18	0.559067	0.782	0.519	7.80081e-14	Endo_veins1	PDE10A
4.66873e-15	0.55561	0.369	0.174	1.5658e-10	Endo_veins1	PRSS23
1.67076e-26	0.555572	0.118	0.013	5.60339e-22	Endo_veins1	ACKR1
1.49459e-16	0.554545	0.278	0.11	5.01256e-12	Endo_veins1	TRERF1
1.8413e-19	0.5526	0.824	0.552	6.17536e-15	Endo_veins1	PKP4
6.14295e-19	0.552189	0.529	0.264	2.06022e-14	Endo_veins1	UBE2E2
8.29417e-19	0.550408	0.204	0.061	2.7817e-14	Endo_veins1	WDR35
3.83195e-12	0.550212	0.68	0.465	1.28516e-07	Endo_veins1	NR3C1
3.3831e-18	0.549749	0.463	0.229	1.13462e-13	Endo_veins1	SLC19A3
2.91914e-20	0.541819	0.862	0.672	9.79023e-16	Endo_veins1	BMPR2
1.80442e-15	0.541695	0.242	0.093	6.05168e-11	Endo_veins1	RARB
1.12511e-18	0.540689	0.132	0.028	3.7734e-14	Endo_veins1	SEMA3E
5.29933e-19	0.539796	0.397	0.172	1.77729e-14	Endo_veins1	ABCA1
1.69979e-10	0.538715	0.262	0.13	5.70075e-06	Endo_veins1	AL359220.1
2.33726e-14	0.535272	0.46	0.242	7.83869e-10	Endo_veins1	ADAMTS9
2.00317e-11	0.535027	0.625	0.419	6.71825e-07	Endo_veins1	PITPNC1
2.5432e-16	0.534782	0.628	0.375	8.52939e-12	Endo_veins1	CNTNAP3B
1.85364e-21	0.5325	0.237	0.072	6.21674e-17	Endo_veins1	PRCP
1.74595e-15	0.53231	0.317	0.139	5.85555e-11	Endo_veins1	CD99
1.6769e-18	0.530983	0.694	0.43	5.62399e-14	Endo_veins1	AAK1
2.93848e-17	0.529668	0.716	0.451	9.85508e-13	Endo_veins1	UNC13B
5.26223e-22	0.528923	0.961	0.788	1.76485e-17	Endo_veins1	ABCB1
1.27388e-19	0.527234	0.879	0.633	4.27235e-15	Endo_veins1	FLI1
8.295e-17	0.526496	0.311	0.13	2.78198e-12	Endo_veins1	RAB27A
2.52973e-11	0.523377	0.468	0.271	8.4842e-07	Endo_veins1	HIVEP1
6.72584e-13	0.52316	0.581	0.357	2.25571e-08	Endo_veins1	CCND3
4.56558e-20	0.518584	0.554	0.282	1.5312e-15	Endo_veins1	SMAD9
4.45433e-12	0.516167	0.353	0.181	1.49389e-07	Endo_veins1	MAOA
6.39245e-36	0.5151	0.581	0.229	2.1439e-31	Endo_veins1	NUAK1
4.05689e-21	0.513538	0.135	0.025	1.3606e-16	Endo_veins1	SLC16A7
3.46913e-18	0.513479	0.791	0.528	1.16348e-13	Endo_veins1	TBC1D22A
3.86171e-15	0.512948	0.325	0.145	1.29514e-10	Endo_veins1	CEBPD
1.0596e-16	0.512512	0.573	0.32	3.55368e-12	Endo_veins1	ATG7
3.87497e-17	0.510014	0.576	0.325	1.29959e-12	Endo_veins1	AHCYL2
1.1178e-15	0.50981	0.209	0.073	3.74887e-11	Endo_veins1	ITGA10
3.06399e-17	0.509581	0.821	0.585	1.0276e-12	Endo_veins1	SASH1
1.51269e-23	0.50758	0.372	0.14	5.07325e-19	Endo_veins1	ACSL4
3.7657e-17	0.506678	0.614	0.354	1.26294e-12	Endo_veins1	ARHGEF3
1.95952e-16	0.50618	0.545	0.299	6.57184e-12	Endo_veins1	KANK1
3.48937e-14	0.504562	0.427	0.224	1.17026e-09	Endo_veins1	KLHL2
5.53587e-13	0.504164	0.43	0.238	1.85662e-08	Endo_veins1	TPST2
2.39839e-15	0.503011	0.479	0.255	8.04371e-11	Endo_veins1	RHOBTB1
3.87784e-16	0.502475	0.848	0.603	1.30055e-11	Endo_veins1	TBC1D4
3.9007e-13	0.501863	0.3	0.139	1.30822e-08	Endo_veins1	BAIAP2L1
1.52256e-12	0.501742	0.579	0.358	5.10637e-08	Endo_veins1	SVIL
7.56997e-14	0.500064	0.32	0.151	2.53882e-09	Endo_veins1	SH3BGRL2
2.32077e-12	0.496786	0.413	0.226	7.78338e-08	Endo_veins1	PXN
1.01618e-14	0.491973	0.592	0.364	3.40807e-10	Endo_veins1	NEK7
6.07284e-13	0.489659	0.372	0.192	2.03671e-08	Endo_veins1	PDGFC
3.64113e-13	0.489116	0.328	0.156	1.22116e-08	Endo_veins1	PRKAG2
2.34666e-16	0.48651	0.427	0.211	7.87024e-12	Endo_veins1	HIPK2
8.41823e-14	0.481709	0.479	0.265	2.82331e-09	Endo_veins1	SLC22A23
1.08317e-13	0.479899	0.466	0.251	3.63272e-09	Endo_veins1	HLCS
1.7882e-15	0.475715	0.444	0.225	5.99726e-11	Endo_veins1	PLSCR4
1.02935e-13	0.475371	0.474	0.256	3.45224e-09	Endo_veins1	SULF2
7.45924e-14	0.474401	0.171	0.056	2.50168e-09	Endo_veins1	HS6ST2
4.39349e-12	0.471697	0.292	0.139	1.47349e-07	Endo_veins1	PCAT1
2.54486e-14	0.470885	0.628	0.391	8.53495e-10	Endo_veins1	DENND4C
4.62921e-17	0.47052	0.628	0.363	1.55254e-12	Endo_veins1	SIPA1L1
3.33466e-08	0.47036	0.11	0.04	0.00111838	Endo_veins1	AC244131.2
4.07252e-19	0.469746	0.16	0.039	1.36584e-14	Endo_veins1	LCA5
4.60427e-14	0.468652	0.427	0.225	1.54418e-09	Endo_veins1	JAZF1
3.0343e-27	0.468274	0.163	0.027	1.01764e-22	Endo_veins1	PRSS12
1.39079e-10	0.467188	0.339	0.181	4.66443e-06	Endo_veins1	MYO1B
1.61934e-11	0.46552	0.292	0.142	5.43094e-07	Endo_veins1	EPB41L5
5.16447e-16	0.464217	0.471	0.243	1.73206e-11	Endo_veins1	SH3D19
4.37314e-15	0.462576	0.573	0.335	1.46667e-10	Endo_veins1	FGD6
6.50737e-16	0.461274	0.603	0.357	2.18244e-11	Endo_veins1	ZNF423
8.2318e-11	0.460635	0.493	0.306	2.76078e-06	Endo_veins1	CCSER1
9.06067e-18	0.460446	0.38	0.171	3.03877e-13	Endo_veins1	FENDRR
6.30768e-14	0.459015	0.678	0.44	2.11547e-09	Endo_veins1	SRGAP2
1.90595e-16	0.458872	0.711	0.452	6.39217e-12	Endo_veins1	STK3
3.03692e-13	0.458503	0.433	0.232	1.01852e-08	Endo_veins1	RAB30
6.32474e-12	0.457794	0.691	0.473	2.12119e-07	Endo_veins1	STXBP6
7.1045e-16	0.456496	0.408	0.196	2.38271e-11	Endo_veins1	ATP10D
1.47942e-14	0.450186	0.813	0.576	4.96167e-10	Endo_veins1	SGMS1
2.34946e-10	0.448799	0.526	0.323	7.87963e-06	Endo_veins1	RASSF8
7.94068e-12	0.447545	0.435	0.242	2.66314e-07	Endo_veins1	LINC00623
2.00507e-14	0.447466	0.311	0.14	6.7246e-10	Endo_veins1	SLC4A7
1.38174e-13	0.44732	0.625	0.374	4.63407e-09	Endo_veins1	JARID2
9.36346e-13	0.44647	0.741	0.52	3.14032e-08	Endo_veins1	AGFG1
4.9062e-18	0.442786	0.251	0.088	1.64544e-13	Endo_veins1	SLCO2A1
5.04646e-16	0.441498	0.215	0.074	1.69248e-11	Endo_veins1	DCBLD2
4.62816e-15	0.441237	0.639	0.383	1.55219e-10	Endo_veins1	HIF3A
6.44119e-15	0.439779	0.854	0.639	2.16025e-10	Endo_veins1	NCOA1
4.17543e-14	0.439766	0.457	0.241	1.40036e-09	Endo_veins1	MAPKAP1
1.65097e-11	0.436747	0.264	0.121	5.53703e-07	Endo_veins1	IGF2BP2
1.66103e-09	0.436218	0.309	0.165	5.57075e-05	Endo_veins1	GALNT17
5.08791e-20	0.435373	0.275	0.095	1.70638e-15	Endo_veins1	COG7
1.62499e-14	0.431805	0.303	0.134	5.44988e-10	Endo_veins1	SUFU
2.05756e-16	0.430454	0.339	0.146	6.90064e-12	Endo_veins1	CARMIL1
8.76242e-12	0.428881	0.353	0.183	2.93874e-07	Endo_veins1	GAK
7.46417e-07	0.427126	0.185	0.096	0.0250333	Endo_veins1	LINC01266
4.34434e-16	0.426084	0.474	0.243	1.457e-11	Endo_veins1	MGAT4A
1.87215e-11	0.425971	0.559	0.341	6.27881e-07	Endo_veins1	DIP2C
3.86533e-17	0.425213	0.309	0.125	1.29636e-12	Endo_veins1	SPNS2
2.59509e-15	0.424271	0.207	0.072	8.70341e-11	Endo_veins1	CYP1B1-AS1
9.37317e-19	0.424195	0.281	0.102	3.14357e-14	Endo_veins1	GRAMD1A
3.95727e-13	0.422707	0.529	0.313	1.32719e-08	Endo_veins1	MAN1A2
9.69978e-13	0.420403	0.62	0.393	3.25311e-08	Endo_veins1	RBMS1
9.40182e-17	0.419819	0.281	0.11	3.15318e-12	Endo_veins1	DMXL2
4.36679e-13	0.419611	0.807	0.585	1.46453e-08	Endo_veins1	RERE
3.58272e-11	0.418951	0.466	0.271	1.20157e-06	Endo_veins1	AFAP1L2
3.49456e-08	0.418812	0.168	0.076	0.00117201	Endo_veins1	RERG
9.05082e-10	0.418124	0.452	0.27	3.03546e-05	Endo_veins1	RREB1
1.31717e-12	0.417474	0.245	0.103	4.41753e-08	Endo_veins1	PARP11
2.84822e-15	0.415351	0.372	0.176	9.55237e-11	Endo_veins1	SMAD1
1.28287e-13	0.413948	0.617	0.365	4.3025e-09	Endo_veins1	RNF115
3.04557e-12	0.413424	0.163	0.056	1.02142e-07	Endo_veins1	TMEM241
9.24804e-15	0.413033	0.871	0.627	3.10161e-10	Endo_veins1	TTC28
5.78226e-12	0.412726	0.273	0.126	1.93925e-07	Endo_veins1	FAR2
5.61498e-14	0.411123	0.179	0.06	1.88315e-09	Endo_veins1	TMTC4
2.01634e-11	0.41105	0.251	0.114	6.7624e-07	Endo_veins1	NFATC2IP
1.4087e-15	0.410823	0.667	0.407	4.72451e-11	Endo_veins1	RBMS3
1.13947e-13	0.409468	0.317	0.146	3.82156e-09	Endo_veins1	IFNGR2
1.91055e-11	0.409079	0.865	0.712	6.40759e-07	Endo_veins1	MYRIP
1.41759e-14	0.408022	0.157	0.047	4.75431e-10	Endo_veins1	EYA2
7.0451e-14	0.407891	0.204	0.074	2.36278e-09	Endo_veins1	ME1
8.9848e-14	0.40525	0.107	0.025	3.01332e-09	Endo_veins1	DNAH5
7.39893e-12	0.404976	0.364	0.19	2.48145e-07	Endo_veins1	MBOAT2
3.45798e-10	0.404902	0.427	0.25	1.15974e-05	Endo_veins1	TMEM135
7.75865e-12	0.40457	0.421	0.232	2.60209e-07	Endo_veins1	TMEM87B
2.30602e-11	0.403952	0.325	0.163	7.73394e-07	Endo_veins1	GATA2-AS1
1.81608e-10	0.403297	0.314	0.161	6.09077e-06	Endo_veins1	RGS12
6.48438e-14	0.403238	0.799	0.568	2.17473e-09	Endo_veins1	RASAL2
2.49066e-12	0.402795	0.501	0.291	8.35318e-08	Endo_veins1	ST3GAL6
2.12167e-07	0.402382	0.152	0.069	0.00711567	Endo_veins1	UNC5C
2.87065e-11	0.401305	0.38	0.204	9.62758e-07	Endo_veins1	SIPA1L3
9.05646e-13	0.401176	0.455	0.251	3.03736e-08	Endo_veins1	GSE1
3.44818e-10	0.400909	0.171	0.069	1.15645e-05	Endo_veins1	MTUS2
3.33087e-17	0.400829	0.143	0.035	1.11711e-12	Endo_veins1	BHMT2
1.32962e-13	0.400579	0.124	0.033	4.45929e-09	Endo_veins1	DLL1
2.68961e-11	0.399746	0.865	0.692	9.02041e-07	Endo_veins1	TJP1
2.06781e-15	0.399169	0.336	0.15	6.93502e-11	Endo_veins1	TTC7A
2.39449e-10	0.397039	0.196	0.083	8.03064e-06	Endo_veins1	RALGPS2
1.01462e-09	0.394766	0.504	0.316	3.40282e-05	Endo_veins1	SSH2
3.55822e-12	0.393175	0.521	0.302	1.19336e-07	Endo_veins1	NSMCE2
1.12563e-14	0.392117	0.185	0.06	3.77514e-10	Endo_veins1	CSNK2A2
1.0589e-10	0.391571	0.793	0.596	3.55134e-06	Endo_veins1	ZBTB16
4.75894e-20	0.391059	0.113	0.018	1.59605e-15	Endo_veins1	INMT
1.29543e-11	0.389239	0.372	0.195	4.34462e-07	Endo_veins1	PPP2R5A
7.01548e-10	0.389044	0.193	0.083	2.35285e-05	Endo_veins1	SLC26A2
3.78726e-12	0.386867	0.264	0.118	1.27017e-07	Endo_veins1	TM6SF1
4.44868e-08	0.386179	0.165	0.074	0.001492	Endo_veins1	SNTB2
8.09635e-13	0.383633	0.719	0.458	2.71535e-08	Endo_veins1	CEMIP2
1.05633e-10	0.383305	0.201	0.084	3.5427e-06	Endo_veins1	UCK2
5.88938e-15	0.382105	0.127	0.031	1.97518e-10	Endo_veins1	MCUB
7.91237e-13	0.38136	0.499	0.279	2.65365e-08	Endo_veins1	ENTPD1
4.73951e-09	0.381295	0.284	0.147	0.000158954	Endo_veins1	PDE9A
1.73477e-11	0.380814	0.118	0.035	5.81807e-07	Endo_veins1	MMP16
1.84581e-12	0.37979	0.59	0.349	6.19049e-08	Endo_veins1	NRP1
1.98281e-14	0.378565	0.248	0.098	6.64994e-10	Endo_veins1	GPATCH2
3.68936e-11	0.376767	0.391	0.213	1.23734e-06	Endo_veins1	PDE4B
6.83445e-10	0.376729	0.895	0.741	2.29214e-05	Endo_veins1	LRMDA
1.43035e-12	0.374323	0.543	0.326	4.7971e-08	Endo_veins1	WWP1
9.16129e-08	0.373605	0.207	0.103	0.00307251	Endo_veins1	CP
3.29443e-14	0.373134	0.642	0.399	1.10488e-09	Endo_veins1	CHSY1
3.45335e-13	0.372665	0.248	0.102	1.15818e-08	Endo_veins1	LRP5
2.39654e-09	0.371948	0.132	0.048	8.0375e-05	Endo_veins1	NAXD
2.00611e-08	0.371649	0.333	0.194	0.000672811	Endo_veins1	CHST11
6.72568e-09	0.37057	0.102	0.033	0.000225566	Endo_veins1	C8orf37-AS1
2.07629e-08	0.370357	0.342	0.196	0.000696345	Endo_veins1	ATF2
1.71874e-10	0.369248	0.424	0.247	5.7643e-06	Endo_veins1	PPP2R5C
1.11672e-11	0.365221	0.251	0.112	3.74526e-07	Endo_veins1	NAA25
1.43707e-15	0.364623	0.129	0.031	4.81965e-11	Endo_veins1	MPZL2
6.10294e-10	0.363977	0.689	0.478	2.0468e-05	Endo_veins1	CSNK1A1
2.11252e-11	0.363201	0.391	0.208	7.08495e-07	Endo_veins1	SLC12A6
3.4011e-11	0.362628	0.567	0.35	1.14066e-06	Endo_veins1	TRAPPC9
3.20202e-14	0.359848	0.661	0.4	1.07389e-09	Endo_veins1	NOSTRIN
2.53075e-10	0.358448	0.24	0.11	8.48764e-06	Endo_veins1	ARHGAP35
2.18054e-09	0.357164	0.441	0.264	7.31311e-05	Endo_veins1	SIK2
4.98383e-11	0.355687	0.105	0.029	1.67148e-06	Endo_veins1	CDH6
3.99821e-09	0.355145	0.405	0.239	0.000134092	Endo_veins1	STIM2
8.63125e-07	0.35474	0.256	0.147	0.0289475	Endo_veins1	MID1
3.01394e-09	0.352718	0.57	0.379	0.000101082	Endo_veins1	PHIP
1.12206e-10	0.35235	0.201	0.084	3.76316e-06	Endo_veins1	NUDCD1
1.72499e-07	0.352083	0.207	0.104	0.00578526	Endo_veins1	FAM124A
3.09365e-10	0.350271	0.548	0.344	1.03755e-05	Endo_veins1	TBCD
9.95092e-17	0.350052	0.105	0.019	3.33734e-12	Endo_veins1	CNR1
3.67509e-11	0.347833	0.157	0.057	1.23255e-06	Endo_veins1	ZC3H3
7.32953e-11	0.34752	0.196	0.081	2.45818e-06	Endo_veins1	ANXA4
1.86936e-07	0.347463	0.212	0.109	0.00626946	Endo_veins1	OSMR-AS1
1.57185e-12	0.347289	0.59	0.354	5.27167e-08	Endo_veins1	MAGI2
3.37718e-11	0.347091	0.275	0.13	1.13264e-06	Endo_veins1	ENOSF1
1.38723e-12	0.344473	0.149	0.047	4.65248e-08	Endo_veins1	ITGB4
4.03222e-09	0.344374	0.631	0.434	0.000135233	Endo_veins1	PIK3C2A
3.76875e-15	0.34415	0.229	0.082	1.26396e-10	Endo_veins1	GEMIN5
5.62458e-12	0.344123	0.198	0.078	1.88637e-07	Endo_veins1	DNMBP
6.57865e-11	0.343792	0.521	0.318	2.20635e-06	Endo_veins1	VEZT
1.02107e-09	0.343179	0.515	0.324	3.42447e-05	Endo_veins1	ARFGEF1
3.48897e-12	0.342761	0.185	0.068	1.17013e-07	Endo_veins1	SH3RF2
8.0526e-10	0.341953	0.196	0.086	2.70068e-05	Endo_veins1	ORC5
6.15882e-08	0.341699	0.163	0.073	0.00206555	Endo_veins1	APLF
1.23095e-09	0.341242	0.658	0.444	4.12834e-05	Endo_veins1	TCF7L2
2.73568e-09	0.341202	0.107	0.035	9.17492e-05	Endo_veins1	HFM1
7.39392e-09	0.341169	0.545	0.353	0.000247977	Endo_veins1	RASA2
8.76975e-11	0.340237	0.364	0.191	2.9412e-06	Endo_veins1	SHE
3.51528e-09	0.339105	0.405	0.241	0.000117896	Endo_veins1	JPX
3.78529e-11	0.33819	0.623	0.399	1.26951e-06	Endo_veins1	LAMA3
5.08968e-07	0.337856	0.218	0.116	0.0170698	Endo_veins1	SUGP2
1.91184e-12	0.335598	0.289	0.132	6.41191e-08	Endo_veins1	UBN1
6.6672e-10	0.33467	0.231	0.107	2.23605e-05	Endo_veins1	C18orf25
6.86665e-08	0.334314	0.14	0.059	0.00230294	Endo_veins1	ACSS2
3.44313e-11	0.333562	0.565	0.342	1.15476e-06	Endo_veins1	PTEN
2.68154e-15	0.333234	0.124	0.029	8.99334e-11	Endo_veins1	LY96
3.83676e-09	0.332164	0.231	0.111	0.000128677	Endo_veins1	R3HCC1L
1.60359e-09	0.33149	0.545	0.342	5.37812e-05	Endo_veins1	GMDS-DT
1.48325e-11	0.3311	0.259	0.117	4.97452e-07	Endo_veins1	L3MBTL4
5.08031e-08	0.32944	0.857	0.679	0.00170384	Endo_veins1	ASAP1
2.03735e-09	0.32835	0.554	0.356	6.83285e-05	Endo_veins1	EHMT1
2.4412e-13	0.328003	0.518	0.281	8.1873e-09	Endo_veins1	SRGAP2B
1.38676e-10	0.325807	0.455	0.263	4.6509e-06	Endo_veins1	SUCLG2
7.29135e-08	0.325694	0.455	0.296	0.00244537	Endo_veins1	PRELID2
1.77425e-09	0.325594	0.457	0.275	5.95049e-05	Endo_veins1	ARFIP1
6.97913e-09	0.325336	0.355	0.2	0.000234066	Endo_veins1	ARHGAP32
2.10766e-10	0.324906	0.455	0.268	7.06867e-06	Endo_veins1	RBM33
1.57067e-10	0.324788	0.196	0.082	5.2677e-06	Endo_veins1	TGFB2
4.42626e-11	0.324495	0.59	0.377	1.48448e-06	Endo_veins1	FHIT
6.84966e-09	0.323787	0.262	0.134	0.000229724	Endo_veins1	SCAI
1.01354e-09	0.323705	0.634	0.424	3.3992e-05	Endo_veins1	PHKB
1.32961e-09	0.323594	0.231	0.109	4.45926e-05	Endo_veins1	PSMD14
6.47484e-09	0.323333	0.262	0.135	0.000217153	Endo_veins1	DEAF1
4.57251e-09	0.322898	0.857	0.689	0.000153353	Endo_veins1	FTX
9.83915e-10	0.322691	0.73	0.512	3.29985e-05	Endo_veins1	CUX1
2.27037e-09	0.322633	0.722	0.523	7.61438e-05	Endo_veins1	BBS9
1.73836e-11	0.321464	0.719	0.502	5.83011e-07	Endo_veins1	CPNE8
2.48347e-12	0.32104	0.132	0.04	8.32905e-08	Endo_veins1	CMTM7
7.31524e-10	0.31891	0.383	0.213	2.45339e-05	Endo_veins1	OLA1
6.99379e-09	0.318356	0.256	0.131	0.000234558	Endo_veins1	YPEL2
4.30028e-08	0.318101	0.187	0.088	0.00144223	Endo_veins1	TBC1D14
3.96256e-09	0.317616	0.314	0.17	0.000132896	Endo_veins1	FAM222B
1.90204e-08	0.317615	0.129	0.049	0.000637906	Endo_veins1	MAN1C1
4.42426e-09	0.317482	0.388	0.224	0.000148381	Endo_veins1	ABCD3
2.21463e-10	0.317107	0.358	0.19	7.42744e-06	Endo_veins1	SLC39A11
1.79503e-11	0.317069	0.105	0.028	6.02017e-07	Endo_veins1	CTSC
6.35714e-07	0.316012	0.163	0.078	0.0213206	Endo_veins1	ZC3H18
5.0128e-09	0.315953	0.488	0.305	0.000168119	Endo_veins1	CAMSAP2
8.0655e-14	0.315791	0.253	0.102	2.70501e-09	Endo_veins1	HMGN3
8.0298e-10	0.315556	0.424	0.243	2.69304e-05	Endo_veins1	AHI1
1.01029e-06	0.31553	0.138	0.063	0.0338833	Endo_veins1	FAM20B
1.681e-09	0.315423	0.215	0.097	5.63773e-05	Endo_veins1	IREB2
1.74646e-12	0.313927	0.821	0.576	5.85729e-08	Endo_veins1	MAGI1
8.83486e-12	0.313313	0.174	0.063	2.96303e-07	Endo_veins1	CBLL1
4.53589e-07	0.313283	0.612	0.434	0.0152125	Endo_veins1	PTPN14
8.34194e-09	0.31314	0.656	0.468	0.000279772	Endo_veins1	LRBA
8.07143e-11	0.312869	0.19	0.077	2.707e-06	Endo_veins1	IL15
6.90596e-08	0.312288	0.248	0.132	0.00231612	Endo_veins1	PEX14
1.15319e-06	0.312052	0.361	0.228	0.0386756	Endo_veins1	DIS3L2
2.38456e-09	0.310695	0.369	0.208	7.99732e-05	Endo_veins1	RNF217
2.98555e-11	0.310362	0.38	0.201	1.00129e-06	Endo_veins1	GNA14
5.01876e-10	0.307345	0.771	0.521	1.68319e-05	Endo_veins1	LMBR1
6.8594e-09	0.306326	0.289	0.152	0.00023005	Endo_veins1	HACE1
6.10448e-07	0.306301	0.444	0.287	0.0204732	Endo_veins1	UBE2K
5.74091e-10	0.306235	0.185	0.078	1.92539e-05	Endo_veins1	SLC7A6
4.78159e-10	0.306117	0.22	0.099	1.60365e-05	Endo_veins1	KLHL3
5.17864e-08	0.305705	0.399	0.234	0.00173681	Endo_veins1	SRGAP2C
2.28927e-10	0.305455	0.46	0.267	7.67774e-06	Endo_veins1	THADA
2.51858e-07	0.305366	0.176	0.086	0.00844682	Endo_veins1	PPM1F
4.925e-09	0.304765	0.738	0.527	0.000165174	Endo_veins1	MBD5
1.10133e-07	0.303242	0.639	0.449	0.00369364	Endo_veins1	ARNT2
3.61792e-09	0.302864	0.204	0.093	0.000121338	Endo_veins1	ZDHHC3
9.64093e-07	0.302561	0.262	0.15	0.0323338	Endo_veins1	TNXB
2.23523e-09	0.302266	0.135	0.05	7.49653e-05	Endo_veins1	ABLIM2
2.07089e-08	0.302129	0.229	0.115	0.000694535	Endo_veins1	ARSB
1.37862e-11	0.300699	0.369	0.191	4.6236e-07	Endo_veins1	MAD1L1
8.23076e-12	0.300654	0.424	0.227	2.76043e-07	Endo_veins1	IFI16
9.41996e-07	0.299385	0.485	0.326	0.0315926	Endo_veins1	SHROOM4
4.58385e-08	0.297595	0.818	0.652	0.00153733	Endo_veins1	FRYL
4.24371e-11	0.296562	0.399	0.217	1.42326e-06	Endo_veins1	DCAF5
4.62332e-11	0.295724	0.433	0.234	1.55057e-06	Endo_veins1	CDYL
4.13266e-07	0.295452	0.366	0.221	0.0138601	Endo_veins1	ARMH3
1.23294e-09	0.295124	0.377	0.214	4.13505e-05	Endo_veins1	RNF145
2.01889e-07	0.294841	0.143	0.063	0.00677094	Endo_veins1	SETDB2
4.53106e-08	0.293957	0.303	0.171	0.00151963	Endo_veins1	SSBP3
2.12244e-09	0.293015	0.22	0.103	7.11824e-05	Endo_veins1	NUCB2
4.1005e-11	0.292286	0.826	0.618	1.37523e-06	Endo_veins1	ARID1B
3.30207e-10	0.292199	0.209	0.091	1.10745e-05	Endo_veins1	SPAAR
2.8172e-07	0.29219	0.14	0.062	0.00944831	Endo_veins1	PDSS1
1.74165e-07	0.2912	0.421	0.264	0.00584116	Endo_veins1	HPCAL1
1.14836e-08	0.288321	0.579	0.375	0.000385138	Endo_veins1	SHANK3
6.7929e-09	0.286093	0.388	0.224	0.00022782	Endo_veins1	NUTM2A-AS1
1.17278e-08	0.285985	0.419	0.257	0.000393326	Endo_veins1	OSBPL9
5.7599e-07	0.285683	0.157	0.073	0.0193175	Endo_veins1	MAMLD1
1.28937e-07	0.285417	0.353	0.209	0.00432428	Endo_veins1	NHSL1
1.49243e-08	0.284813	0.408	0.243	0.000500533	Endo_veins1	TLK1
3.45128e-09	0.284138	0.399	0.231	0.000115749	Endo_veins1	RNGTT
8.4534e-08	0.282904	0.24	0.124	0.0028351	Endo_veins1	PRIM2
3.17563e-08	0.282857	0.138	0.055	0.00106504	Endo_veins1	ZNF736
8.0969e-10	0.282663	0.325	0.17	2.71554e-05	Endo_veins1	APPBP2
8.65142e-08	0.282609	0.187	0.089	0.00290151	Endo_veins1	AC008537.1
1.17802e-08	0.282402	0.32	0.177	0.000395084	Endo_veins1	FANCC
1.04699e-10	0.282374	0.152	0.054	3.51138e-06	Endo_veins1	MIPEP
1.2101e-08	0.28173	0.493	0.307	0.000405843	Endo_veins1	ZNF148
4.44383e-10	0.281336	0.298	0.15	1.49037e-05	Endo_veins1	TNFRSF1B
9.89692e-09	0.280886	0.333	0.188	0.000331923	Endo_veins1	CRTC3
1.05851e-08	0.280724	0.868	0.677	0.000355005	Endo_veins1	CCNY
2.49103e-10	0.28055	0.347	0.184	8.3544e-06	Endo_veins1	ATXN7L1
1.01819e-07	0.280483	0.121	0.048	0.00341481	Endo_veins1	MAP3K7CL
6.23091e-09	0.280474	0.391	0.228	0.000208972	Endo_veins1	GPBP1L1
1.3241e-07	0.280473	0.174	0.081	0.00444078	Endo_veins1	GOLGA1
3.20385e-09	0.280355	0.311	0.165	0.000107451	Endo_veins1	SPTLC2
2.61758e-08	0.279903	0.165	0.072	0.000877882	Endo_veins1	SPATA6L
1.01361e-07	0.27856	0.386	0.231	0.00339946	Endo_veins1	FAM120A
2.01096e-07	0.278457	0.416	0.259	0.00674436	Endo_veins1	NCOA7
5.11075e-08	0.278368	0.372	0.223	0.00171404	Endo_veins1	SUN1
7.25392e-07	0.27757	0.253	0.14	0.0243282	Endo_veins1	CCDC88C
3.22683e-08	0.276663	0.466	0.291	0.00108222	Endo_veins1	ZFYVE28
3.45202e-10	0.275777	0.449	0.259	1.15774e-05	Endo_veins1	FAM49B
2.19876e-09	0.275654	0.11	0.036	7.37422e-05	Endo_veins1	TRIM14
6.24612e-08	0.275385	0.35	0.208	0.00209482	Endo_veins1	EEA1
2.92395e-07	0.274949	0.165	0.078	0.00980634	Endo_veins1	HUS1
2.70905e-09	0.274437	0.281	0.144	9.0856e-05	Endo_veins1	ARMCX4
1.51089e-08	0.273223	0.636	0.433	0.000506724	Endo_veins1	PIAS1
1.52169e-09	0.273134	0.846	0.629	5.10344e-05	Endo_veins1	GALNT18
3.60783e-07	0.273132	0.251	0.136	0.0121	Endo_veins1	ADCY9
3.27249e-09	0.27289	0.485	0.289	0.000109753	Endo_veins1	TBCK
1.82164e-08	0.2727	0.157	0.067	0.000610942	Endo_veins1	C3orf58
2.00986e-08	0.272029	0.496	0.312	0.000674068	Endo_veins1	TLK2
8.45759e-07	0.270195	0.226	0.124	0.0283651	Endo_veins1	NT5C3A
2.18863e-08	0.270042	0.102	0.035	0.000734021	Endo_veins1	EPS8L2
4.85165e-09	0.269925	0.295	0.155	0.000162715	Endo_veins1	AL365273.2
1.7513e-11	0.269784	0.617	0.397	5.8735e-07	Endo_veins1	PARP14
1.57992e-09	0.26867	0.697	0.471	5.29874e-05	Endo_veins1	PARD3
1.09588e-09	0.2682	0.421	0.238	3.67536e-05	Endo_veins1	RPTOR
4.85296e-08	0.267121	0.262	0.138	0.00162759	Endo_veins1	RBMS3-AS3
9.51436e-08	0.266972	0.457	0.295	0.00319093	Endo_veins1	PTPRA
1.31094e-12	0.266476	0.132	0.039	4.39663e-08	Endo_veins1	TPD52
4.54989e-09	0.266412	0.22	0.104	0.000152594	Endo_veins1	BTBD1
5.7076e-10	0.264217	0.256	0.121	1.91422e-05	Endo_veins1	MOB2
8.08545e-09	0.263967	0.19	0.085	0.00027117	Endo_veins1	CLIC2
2.92781e-09	0.262668	0.504	0.309	9.8193e-05	Endo_veins1	DIP2B
6.81281e-10	0.262252	0.427	0.247	2.28488e-05	Endo_veins1	SCAMP1
3.4366e-08	0.26215	0.22	0.11	0.00115257	Endo_veins1	DDX42
5.22547e-07	0.261912	0.118	0.048	0.0175252	Endo_veins1	CALCOCO1
1.12206e-10	0.261609	0.127	0.041	3.76318e-06	Endo_veins1	DOK5
1.02468e-07	0.261411	0.231	0.119	0.00343659	Endo_veins1	CNTNAP3
1.60506e-09	0.261073	0.171	0.07	5.38306e-05	Endo_veins1	C11orf80
7.04864e-08	0.260987	0.65	0.463	0.00236397	Endo_veins1	ATRX
2.84159e-09	0.260982	0.231	0.111	9.53011e-05	Endo_veins1	SH3BP5
2.24698e-07	0.260497	0.642	0.456	0.00753593	Endo_veins1	VPS13B
3.09286e-07	0.259836	0.281	0.158	0.0103728	Endo_veins1	GLYR1
7.12229e-10	0.259577	0.427	0.241	2.38867e-05	Endo_veins1	ZHX3
1.03473e-07	0.258739	0.24	0.125	0.00347027	Endo_veins1	GLCE
1.48041e-06	0.258425	0.388	0.253	0.0496501	Endo_veins1	FAXDC2
2.40808e-09	0.258133	0.603	0.396	8.07622e-05	Endo_veins1	ETS2
1.48073e-10	0.257917	0.127	0.041	4.96606e-06	Endo_veins1	KIAA1522
1.18259e-07	0.257894	0.135	0.056	0.00396618	Endo_veins1	KCNQ1OT1
3.9949e-08	0.257777	0.281	0.15	0.00133981	Endo_veins1	NPLOC4
2.03067e-07	0.256497	0.587	0.404	0.00681048	Endo_veins1	NCOR1
1.00352e-06	0.255949	0.16	0.076	0.033656	Endo_veins1	RNF125
9.36143e-09	0.255853	0.457	0.285	0.000313964	Endo_veins1	ZMYND8
6.86237e-08	0.255689	0.521	0.336	0.0023015	Endo_veins1	SETX
4.01577e-07	0.255139	0.565	0.386	0.0134681	Endo_veins1	MYO9A
1.35007e-06	0.254433	0.813	0.62	0.0452786	Endo_veins1	NXN
1.67685e-08	0.254105	0.57	0.389	0.000562381	Endo_veins1	USP53
9.86036e-08	0.253693	0.482	0.308	0.00330697	Endo_veins1	NPEPPS
2.30907e-08	0.253397	0.146	0.06	0.000774414	Endo_veins1	TMEM267
3.13923e-07	0.252833	0.185	0.091	0.0105284	Endo_veins1	OXCT1
9.98886e-07	0.252309	0.182	0.093	0.0335006	Endo_veins1	ANXA11
6.92983e-08	0.251848	0.212	0.105	0.00232412	Endo_veins1	MAU2
2.20743e-10	0.251801	0.267	0.127	7.40328e-06	Endo_veins1	ACVR2A
3.0203e-08	0.251775	0.209	0.099	0.00101295	Endo_veins1	ANXA2
2.63229e-08	0.251697	0.788	0.595	0.000882816	Endo_veins1	MED13L
4.5612e-08	0.251511	0.262	0.138	0.00152974	Endo_veins1	JAG1
1.75084e-11	0.250405	0.179	0.067	5.87198e-07	Endo_veins1	PUS10
7.08784e-11	0.250382	0.127	0.04	2.37712e-06	Endo_veins1	TNFSF13B

## Sheet: Endo_capillaries
p_val	avg_log2FC	pct.1	pct.2	p_val_adj	cluster	gene
1.00552e-107	2.17451	0.517	0.077	3.37232e-103	Endo_capillaries	TMEM132C
3.57768e-131	2.12551	0.771	0.345	1.19988e-126	Endo_capillaries	SLC39A10
4.92873e-83	1.95647	0.547	0.169	1.653e-78	Endo_capillaries	SPOCK3
6.17806e-80	1.90971	0.425	0.074	2.072e-75	Endo_capillaries	ITIH5
5.98807e-76	1.89992	0.476	0.129	2.00828e-71	Endo_capillaries	SLCO1A2
5.53319e-73	1.81424	0.404	0.07	1.85572e-68	Endo_capillaries	NCALD
7.11258e-77	1.74413	0.576	0.234	2.38542e-72	Endo_capillaries	NPIPB5
2.84947e-61	1.70605	0.334	0.054	9.55655e-57	Endo_capillaries	GPR85
4.74985e-38	1.61564	0.315	0.097	1.593e-33	Endo_capillaries	TTN
1.52113e-114	1.61508	0.798	0.363	5.10156e-110	Endo_capillaries	SLC7A5
2.33991e-84	1.59361	0.569	0.185	7.84758e-80	Endo_capillaries	BTNL9
2.08836e-80	1.52364	0.735	0.444	7.00394e-76	Endo_capillaries	PPFIBP1
3.64863e-45	1.48316	0.287	0.059	1.22368e-40	Endo_capillaries	RASGRP3
1.54059e-32	1.47349	0.324	0.12	5.16682e-28	Endo_capillaries	HIF1A-AS2
1.18472e-67	1.47171	0.509	0.171	3.97331e-63	Endo_capillaries	BSG
1.945e-52	1.45493	0.234	0.013	6.52313e-48	Endo_capillaries	CA4
2.96361e-46	1.4341	0.366	0.105	9.93935e-42	Endo_capillaries	HMCN1
3.24989e-73	1.4318	0.629	0.27	1.08995e-68	Endo_capillaries	ADGRF5
7.90326e-92	1.42403	0.81	0.505	2.6506e-87	Endo_capillaries	SYNE1
2.82079e-45	1.4185	0.358	0.106	9.46038e-41	Endo_capillaries	EPHA3
1.00055e-55	1.41281	0.421	0.129	3.35565e-51	Endo_capillaries	SPOCK2
9.5637e-59	1.40318	0.635	0.327	3.20747e-54	Endo_capillaries	TSPAN5
1.479e-50	1.3908	0.579	0.314	4.96028e-46	Endo_capillaries	MYO10
3.83544e-46	1.3864	0.531	0.267	1.28633e-41	Endo_capillaries	DLC1
6.65697e-29	1.37774	0.406	0.194	2.23261e-24	Endo_capillaries	MT2A
3.75869e-54	1.37399	0.529	0.219	1.26059e-49	Endo_capillaries	ZNF385B
1.15462e-81	1.36397	0.756	0.421	3.87235e-77	Endo_capillaries	ABCG2
1.38756e-37	1.3512	0.411	0.179	4.6536e-33	Endo_capillaries	TMSB10
2.44772e-25	1.33534	0.165	0.03	8.20916e-21	Endo_capillaries	RGS5
7.09397e-65	1.31689	0.667	0.351	2.37918e-60	Endo_capillaries	CLDN5
8.36187e-56	1.30148	0.716	0.466	2.8044e-51	Endo_capillaries	ST6GAL1
1.03681e-28	1.29883	0.194	0.04	3.47726e-24	Endo_capillaries	CCDC141
3.30773e-66	1.29881	0.704	0.406	1.10935e-61	Endo_capillaries	CGNL1
4.84983e-43	1.28724	0.532	0.273	1.62654e-38	Endo_capillaries	MGAT5
1.45614e-48	1.28628	0.483	0.204	4.88359e-44	Endo_capillaries	SCARB1
1.03651e-50	1.28608	0.554	0.279	3.47623e-46	Endo_capillaries	PDXK
5.18675e-50	1.27681	0.285	0.043	1.73953e-45	Endo_capillaries	PHLDB2
6.75814e-52	1.2653	0.641	0.397	2.26655e-47	Endo_capillaries	SMG1
1.36016e-40	1.25936	0.454	0.204	4.56172e-36	Endo_capillaries	APOLD1
3.73958e-36	1.25052	0.278	0.073	1.25418e-31	Endo_capillaries	CAVIN2
4.68792e-34	1.24223	0.307	0.1	1.57223e-29	Endo_capillaries	SLC16A1
4.08871e-55	1.21547	0.699	0.437	1.37127e-50	Endo_capillaries	EBF1
1.34013e-58	1.19556	0.757	0.496	4.49453e-54	Endo_capillaries	GPCPD1
3.3061e-39	1.18958	0.278	0.067	1.1088e-34	Endo_capillaries	PROM1
8.49455e-46	1.18799	0.549	0.291	2.8489e-41	Endo_capillaries	KLHL5
6.04145e-33	1.18295	0.313	0.109	2.02618e-28	Endo_capillaries	IFI27
1.9742e-94	1.17265	0.922	0.718	6.62108e-90	Endo_capillaries	ATP10A
7.11314e-53	1.16578	0.433	0.145	2.38561e-48	Endo_capillaries	MFSD2A
7.63829e-19	1.1605	0.201	0.071	2.56173e-14	Endo_capillaries	ANGPT2
5.82815e-37	1.15056	0.335	0.117	1.95465e-32	Endo_capillaries	TMEM123
4.57502e-41	1.1458	0.493	0.234	1.53437e-36	Endo_capillaries	IGFBP7
7.04274e-50	1.1177	0.648	0.358	2.36199e-45	Endo_capillaries	A2M
1.30841e-39	1.11662	0.347	0.114	4.38816e-35	Endo_capillaries	LRP8
3.33261e-36	1.11523	0.315	0.099	1.11769e-31	Endo_capillaries	SLC38A5
1.39829e-45	1.10318	0.571	0.292	4.68958e-41	Endo_capillaries	ITGA1
5.93652e-43	1.08815	0.347	0.101	1.99099e-38	Endo_capillaries	CD34
1.45265e-27	1.08692	0.378	0.18	4.87191e-23	Endo_capillaries	NET1
8.39866e-35	1.08691	0.171	0.013	2.81674e-30	Endo_capillaries	ACTN2
1.14882e-42	1.08684	0.575	0.317	3.85292e-38	Endo_capillaries	INPP5D
7.61721e-31	1.0841	0.395	0.181	2.55466e-26	Endo_capillaries	CYYR1
8.88828e-35	1.08165	0.439	0.21	2.98095e-30	Endo_capillaries	LARGE1
2.64774e-46	1.07067	0.669	0.399	8.88e-42	Endo_capillaries	SLC7A1
4.63613e-27	1.05798	0.293	0.114	1.55487e-22	Endo_capillaries	RCSD1
3.50762e-31	1.05434	0.445	0.235	1.17638e-26	Endo_capillaries	AP3S1
4.64895e-31	1.05122	0.261	0.075	1.55917e-26	Endo_capillaries	RGCC
4.55772e-20	1.04627	0.238	0.095	1.52857e-15	Endo_capillaries	RBM20
4.0906e-39	1.04522	0.474	0.229	1.37191e-34	Endo_capillaries	JCAD
1.90246e-34	1.03766	0.447	0.21	6.38047e-30	Endo_capillaries	EFR3B
9.15841e-25	1.03648	0.299	0.126	3.07155e-20	Endo_capillaries	NKD1
2.06669e-32	1.0344	0.402	0.186	6.93126e-28	Endo_capillaries	TIE1
2.86461e-35	1.02363	0.479	0.247	9.60733e-31	Endo_capillaries	TFRC
3.93496e-31	1.01724	0.442	0.226	1.31971e-26	Endo_capillaries	PPM1H
2.64391e-27	1.01631	0.312	0.125	8.86714e-23	Endo_capillaries	ITM2A
2.78519e-29	1.00204	0.347	0.146	9.34098e-25	Endo_capillaries	TDRP
2.62638e-28	0.994291	0.301	0.111	8.80834e-24	Endo_capillaries	CLIC5
3.37992e-41	0.992112	0.643	0.401	1.13356e-36	Endo_capillaries	AGAP1
1.89668e-25	0.985356	0.441	0.248	6.36108e-21	Endo_capillaries	CMTM8
1.05247e-33	0.984976	0.496	0.267	3.52979e-29	Endo_capillaries	ANKRD44
1.52563e-24	0.981051	0.221	0.068	5.11667e-20	Endo_capillaries	APCDD1
9.25486e-19	0.976968	0.271	0.125	3.1039e-14	Endo_capillaries	IFITM3
3.28137e-55	0.975479	0.842	0.575	1.10051e-50	Endo_capillaries	THSD4
3.86273e-23	0.958918	0.35	0.179	1.29548e-18	Endo_capillaries	PRTG
5.09158e-27	0.95555	0.347	0.153	1.70761e-22	Endo_capillaries	STK39
3.28118e-11	0.953632	0.22	0.116	1.10044e-06	Endo_capillaries	RGS6
1.05789e-25	0.953146	0.406	0.216	3.54795e-21	Endo_capillaries	HLF
4.37102e-20	0.950339	0.376	0.215	1.46595e-15	Endo_capillaries	SLC7A11
2.24143e-29	0.949777	0.445	0.231	7.5173e-25	Endo_capillaries	SLC12A2
1.65094e-32	0.949359	0.473	0.242	5.53693e-28	Endo_capillaries	CXorf36
1.09455e-27	0.949121	0.43	0.224	3.67091e-23	Endo_capillaries	ETS1
6.50159e-16	0.935513	0.327	0.191	2.1805e-11	Endo_capillaries	ZNF366
4.53737e-39	0.92316	0.733	0.496	1.52174e-34	Endo_capillaries	SORBS2
1.0062e-28	0.917502	0.403	0.197	3.37461e-24	Endo_capillaries	SLC39A8
4.87461e-29	0.905284	0.519	0.308	1.63485e-24	Endo_capillaries	EMCN
1.63715e-28	0.902018	0.528	0.317	5.49067e-24	Endo_capillaries	PPARD
4.31566e-31	0.9018	0.641	0.432	1.44739e-26	Endo_capillaries	ITGA6
6.61452e-24	0.899008	0.351	0.172	2.21838e-19	Endo_capillaries	NRP2
8.90927e-25	0.898105	0.484	0.291	2.98799e-20	Endo_capillaries	RUNDC3B
3.12606e-21	0.897209	0.451	0.272	1.04842e-16	Endo_capillaries	DACH1
8.01121e-24	0.89007	0.398	0.209	2.6868e-19	Endo_capillaries	PALD1
8.12999e-30	0.886925	0.522	0.303	2.72664e-25	Endo_capillaries	GALNT15
1.81982e-23	0.879844	0.312	0.138	6.10333e-19	Endo_capillaries	ID1
1.36742e-25	0.874116	0.203	0.053	4.58607e-21	Endo_capillaries	SLC22A5
6.2744e-30	0.871138	0.543	0.314	2.10431e-25	Endo_capillaries	NOSTRIN
1.95121e-27	0.870798	0.158	0.021	6.54398e-23	Endo_capillaries	LINC02043
7.6946e-25	0.867915	0.222	0.067	2.58061e-20	Endo_capillaries	AFAP1L1
5.19753e-23	0.864803	0.456	0.278	1.74315e-18	Endo_capillaries	SERPINB6
6.33409e-29	0.864177	0.36	0.157	2.12433e-24	Endo_capillaries	MGLL
1.87708e-22	0.862135	0.351	0.18	6.29536e-18	Endo_capillaries	TANK
7.4489e-27	0.859927	0.194	0.043	2.49821e-22	Endo_capillaries	TBX3
7.22595e-17	0.85931	0.202	0.082	2.42344e-12	Endo_capillaries	SPARC
2.39922e-25	0.856998	0.32	0.132	8.04651e-21	Endo_capillaries	FARP1
2.09569e-25	0.852214	0.521	0.321	7.02853e-21	Endo_capillaries	MCC
5.83203e-27	0.852125	0.233	0.068	1.95595e-22	Endo_capillaries	NPIPB4
1.29483e-24	0.851015	0.21	0.06	4.34262e-20	Endo_capillaries	SLC9A3R2
8.66816e-23	0.843863	0.229	0.08	2.90713e-18	Endo_capillaries	SLC30A1
1.93847e-33	0.82964	0.619	0.38	6.50123e-29	Endo_capillaries	SLCO2B1
6.57094e-21	0.826458	0.49	0.319	2.20376e-16	Endo_capillaries	CDYL2
5.71428e-23	0.82228	0.19	0.051	1.91645e-18	Endo_capillaries	PRKCB
4.31261e-16	0.812195	0.293	0.159	1.44636e-11	Endo_capillaries	LHFPL2
1.28143e-07	0.811988	0.408	0.322	0.00429767	Endo_capillaries	RIMKLB
8.21426e-25	0.809507	0.568	0.364	2.7549e-20	Endo_capillaries	SORT1
2.57719e-21	0.809369	0.185	0.053	8.64339e-17	Endo_capillaries	SOX18
2.15528e-15	0.80896	0.14	0.042	7.22837e-11	Endo_capillaries	HES1
3.14161e-19	0.80222	0.27	0.125	1.05363e-14	Endo_capillaries	KIAA1549
4.24716e-26	0.799807	0.231	0.069	1.42441e-21	Endo_capillaries	VSIR
1.32027e-28	0.797184	0.684	0.491	4.42791e-24	Endo_capillaries	ANKS1A
2.12965e-16	0.794205	0.247	0.116	7.14241e-12	Endo_capillaries	PLPPR4
6.5347e-26	0.794027	0.144	0.017	2.19161e-21	Endo_capillaries	KDR
2.57541e-14	0.793305	0.284	0.162	8.63742e-10	Endo_capillaries	CHKA
1.55387e-20	0.782256	0.159	0.038	5.21138e-16	Endo_capillaries	CASS4
1.22782e-21	0.775674	0.175	0.044	4.11787e-17	Endo_capillaries	DENND2A
1.79581e-20	0.775058	0.298	0.141	6.02278e-16	Endo_capillaries	AHNAK
3.76135e-18	0.774634	0.17	0.052	1.26148e-13	Endo_capillaries	MT1E
1.06979e-20	0.772789	0.441	0.273	3.58786e-16	Endo_capillaries	TPM1
8.64308e-29	0.766706	0.704	0.506	2.89872e-24	Endo_capillaries	LEF1
1.70382e-15	0.76224	0.467	0.319	5.71429e-11	Endo_capillaries	CCDC85A
8.04768e-20	0.761396	0.514	0.35	2.69903e-15	Endo_capillaries	NLK
5.81482e-24	0.761164	0.476	0.292	1.95017e-19	Endo_capillaries	EPN2
1.74894e-21	0.760665	0.196	0.06	5.86561e-17	Endo_capillaries	LY6E
1.1018e-12	0.755362	0.32	0.199	3.69522e-08	Endo_capillaries	PRKACB
1.62953e-19	0.754737	0.18	0.056	5.46512e-15	Endo_capillaries	TM4SF18
9.10118e-17	0.753697	0.17	0.058	3.05235e-12	Endo_capillaries	MLEC
7.23311e-14	0.752312	0.211	0.099	2.42584e-09	Endo_capillaries	AL136164.2
6.35089e-30	0.750167	0.703	0.482	2.12996e-25	Endo_capillaries	RASAL2
8.96871e-35	0.747509	0.747	0.512	3.00793e-30	Endo_capillaries	TBC1D4
2.19134e-36	0.745385	0.895	0.763	7.34931e-32	Endo_capillaries	FLT1
3.67272e-17	0.743789	0.412	0.261	1.23176e-12	Endo_capillaries	CCDC50
1.60799e-18	0.74149	0.173	0.054	5.39287e-14	Endo_capillaries	CD320
2.40865e-18	0.74086	0.133	0.03	8.07814e-14	Endo_capillaries	SLC5A6
4.23663e-14	0.740031	0.255	0.131	1.42088e-09	Endo_capillaries	MIR181A1HG
1.59711e-18	0.737836	0.289	0.141	5.35638e-14	Endo_capillaries	C2CD2
1.04479e-16	0.737504	0.19	0.071	3.50402e-12	Endo_capillaries	GPD1L
2.69542e-17	0.737117	0.127	0.028	9.03991e-13	Endo_capillaries	RNASE1
3.58294e-24	0.732073	0.53	0.339	1.20165e-19	Endo_capillaries	ADGRL4
3.39021e-19	0.73171	0.236	0.097	1.13701e-14	Endo_capillaries	STX3
1.45306e-14	0.725711	0.182	0.075	4.87328e-10	Endo_capillaries	RPS23
3.43698e-12	0.720763	0.378	0.252	1.15269e-07	Endo_capillaries	CDH2
4.22827e-13	0.718711	0.189	0.085	1.41808e-08	Endo_capillaries	IVNS1ABP
4.27181e-14	0.718562	0.158	0.059	1.43268e-09	Endo_capillaries	CKMT2
7.31565e-24	0.7111	0.615	0.435	2.45352e-19	Endo_capillaries	TSC22D1
5.74023e-18	0.710342	0.241	0.103	1.92516e-13	Endo_capillaries	AIF1L
1.52794e-13	0.710225	0.163	0.064	5.12442e-09	Endo_capillaries	RPS27A
2.96287e-41	0.710183	0.884	0.75	9.93686e-37	Endo_capillaries	HERC2
3.67055e-18	0.709631	0.461	0.295	1.23103e-13	Endo_capillaries	NRP1
3.04014e-15	0.708854	0.364	0.219	1.0196e-10	Endo_capillaries	HLA-B
1.34381e-14	0.708254	0.178	0.069	4.50686e-10	Endo_capillaries	DGKI
6.60304e-16	0.705055	0.363	0.217	2.21453e-11	Endo_capillaries	ANKH
5.26841e-16	0.701161	0.25	0.117	1.76692e-11	Endo_capillaries	SHLD1
2.30507e-13	0.700128	0.388	0.256	7.73075e-09	Endo_capillaries	ADK
6.07896e-14	0.700071	0.126	0.037	2.03876e-09	Endo_capillaries	NID1
5.07717e-09	0.698348	0.229	0.138	0.000170278	Endo_capillaries	GALNT17
4.00033e-14	0.693244	0.339	0.209	1.34163e-09	Endo_capillaries	MFHAS1
3.86147e-13	0.687953	0.172	0.072	1.29506e-08	Endo_capillaries	PGR
1.81612e-19	0.685202	0.394	0.223	6.09091e-15	Endo_capillaries	BCL2L1
2.19705e-15	0.684928	0.526	0.384	7.36847e-11	Endo_capillaries	ACVR1
1.31801e-15	0.681534	0.522	0.383	4.42034e-11	Endo_capillaries	SMARCA2
5.50011e-11	0.679488	0.186	0.091	1.84463e-06	Endo_capillaries	FTL
6.70784e-16	0.676146	0.23	0.102	2.24968e-11	Endo_capillaries	SLC16A14
3.09309e-14	0.674265	0.378	0.24	1.03736e-09	Endo_capillaries	ZSWIM5
1.63753e-19	0.674257	0.625	0.449	5.49196e-15	Endo_capillaries	ST8SIA6
3.21019e-14	0.673028	0.206	0.093	1.07663e-09	Endo_capillaries	DENND2C
3.674e-16	0.6707	0.347	0.204	1.23219e-11	Endo_capillaries	SH3BP4
5.87353e-25	0.670012	0.744	0.562	1.96986e-20	Endo_capillaries	GALNT18
3.30755e-17	0.668923	0.139	0.035	1.10928e-12	Endo_capillaries	GNG11
4.09303e-12	0.665911	0.229	0.123	1.37272e-07	Endo_capillaries	SLFN12L
1.22123e-16	0.665714	0.428	0.269	4.09578e-12	Endo_capillaries	SGPP2
3.23424e-11	0.664618	0.179	0.085	1.0847e-06	Endo_capillaries	FRMD3
2.06287e-14	0.663558	0.352	0.21	6.91844e-10	Endo_capillaries	PRKD1
1.38619e-29	0.66215	0.79	0.612	4.64902e-25	Endo_capillaries	ESYT2
1.8908e-13	0.662089	0.146	0.052	6.34136e-09	Endo_capillaries	CCDC85B
2.17486e-12	0.65674	0.176	0.077	7.29404e-08	Endo_capillaries	SERF2
1.01462e-09	0.65529	0.112	0.042	3.40284e-05	Endo_capillaries	IFITM2
3.10449e-12	0.653509	0.293	0.17	1.04119e-07	Endo_capillaries	ACER2
5.38426e-19	0.652762	0.245	0.101	1.80577e-14	Endo_capillaries	PDGFB
1.4022e-16	0.650739	0.45	0.297	4.70268e-12	Endo_capillaries	FMNL3
8.96027e-14	0.650697	0.147	0.052	3.00509e-09	Endo_capillaries	SRARP
1.42751e-15	0.646722	0.285	0.154	4.78758e-11	Endo_capillaries	CASP10
1.68517e-16	0.646005	0.253	0.119	5.65171e-12	Endo_capillaries	ROBO4
1.58407e-16	0.644914	0.449	0.299	5.31265e-12	Endo_capillaries	EML1
4.04357e-17	0.643845	0.185	0.065	1.35613e-12	Endo_capillaries	BST2
8.28787e-11	0.643447	0.178	0.088	2.77958e-06	Endo_capillaries	GBP4
5.78454e-12	0.641781	0.351	0.234	1.94002e-07	Endo_capillaries	ELP4
2.25362e-10	0.63856	0.262	0.158	7.55819e-06	Endo_capillaries	HLA-A
3.86116e-15	0.637811	0.355	0.219	1.29496e-10	Endo_capillaries	NFATC3
2.75546e-13	0.634779	0.151	0.057	9.24126e-09	Endo_capillaries	PRX
4.16212e-15	0.634494	0.393	0.249	1.39589e-10	Endo_capillaries	MTSS1
2.73857e-14	0.629674	0.139	0.044	9.1846e-10	Endo_capillaries	RAMP2
5.01159e-15	0.625881	0.182	0.07	1.68079e-10	Endo_capillaries	AP1S2
8.18007e-13	0.622292	0.201	0.093	2.74343e-08	Endo_capillaries	EXPH5
2.85438e-16	0.620436	0.257	0.121	9.57301e-12	Endo_capillaries	KIAA1324L
2.09589e-14	0.620396	0.218	0.099	7.02918e-10	Endo_capillaries	HLA-C
1.95772e-09	0.618861	0.216	0.123	6.5658e-05	Endo_capillaries	FRAS1
3.33207e-11	0.618613	0.3	0.182	1.11751e-06	Endo_capillaries	ZNF704
3.10492e-30	0.618432	0.828	0.696	1.04133e-25	Endo_capillaries	SPTBN1
4.57877e-12	0.618157	0.257	0.143	1.53563e-07	Endo_capillaries	ACSL5
7.00213e-12	0.61704	0.295	0.181	2.34837e-07	Endo_capillaries	SH2D3C
8.76397e-17	0.615286	0.619	0.473	2.93926e-12	Endo_capillaries	BBS9
1.45588e-07	0.614482	0.176	0.101	0.00488274	Endo_capillaries	AC233296.1
4.79225e-11	0.612788	0.516	0.396	1.60723e-06	Endo_capillaries	INSR
5.47945e-31	0.609784	0.892	0.721	1.8377e-26	Endo_capillaries	ABCB1
4.83122e-13	0.608324	0.406	0.275	1.62029e-08	Endo_capillaries	DCLK2
1.70679e-08	0.60697	0.294	0.2	0.000572423	Endo_capillaries	LAMA4
1.04164e-10	0.603858	0.22	0.12	3.49346e-06	Endo_capillaries	HERC6
2.1866e-19	0.603816	0.588	0.416	7.33343e-15	Endo_capillaries	SNED1
4.82096e-17	0.60371	0.632	0.513	1.61686e-12	Endo_capillaries	PAM
6.4214e-20	0.603128	0.332	0.165	2.15361e-15	Endo_capillaries	CALM1
2.06033e-15	0.602546	0.175	0.065	6.90995e-11	Endo_capillaries	GIMAP7
1.88378e-12	0.602307	0.363	0.239	6.31783e-08	Endo_capillaries	CDC14A
2.65462e-17	0.601439	0.116	0.022	8.90308e-13	Endo_capillaries	MRPS6
2.91255e-09	0.600556	0.187	0.101	9.76811e-05	Endo_capillaries	LINC01376
7.19639e-09	0.596747	0.117	0.049	0.000241353	Endo_capillaries	MT1M
1.77927e-14	0.595719	0.541	0.412	5.96732e-10	Endo_capillaries	UACA
1.43819e-10	0.594511	0.186	0.092	4.82342e-06	Endo_capillaries	LSS
1.33934e-09	0.593904	0.184	0.098	4.49188e-05	Endo_capillaries	MGAT1
8.88634e-15	0.592873	0.197	0.08	2.9803e-10	Endo_capillaries	RPL28
5.88631e-08	0.592791	0.28	0.188	0.00197415	Endo_capillaries	NT5DC1
4.2371e-11	0.591937	0.292	0.184	1.42104e-06	Endo_capillaries	KANSL1L
1.6712e-10	0.591123	0.211	0.11	5.60486e-06	Endo_capillaries	AC002070.1
2.21012e-09	0.590973	0.221	0.128	7.4123e-05	Endo_capillaries	RUSC2
7.60853e-12	0.590756	0.448	0.333	2.55175e-07	Endo_capillaries	WDR60
1.00436e-14	0.589106	0.115	0.027	3.36844e-10	Endo_capillaries	COL4A4
4.34827e-19	0.588492	0.118	0.019	1.45832e-14	Endo_capillaries	SLC38A3
3.79868e-10	0.588083	0.179	0.09	1.274e-05	Endo_capillaries	SLC16A2
3.26103e-13	0.587803	0.454	0.316	1.09369e-08	Endo_capillaries	ATP9A
2.88709e-14	0.583692	0.147	0.05	9.68272e-10	Endo_capillaries	IFI6
2.19833e-11	0.583432	0.127	0.047	7.37276e-07	Endo_capillaries	COL26A1
1.934e-09	0.581494	0.139	0.063	6.48624e-05	Endo_capillaries	RPL18
2.00378e-12	0.580513	0.262	0.149	6.72028e-08	Endo_capillaries	AC007388.1
2.8237e-13	0.5803	0.531	0.398	9.47012e-09	Endo_capillaries	MEF2C
3.17621e-15	0.579999	0.512	0.374	1.06524e-10	Endo_capillaries	ADAM10
3.56999e-10	0.577986	0.179	0.087	1.1973e-05	Endo_capillaries	EDN1
9.64916e-12	0.576847	0.169	0.075	3.23614e-07	Endo_capillaries	MYL6
7.84316e-09	0.576706	0.126	0.056	0.000263044	Endo_capillaries	MT1X
1.66914e-11	0.574761	0.109	0.034	5.59795e-07	Endo_capillaries	ADIRF
1.7389e-13	0.573528	0.428	0.291	5.83192e-09	Endo_capillaries	DNM2
2.81272e-11	0.566924	0.273	0.16	9.43331e-07	Endo_capillaries	CDC14B
7.74455e-15	0.566713	0.47	0.324	2.59737e-10	Endo_capillaries	RNF19A
7.19009e-11	0.563298	0.12	0.044	2.41141e-06	Endo_capillaries	SLC9A2
1.07526e-12	0.562443	0.104	0.027	3.6062e-08	Endo_capillaries	TMEM51
1.33857e-13	0.559686	0.119	0.032	4.48929e-09	Endo_capillaries	CXCL12
1.26439e-10	0.5592	0.233	0.13	4.24051e-06	Endo_capillaries	RPL13
7.67167e-08	0.557835	0.27	0.179	0.00257293	Endo_capillaries	ID3
1.37596e-08	0.557472	0.171	0.093	0.000461469	Endo_capillaries	AL121761.1
2.81043e-12	0.554713	0.435	0.31	9.42562e-08	Endo_capillaries	PPP3CC
4.56092e-10	0.553879	0.292	0.184	1.52964e-05	Endo_capillaries	ITPKB
8.37059e-09	0.552626	0.203	0.115	0.000280733	Endo_capillaries	MGST2
3.28709e-14	0.551533	0.144	0.048	1.10242e-09	Endo_capillaries	RPL8
1.50049e-10	0.544777	0.318	0.201	5.03234e-06	Endo_capillaries	SLC19A3
5.70162e-11	0.54427	0.289	0.175	1.91221e-06	Endo_capillaries	SPRED2
6.05407e-14	0.543614	0.126	0.037	2.03041e-09	Endo_capillaries	SMIM3
6.19456e-09	0.540836	0.116	0.049	0.000207753	Endo_capillaries	NEK5
2.39967e-10	0.540277	0.15	0.067	8.04802e-06	Endo_capillaries	SLC3A2
4.50574e-09	0.538601	0.447	0.339	0.000151114	Endo_capillaries	PRKCE
1.88331e-09	0.538452	0.128	0.055	6.31624e-05	Endo_capillaries	GNG4
3.30322e-17	0.538221	0.812	0.728	1.10783e-12	Endo_capillaries	COBLL1
6.69606e-12	0.536867	0.182	0.082	2.24572e-07	Endo_capillaries	RPLP1
9.31275e-13	0.536577	0.327	0.196	3.12331e-08	Endo_capillaries	MTRNR2L12
2.00536e-10	0.535267	0.348	0.235	6.72559e-06	Endo_capillaries	LCORL
6.11976e-13	0.535263	0.116	0.034	2.05244e-08	Endo_capillaries	OAS2
3.68695e-09	0.534107	0.213	0.121	0.000123653	Endo_capillaries	DEPTOR
3.55142e-19	0.534028	0.745	0.581	1.19108e-14	Endo_capillaries	FLI1
4.09454e-07	0.533754	0.211	0.135	0.0137323	Endo_capillaries	MRPL1
1.89703e-10	0.532691	0.145	0.062	6.36224e-06	Endo_capillaries	RPS19
1.01196e-13	0.53138	0.512	0.351	3.39392e-09	Endo_capillaries	SLC1A1
4.59676e-12	0.530598	0.559	0.44	1.54166e-07	Endo_capillaries	XAF1
1.94213e-11	0.529275	0.179	0.084	6.5135e-07	Endo_capillaries	GGT5
1.2007e-11	0.528189	0.373	0.252	4.02691e-07	Endo_capillaries	SRGAP2B
3.22701e-13	0.528092	0.178	0.076	1.08227e-08	Endo_capillaries	HSPA12B
5.7807e-11	0.525928	0.21	0.108	1.93873e-06	Endo_capillaries	ST8SIA4
2.54392e-17	0.525628	0.478	0.31	8.5318e-13	Endo_capillaries	EGFL7
1.20543e-07	0.523072	0.149	0.078	0.00404277	Endo_capillaries	DYSF
1.31918e-10	0.521596	0.185	0.089	4.42426e-06	Endo_capillaries	PLCL2
1.33683e-07	0.520274	0.328	0.24	0.00448345	Endo_capillaries	PIAS2
1.31425e-10	0.517336	0.459	0.333	4.40772e-06	Endo_capillaries	KLF12
2.24343e-10	0.517111	0.569	0.462	7.52401e-06	Endo_capillaries	PREX2
4.70151e-15	0.516754	0.319	0.17	1.57679e-10	Endo_capillaries	PRKCA
9.29289e-12	0.516749	0.108	0.032	3.11665e-07	Endo_capillaries	FSCN1
1.32953e-13	0.515556	0.115	0.031	4.45899e-09	Endo_capillaries	EDN3
1.31481e-15	0.514743	0.558	0.398	4.4096e-11	Endo_capillaries	SLCO3A1
8.92461e-11	0.513331	0.586	0.467	2.99313e-06	Endo_capillaries	NR3C2
1.62334e-09	0.506738	0.331	0.222	5.44435e-05	Endo_capillaries	TBC1D12
5.97626e-07	0.504708	0.432	0.345	0.0200432	Endo_capillaries	EGFR
1.61598e-10	0.503275	0.114	0.039	5.41967e-06	Endo_capillaries	CTGF
9.06215e-09	0.502947	0.337	0.234	0.000303926	Endo_capillaries	RHOBTB1
5.13225e-09	0.502806	0.11	0.043	0.000172126	Endo_capillaries	ZNF362
6.55104e-11	0.502233	0.195	0.097	2.19709e-06	Endo_capillaries	CD109
5.13266e-09	0.496905	0.258	0.165	0.000172139	Endo_capillaries	PTAR1
4.06884e-08	0.496824	0.223	0.133	0.00136461	Endo_capillaries	DCLK1
1.01411e-14	0.495777	0.548	0.389	3.40113e-10	Endo_capillaries	SRGAP2
1.72702e-11	0.493677	0.356	0.229	5.79209e-07	Endo_capillaries	KDM7A
4.58512e-07	0.493628	0.24	0.159	0.0153776	Endo_capillaries	ATP7B
3.34687e-08	0.493155	0.179	0.099	0.00112247	Endo_capillaries	PHLDB1
1.13522e-06	0.489719	0.308	0.225	0.038073	Endo_capillaries	BACH1
2.27541e-12	0.489354	0.581	0.457	7.63127e-08	Endo_capillaries	SPARCL1
3.03834e-18	0.487636	0.695	0.518	1.019e-13	Endo_capillaries	DNM3
2.24131e-09	0.486468	0.144	0.067	7.51692e-05	Endo_capillaries	ACVRL1
5.62525e-12	0.486407	0.557	0.428	1.8866e-07	Endo_capillaries	CEMIP2
3.12502e-08	0.485768	0.37	0.269	0.00104807	Endo_capillaries	ST3GAL6
5.45398e-11	0.485239	0.348	0.231	1.82916e-06	Endo_capillaries	ZKSCAN1
7.40371e-08	0.482882	0.295	0.204	0.00248306	Endo_capillaries	STXBP5
1.19961e-06	0.480996	0.116	0.059	0.0402325	Endo_capillaries	TRPC6
2.37002e-09	0.48086	0.418	0.31	7.94857e-05	Endo_capillaries	DGKH
8.88797e-09	0.480555	0.527	0.435	0.000298085	Endo_capillaries	CEP112
3.60061e-07	0.480155	0.316	0.23	0.0120757	Endo_capillaries	MAP3K1
3.2342e-09	0.477994	0.209	0.117	0.000108469	Endo_capillaries	KLF3
1.17916e-06	0.47769	0.144	0.08	0.0395466	Endo_capillaries	PTPRN2
1.70684e-08	0.475276	0.437	0.34	0.000572439	Endo_capillaries	MBNL2
8.13016e-11	0.474763	0.31	0.199	2.72669e-06	Endo_capillaries	SRGAP2C
1.17595e-11	0.472884	0.601	0.464	3.9439e-07	Endo_capillaries	HEG1
8.72958e-13	0.472738	0.212	0.1	2.92773e-08	Endo_capillaries	ESAM
2.81418e-10	0.472302	0.143	0.062	9.43821e-06	Endo_capillaries	NES
1.19981e-12	0.471631	0.106	0.028	4.02391e-08	Endo_capillaries	S100A10
3.69209e-07	0.471544	0.206	0.128	0.0123825	Endo_capillaries	CHD7
3.69752e-10	0.466092	0.128	0.051	1.24008e-05	Endo_capillaries	MTRNR2L8
3.21296e-09	0.463597	0.158	0.077	0.000107756	Endo_capillaries	RPL11
1.2544e-12	0.46075	0.224	0.11	4.207e-08	Endo_capillaries	MAP4K2
1.3422e-09	0.459942	0.229	0.132	4.50147e-05	Endo_capillaries	SLC16A1-AS1
8.70609e-07	0.459757	0.143	0.079	0.0291985	Endo_capillaries	RPL10
1.66156e-09	0.457974	0.441	0.328	5.57253e-05	Endo_capillaries	MYO6
1.30999e-07	0.457443	0.445	0.349	0.00439344	Endo_capillaries	MAML2
2.97228e-07	0.455721	0.398	0.305	0.00996844	Endo_capillaries	FRY
1.90924e-07	0.45565	0.292	0.203	0.00640321	Endo_capillaries	ZNRF3
2.87171e-07	0.454678	0.175	0.103	0.00963115	Endo_capillaries	CHST12
3.63128e-09	0.453679	0.33	0.223	0.000121786	Endo_capillaries	PREX1
1.53227e-07	0.45348	0.159	0.086	0.00513893	Endo_capillaries	SLC2A13
1.31653e-07	0.453353	0.17	0.095	0.00441537	Endo_capillaries	BTBD3
9.2492e-07	0.452854	0.344	0.258	0.03102	Endo_capillaries	AVL9
6.09699e-07	0.452112	0.231	0.152	0.0204481	Endo_capillaries	CCDC186
1.64336e-08	0.451219	0.104	0.041	0.000551149	Endo_capillaries	ABHD17A
1.37654e-06	0.448299	0.159	0.091	0.0461664	Endo_capillaries	LINC01515
5.39002e-11	0.447964	0.585	0.469	1.8077e-06	Endo_capillaries	ARHGAP31
3.0306e-10	0.4467	0.555	0.449	1.0164e-05	Endo_capillaries	USP6NL
7.04376e-08	0.446127	0.193	0.112	0.00236234	Endo_capillaries	EIF4G2
6.56558e-08	0.446002	0.131	0.064	0.00220197	Endo_capillaries	SMYD2
9.58351e-09	0.444495	0.499	0.398	0.000321412	Endo_capillaries	MAP4K3
6.34362e-08	0.443569	0.658	0.579	0.00212752	Endo_capillaries	APP
3.25284e-12	0.442537	0.574	0.426	1.09094e-07	Endo_capillaries	STXBP6
1.68108e-08	0.441398	0.126	0.057	0.000563799	Endo_capillaries	SMCO4
6.90849e-08	0.44112	0.347	0.251	0.00231697	Endo_capillaries	ARFIP1
8.3297e-07	0.440495	0.142	0.077	0.0279361	Endo_capillaries	TAGLN2
1.92484e-07	0.440131	0.283	0.191	0.00645554	Endo_capillaries	SDCBP
2.19835e-09	0.439605	0.194	0.102	7.37282e-05	Endo_capillaries	CAPN2
1.87159e-07	0.437128	0.372	0.281	0.00627693	Endo_capillaries	TMCC3
8.41977e-17	0.436726	0.716	0.554	2.82382e-12	Endo_capillaries	NEBL
6.18979e-08	0.436527	0.343	0.248	0.00207593	Endo_capillaries	MIRLET7BHG
4.61837e-07	0.436335	0.394	0.298	0.0154891	Endo_capillaries	C22orf34
2.53333e-07	0.434689	0.462	0.377	0.00849627	Endo_capillaries	STARD13
7.10125e-10	0.434677	0.371	0.252	2.38162e-05	Endo_capillaries	ZFHX3
1.2017e-12	0.433791	0.163	0.065	4.03027e-08	Endo_capillaries	TMEM204
4.2426e-09	0.431685	0.165	0.084	0.000142288	Endo_capillaries	CAVIN1
3.84015e-07	0.431327	0.105	0.048	0.0128791	Endo_capillaries	RPL19
3.67048e-07	0.429098	0.128	0.064	0.0123101	Endo_capillaries	RPS15
8.58852e-10	0.428218	0.161	0.075	2.88042e-05	Endo_capillaries	GCNT1
4.07499e-07	0.427598	0.186	0.111	0.0136667	Endo_capillaries	XXYLT1
8.99933e-07	0.42759	0.316	0.235	0.0301819	Endo_capillaries	IFI44
3.13001e-10	0.426443	0.25	0.144	1.04974e-05	Endo_capillaries	ACTG1
8.02367e-09	0.425493	0.225	0.132	0.000269098	Endo_capillaries	NEK3
5.43787e-07	0.425356	0.174	0.101	0.0182375	Endo_capillaries	TMBIM6
2.19494e-08	0.424837	0.302	0.201	0.00073614	Endo_capillaries	STXBP1
1.04736e-06	0.42468	0.276	0.192	0.0351263	Endo_capillaries	SHROOM2
4.16112e-09	0.423255	0.284	0.185	0.000139556	Endo_capillaries	KANK3
2.99032e-08	0.423108	0.541	0.444	0.00100289	Endo_capillaries	GSK3B
6.69527e-07	0.422005	0.108	0.052	0.0224546	Endo_capillaries	OAS3
6.7977e-15	0.419276	0.786	0.668	2.27981e-10	Endo_capillaries	QKI
2.43933e-10	0.415997	0.116	0.042	8.18104e-06	Endo_capillaries	SLC52A3
2.28908e-14	0.41584	0.821	0.738	7.67712e-10	Endo_capillaries	IGF1R
6.13004e-07	0.415706	0.295	0.206	0.0205589	Endo_capillaries	RELL1
6.17926e-07	0.415499	0.508	0.425	0.020724	Endo_capillaries	ARFGEF2
8.30003e-07	0.415385	0.278	0.192	0.0278367	Endo_capillaries	VOPP1
1.35085e-09	0.414939	0.545	0.429	4.53049e-05	Endo_capillaries	UNC13B
1.45811e-06	0.410295	0.259	0.179	0.048902	Endo_capillaries	NIN
5.37126e-07	0.410213	0.161	0.092	0.0180141	Endo_capillaries	AC011997.1
5.59737e-07	0.410078	0.29	0.205	0.0187725	Endo_capillaries	RBM17
8.24995e-11	0.408315	0.155	0.067	2.76687e-06	Endo_capillaries	MYL12B
2.62744e-09	0.405868	0.156	0.075	8.8119e-05	Endo_capillaries	RPS28
1.45405e-06	0.403834	0.29	0.205	0.048766	Endo_capillaries	FNBP1L
1.03392e-10	0.403641	0.609	0.502	3.46755e-06	Endo_capillaries	LMBR1
8.84882e-09	0.402917	0.129	0.057	0.000296772	Endo_capillaries	RPS14
4.15658e-07	0.402838	0.215	0.135	0.0139403	Endo_capillaries	BICRAL
5.0468e-09	0.400917	0.104	0.038	0.00016926	Endo_capillaries	RHOC
3.48894e-08	0.400683	0.237	0.149	0.00117012	Endo_capillaries	SHC2
1.85453e-07	0.398707	0.421	0.328	0.00621973	Endo_capillaries	EPC1
4.94535e-07	0.398175	0.163	0.092	0.0165857	Endo_capillaries	THSD1
2.12802e-08	0.397892	0.208	0.121	0.000713694	Endo_capillaries	MPZL1
2.88507e-10	0.396197	0.344	0.222	9.67595e-06	Endo_capillaries	NOTCH4
5.74972e-09	0.395879	0.137	0.062	0.000192834	Endo_capillaries	KLF13
3.20859e-07	0.39576	0.184	0.108	0.010761	Endo_capillaries	CCM2L
2.98368e-07	0.395617	0.351	0.256	0.0100067	Endo_capillaries	ACSL3
1.60902e-07	0.394685	0.249	0.162	0.00539634	Endo_capillaries	CDH5
8.69273e-07	0.393915	0.163	0.094	0.0291537	Endo_capillaries	MYCT1
2.03951e-08	0.393359	0.121	0.054	0.000684011	Endo_capillaries	NPIPB13
4.99284e-07	0.384843	0.115	0.055	0.016745	Endo_capillaries	FAU
2.4974e-07	0.382008	0.216	0.134	0.00837577	Endo_capillaries	ECHDC2
6.08283e-07	0.381751	0.265	0.18	0.0204006	Endo_capillaries	STAT1
2.67525e-09	0.381687	0.138	0.061	8.97225e-05	Endo_capillaries	RSAD2
9.14604e-07	0.381547	0.23	0.152	0.030674	Endo_capillaries	TMEM44
3.401e-07	0.380695	0.505	0.413	0.0114063	Endo_capillaries	HERC4
8.68239e-08	0.377095	0.669	0.587	0.0029119	Endo_capillaries	ADIPOR2
1.38696e-06	0.375374	0.22	0.144	0.0465158	Endo_capillaries	PPP4R2
1.49072e-06	0.375348	0.182	0.111	0.0499958	Endo_capillaries	TMPO
3.49508e-07	0.374058	0.246	0.162	0.0117218	Endo_capillaries	RHOJ
6.89825e-10	0.373458	0.1	0.033	2.31353e-05	Endo_capillaries	CSRP2
3.64996e-09	0.373205	0.156	0.075	0.000122412	Endo_capillaries	ITGB5
2.38043e-07	0.372086	0.437	0.336	0.00798349	Endo_capillaries	RB1
1.15548e-07	0.371353	0.234	0.147	0.00387525	Endo_capillaries	RASIP1
6.27272e-09	0.369875	0.222	0.129	0.000210374	Endo_capillaries	NDST1
2.22955e-07	0.368339	0.311	0.215	0.00747748	Endo_capillaries	TPST2
2.82872e-08	0.36743	0.11	0.046	0.000948697	Endo_capillaries	RPL36
7.51973e-08	0.367298	0.118	0.054	0.00252197	Endo_capillaries	GBA2
7.59215e-07	0.366315	0.145	0.08	0.0254626	Endo_capillaries	AMFR
2.34397e-08	0.36556	0.47	0.368	0.000786121	Endo_capillaries	GAB1
3.20161e-09	0.364719	0.127	0.055	0.000107376	Endo_capillaries	ST6GALNAC1
1.15293e-07	0.362986	0.134	0.067	0.00386669	Endo_capillaries	SGPL1
4.95667e-07	0.362658	0.671	0.576	0.0166237	Endo_capillaries	FOXN3
5.66624e-12	0.354749	0.693	0.567	1.90034e-07	Endo_capillaries	SEC14L1
1.31968e-06	0.353912	0.149	0.083	0.0442594	Endo_capillaries	PKN1
1.14994e-07	0.352303	0.261	0.17	0.00385666	Endo_capillaries	PLEKHA1
4.37571e-07	0.349776	0.224	0.143	0.0146752	Endo_capillaries	GRAPL
2.84176e-07	0.349771	0.452	0.352	0.00953069	Endo_capillaries	LIMS2
5.90811e-11	0.34714	0.571	0.435	1.98146e-06	Endo_capillaries	PODXL
6.99074e-11	0.346439	0.629	0.465	2.34455e-06	Endo_capillaries	LDLRAD3
3.97568e-09	0.344867	0.717	0.619	0.000133336	Endo_capillaries	NCOA1
3.11297e-08	0.342825	0.134	0.063	0.00104403	Endo_capillaries	S1PR1
1.35522e-09	0.342386	0.549	0.429	4.54515e-05	Endo_capillaries	HLA-E
5.91973e-09	0.339256	0.743	0.664	0.000198536	Endo_capillaries	CCNY
2.86921e-08	0.337998	0.104	0.041	0.000962275	Endo_capillaries	SMTN
2.06533e-09	0.321831	0.481	0.35	6.92672e-05	Endo_capillaries	TGFBR2
3.4566e-07	0.321372	0.121	0.058	0.0115928	Endo_capillaries	RPS12
1.73878e-08	0.320602	0.134	0.061	0.000583153	Endo_capillaries	ATOH8
7.35512e-07	0.320041	0.106	0.049	0.0246676	Endo_capillaries	ATP5F1E
6.46404e-07	0.315243	0.663	0.594	0.0216791	Endo_capillaries	RBFOX2
1.20103e-06	0.315053	0.501	0.418	0.0402802	Endo_capillaries	ZFPM2
7.62301e-11	0.301971	0.75	0.618	2.55661e-06	Endo_capillaries	SORBS1
4.38478e-08	0.301416	0.104	0.042	0.00147057	Endo_capillaries	CTDSP1
2.74034e-08	0.299802	0.548	0.438	0.000919055	Endo_capillaries	NR3C1
1.19336e-07	0.298627	0.543	0.435	0.0040023	Endo_capillaries	CCSER2
1.65792e-07	0.295148	0.645	0.521	0.00556034	Endo_capillaries	PRICKLE2
6.78872e-07	0.293077	0.257	0.17	0.022768	Endo_capillaries	CYTH3
7.25055e-08	0.287779	0.4	0.29	0.00243169	Endo_capillaries	SHROOM4
4.57517e-09	0.254722	0.776	0.691	0.000153442	Endo_capillaries	PTPRB

## Sheet: Endo_arteries
p_val	avg_log2FC	pct.1	pct.2	p_val_adj	cluster	gene
2.94017e-48	3.29596	0.657	0.448	9.86074e-44	Endo_arteries	PLPP1
2.55836e-130	3.14238	0.487	0.057	8.58023e-126	Endo_arteries	PCSK5
4.13678e-104	3.07845	0.289	0.009	1.38739e-99	Endo_arteries	DKK2
1.14813e-113	3.0404	0.587	0.136	3.8506e-109	Endo_arteries	NKAIN2
8.77251e-131	3.03709	0.904	0.702	2.94212e-126	Endo_arteries	ARL15
6.93401e-127	2.87747	0.445	0.041	2.32553e-122	Endo_arteries	ROR1
2.44754e-69	2.86902	0.668	0.356	8.20855e-65	Endo_arteries	PELI1
4.46639e-87	2.79254	0.253	0.01	1.49794e-82	Endo_arteries	SLC45A4
9.63809e-71	2.6279	0.377	0.074	3.23242e-66	Endo_arteries	GAREM1
1.96207e-93	2.59067	0.438	0.072	6.58039e-89	Endo_arteries	ADAMTS1
3.9757e-83	2.47063	0.606	0.215	1.33337e-78	Endo_arteries	AC019197.1
2.0797e-22	2.23792	0.323	0.148	6.9749e-18	Endo_arteries	HSPA5
1.14268e-40	2.21106	0.251	0.055	3.83231e-36	Endo_arteries	IRAK2
6.34909e-67	2.18383	0.538	0.192	2.12936e-62	Endo_arteries	SETBP1
1.80299e-121	2.18171	0.321	0.007	6.04686e-117	Endo_arteries	FBLN5
6.58653e-62	2.14458	0.445	0.132	2.20899e-57	Endo_arteries	VEGFC
1.77489e-58	2.13311	0.4	0.106	5.95264e-54	Endo_arteries	DUSP5
6.23067e-73	2.13138	0.334	0.048	2.08964e-68	Endo_arteries	COL8A1
1.36589e-64	2.09742	0.236	0.02	4.58093e-60	Endo_arteries	SLC7A2
1.60775e-100	2.07893	0.298	0.013	5.39207e-96	Endo_arteries	PRDM16
1.07421e-59	2.0555	0.698	0.411	3.60268e-55	Endo_arteries	MAST4
2.01696e-43	2.03028	0.328	0.094	6.76448e-39	Endo_arteries	SLC4A4
9.66557e-57	2.0213	0.504	0.192	3.24164e-52	Endo_arteries	ATP13A3
2.65916e-50	2.0144	0.468	0.178	8.91831e-46	Endo_arteries	RPS6KA5
6.46232e-60	2.0117	0.389	0.098	2.16733e-55	Endo_arteries	ELN
5.90658e-57	1.95383	0.521	0.19	1.98095e-52	Endo_arteries	TMTC1
2.44913e-52	1.92444	0.381	0.104	8.21391e-48	Endo_arteries	ARID5A
3.48313e-63	1.91189	0.17	0.003	1.16817e-58	Endo_arteries	MEDAG
3.7804e-22	1.91156	0.223	0.077	1.26787e-17	Endo_arteries	HIST1H2AC
8.8809e-47	1.89049	0.204	0.026	2.97847e-42	Endo_arteries	EFNA5
2.17281e-35	1.88443	0.219	0.047	7.28717e-31	Endo_arteries	PTGS2
7.17065e-76	1.8666	0.666	0.294	2.40489e-71	Endo_arteries	DST
1.24053e-11	1.85097	0.164	0.068	4.16049e-07	Endo_arteries	SERPINE1
6.64983e-35	1.837	0.247	0.063	2.23022e-30	Endo_arteries	CDH13
5.15863e-32	1.82153	0.44	0.213	1.7301e-27	Endo_arteries	PPP1CB
6.97268e-52	1.80321	0.198	0.018	2.3385e-47	Endo_arteries	MGP
9.92462e-35	1.78771	0.185	0.032	3.32852e-30	Endo_arteries	SERPINE2
8.7672e-52	1.7236	0.234	0.032	2.94034e-47	Endo_arteries	FGF2
2.62203e-45	1.70906	0.583	0.298	8.79376e-41	Endo_arteries	NR4A1
7.91684e-28	1.64021	0.383	0.174	2.65515e-23	Endo_arteries	HSPB1
1.20199e-40	1.6397	0.406	0.155	4.03123e-36	Endo_arteries	SYNJ2
5.29164e-59	1.63701	0.294	0.047	1.77471e-54	Endo_arteries	ITGA9
6.04251e-44	1.63241	0.46	0.182	2.02654e-39	Endo_arteries	PLXDC2
2.99348e-15	1.57489	0.37	0.223	1.00395e-10	Endo_arteries	ELL2
2.97489e-31	1.57406	0.336	0.125	9.9772e-27	Endo_arteries	BACH2
9.51461e-21	1.55849	0.14	0.032	3.19101e-16	Endo_arteries	PDE3A
1.55947e-26	1.5492	0.16	0.032	5.23014e-22	Endo_arteries	IGFBP3
3.07079e-15	1.54869	0.326	0.18	1.02988e-10	Endo_arteries	FGFR1
1.19774e-35	1.52936	0.211	0.042	4.01697e-31	Endo_arteries	MIR155HG
3.59376e-23	1.52825	0.517	0.341	1.20527e-18	Endo_arteries	EXT1
3.24139e-20	1.52421	0.191	0.061	1.0871e-15	Endo_arteries	SPOCK1
5.21425e-45	1.52235	0.213	0.03	1.74876e-40	Endo_arteries	SULF1
3.63644e-14	1.51691	0.232	0.11	1.21959e-09	Endo_arteries	DEPP1
7.30515e-26	1.50829	0.211	0.058	2.45e-21	Endo_arteries	ATF3
4.15267e-42	1.48777	0.24	0.046	1.39272e-37	Endo_arteries	CPAMD8
1.21734e-33	1.48235	0.581	0.361	4.08272e-29	Endo_arteries	AKAP13
1.23206e-32	1.48233	0.366	0.145	4.1321e-28	Endo_arteries	PTPRJ
1.07082e-15	1.45246	0.451	0.308	3.59133e-11	Endo_arteries	PTMA
5.34253e-11	1.45212	0.343	0.231	1.79178e-06	Endo_arteries	HIF1A
5.58585e-50	1.43461	0.219	0.027	1.87338e-45	Endo_arteries	MET
2.20082e-35	1.42552	0.302	0.092	7.38112e-31	Endo_arteries	SCN2A
7.53567e-30	1.41719	0.243	0.069	2.52731e-25	Endo_arteries	NOS1
1.80467e-13	1.4089	0.183	0.074	6.0525e-09	Endo_arteries	INSIG1
6.63287e-21	1.40273	0.426	0.255	2.22453e-16	Endo_arteries	SNX9
6.9763e-11	1.39435	0.347	0.23	2.33971e-06	Endo_arteries	BMP6
5.71955e-45	1.39405	0.191	0.023	1.91822e-40	Endo_arteries	LINC00840
3.04762e-14	1.3849	0.249	0.123	1.02211e-09	Endo_arteries	GLUL
1.88665e-26	1.37737	0.255	0.083	6.32746e-22	Endo_arteries	TUSC3
4.47885e-29	1.37702	0.206	0.051	1.50212e-24	Endo_arteries	PCDH11X
6.79108e-26	1.37561	0.409	0.206	2.27759e-21	Endo_arteries	EFNB2
1.27012e-07	1.36945	0.206	0.123	0.00425973	Endo_arteries	DTNA
6.95136e-22	1.3639	0.179	0.051	2.33135e-17	Endo_arteries	PGM2L1
1.98695e-19	1.36192	0.162	0.046	6.66383e-15	Endo_arteries	CD9
2.9201e-22	1.35636	0.34	0.164	9.79343e-18	Endo_arteries	NOS1AP
5.17903e-35	1.35495	0.16	0.021	1.73694e-30	Endo_arteries	PTGIS
1.71826e-28	1.34716	0.547	0.342	5.76272e-24	Endo_arteries	CTTNBP2NL
2.96387e-24	1.33519	0.426	0.225	9.94024e-20	Endo_arteries	SAMD4A
7.86546e-09	1.31133	0.296	0.197	0.000263792	Endo_arteries	ATP1A1
3.98635e-32	1.31095	0.17	0.028	1.33694e-27	Endo_arteries	CXCL2
4.48375e-31	1.3046	0.336	0.127	1.50376e-26	Endo_arteries	ITPR1
4.72045e-22	1.30015	0.177	0.048	1.58315e-17	Endo_arteries	NR4A2
5.10046e-22	1.29678	0.447	0.266	1.71059e-17	Endo_arteries	TANC2
8.41319e-25	1.28957	0.498	0.29	2.82162e-20	Endo_arteries	MCTP1
6.97537e-33	1.27932	0.172	0.029	2.3394e-28	Endo_arteries	HEY1
5.73486e-17	1.27488	0.434	0.285	1.92336e-12	Endo_arteries	SWAP70
6.22854e-47	1.25401	0.187	0.019	2.08893e-42	Endo_arteries	BMX
8.57595e-15	1.24207	0.26	0.123	2.8762e-10	Endo_arteries	EMP1
2.09243e-35	1.22875	0.221	0.047	7.0176e-31	Endo_arteries	GRB14
1.72805e-12	1.21848	0.313	0.185	5.79552e-08	Endo_arteries	PLS3
3.24764e-09	1.21563	0.128	0.054	0.000108919	Endo_arteries	HILPDA
6.93628e-25	1.21388	0.253	0.085	2.32629e-20	Endo_arteries	SPECC1
4.6796e-21	1.21218	0.23	0.082	1.56944e-16	Endo_arteries	FAM189A1
1.26431e-19	1.2063	0.472	0.308	4.24025e-15	Endo_arteries	ITPR2
9.87782e-11	1.19971	0.166	0.072	3.31282e-06	Endo_arteries	VCAM1
1.26919e-16	1.19824	0.457	0.298	4.25662e-12	Endo_arteries	FNIP2
2.83222e-15	1.18785	0.306	0.161	9.49871e-11	Endo_arteries	HSPG2
2.36943e-29	1.17577	0.228	0.06	7.94658e-25	Endo_arteries	CDKN1A
1.42439e-15	1.17519	0.577	0.458	4.77711e-11	Endo_arteries	FNDC3B
5.37221e-10	1.17113	0.289	0.178	1.80173e-05	Endo_arteries	EEF1A1
4.31758e-21	1.16173	0.123	0.024	1.44803e-16	Endo_arteries	AC010737.1
1.08029e-11	1.16156	0.36	0.235	3.62307e-07	Endo_arteries	BCR
3.09722e-12	1.15448	0.281	0.156	1.03875e-07	Endo_arteries	OTUD7B
3.6389e-21	1.13923	0.287	0.121	1.22042e-16	Endo_arteries	GAB2
3.23998e-30	1.1343	0.183	0.037	1.08662e-25	Endo_arteries	NTN1
1.08845e-16	1.10643	0.268	0.123	3.65045e-12	Endo_arteries	LRIG1
1.9615e-08	1.10045	0.602	0.559	0.000657849	Endo_arteries	FOXO1
7.89936e-07	1.09343	0.109	0.049	0.0264929	Endo_arteries	CSF1
1.06326e-08	1.08339	0.104	0.04	0.000356596	Endo_arteries	SLIT2
1.21956e-06	1.08046	0.215	0.136	0.0409017	Endo_arteries	NLGN1
2.39158e-11	1.07964	0.272	0.152	8.02089e-07	Endo_arteries	ITGA5
2.98348e-12	1.07743	0.632	0.596	1.0006e-07	Endo_arteries	RAPGEF1
3.14786e-07	1.07365	0.389	0.306	0.0105573	Endo_arteries	PCDH9
6.67052e-18	1.07065	0.194	0.066	2.23716e-13	Endo_arteries	ABI3BP
2.24173e-19	1.0614	0.121	0.025	7.5183e-15	Endo_arteries	GPRC5A
2.23611e-19	1.04992	0.591	0.423	7.49946e-15	Endo_arteries	LDB2
1.53458e-25	1.04381	0.111	0.014	5.14667e-21	Endo_arteries	HEY2
4.39278e-21	1.04261	0.634	0.487	1.47325e-16	Endo_arteries	LPP
1.70972e-10	1.02271	0.296	0.185	5.73405e-06	Endo_arteries	AHCTF1
7.15691e-09	1.01974	0.151	0.069	0.000240028	Endo_arteries	CCDC3
6.00814e-11	1.01676	0.374	0.26	2.01501e-06	Endo_arteries	KIF13B
2.15942e-07	1.01179	0.353	0.267	0.00724227	Endo_arteries	CNKSR3
9.8339e-24	1.00786	0.674	0.549	3.29809e-19	Endo_arteries	PTK2
1.96649e-09	0.999899	0.138	0.059	6.5952e-05	Endo_arteries	UNC5D
4.17137e-09	0.994943	0.215	0.119	0.000139899	Endo_arteries	JUNB
9.41434e-09	0.993974	0.157	0.076	0.000315738	Endo_arteries	PCDH11Y
2.02355e-22	0.982112	0.198	0.058	6.78657e-18	Endo_arteries	FBN1
3.96709e-07	0.978148	0.113	0.051	0.0133048	Endo_arteries	LRFN5
6.04286e-15	0.974703	0.268	0.129	2.02665e-10	Endo_arteries	CACNA2D1
1.42735e-15	0.971459	0.296	0.145	4.78704e-11	Endo_arteries	CARMIL1
1.81619e-18	0.970516	0.111	0.022	6.09114e-14	Endo_arteries	AC007952.4
3.36762e-13	0.961619	0.183	0.076	1.12943e-08	Endo_arteries	CADM1
6.55076e-11	0.958815	0.253	0.139	2.19699e-06	Endo_arteries	ZFP36
1.26938e-12	0.957318	0.257	0.134	4.25726e-08	Endo_arteries	RHOB
2.88134e-16	0.955762	0.3	0.148	9.66345e-12	Endo_arteries	KIAA1217
3.38225e-13	0.952806	0.364	0.218	1.13434e-08	Endo_arteries	TCF7L1
3.00106e-10	0.95034	0.27	0.157	1.0065e-05	Endo_arteries	CD55
3.80407e-07	0.939999	0.3	0.215	0.0127581	Endo_arteries	ABCG1
4.53974e-12	0.938147	0.379	0.245	1.52254e-07	Endo_arteries	YBX3
3.99151e-35	0.936948	0.936	0.921	1.33867e-30	Endo_arteries	NEAT1
8.44002e-07	0.936008	0.234	0.153	0.0283061	Endo_arteries	ARID5B
1.6176e-22	0.935173	0.134	0.026	5.42511e-18	Endo_arteries	SYNPO
3.48249e-10	0.934483	0.366	0.256	1.16796e-05	Endo_arteries	AC013394.1
3.2705e-13	0.934263	0.555	0.446	1.09686e-08	Endo_arteries	ITSN2
7.75489e-26	0.9338	0.868	0.818	2.60084e-21	Endo_arteries	MECOM
7.88139e-12	0.929727	0.147	0.056	2.64326e-07	Endo_arteries	MAFK
4.34017e-10	0.929253	0.304	0.188	1.45561e-05	Endo_arteries	FRMD4B
1.2436e-06	0.927648	0.409	0.333	0.0417078	Endo_arteries	GFOD1
5.6046e-18	0.924602	0.147	0.041	1.87967e-13	Endo_arteries	PLD1
4.51159e-09	0.912653	0.27	0.164	0.00015131	Endo_arteries	MTHFD1L
1.7304e-17	0.906082	0.147	0.041	5.8034e-13	Endo_arteries	FILIP1
1.00998e-14	0.893484	0.138	0.043	3.38728e-10	Endo_arteries	HRH1
4.88168e-13	0.892779	0.134	0.045	1.63722e-08	Endo_arteries	CABLES1
5.34861e-37	0.88654	0.13	0.01	1.79382e-32	Endo_arteries	TC2N
1.82435e-10	0.885705	0.5	0.408	6.11849e-06	Endo_arteries	ABR
5.13091e-16	0.876477	0.232	0.098	1.7208e-11	Endo_arteries	ZEB2
1.75062e-08	0.874777	0.149	0.071	0.000587122	Endo_arteries	HIST1H1E
2.60864e-09	0.874685	0.264	0.161	8.74885e-05	Endo_arteries	PDE3B
1.65326e-07	0.874547	0.121	0.056	0.00554469	Endo_arteries	DDIT4
1.93138e-12	0.872096	0.304	0.172	6.47745e-08	Endo_arteries	GABARAPL1
1.0235e-09	0.861605	0.517	0.427	3.43262e-05	Endo_arteries	CAMK2D
2.4318e-13	0.861033	0.155	0.057	8.15577e-09	Endo_arteries	SLC37A1
1.65425e-08	0.859199	0.223	0.129	0.000554802	Endo_arteries	MYO1D
8.69179e-30	0.858939	0.109	0.009	2.91505e-25	Endo_arteries	LTBP4
4.03044e-10	0.849658	0.106	0.036	1.35173e-05	Endo_arteries	DDAH1
3.79352e-10	0.847481	0.357	0.244	1.27227e-05	Endo_arteries	CAPZA2
1.59047e-10	0.845718	0.655	0.627	5.33411e-06	Endo_arteries	MSI2
2.6148e-11	0.844205	0.238	0.123	8.76952e-07	Endo_arteries	BAALC
2.7376e-07	0.837267	0.296	0.208	0.00918135	Endo_arteries	PIK3C2B
9.72089e-07	0.837028	0.119	0.056	0.0326019	Endo_arteries	EFEMP1
1.0266e-06	0.836744	0.36	0.267	0.03443	Endo_arteries	NUAK1
2.61912e-07	0.823443	0.326	0.236	0.00878401	Endo_arteries	SYT1
1.4227e-08	0.821867	0.181	0.094	0.000477146	Endo_arteries	LTBP1
6.11413e-10	0.814381	0.56	0.489	2.05056e-05	Endo_arteries	CDK17
7.63789e-17	0.807227	0.706	0.611	2.5616e-12	Endo_arteries	PLCB4
2.47666e-13	0.806008	0.134	0.044	8.30623e-09	Endo_arteries	KCNN3
4.39164e-14	0.80582	0.145	0.048	1.47287e-09	Endo_arteries	MB21D2
1.30693e-06	0.803463	0.451	0.384	0.0438318	Endo_arteries	FUT8
2.3215e-08	0.791542	0.134	0.06	0.000778586	Endo_arteries	KYNU
1.51429e-07	0.782698	0.426	0.342	0.00507862	Endo_arteries	VAPA
7.53338e-12	0.779324	0.394	0.267	2.52655e-07	Endo_arteries	SSFA2
1.45995e-18	0.778538	0.104	0.019	4.89638e-14	Endo_arteries	HTR4
4.56161e-09	0.770906	0.115	0.045	0.000152987	Endo_arteries	LRIG3
1.78448e-07	0.769915	0.594	0.552	0.00598478	Endo_arteries	SPAG9
6.77544e-07	0.769525	0.449	0.372	0.0227235	Endo_arteries	STOM
3.57937e-15	0.755104	0.206	0.083	1.20045e-10	Endo_arteries	ABCC1
6.47945e-10	0.749167	0.285	0.17	2.17308e-05	Endo_arteries	MAP2
5.00473e-09	0.746533	0.143	0.063	0.000167849	Endo_arteries	SGIP1
8.98267e-07	0.744654	0.14	0.073	0.0301261	Endo_arteries	SH3RF2
9.63788e-08	0.743822	0.347	0.248	0.00323235	Endo_arteries	BHLHE40
3.4215e-08	0.740076	0.304	0.2	0.0011475	Endo_arteries	DIAPH2
2.46477e-11	0.738005	0.117	0.039	8.26635e-07	Endo_arteries	PALLD
3.57812e-07	0.732923	0.528	0.47	0.0120003	Endo_arteries	PDLIM5
1.23144e-11	0.732182	0.132	0.047	4.12999e-07	Endo_arteries	SH3PXD2B
5.99975e-12	0.732047	0.168	0.069	2.0122e-07	Endo_arteries	PIR
7.26802e-14	0.731266	0.645	0.541	2.43755e-09	Endo_arteries	DOCK4
1.28653e-08	0.729365	0.409	0.308	0.000431475	Endo_arteries	PLCG2
2.174e-10	0.727281	0.16	0.069	7.29117e-06	Endo_arteries	KLHL29
3.34618e-08	0.726645	0.432	0.334	0.00112224	Endo_arteries	DUSP1
6.53643e-08	0.713084	0.166	0.085	0.00219219	Endo_arteries	RFX2
5.1705e-16	0.710907	0.736	0.654	1.73408e-11	Endo_arteries	ARHGAP26
1.02175e-09	0.702185	0.104	0.036	3.42674e-05	Endo_arteries	EPHA7
4.6268e-07	0.69976	0.104	0.045	0.0155174	Endo_arteries	NUDT4
3.79721e-08	0.681509	0.128	0.057	0.00127351	Endo_arteries	TFPI
2.7764e-16	0.679506	0.134	0.037	9.3115e-12	Endo_arteries	ACOT11
1.70913e-09	0.679172	0.202	0.104	5.73208e-05	Endo_arteries	TOX2
7.09102e-08	0.673968	0.6	0.559	0.00237819	Endo_arteries	KMT2E
9.04366e-10	0.672767	0.198	0.098	3.03306e-05	Endo_arteries	RFTN1
2.71752e-09	0.668921	0.143	0.061	9.114e-05	Endo_arteries	RIPK2
6.22953e-07	0.6549	0.206	0.123	0.0208926	Endo_arteries	NTNG1
1.88126e-13	0.642053	0.115	0.033	6.30936e-09	Endo_arteries	FBLN2
9.11129e-08	0.641403	0.468	0.384	0.00305575	Endo_arteries	NAV2
1.71299e-07	0.639719	0.1	0.041	0.00574504	Endo_arteries	AL445426.1
2.42989e-07	0.617369	0.119	0.054	0.00814936	Endo_arteries	NDRG4
1.38208e-06	0.611662	0.164	0.091	0.0463521	Endo_arteries	DANT2
1.26637e-09	0.560087	0.123	0.048	4.24716e-05	Endo_arteries	ITGB4
6.26831e-08	0.53621	0.157	0.077	0.00210227	Endo_arteries	KIAA1549L
5.60562e-09	0.529787	0.828	0.816	0.000188001	Endo_arteries	TCF4
4.13657e-09	0.504315	0.1	0.035	0.000138732	Endo_arteries	DOCK5
2.08242e-08	0.502763	0.14	0.063	0.000698402	Endo_arteries	GLI3
7.23377e-14	0.306615	0.998	1	2.42606e-09	Endo_arteries	MALAT1
