# Supplementary material for: Single-nucleus RNA sequencing of midbrain blood-brain barrier cells in schizophrenia reveals subtle transcriptional changes with overall preservation of cellular proportions and phenotypes
Source: Mol Psychiatry. 2022 Oct 3;27(11):4731–40. doi: 10.1038/s41380-022-01796-0 (PMC9734060; doi:10.1038/s41380-022-01796-0)
Supplement: Supplementary file 5 — Supplementary Table 5 [file 41380_2022_1796_MOESM5_ESM.xlsx]

## Sheet: Ast_protoplasmic1
p_val	avg_log2FC	pct.1	pct.2	p_val_adj	cluster	gene
0	1.21527	0.981	0.785	0	Ast_protoplasmic1	SLC1A2
0	1.08436	0.836	0.435	0	Ast_protoplasmic1	CABLES1
0	1.04985	0.867	0.538	0	Ast_protoplasmic1	SLC6A11
0	1.03138	0.988	0.843	0	Ast_protoplasmic1	NRXN1
0	0.998964	0.389	0.148	0	Ast_protoplasmic1	ARHGAP24
0	0.866522	0.274	0.127	0	Ast_protoplasmic1	CACNA1A
0	0.84843	0.29	0.107	0	Ast_protoplasmic1	GABBR2
0	0.836379	0.413	0.227	0	Ast_protoplasmic1	CCDC129
0	0.806913	0.996	0.926	0	Ast_protoplasmic1	GPC5
0	0.795991	0.906	0.707	0	Ast_protoplasmic1	KCND2
0	0.793942	0.709	0.451	0	Ast_protoplasmic1	GLI3
0	0.790752	0.916	0.753	0	Ast_protoplasmic1	SYNE1
0	0.789559	0.852	0.589	0	Ast_protoplasmic1	FRMD4A
0	0.760068	0.582	0.325	0	Ast_protoplasmic1	CDH23
0	0.752707	0.383	0.175	0	Ast_protoplasmic1	POU6F2
0	0.752263	0.448	0.229	0	Ast_protoplasmic1	PTN
0	0.724667	0.572	0.339	0	Ast_protoplasmic1	TMEM108
0	0.711762	0.791	0.502	0	Ast_protoplasmic1	CACNB2
0	0.695595	0.983	0.926	0	Ast_protoplasmic1	CADM2
5.6887e-223	0.693459	0.203	0.1	1.90787e-218	Ast_protoplasmic1	RIMS1
0	0.688742	0.292	0.133	0	Ast_protoplasmic1	VAV3
0	0.688165	0.689	0.472	0	Ast_protoplasmic1	EYA1
0	0.668844	0.793	0.602	0	Ast_protoplasmic1	GABRB1
0	0.663112	0.259	0.083	0	Ast_protoplasmic1	RHOJ
0	0.660704	0.968	0.871	0	Ast_protoplasmic1	ADGRB3
0	0.659133	0.493	0.313	0	Ast_protoplasmic1	AC012593.1
0	0.655827	0.378	0.183	0	Ast_protoplasmic1	SEMA3E
0	0.64606	0.329	0.148	0	Ast_protoplasmic1	CA12
0	0.63612	0.211	0.078	0	Ast_protoplasmic1	AL591686.2
0	0.632595	0.353	0.159	0	Ast_protoplasmic1	SH3RF1
0	0.626266	0.454	0.25	0	Ast_protoplasmic1	EFNA5
0	0.596097	0.696	0.488	0	Ast_protoplasmic1	SLC6A1
0	0.596031	0.971	0.831	0	Ast_protoplasmic1	HPSE2
0	0.59441	0.684	0.477	0	Ast_protoplasmic1	EGFR
0	0.58989	0.615	0.397	0	Ast_protoplasmic1	CHST11
1.2106e-205	0.573324	0.328	0.2	4.06013e-201	Ast_protoplasmic1	LINC00499
0	0.570224	0.439	0.257	0	Ast_protoplasmic1	GPSM2
0	0.568746	0.856	0.634	0	Ast_protoplasmic1	LRRC4C
4.28814e-278	0.568028	0.19	0.079	1.43816e-273	Ast_protoplasmic1	GUCY1A2
0	0.567102	0.393	0.225	0	Ast_protoplasmic1	CTXND1
0	0.564984	0.509	0.324	0	Ast_protoplasmic1	FSTL5
0	0.562586	0.514	0.321	0	Ast_protoplasmic1	ZFHX4
0	0.559244	0.595	0.408	0	Ast_protoplasmic1	BRINP3
0	0.556176	0.243	0.102	0	Ast_protoplasmic1	NRSN1
1.25599e-196	0.556148	0.156	0.07	4.21236e-192	Ast_protoplasmic1	AC007402.1
1.8185e-293	0.555939	0.349	0.195	6.09888e-289	Ast_protoplasmic1	NCAN
0	0.552259	0.826	0.659	0	Ast_protoplasmic1	DGKG
0	0.546207	0.822	0.671	0	Ast_protoplasmic1	NHSL1
1.52088e-273	0.54238	0.28	0.145	5.10071e-269	Ast_protoplasmic1	KCNJ16
0	0.53902	0.514	0.332	0	Ast_protoplasmic1	C2orf72
0	0.535606	0.942	0.857	0	Ast_protoplasmic1	TNIK
0	0.535112	0.882	0.755	0	Ast_protoplasmic1	NKAIN3
0	0.533964	0.363	0.192	0	Ast_protoplasmic1	ABCD2
0	0.533481	0.847	0.684	0	Ast_protoplasmic1	RGS7
0	0.525954	0.691	0.503	0	Ast_protoplasmic1	FGD4
0	0.5238	0.401	0.234	0	Ast_protoplasmic1	PTCH1
0	0.516509	0.54	0.356	0	Ast_protoplasmic1	RORB
0	0.513142	0.6	0.414	0	Ast_protoplasmic1	GRAMD1C
1.73783e-300	0.513065	0.237	0.107	5.82832e-296	Ast_protoplasmic1	AGMO
0	0.511008	0.966	0.91	0	Ast_protoplasmic1	GPM6A
0	0.501175	0.687	0.488	0	Ast_protoplasmic1	MMD2
0	0.50066	0.487	0.302	0	Ast_protoplasmic1	ROBO1
6.15085e-170	0.500077	0.241	0.14	2.06287e-165	Ast_protoplasmic1	AF279873.3
1.37456e-280	0.497826	0.459	0.292	4.61002e-276	Ast_protoplasmic1	NR2F2-AS1
0	0.497646	0.946	0.866	0	Ast_protoplasmic1	ADGRL3
2.07923e-295	0.497504	0.512	0.345	6.97331e-291	Ast_protoplasmic1	GRIA2
5.89598e-145	0.496115	0.304	0.202	1.9774e-140	Ast_protoplasmic1	GRM5
2.33489e-224	0.490359	0.472	0.327	7.83074e-220	Ast_protoplasmic1	AL589740.1
0	0.490093	0.678	0.52	0	Ast_protoplasmic1	STXBP5
2.32906e-307	0.486075	0.687	0.534	7.81119e-303	Ast_protoplasmic1	LINC00299
0	0.484923	0.318	0.163	0	Ast_protoplasmic1	GPAM
0	0.484553	0.941	0.818	0	Ast_protoplasmic1	PLCB1
0	0.483891	0.793	0.63	0	Ast_protoplasmic1	PDE7B
2.56278e-173	0.479593	0.233	0.131	8.59504e-169	Ast_protoplasmic1	KCNQ3
6.31656e-210	0.476424	0.26	0.143	2.11845e-205	Ast_protoplasmic1	LGR6
5.67025e-209	0.476423	0.508	0.37	1.90169e-204	Ast_protoplasmic1	MRAS
1.50437e-264	0.471203	0.462	0.301	5.04537e-260	Ast_protoplasmic1	SLC25A48
0	0.471053	0.813	0.668	0	Ast_protoplasmic1	SFXN5
0	0.4691	0.791	0.64	0	Ast_protoplasmic1	CARMIL1
0	0.467818	0.788	0.642	0	Ast_protoplasmic1	PREX2
3.29422e-266	0.46551	0.398	0.24	1.10482e-261	Ast_protoplasmic1	XYLT1
2.45686e-307	0.464581	0.691	0.541	8.23983e-303	Ast_protoplasmic1	CEP85L
2.2406e-269	0.464057	0.645	0.494	7.51451e-265	Ast_protoplasmic1	OTUD7A
7.71069e-259	0.463757	0.534	0.376	2.58601e-254	Ast_protoplasmic1	ACSS1
4.8196e-257	0.46355	0.463	0.302	1.6164e-252	Ast_protoplasmic1	KCTD8
3.3347e-284	0.462288	0.411	0.25	1.11839e-279	Ast_protoplasmic1	STOX1
1.38288e-268	0.462128	0.667	0.52	4.6379e-264	Ast_protoplasmic1	ZNRF3
0	0.457728	0.994	0.974	0	Ast_protoplasmic1	LRP1B
2.3841e-247	0.457405	0.458	0.302	7.9958e-243	Ast_protoplasmic1	SLC35F1
3.84149e-224	0.452878	0.357	0.22	1.28836e-219	Ast_protoplasmic1	BRINP2
0	0.452479	0.855	0.725	0	Ast_protoplasmic1	SLC4A4
1.20825e-190	0.448686	0.471	0.34	4.05222e-186	Ast_protoplasmic1	EGLN3
0	0.442809	0.969	0.886	0	Ast_protoplasmic1	RNF219-AS1
3.71456e-228	0.442162	0.464	0.312	1.24579e-223	Ast_protoplasmic1	KCNIP1
0	0.441124	0.978	0.926	0	Ast_protoplasmic1	ERBB4
7.62892e-254	0.440574	0.631	0.488	2.55859e-249	Ast_protoplasmic1	CHPT1
1.90933e-295	0.438215	0.571	0.389	6.40351e-291	Ast_protoplasmic1	EDNRB
0	0.437976	0.843	0.69	0	Ast_protoplasmic1	C1orf61
1.0999e-208	0.437409	0.457	0.312	3.68885e-204	Ast_protoplasmic1	FRMPD4
2.70393e-161	0.436287	0.213	0.12	9.06844e-157	Ast_protoplasmic1	SPRY4-AS1
3.90841e-209	0.435989	0.156	0.068	1.3108e-204	Ast_protoplasmic1	AMZ1
1.92926e-275	0.434328	0.234	0.11	6.47036e-271	Ast_protoplasmic1	CYP2J2
1.40532e-265	0.432427	0.347	0.199	4.71317e-261	Ast_protoplasmic1	HTRA1
2.79494e-241	0.431902	0.345	0.204	9.37365e-237	Ast_protoplasmic1	ASRGL1
1.99303e-235	0.430377	0.374	0.233	6.68423e-231	Ast_protoplasmic1	CD47
3.23272e-235	0.429642	0.605	0.454	1.08419e-230	Ast_protoplasmic1	FLRT2
4.89092e-243	0.428056	0.4	0.251	1.64032e-238	Ast_protoplasmic1	MERTK
1.9094e-260	0.423412	0.617	0.451	6.40375e-256	Ast_protoplasmic1	GRK3
4.27644e-208	0.421642	0.462	0.32	1.43423e-203	Ast_protoplasmic1	FAM198B-AS1
1.23456e-156	0.419578	0.588	0.469	4.14048e-152	Ast_protoplasmic1	AC002429.2
2.30861e-201	0.415144	0.262	0.146	7.74261e-197	Ast_protoplasmic1	LRFN2
0	0.41499	0.995	0.969	0	Ast_protoplasmic1	TRPM3
2.99193e-227	0.412324	0.494	0.342	1.00343e-222	Ast_protoplasmic1	CPEB3
1.22757e-220	0.411419	0.3	0.173	4.11702e-216	Ast_protoplasmic1	ATL2
2.77235e-226	0.410991	0.506	0.355	9.29791e-222	Ast_protoplasmic1	CHKA
7.07765e-206	0.40929	0.395	0.258	2.3737e-201	Ast_protoplasmic1	LRP4
0	0.40824	0.99	0.968	0	Ast_protoplasmic1	RORA
7.01342e-201	0.407765	0.548	0.414	2.35216e-196	Ast_protoplasmic1	KLHL32
3.54343e-207	0.406895	0.467	0.322	1.1884e-202	Ast_protoplasmic1	RANBP3L
1.60949e-123	0.405442	0.283	0.189	5.39791e-119	Ast_protoplasmic1	LCNL1
3.07446e-179	0.40131	0.458	0.324	1.03111e-174	Ast_protoplasmic1	HIP1R
5.44615e-271	0.400483	0.729	0.59	1.82653e-266	Ast_protoplasmic1	ASPH
6.48036e-197	0.400159	0.449	0.312	2.17338e-192	Ast_protoplasmic1	LMO3
2.82256e-201	0.399103	0.587	0.457	9.4663e-197	Ast_protoplasmic1	CEP350
6.67521e-249	0.398373	0.668	0.515	2.23873e-244	Ast_protoplasmic1	OSBPL6
4.60235e-185	0.397699	0.709	0.588	1.54354e-180	Ast_protoplasmic1	MACROD2
8.28483e-210	0.397467	0.152	0.064	2.77857e-205	Ast_protoplasmic1	DGKZ
2.06369e-239	0.396789	0.647	0.497	6.9212e-235	Ast_protoplasmic1	SMARCA2
2.70833e-238	0.396389	0.685	0.535	9.0832e-234	Ast_protoplasmic1	MAGI1
6.20614e-211	0.396091	0.186	0.087	2.08142e-206	Ast_protoplasmic1	SLC22A3
0	0.394856	0.888	0.74	0	Ast_protoplasmic1	RGS6
1.5943e-204	0.392796	0.179	0.084	5.34696e-200	Ast_protoplasmic1	RANBP17
7.46588e-228	0.392709	0.229	0.116	2.50391e-223	Ast_protoplasmic1	AL158840.1
1.97421e-140	0.392532	0.353	0.244	6.62111e-136	Ast_protoplasmic1	KCNMB2-AS1
1.85301e-211	0.388977	0.578	0.429	6.21464e-207	Ast_protoplasmic1	FGFR3
4.84786e-214	0.388065	0.693	0.566	1.62588e-209	Ast_protoplasmic1	NR3C2
3.45018e-208	0.386814	0.587	0.442	1.15712e-203	Ast_protoplasmic1	ALCAM
9.45819e-196	0.385995	0.377	0.245	3.17209e-191	Ast_protoplasmic1	PAPLN
0	0.385982	0.891	0.784	0	Ast_protoplasmic1	MGAT4C
1.04743e-170	0.381619	0.518	0.394	3.51288e-166	Ast_protoplasmic1	PIK3C2A
1.01371e-182	0.380659	0.209	0.11	3.39978e-178	Ast_protoplasmic1	SLC7A10
7.8218e-192	0.380451	0.324	0.199	2.62328e-187	Ast_protoplasmic1	C10orf90
9.56109e-157	0.379189	0.568	0.447	3.2066e-152	Ast_protoplasmic1	AC087564.1
3.33495e-187	0.377221	0.254	0.144	1.11848e-182	Ast_protoplasmic1	BICC1
3.3263e-66	0.376791	0.244	0.18	1.11557e-61	Ast_protoplasmic1	PTPRT
0	0.37666	0.977	0.941	0	Ast_protoplasmic1	MAGI2
0	0.3762	0.934	0.859	0	Ast_protoplasmic1	NTRK2
9.68043e-190	0.375222	0.738	0.619	3.24662e-185	Ast_protoplasmic1	TENM2
1.89566e-182	0.374318	0.512	0.372	6.35767e-178	Ast_protoplasmic1	PLXNA2
4.57853e-285	0.371912	0.743	0.565	1.53555e-280	Ast_protoplasmic1	GRID2
8.39744e-172	0.371016	0.156	0.074	2.81633e-167	Ast_protoplasmic1	SHC3
1.53413e-180	0.370798	0.368	0.242	5.14518e-176	Ast_protoplasmic1	DLC1
5.2064e-180	0.370687	0.189	0.096	1.74612e-175	Ast_protoplasmic1	XAF1
0	0.370587	0.944	0.851	0	Ast_protoplasmic1	FAM155A
1.60847e-175	0.37058	0.551	0.418	5.39449e-171	Ast_protoplasmic1	AC091826.2
1.26097e-173	0.370246	0.473	0.342	4.22903e-169	Ast_protoplasmic1	ZMYND8
1.11039e-151	0.369674	0.503	0.379	3.72402e-147	Ast_protoplasmic1	CDH10
6.33238e-172	0.367548	0.565	0.431	2.12375e-167	Ast_protoplasmic1	NDRG2
1.13395e-206	0.367548	0.64	0.491	3.80303e-202	Ast_protoplasmic1	ENOX1
6.9454e-64	0.366429	0.269	0.204	2.32935e-59	Ast_protoplasmic1	AC010099.4
5.53073e-171	0.363697	0.113	0.044	1.8549e-166	Ast_protoplasmic1	AC022639.1
6.47273e-252	0.363156	0.83	0.706	2.17083e-247	Ast_protoplasmic1	ATP1A2
4.0322e-185	0.363121	0.133	0.056	1.35232e-180	Ast_protoplasmic1	PLD5
5.59799e-267	0.361816	0.108	0.029	1.87745e-262	Ast_protoplasmic1	LINC00645
2.60986e-301	0.360634	0.88	0.785	8.75293e-297	Ast_protoplasmic1	ZSWIM6
2.40677e-186	0.357473	0.609	0.475	8.07183e-182	Ast_protoplasmic1	PTPN13
9.82323e-222	0.356486	0.181	0.081	3.29451e-217	Ast_protoplasmic1	ETV1
9.71601e-230	0.355365	0.751	0.627	3.25855e-225	Ast_protoplasmic1	LINC00461
2.24973e-153	0.354154	0.244	0.145	7.54515e-149	Ast_protoplasmic1	CNTFR
4.16287e-158	0.354051	0.196	0.106	1.39614e-153	Ast_protoplasmic1	SLC6A1-AS1
6.61971e-154	0.353401	0.473	0.346	2.22012e-149	Ast_protoplasmic1	TOX
6.97116e-262	0.352259	0.878	0.783	2.33799e-257	Ast_protoplasmic1	LHFPL6
3.78663e-216	0.351625	0.671	0.514	1.26996e-211	Ast_protoplasmic1	ESRRG
6.81666e-148	0.350588	0.205	0.115	2.28617e-143	Ast_protoplasmic1	ROR1
5.11874e-209	0.348803	0.6	0.449	1.71672e-204	Ast_protoplasmic1	SORCS2
2.55618e-114	0.348433	0.169	0.097	8.57291e-110	Ast_protoplasmic1	PPP1R3C
2.15429e-164	0.347723	0.273	0.165	7.22507e-160	Ast_protoplasmic1	PPP2R2C
9.08693e-226	0.347372	0.77	0.652	3.04757e-221	Ast_protoplasmic1	CHD9
1.32536e-154	0.347076	0.453	0.329	4.44501e-150	Ast_protoplasmic1	MLLT3
8.32059e-157	0.344834	0.175	0.09	2.79056e-152	Ast_protoplasmic1	ADGRB1
1.27695e-239	0.343902	0.827	0.695	4.28265e-235	Ast_protoplasmic1	SPON1
3.83478e-152	0.343367	0.386	0.266	1.28611e-147	Ast_protoplasmic1	RBMS3
2.7235e-146	0.342024	0.257	0.159	9.13406e-142	Ast_protoplasmic1	AMER2
9.86201e-183	0.339636	0.594	0.45	3.30752e-178	Ast_protoplasmic1	ETNPPL
1.08389e-178	0.338708	0.668	0.533	3.63514e-174	Ast_protoplasmic1	ATP2B2
5.3651e-185	0.338522	0.721	0.599	1.79935e-180	Ast_protoplasmic1	PHLPP1
5.22332e-134	0.338087	0.251	0.157	1.7518e-129	Ast_protoplasmic1	AC115622.1
2.113e-222	0.337739	0.784	0.652	7.0866e-218	Ast_protoplasmic1	PDE4D
2.58875e-149	0.336849	0.53	0.408	8.68215e-145	Ast_protoplasmic1	PTPRK
5.42483e-153	0.333668	0.596	0.477	1.81938e-148	Ast_protoplasmic1	ITSN1
5.97672e-208	0.331754	0.156	0.067	2.00447e-203	Ast_protoplasmic1	GJB6
0	0.330505	0.95	0.903	0	Ast_protoplasmic1	SOX5
4.82509e-151	0.328835	0.165	0.084	1.61824e-146	Ast_protoplasmic1	PLA2G5
1.20761e-113	0.327963	0.269	0.177	4.0501e-109	Ast_protoplasmic1	PDK4
1.77817e-140	0.327247	0.371	0.259	5.96364e-136	Ast_protoplasmic1	USP3
9.82476e-150	0.327193	0.417	0.295	3.29503e-145	Ast_protoplasmic1	ABHD2
4.58383e-186	0.326278	0.766	0.658	1.53733e-181	Ast_protoplasmic1	NFIB
8.2797e-137	0.326011	0.297	0.195	2.77684e-132	Ast_protoplasmic1	FAM184A
1.89663e-158	0.32584	0.515	0.382	6.36091e-154	Ast_protoplasmic1	PID1
6.90277e-262	0.325024	0.962	0.919	2.31505e-257	Ast_protoplasmic1	CTNNA2
0	0.324365	0.996	0.984	0	Ast_protoplasmic1	PCDH9
8.55443e-303	0.323655	0.894	0.804	2.86898e-298	Ast_protoplasmic1	PDE4B
5.98446e-144	0.322158	0.389	0.27	2.00707e-139	Ast_protoplasmic1	PPARGC1A
5.59371e-136	0.322004	0.285	0.184	1.87602e-131	Ast_protoplasmic1	RAB8B
8.51168e-116	0.32187	0.204	0.124	2.85465e-111	Ast_protoplasmic1	NME9
1.12372e-122	0.321102	0.598	0.49	3.76872e-118	Ast_protoplasmic1	PSD2
6.87887e-127	0.320725	0.266	0.171	2.30704e-122	Ast_protoplasmic1	XKR6
5.21509e-145	0.320044	0.401	0.283	1.74904e-140	Ast_protoplasmic1	CGNL1
4.29348e-147	0.319867	0.749	0.652	1.43995e-142	Ast_protoplasmic1	CACNA2D3
7.73169e-155	0.319098	0.614	0.49	2.59305e-150	Ast_protoplasmic1	TPCN1
1.66222e-284	0.318577	0.95	0.888	5.57476e-280	Ast_protoplasmic1	CDH20
1.62702e-141	0.31833	0.529	0.408	5.45669e-137	Ast_protoplasmic1	SPATS2L
1.54383e-94	0.318291	0.576	0.486	5.17769e-90	Ast_protoplasmic1	SGCD
2.19588e-133	0.31804	0.487	0.369	7.36455e-129	Ast_protoplasmic1	PRDM16
1.82447e-120	0.317036	0.354	0.25	6.11891e-116	Ast_protoplasmic1	OLFM2
6.7322e-123	0.316733	0.126	0.062	2.25785e-118	Ast_protoplasmic1	RPH3A
4.6142e-140	0.314208	0.167	0.088	1.54751e-135	Ast_protoplasmic1	ZIC1
1.10627e-135	0.314132	0.274	0.175	3.71021e-131	Ast_protoplasmic1	MIAT
4.23043e-178	0.313251	0.73	0.596	1.4188e-173	Ast_protoplasmic1	TRIM9
1.016e-150	0.313142	0.595	0.471	3.40745e-146	Ast_protoplasmic1	LAMA4
2.13578e-222	0.312692	0.859	0.764	7.16298e-218	Ast_protoplasmic1	SASH1
2.36353e-92	0.312017	0.312	0.226	7.9268e-88	Ast_protoplasmic1	C4orf19
8.23268e-153	0.309656	0.566	0.437	2.76108e-148	Ast_protoplasmic1	GJA1
1.09674e-167	0.309517	0.163	0.079	3.67826e-163	Ast_protoplasmic1	AC087477.2
1.02271e-124	0.308951	0.348	0.243	3.42996e-120	Ast_protoplasmic1	SLC39A12
4.75308e-161	0.308648	0.618	0.486	1.59409e-156	Ast_protoplasmic1	PLPP3
6.13516e-174	0.308584	0.714	0.587	2.05761e-169	Ast_protoplasmic1	HIF3A
2.68425e-151	0.307598	0.113	0.047	9.00242e-147	Ast_protoplasmic1	NRP1
1.1496e-178	0.30694	0.749	0.626	3.85551e-174	Ast_protoplasmic1	ACOT11
7.41576e-140	0.306809	0.217	0.127	2.4871e-135	Ast_protoplasmic1	TMEM241
1.88528e-180	0.30594	0.803	0.699	6.32286e-176	Ast_protoplasmic1	LRMDA
3.98702e-168	0.305503	0.148	0.068	1.33717e-163	Ast_protoplasmic1	AL590617.2
3.91515e-142	0.304613	0.104	0.043	1.31306e-137	Ast_protoplasmic1	GRM3
3.97956e-201	0.301178	0.671	0.519	1.33466e-196	Ast_protoplasmic1	LINC00511
3.77097e-109	0.300887	0.335	0.237	1.26471e-104	Ast_protoplasmic1	SNAP25
4.17969e-117	0.300738	0.414	0.309	1.40179e-112	Ast_protoplasmic1	PHKA1
7.37905e-149	0.300605	0.151	0.075	2.47479e-144	Ast_protoplasmic1	DIO2
7.19952e-34	0.300557	0.22	0.176	2.41457e-29	Ast_protoplasmic1	SGCZ
1.5029e-101	0.298431	0.354	0.259	5.04043e-97	Ast_protoplasmic1	GNG7
2.18429e-82	0.298277	0.158	0.098	7.32568e-78	Ast_protoplasmic1	UNC5C
4.41441e-113	0.297478	0.468	0.363	1.48051e-108	Ast_protoplasmic1	RNPC3
3.51461e-113	0.29714	0.344	0.242	1.17873e-108	Ast_protoplasmic1	NAT8L
1.77587e-30	0.295628	0.177	0.138	5.95592e-26	Ast_protoplasmic1	AC104574.2
1.07056e-110	0.295495	0.391	0.289	3.59044e-106	Ast_protoplasmic1	SEC14L1
3.06004e-107	0.295279	0.118	0.06	1.02628e-102	Ast_protoplasmic1	RASGRF1
9.98832e-159	0.295234	0.69	0.575	3.34988e-154	Ast_protoplasmic1	MAST4
1.38417e-135	0.294999	0.286	0.185	4.64222e-131	Ast_protoplasmic1	KLHL2
3.12208e-141	0.294083	0.557	0.432	1.04708e-136	Ast_protoplasmic1	TTYH1
1.26617e-102	0.293306	0.428	0.326	4.24649e-98	Ast_protoplasmic1	PLEKHA6
1.63191e-125	0.292984	0.594	0.476	5.47309e-121	Ast_protoplasmic1	LGI1
5.35457e-170	0.292806	0.436	0.304	1.79581e-165	Ast_protoplasmic1	SPRED1
8.54917e-119	0.292299	0.295	0.198	2.86722e-114	Ast_protoplasmic1	PDGFRB
4.59558e-113	0.292097	0.796	0.718	1.54127e-108	Ast_protoplasmic1	LUZP2
4.20781e-114	0.291629	0.272	0.18	1.41121e-109	Ast_protoplasmic1	ENTPD1
2.23417e-177	0.290765	0.156	0.072	7.49295e-173	Ast_protoplasmic1	ENPP5
5.62317e-128	0.289828	0.219	0.131	1.8859e-123	Ast_protoplasmic1	AL365273.2
3.33757e-102	0.289383	0.487	0.387	1.11936e-97	Ast_protoplasmic1	AC108866.1
3.68568e-120	0.287518	0.274	0.179	1.2361e-115	Ast_protoplasmic1	MAOA
2.25226e-128	0.28725	0.615	0.5	7.55364e-124	Ast_protoplasmic1	LAMA1
1.00874e-105	0.286649	0.416	0.314	3.38311e-101	Ast_protoplasmic1	PTCHD1
3.65959e-121	0.28596	0.624	0.514	1.22735e-116	Ast_protoplasmic1	TOM1L2
6.98844e-121	0.28579	0.598	0.481	2.34378e-116	Ast_protoplasmic1	SHROOM3
1.00659e-121	0.285395	0.291	0.193	3.37591e-117	Ast_protoplasmic1	FUT10
1.53734e-116	0.284435	0.555	0.446	5.15594e-112	Ast_protoplasmic1	MEGF10
2.35659e-112	0.284297	0.6	0.499	7.90352e-108	Ast_protoplasmic1	JARID2
1.39943e-133	0.284242	0.741	0.646	4.69341e-129	Ast_protoplasmic1	OPHN1
6.36149e-142	0.284107	0.647	0.529	2.13352e-137	Ast_protoplasmic1	CECR2
2.21021e-114	0.283862	0.326	0.227	7.4126e-110	Ast_protoplasmic1	FAM171B
2.9817e-111	0.281156	0.602	0.501	1e-106	Ast_protoplasmic1	KLF12
1.24931e-101	0.280709	0.23	0.15	4.18995e-97	Ast_protoplasmic1	CAMK4
1.48696e-104	0.27988	0.262	0.175	4.98698e-100	Ast_protoplasmic1	KCNJ10
4.3862e-117	0.278935	0.229	0.144	1.47105e-112	Ast_protoplasmic1	ELOVL2
9.17224e-119	0.277678	0.294	0.197	3.07619e-114	Ast_protoplasmic1	NLGN4X
3.68629e-139	0.277665	0.694	0.576	1.23631e-134	Ast_protoplasmic1	IQCA1
1.15526e-138	0.27662	0.73	0.633	3.87453e-134	Ast_protoplasmic1	TCF7L2
9.15894e-99	0.276127	0.371	0.275	3.07173e-94	Ast_protoplasmic1	SLCO1C1
5.41261e-138	0.275237	0.719	0.601	1.81528e-133	Ast_protoplasmic1	SGIP1
7.46215e-126	0.271195	0.666	0.565	2.50265e-121	Ast_protoplasmic1	NEO1
1.43138e-134	0.270768	0.694	0.584	4.80057e-130	Ast_protoplasmic1	ATP13A4
2.1483e-87	0.270396	0.149	0.088	7.20497e-83	Ast_protoplasmic1	MIR2052HG
1.28993e-105	0.269003	0.484	0.378	4.32616e-101	Ast_protoplasmic1	GRAMD1B
1.5887e-99	0.268359	0.286	0.199	5.32817e-95	Ast_protoplasmic1	PTAR1
6.35994e-103	0.266573	0.535	0.429	2.133e-98	Ast_protoplasmic1	CTIF
2.59736e-105	0.265155	0.392	0.291	8.71102e-101	Ast_protoplasmic1	PCDH17
7.42797e-97	0.264806	0.638	0.537	2.49119e-92	Ast_protoplasmic1	ANKDD1A
8.89188e-102	0.264586	0.413	0.311	2.98216e-97	Ast_protoplasmic1	TNS3
1.00142e-126	0.264123	0.681	0.573	3.35855e-122	Ast_protoplasmic1	ACACB
1.80494e-104	0.263414	0.339	0.242	6.05341e-100	Ast_protoplasmic1	ABAT
3.84718e-93	0.262321	0.238	0.16	1.29027e-88	Ast_protoplasmic1	AL136366.1
1.2958e-125	0.262063	0.151	0.079	4.34587e-121	Ast_protoplasmic1	MFGE8
2.68537e-87	0.261928	0.138	0.08	9.0062e-83	Ast_protoplasmic1	STXBP6
7.77452e-95	0.261482	0.515	0.416	2.60742e-90	Ast_protoplasmic1	MEGF9
2.16983e-99	0.260697	0.103	0.051	7.27718e-95	Ast_protoplasmic1	COL12A1
5.29988e-112	0.260609	0.299	0.204	1.77747e-107	Ast_protoplasmic1	MYBPC1
4.11596e-110	0.260077	0.273	0.18	1.38041e-105	Ast_protoplasmic1	OTX2-AS1
3.9737e-150	0.260003	0.102	0.041	1.3327e-145	Ast_protoplasmic1	SLC13A5
2.40365e-111	0.259765	0.682	0.584	8.06137e-107	Ast_protoplasmic1	TAOK3
0	0.25849	0.997	0.993	0	Ast_protoplasmic1	LSAMP
5.71483e-106	0.258059	0.229	0.146	1.91664e-101	Ast_protoplasmic1	CKMT2
3.91855e-96	0.257852	0.447	0.349	1.3142e-91	Ast_protoplasmic1	ASAP2
7.98127e-96	0.257767	0.274	0.189	2.67676e-91	Ast_protoplasmic1	RIPOR2
2.49575e-151	0.257473	0.866	0.788	8.37024e-147	Ast_protoplasmic1	RPS6KA2
2.45874e-166	0.256744	0.908	0.855	8.24613e-162	Ast_protoplasmic1	SLC1A3
4.12245e-99	0.256473	0.403	0.301	1.38259e-94	Ast_protoplasmic1	ARRB1
1.01987e-80	0.25633	0.283	0.204	3.42045e-76	Ast_protoplasmic1	AC036214.1
2.00838e-97	0.255998	0.579	0.479	6.73569e-93	Ast_protoplasmic1	PHF21B
1.49856e-138	0.255356	0.841	0.764	5.02588e-134	Ast_protoplasmic1	CAMTA1
2.48901e-103	0.254583	0.697	0.597	8.34766e-99	Ast_protoplasmic1	SRGAP3
1.62239e-98	0.253791	0.222	0.144	5.44119e-94	Ast_protoplasmic1	MGLL
5.97694e-95	0.253305	0.496	0.395	2.00454e-90	Ast_protoplasmic1	LIMS1
2.9168e-125	0.252573	0.782	0.687	9.78237e-121	Ast_protoplasmic1	EFEMP1
1.39317e-87	0.252284	0.242	0.165	4.67241e-83	Ast_protoplasmic1	LYPD6
2.02881e-89	0.251816	0.581	0.488	6.80423e-85	Ast_protoplasmic1	C1orf21
2.76917e-74	0.251433	0.363	0.279	9.28724e-70	Ast_protoplasmic1	PEBP4
1.51868e-92	0.251361	0.391	0.295	5.09336e-88	Ast_protoplasmic1	KIAA0319
9.01645e-92	0.251175	0.332	0.242	3.02394e-87	Ast_protoplasmic1	AGL
3.56561e-77	0.25103	0.453	0.361	1.19583e-72	Ast_protoplasmic1	RHBDL3
6.70608e-90	0.250759	0.232	0.156	2.24909e-85	Ast_protoplasmic1	SLC30A10
3.84818e-97	0.250553	0.129	0.07	1.2906e-92	Ast_protoplasmic1	SH2B2

## Sheet: Ast_protoplasmic2
p_val	avg_log2FC	pct.1	pct.2	p_val_adj	cluster	gene
0	1.00007	0.471	0.215	0	Ast_protoplasmic2	SHISA9
0	0.992094	0.885	0.654	0	Ast_protoplasmic2	LRRC4C
0	0.981681	0.806	0.571	0	Ast_protoplasmic2	GRID2
0	0.977284	0.217	0.041	0	Ast_protoplasmic2	AC090809.1
0	0.942002	0.699	0.424	0	Ast_protoplasmic2	SHISA6
0	0.901543	0.483	0.215	0	Ast_protoplasmic2	GREB1L
0	0.828	0.858	0.658	0	Ast_protoplasmic2	SPARCL1
0	0.792935	0.796	0.538	0	Ast_protoplasmic2	CACNB2
0	0.765792	0.717	0.522	0	Ast_protoplasmic2	ESRRG
0	0.764887	0.682	0.485	0	Ast_protoplasmic2	PDZD2
0	0.759308	0.285	0.117	0	Ast_protoplasmic2	U91319.1
0	0.758939	0.276	0.094	0	Ast_protoplasmic2	CPNE5
0	0.734841	0.357	0.171	0	Ast_protoplasmic2	GRIA4
0	0.721368	0.751	0.524	0	Ast_protoplasmic2	RALYL
0	0.708949	0.599	0.405	0	Ast_protoplasmic2	EDNRB
7.83833e-290	0.708867	0.242	0.106	2.62882e-285	Ast_protoplasmic2	AC009975.1
0	0.704944	0.522	0.301	0	Ast_protoplasmic2	NTN1
0	0.690419	0.233	0.077	0	Ast_protoplasmic2	EPHA4
0	0.66241	0.823	0.658	0	Ast_protoplasmic2	PDE4D
0	0.648212	0.775	0.504	0	Ast_protoplasmic2	CABLES1
6.45569e-132	0.619824	0.331	0.218	2.16511e-127	Ast_protoplasmic2	LRFN5
0	0.616044	0.89	0.756	0	Ast_protoplasmic2	FAT3
1.07573e-130	0.598807	0.268	0.169	3.60779e-126	Ast_protoplasmic2	SGCZ
1.0808e-227	0.593756	0.31	0.169	3.62479e-223	Ast_protoplasmic2	PTPRT
1.34854e-276	0.588286	0.535	0.364	4.52272e-272	Ast_protoplasmic2	DOCK5
0	0.585319	0.821	0.632	0	Ast_protoplasmic2	FRMD4A
2.63327e-241	0.581476	0.46	0.301	8.83145e-237	Ast_protoplasmic2	ITPR1
2.20994e-117	0.564799	0.137	0.068	7.41171e-113	Ast_protoplasmic2	GRIA1
0	0.558967	0.203	0.069	0	Ast_protoplasmic2	MKX
8.48598e-229	0.539784	0.675	0.517	2.84603e-224	Ast_protoplasmic2	MMD2
0	0.535436	0.895	0.757	0	Ast_protoplasmic2	RGS6
4.43804e-219	0.529211	0.308	0.172	1.48843e-214	Ast_protoplasmic2	MPPED2
3.85496e-210	0.528228	0.399	0.254	1.29288e-205	Ast_protoplasmic2	SLC1A4
9.7834e-184	0.523306	0.339	0.205	3.28116e-179	Ast_protoplasmic2	GRM5
3.80629e-161	0.517212	0.242	0.136	1.27655e-156	Ast_protoplasmic2	AP002991.1
4.11005e-229	0.512336	0.645	0.505	1.37843e-224	Ast_protoplasmic2	STK32A
7.35142e-213	0.505889	0.518	0.362	2.46552e-208	Ast_protoplasmic2	CSMD3
5.67608e-178	0.493604	0.395	0.258	1.90364e-173	Ast_protoplasmic2	PTCH1
2.36818e-159	0.489954	0.391	0.257	7.94241e-155	Ast_protoplasmic2	CCDC129
0	0.482813	0.989	0.936	0	Ast_protoplasmic2	GPC5
2.60593e-247	0.481491	0.771	0.666	8.73976e-243	Ast_protoplasmic2	PCDH7
3.44507e-168	0.478398	0.271	0.155	1.15541e-163	Ast_protoplasmic2	LGR6
0	0.475481	0.932	0.837	0	Ast_protoplasmic2	PLCB1
0	0.470841	0.948	0.889	0	Ast_protoplasmic2	ADGRB3
0	0.470507	0.946	0.856	0	Ast_protoplasmic2	HPSE2
3.78039e-119	0.4703	0.379	0.266	1.26787e-114	Ast_protoplasmic2	XYLT1
0	0.467582	0.961	0.899	0	Ast_protoplasmic2	RNF219-AS1
1.07018e-224	0.461497	0.726	0.608	3.58916e-220	Ast_protoplasmic2	LIMCH1
2.81884e-148	0.452118	0.211	0.114	9.45384e-144	Ast_protoplasmic2	SAMD5
1.74276e-172	0.438336	0.606	0.476	5.84486e-168	Ast_protoplasmic2	GRK3
4.88344e-98	0.434177	0.319	0.219	1.63781e-93	Ast_protoplasmic2	LINC00499
3.33911e-105	0.432779	0.347	0.247	1.11987e-100	Ast_protoplasmic2	SNAP25
6.05854e-169	0.432622	0.14	0.058	2.03191e-164	Ast_protoplasmic2	PAK3
7.54253e-170	0.432491	0.208	0.106	2.52961e-165	Ast_protoplasmic2	GAS7
3.32587e-150	0.429333	0.614	0.492	1.11543e-145	Ast_protoplasmic2	SHROOM3
1.73236e-215	0.428902	0.452	0.286	5.80998e-211	Ast_protoplasmic2	DGKI
1.02011e-158	0.427373	0.594	0.469	3.42125e-154	Ast_protoplasmic2	ETNPPL
4.21424e-238	0.425454	0.778	0.663	1.41337e-233	Ast_protoplasmic2	CARMIL1
8.81406e-132	0.422044	0.54	0.426	2.95606e-127	Ast_protoplasmic2	KIAA1211
1.29841e-112	0.420426	0.244	0.153	4.35462e-108	Ast_protoplasmic2	DLGAP2
2.40958e-267	0.413443	0.788	0.603	8.08126e-263	Ast_protoplasmic2	SLC6A11
8.0584e-133	0.408608	0.564	0.446	2.70263e-128	Ast_protoplasmic2	TTYH1
1.10849e-103	0.406668	0.521	0.419	3.71765e-99	Ast_protoplasmic2	APOE
6.37598e-196	0.403716	0.746	0.639	2.13838e-191	Ast_protoplasmic2	MCC
3.92868e-157	0.392398	0.64	0.515	1.3176e-152	Ast_protoplasmic2	OTUD7A
1.06235e-187	0.39043	0.774	0.657	3.56291e-183	Ast_protoplasmic2	PDE7B
1.3996e-199	0.389818	0.82	0.73	4.69397e-195	Ast_protoplasmic2	KCNN3
2.13672e-116	0.389468	0.474	0.357	7.16614e-112	Ast_protoplasmic2	FSTL5
8.77503e-104	0.383893	0.403	0.3	2.94297e-99	Ast_protoplasmic2	ME1
4.09841e-98	0.382493	0.497	0.394	1.37452e-93	Ast_protoplasmic2	PLXNA2
2.64578e-100	0.380194	0.289	0.196	8.87342e-96	Ast_protoplasmic2	RIPOR2
2.48738e-148	0.377834	0.733	0.621	8.34219e-144	Ast_protoplasmic2	ACSBG1
5.87807e-195	0.375861	0.798	0.697	1.97139e-190	Ast_protoplasmic2	NHSL1
8.90947e-82	0.370439	0.184	0.114	2.98806e-77	Ast_protoplasmic2	FOXP2
1.20116e-110	0.36809	0.569	0.466	4.02844e-106	Ast_protoplasmic2	ALCAM
2.07362e-195	0.367684	0.816	0.714	6.9545e-191	Ast_protoplasmic2	RGS7
2.82026e-97	0.365706	0.261	0.173	9.45858e-93	Ast_protoplasmic2	MAP2K1
1.59094e-145	0.36407	0.715	0.617	5.33569e-141	Ast_protoplasmic2	SGIP1
6.0709e-157	0.363102	0.811	0.719	2.03606e-152	Ast_protoplasmic2	C1orf61
3.71806e-104	0.361094	0.325	0.223	1.24696e-99	Ast_protoplasmic2	SEMA3E
1.15161e-103	0.36016	0.261	0.168	3.86228e-99	Ast_protoplasmic2	KCNJ16
4.58979e-109	0.356277	0.487	0.38	1.53932e-104	Ast_protoplasmic2	CHKA
3.18545e-77	0.356247	0.377	0.286	1.06834e-72	Ast_protoplasmic2	PEBP4
4.04662e-106	0.35475	0.477	0.366	1.35715e-101	Ast_protoplasmic2	C2orf72
1.01006e-78	0.354269	0.432	0.341	3.38755e-74	Ast_protoplasmic2	KCNIP1
1.8659e-111	0.353846	0.402	0.29	6.25786e-107	Ast_protoplasmic2	RETREG1
3.52503e-172	0.353793	0.815	0.716	1.18222e-167	Ast_protoplasmic2	SPON1
8.65875e-159	0.353213	0.769	0.687	2.90397e-154	Ast_protoplasmic2	FARP1
2.6066e-98	0.351594	0.414	0.312	8.74202e-94	Ast_protoplasmic2	ABHD2
0	0.35121	0.95	0.819	0	Ast_protoplasmic2	SLC1A2
1.96549e-113	0.35104	0.616	0.515	6.59187e-109	Ast_protoplasmic2	LAMA1
1.01351e-108	0.349612	0.16	0.086	3.3991e-104	Ast_protoplasmic2	MFGE8
6.56638e-196	0.34631	0.857	0.746	2.20223e-191	Ast_protoplasmic2	KCND2
4.72579e-92	0.343273	0.466	0.365	1.58493e-87	Ast_protoplasmic2	TOX
4.52829e-129	0.342498	0.653	0.538	1.5187e-124	Ast_protoplasmic2	FGD4
1.43743e-87	0.341506	0.257	0.173	4.82084e-83	Ast_protoplasmic2	NKAIN4
1.94402e-72	0.341193	0.231	0.157	6.51984e-68	Ast_protoplasmic2	SLC24A3
5.71809e-104	0.340175	0.6	0.492	1.91773e-99	Ast_protoplasmic2	SPOCK1
7.56146e-186	0.339927	0.867	0.808	2.53596e-181	Ast_protoplasmic2	FMNL2
0	0.335079	0.991	0.977	0	Ast_protoplasmic2	LRP1B
2.72768e-128	0.33413	0.761	0.689	9.14808e-124	Ast_protoplasmic2	CADM1
1.89405e-295	0.33385	0.966	0.936	6.35226e-291	Ast_protoplasmic2	ERBB4
3.86709e-113	0.333468	0.729	0.637	1.29694e-108	Ast_protoplasmic2	TENM2
8.4241e-155	0.332273	0.87	0.798	2.82528e-150	Ast_protoplasmic2	LHFPL6
4.70839e-81	0.330634	0.313	0.225	1.5791e-76	Ast_protoplasmic2	NCAN
6.3066e-155	0.330602	0.864	0.784	2.11511e-150	Ast_protoplasmic2	TNC
9.6115e-149	0.328972	0.835	0.747	3.2235e-144	Ast_protoplasmic2	SLC4A4
9.77581e-52	0.328267	0.212	0.152	3.27861e-47	Ast_protoplasmic2	UNC5D
2.08485e-79	0.328053	0.494	0.404	6.99218e-75	Ast_protoplasmic2	AC124854.1
5.81724e-79	0.326659	0.545	0.454	1.95099e-74	Ast_protoplasmic2	NDRG2
2.38513e-116	0.325781	0.702	0.62	7.99926e-112	Ast_protoplasmic2	PHLPP1
1.81998e-84	0.325391	0.28	0.194	6.10384e-80	Ast_protoplasmic2	RBMS1
3.17921e-76	0.32534	0.301	0.219	1.06624e-71	Ast_protoplasmic2	MEIS1
7.83296e-88	0.323933	0.553	0.456	2.62702e-83	Ast_protoplasmic2	FGFR3
3.21961e-50	0.323	0.432	0.357	1.07979e-45	Ast_protoplasmic2	GPR158
5.31576e-87	0.322118	0.146	0.082	1.7828e-82	Ast_protoplasmic2	AL033504.1
0	0.321677	0.99	0.974	0	Ast_protoplasmic2	TRPM3
1.18059e-91	0.317267	0.548	0.445	3.95946e-87	Ast_protoplasmic2	BRINP3
4.48481e-50	0.314486	0.559	0.492	1.50412e-45	Ast_protoplasmic2	AC002429.2
1.52465e-70	0.314293	0.433	0.35	5.11339e-66	Ast_protoplasmic2	CADPS2
9.00003e-143	0.314184	0.835	0.76	3.01843e-138	Ast_protoplasmic2	BCL2
3.8358e-77	0.313673	0.555	0.471	1.28645e-72	Ast_protoplasmic2	PPM1L
4.13982e-153	0.313416	0.864	0.805	1.38841e-148	Ast_protoplasmic2	MGAT4C
1.76472e-81	0.312511	0.456	0.365	5.91852e-77	Ast_protoplasmic2	ATP1B2
4.37819e-253	0.31201	0.963	0.869	1.46836e-248	Ast_protoplasmic2	NRXN1
9.17552e-159	0.311834	0.898	0.846	3.07729e-154	Ast_protoplasmic2	KALRN
3.38937e-55	0.310452	0.292	0.222	1.13673e-50	Ast_protoplasmic2	ELMOD1
2.50814e-72	0.310411	0.389	0.303	8.41179e-68	Ast_protoplasmic2	SEC14L1
1.38906e-138	0.309725	0.809	0.728	4.65862e-134	Ast_protoplasmic2	ATP1A2
2.20506e-166	0.307204	0.917	0.874	7.39533e-162	Ast_protoplasmic2	NTRK2
1.23773e-62	0.306616	0.417	0.336	4.1511e-58	Ast_protoplasmic2	KCTD8
7.54645e-69	0.306552	0.178	0.114	2.53093e-64	Ast_protoplasmic2	KCNQ1OT1
4.33518e-62	0.30502	0.413	0.335	1.45393e-57	Ast_protoplasmic2	NEDD4L
1.93846e-53	0.302949	0.2	0.14	6.50122e-49	Ast_protoplasmic2	EBF1
3.64406e-46	0.302384	0.36	0.293	1.22215e-41	Ast_protoplasmic2	SHANK2
3.41297e-72	0.301797	0.694	0.623	1.14464e-67	Ast_protoplasmic2	TRIM9
1.98844e-71	0.29992	0.272	0.195	6.66884e-67	Ast_protoplasmic2	TTPA
1.67544e-67	0.298702	0.389	0.305	5.6191e-63	Ast_protoplasmic2	PCDH17
2.20378e-65	0.298201	0.111	0.062	7.39104e-61	Ast_protoplasmic2	AL450332.1
6.64817e-86	0.296433	0.187	0.114	2.22966e-81	Ast_protoplasmic2	ST6GAL2
3.60528e-68	0.29638	0.394	0.311	1.20914e-63	Ast_protoplasmic2	ENOSF1
0	0.295194	0.986	0.98	0	Ast_protoplasmic2	PPP2R2B
5.56408e-63	0.294633	0.34	0.263	1.86608e-58	Ast_protoplasmic2	AL645568.1
1.29281e-189	0.293714	0.925	0.882	4.33584e-185	Ast_protoplasmic2	ADGRL3
3.94331e-59	0.291796	0.342	0.266	1.32251e-54	Ast_protoplasmic2	TF
8.29319e-80	0.290826	0.159	0.094	2.78137e-75	Ast_protoplasmic2	WNT5B
2.90685e-67	0.289841	0.399	0.316	9.749e-63	Ast_protoplasmic2	GPD2
1.028e-90	0.289561	0.676	0.596	3.4477e-86	Ast_protoplasmic2	IQCA1
9.89858e-61	0.28902	0.321	0.245	3.31978e-56	Ast_protoplasmic2	SH3D19
4.85093e-100	0.288649	0.751	0.673	1.6269e-95	Ast_protoplasmic2	STARD13
3.5296e-82	0.288113	0.126	0.068	1.18376e-77	Ast_protoplasmic2	IGF2BP2
1.07817e-66	0.287932	0.196	0.131	3.61596e-62	Ast_protoplasmic2	PCTP
3.63686e-48	0.286877	0.326	0.258	1.21973e-43	Ast_protoplasmic2	LRRC3B
1.41711e-84	0.286638	0.752	0.683	4.75271e-80	Ast_protoplasmic2	SCD5
4.86118e-76	0.285995	0.562	0.473	1.63034e-71	Ast_protoplasmic2	LDLRAD3
3.08111e-76	0.284937	0.63	0.549	1.03334e-71	Ast_protoplasmic2	CECR2
4.34477e-50	0.284579	0.471	0.399	1.45715e-45	Ast_protoplasmic2	MRAS
3.39096e-69	0.28129	0.495	0.405	1.13726e-64	Ast_protoplasmic2	PID1
1.72969e-34	0.278949	0.257	0.205	5.80103e-30	Ast_protoplasmic2	SLC8A1
7.41501e-56	0.278814	0.416	0.334	2.48685e-51	Ast_protoplasmic2	SLC35F1
1.9712e-57	0.276417	0.264	0.194	6.611e-53	Ast_protoplasmic2	ENTPD1
3.15442e-92	0.275129	0.741	0.675	1.05793e-87	Ast_protoplasmic2	CHD9
2.67389e-57	0.27495	0.163	0.106	8.96769e-53	Ast_protoplasmic2	ATP10B
1.88665e-60	0.273031	0.481	0.401	6.32745e-56	Ast_protoplasmic2	CDH10
3.69911e-73	0.272213	0.735	0.663	1.24061e-68	Ast_protoplasmic2	LPIN1
5.86513e-60	0.271729	0.48	0.396	1.96705e-55	Ast_protoplasmic2	RORB
1.87516e-149	0.271364	0.939	0.899	6.28891e-145	Ast_protoplasmic2	CDH20
7.90567e-56	0.269522	0.176	0.118	2.65141e-51	Ast_protoplasmic2	TENT5A
4.21409e-81	0.267855	0.622	0.521	1.41332e-76	Ast_protoplasmic2	EGFR
2.89022e-51	0.267803	0.283	0.214	9.69321e-47	Ast_protoplasmic2	SGSM1
7.38753e-56	0.267753	0.316	0.243	2.47763e-51	Ast_protoplasmic2	APBB2
1.0522e-69	0.265638	0.638	0.568	3.52888e-65	Ast_protoplasmic2	GLUD1
1.7597e-53	0.264899	0.45	0.374	5.90168e-49	Ast_protoplasmic2	CPEB3
6.50449e-53	0.264452	0.221	0.159	2.18147e-48	Ast_protoplasmic2	CKMT2
6.1676e-52	0.263148	0.199	0.141	2.06849e-47	Ast_protoplasmic2	CC2D2B
1.74873e-42	0.262448	0.384	0.319	5.8649e-38	Ast_protoplasmic2	ARRB1
9.28108e-44	0.261687	0.296	0.234	3.11269e-39	Ast_protoplasmic2	IDH2
1.86395e-54	0.260828	0.51	0.437	6.25132e-50	Ast_protoplasmic2	DNAH7
6.80096e-97	0.259628	0.816	0.777	2.28091e-92	Ast_protoplasmic2	GPHN
1.42155e-54	0.258186	0.187	0.128	4.76759e-50	Ast_protoplasmic2	NID1
1.0463e-46	0.258053	0.239	0.178	3.50907e-42	Ast_protoplasmic2	GPR37L1
1.79047e-54	0.257783	0.44	0.363	6.00488e-50	Ast_protoplasmic2	STUM
4.29817e-48	0.25766	0.28	0.215	1.44152e-43	Ast_protoplasmic2	PDGFRB
7.33286e-63	0.256162	0.309	0.23	2.45929e-58	Ast_protoplasmic2	ABCD2
2.08227e-86	0.255976	0.13	0.07	6.98352e-82	Ast_protoplasmic2	STON1-GTF2A1L
2.7365e-49	0.255948	0.329	0.259	9.17767e-45	Ast_protoplasmic2	NAT8L
8.0855e-57	0.255873	0.202	0.139	2.71171e-52	Ast_protoplasmic2	IGDCC3
5.84413e-45	0.254575	0.331	0.264	1.96e-40	Ast_protoplasmic2	CTXND1
1.00332e-51	0.253367	0.293	0.224	3.36495e-47	Ast_protoplasmic2	C10orf90
3.90673e-45	0.251452	0.408	0.341	1.31024e-40	Ast_protoplasmic2	LMO3
4.3517e-61	0.250839	0.175	0.114	1.45947e-56	Ast_protoplasmic2	SLCO1A2
7.05877e-51	0.250546	0.45	0.374	2.36737e-46	Ast_protoplasmic2	RHBDL3
1.56341e-39	0.250028	0.177	0.128	5.24338e-35	Ast_protoplasmic2	COL23A1

## Sheet: Ast_fibrous1
p_val	avg_log2FC	pct.1	pct.2	p_val_adj	cluster	gene
0	1.27732	0.551	0.193	0	Ast_fibrous1	CPAMD8
0	1.27555	0.985	0.651	0	Ast_fibrous1	DPP10
0	1.16866	0.414	0.154	0	Ast_fibrous1	BTBD11
0	1.16763	0.57	0.198	0	Ast_fibrous1	ADAMTSL3
0	1.13813	0.669	0.369	0	Ast_fibrous1	TTN
0	0.923155	0.485	0.219	0	Ast_fibrous1	LINC00836
0	0.915859	0.863	0.591	0	Ast_fibrous1	DCLK1
0	0.907775	0.434	0.167	0	Ast_fibrous1	LINC00609
0	0.884088	0.706	0.433	0	Ast_fibrous1	NFASC
0	0.851761	0.505	0.247	0	Ast_fibrous1	VCAN
0	0.827897	0.563	0.338	0	Ast_fibrous1	CALN1
0	0.824792	0.728	0.417	0	Ast_fibrous1	CD44
0	0.818546	0.344	0.132	0	Ast_fibrous1	SIDT1
0	0.742586	0.568	0.334	0	Ast_fibrous1	DPYSL3
0	0.741422	0.409	0.185	0	Ast_fibrous1	GALNT15
0	0.721062	0.387	0.196	0	Ast_fibrous1	ABI3BP
0	0.720956	0.275	0.12	0	Ast_fibrous1	KSR2
0	0.719148	0.866	0.702	0	Ast_fibrous1	PLEKHA5
0	0.683702	0.503	0.281	0	Ast_fibrous1	STXBP5L
0	0.671823	0.461	0.275	0	Ast_fibrous1	RTN1
0	0.662506	0.429	0.166	0	Ast_fibrous1	SLC38A1
0	0.662115	0.493	0.31	0	Ast_fibrous1	SNED1
0	0.655077	0.477	0.268	0	Ast_fibrous1	CERS6
0	0.639051	0.715	0.514	0	Ast_fibrous1	TENM4
0	0.636894	0.45	0.248	0	Ast_fibrous1	MAN1C1
0	0.634192	0.221	0.079	0	Ast_fibrous1	PRR16
1.61883e-272	0.632108	0.539	0.391	5.42924e-268	Ast_fibrous1	FAM182B
0	0.616968	0.22	0.086	0	Ast_fibrous1	PLCXD3
1.3706e-57	0.616863	0.19	0.136	4.59673e-53	Ast_fibrous1	RASGEF1B
3.32035e-274	0.615802	0.3	0.159	1.11358e-269	Ast_fibrous1	CSMD2
0	0.609623	0.311	0.143	0	Ast_fibrous1	KCNJ3
0	0.604455	0.354	0.184	0	Ast_fibrous1	HS6ST3
0	0.598513	0.473	0.289	0	Ast_fibrous1	PLCE1
5.48688e-270	0.590607	0.472	0.316	1.84019e-265	Ast_fibrous1	ADAMTS9
8.61517e-177	0.587603	0.451	0.327	2.88936e-172	Ast_fibrous1	ROBO2
0	0.586922	0.693	0.547	0	Ast_fibrous1	MARCH3
7.31103e-210	0.565423	0.48	0.349	2.45197e-205	Ast_fibrous1	MAOB
1.67489e-282	0.563991	0.273	0.138	5.61726e-278	Ast_fibrous1	FAP
7.20918e-273	0.559002	0.307	0.164	2.41782e-268	Ast_fibrous1	PLCB4
2.3326e-223	0.558988	0.247	0.13	7.82306e-219	Ast_fibrous1	DYNC1I1
0	0.557677	0.921	0.85	0	Ast_fibrous1	KAZN
8.21665e-289	0.557385	0.408	0.243	2.7557e-284	Ast_fibrous1	AEBP1
1.67727e-293	0.552408	0.201	0.083	5.62524e-289	Ast_fibrous1	CA8
0	0.549764	0.33	0.171	0	Ast_fibrous1	KCNN2
0	0.549398	0.731	0.587	0	Ast_fibrous1	AC073941.1
2.27587e-255	0.547377	0.186	0.079	7.6328e-251	Ast_fibrous1	P3H2
4.50809e-262	0.54235	0.357	0.209	1.51192e-257	Ast_fibrous1	SMOC1
3.22693e-238	0.522369	0.389	0.245	1.08225e-233	Ast_fibrous1	AQP1
1.40323e-305	0.520756	0.405	0.234	4.70617e-301	Ast_fibrous1	SYNPO2
0	0.517669	0.34	0.153	0	Ast_fibrous1	CCDC85A
3.32254e-214	0.516301	0.315	0.189	1.11431e-209	Ast_fibrous1	KREMEN1
9.86757e-250	0.514315	0.24	0.118	3.30939e-245	Ast_fibrous1	LINC01515
2.03375e-266	0.507905	0.132	0.043	6.82078e-262	Ast_fibrous1	SORCS3
2.36916e-254	0.502933	0.423	0.269	7.94571e-250	Ast_fibrous1	COL21A1
2.3319e-268	0.499064	0.27	0.132	7.82072e-264	Ast_fibrous1	LRAT
0	0.495283	0.848	0.684	0	Ast_fibrous1	PRKG1
4.09685e-185	0.49069	0.204	0.105	1.374e-180	Ast_fibrous1	L3MBTL4
0	0.48959	0.908	0.778	0	Ast_fibrous1	GFAP
1.44561e-235	0.485268	0.245	0.122	4.84828e-231	Ast_fibrous1	C8orf34
0	0.48258	0.834	0.694	0	Ast_fibrous1	TSHZ2
2.14591e-260	0.481677	0.171	0.068	7.19694e-256	Ast_fibrous1	ID3
5.56344e-179	0.478548	0.441	0.318	1.86587e-174	Ast_fibrous1	WNK2
1.61354e-108	0.475704	0.416	0.334	5.41148e-104	Ast_fibrous1	UNC80
1.30328e-161	0.474413	0.378	0.264	4.37094e-157	Ast_fibrous1	AHNAK
2.24174e-296	0.469708	0.523	0.344	7.51833e-292	Ast_fibrous1	NRXN3
8.09203e-107	0.469546	0.39	0.295	2.71391e-102	Ast_fibrous1	DGKI
4.4104e-73	0.468897	0.476	0.404	1.47916e-68	Ast_fibrous1	MT2A
2.84359e-202	0.467561	0.43	0.294	9.53684e-198	Ast_fibrous1	MYLK
2.3125e-175	0.466835	0.263	0.154	7.75565e-171	Ast_fibrous1	SCN1A
1.17014e-244	0.464916	0.257	0.131	3.92443e-240	Ast_fibrous1	SMAD9
2.17622e-251	0.461814	0.917	0.873	7.29859e-247	Ast_fibrous1	GLIS3
1.69968e-130	0.461251	0.28	0.183	5.70038e-126	Ast_fibrous1	CHST9
1.93641e-175	0.458904	0.381	0.254	6.49434e-171	Ast_fibrous1	DOCK10
4.08301e-224	0.456822	0.313	0.179	1.36936e-219	Ast_fibrous1	SLCO3A1
2.77907e-209	0.456295	0.341	0.206	9.32045e-205	Ast_fibrous1	TPD52L1
5.52578e-164	0.45494	0.138	0.062	1.85324e-159	Ast_fibrous1	KCNAB1
1.16433e-175	0.449631	0.27	0.159	3.90492e-171	Ast_fibrous1	CRISPLD1
1.27685e-133	0.448051	0.534	0.417	4.28228e-129	Ast_fibrous1	CADPS
3.38241e-186	0.444621	0.511	0.382	1.13439e-181	Ast_fibrous1	PTPRG
2.35662e-175	0.443152	0.19	0.096	7.90363e-171	Ast_fibrous1	RHPN1
1.5226e-185	0.440758	0.643	0.534	5.1065e-181	Ast_fibrous1	NAV1
2.99363e-236	0.440631	0.807	0.726	1.004e-231	Ast_fibrous1	DAAM2
4.84496e-94	0.439504	0.184	0.114	1.6249e-89	Ast_fibrous1	ACTN1
7.76663e-204	0.438764	0.501	0.363	2.60477e-199	Ast_fibrous1	DAAM1
1.80895e-197	0.436733	0.612	0.478	6.06687e-193	Ast_fibrous1	DLGAP1
6.84929e-204	0.435739	0.637	0.523	2.29712e-199	Ast_fibrous1	KANK1
1.26759e-246	0.434575	0.633	0.477	4.25123e-242	Ast_fibrous1	MIR4300HG
1.8888e-176	0.432956	0.213	0.113	6.33467e-172	Ast_fibrous1	LMNTD1
0	0.432819	0.931	0.886	0	Ast_fibrous1	DCLK2
2.63395e-166	0.431308	0.341	0.224	8.83376e-162	Ast_fibrous1	GYG2
6.50602e-178	0.426301	0.634	0.532	2.18199e-173	Ast_fibrous1	ANTXR1
2.06658e-92	0.419179	0.136	0.077	6.93089e-88	Ast_fibrous1	SORCS1
3.83985e-165	0.418764	0.597	0.484	1.28781e-160	Ast_fibrous1	DNER
4.03281e-239	0.417561	0.138	0.049	1.35252e-234	Ast_fibrous1	CYP4F3
1.31524e-125	0.415767	0.177	0.098	4.41105e-121	Ast_fibrous1	C3
1.10148e-125	0.414234	0.596	0.503	3.69414e-121	Ast_fibrous1	AQP4-AS1
8.26547e-139	0.414026	0.364	0.259	2.77207e-134	Ast_fibrous1	SLC16A9
3.84065e-90	0.410707	0.485	0.403	1.28808e-85	Ast_fibrous1	ADAMTS9-AS2
1.33342e-158	0.410461	0.638	0.547	4.47203e-154	Ast_fibrous1	CASK
9.59214e-114	0.393522	0.383	0.287	3.21701e-109	Ast_fibrous1	FAM135B
3.39144e-111	0.392922	0.191	0.116	1.13742e-106	Ast_fibrous1	SNORC
1.64406e-170	0.391842	0.145	0.065	5.51385e-166	Ast_fibrous1	EMID1
6.76229e-181	0.391716	0.448	0.307	2.26794e-176	Ast_fibrous1	ARHGEF3
4.69059e-136	0.391701	0.303	0.2	1.57313e-131	Ast_fibrous1	DCHS2
8.27308e-118	0.391244	0.188	0.11	2.77463e-113	Ast_fibrous1	LAMA2
5.65076e-102	0.390262	0.227	0.149	1.89515e-97	Ast_fibrous1	FAM107A
2.59375e-107	0.388397	0.267	0.18	8.69893e-103	Ast_fibrous1	MAML3
7.00895e-114	0.388297	0.271	0.182	2.35066e-109	Ast_fibrous1	RGS9
1.43848e-121	0.385478	0.214	0.13	4.82437e-117	Ast_fibrous1	ELN
6.71412e-235	0.382096	0.845	0.779	2.25178e-230	Ast_fibrous1	FBXL7
6.85611e-231	0.381567	0.132	0.047	2.2994e-226	Ast_fibrous1	TMEM132E
2.53329e-118	0.380661	0.721	0.659	8.49614e-114	Ast_fibrous1	SLC14A1
3.50726e-132	0.376314	0.467	0.359	1.17627e-127	Ast_fibrous1	ITGB4
1.97352e-96	0.375394	0.447	0.354	6.61879e-92	Ast_fibrous1	GPC6
4.76382e-130	0.370199	0.244	0.151	1.59769e-125	Ast_fibrous1	CDH4
2.17497e-116	0.369931	0.265	0.174	7.29443e-112	Ast_fibrous1	MYO16
7.03146e-129	0.369671	0.382	0.27	2.35821e-124	Ast_fibrous1	GALNT13
1.20318e-108	0.36966	0.445	0.348	4.03524e-104	Ast_fibrous1	LTBP1
6.34237e-140	0.368998	0.623	0.525	2.1271e-135	Ast_fibrous1	SLC24A4
1.80375e-107	0.367794	0.238	0.154	6.04942e-103	Ast_fibrous1	TUBA1A
3.18317e-140	0.363294	0.22	0.128	1.06757e-135	Ast_fibrous1	FRMPD3
4.12196e-129	0.362859	0.599	0.508	1.38242e-124	Ast_fibrous1	DAPK1
6.67636e-88	0.361929	0.321	0.238	2.23912e-83	Ast_fibrous1	PLXNA4
1.69931e-119	0.360488	0.502	0.401	5.69914e-115	Ast_fibrous1	GRIK4
3.30381e-100	0.354343	0.391	0.3	1.10803e-95	Ast_fibrous1	TNS1
5.0059e-102	0.353911	0.327	0.237	1.67888e-97	Ast_fibrous1	PLEC
5.49691e-194	0.352227	0.141	0.058	1.84355e-189	Ast_fibrous1	APLNR
6.35126e-89	0.350522	0.113	0.06	2.13008e-84	Ast_fibrous1	IGFBP5
1.22089e-84	0.349994	0.446	0.361	4.09463e-80	Ast_fibrous1	IGFBP7
2.14183e-104	0.346709	0.244	0.16	7.18326e-100	Ast_fibrous1	ANGPT1
7.72112e-98	0.346642	0.207	0.132	2.58951e-93	Ast_fibrous1	AL365259.1
2.91919e-132	0.34607	0.287	0.186	9.79039e-128	Ast_fibrous1	ABCC4
2.89723e-133	0.34282	0.691	0.601	9.71674e-129	Ast_fibrous1	ABR
2.7286e-269	0.34148	0.92	0.835	9.15117e-265	Ast_fibrous1	LINC01088
1.52863e-99	0.339738	0.551	0.464	5.12671e-95	Ast_fibrous1	CAMK1D
5.54143e-110	0.339583	0.249	0.162	1.85849e-105	Ast_fibrous1	ARHGAP10
2.15588e-91	0.33878	0.336	0.249	7.23039e-87	Ast_fibrous1	GRIK3
1.07036e-79	0.338127	0.403	0.325	3.58979e-75	Ast_fibrous1	WDR11-AS1
4.05653e-81	0.337444	0.374	0.291	1.36048e-76	Ast_fibrous1	RETREG1
3.5151e-38	0.336349	0.116	0.079	1.17889e-33	Ast_fibrous1	AC092131.1
1.76232e-142	0.334837	0.149	0.073	5.91046e-138	Ast_fibrous1	AC009654.1
1.28265e-121	0.334054	0.182	0.104	4.30176e-117	Ast_fibrous1	EXPH5
1.36701e-114	0.333734	0.151	0.081	4.58468e-110	Ast_fibrous1	RERGL
2.6473e-67	0.333712	0.368	0.295	8.87851e-63	Ast_fibrous1	TIAM1
3.85175e-116	0.331593	0.646	0.564	1.2918e-111	Ast_fibrous1	NPAS2
3.23909e-198	0.329713	0.852	0.794	1.08633e-193	Ast_fibrous1	ABLIM1
5.58664e-135	0.329426	0.601	0.499	1.87365e-130	Ast_fibrous1	PPP1R12B
1.10901e-84	0.32877	0.241	0.165	3.71939e-80	Ast_fibrous1	PVT1
1.0912e-87	0.326008	0.279	0.2	3.65966e-83	Ast_fibrous1	CLTCL1
6.29691e-85	0.325925	0.245	0.169	2.11186e-80	Ast_fibrous1	DIRC3
2.07813e-273	0.325819	0.931	0.897	6.96962e-269	Ast_fibrous1	ADCY2
3.71489e-102	0.325325	0.153	0.087	1.2459e-97	Ast_fibrous1	USH1C
2.49223e-106	0.323748	0.32	0.226	8.35844e-102	Ast_fibrous1	NOS1AP
3.27852e-138	0.323451	0.136	0.065	1.09955e-133	Ast_fibrous1	CCDC141
4.56965e-156	0.32338	0.791	0.738	1.53257e-151	Ast_fibrous1	UTRN
9.91398e-95	0.323096	0.493	0.401	3.32495e-90	Ast_fibrous1	ZBTB7C
1.71986e-89	0.323071	0.275	0.195	5.76808e-85	Ast_fibrous1	CD99
1.04089e-126	0.320952	0.216	0.128	3.49094e-122	Ast_fibrous1	MYRIP
3.68612e-103	0.320503	0.116	0.058	1.23625e-98	Ast_fibrous1	CYP4F12
5.04083e-162	0.317151	0.872	0.83	1.6906e-157	Ast_fibrous1	RFX4
1.09583e-66	0.316693	0.107	0.062	3.6752e-62	Ast_fibrous1	HRH1
4.46682e-128	0.316039	0.777	0.72	1.49808e-123	Ast_fibrous1	ARHGEF4
1.1498e-75	0.313206	0.295	0.221	3.85621e-71	Ast_fibrous1	PRTG
1.62293e-78	0.311329	0.394	0.31	5.44298e-74	Ast_fibrous1	ADRA1A
1.12039e-127	0.310601	0.114	0.051	3.75755e-123	Ast_fibrous1	CP
7.90908e-102	0.310468	0.584	0.501	2.65255e-97	Ast_fibrous1	HYDIN
1.31986e-215	0.310258	0.509	0.36	4.42653e-211	Ast_fibrous1	LINC01094
0	0.308253	0.976	0.953	0	Ast_fibrous1	SORBS1
1.40613e-79	0.308089	0.285	0.205	4.71589e-75	Ast_fibrous1	DSCAM
6.60423e-94	0.307491	0.641	0.573	2.21493e-89	Ast_fibrous1	BCKDHB
2.82002e-85	0.306519	0.43	0.342	9.45778e-81	Ast_fibrous1	MOB3B
2.34441e-110	0.306158	0.118	0.058	7.8627e-106	Ast_fibrous1	ARHGAP6
6.38863e-263	0.305421	0.965	0.949	2.14262e-258	Ast_fibrous1	NAV2
5.48682e-56	0.304561	0.475	0.413	1.84017e-51	Ast_fibrous1	GINS3
4.98216e-60	0.302469	0.466	0.392	1.67092e-55	Ast_fibrous1	TPST1
1.788e-107	0.302371	0.702	0.634	5.99659e-103	Ast_fibrous1	MAPT
7.9531e-103	0.301711	0.14	0.076	2.66731e-98	Ast_fibrous1	CLVS1
3.44065e-95	0.300185	0.168	0.101	1.15392e-90	Ast_fibrous1	GRIA3
8.8773e-102	0.299519	0.111	0.055	2.97727e-97	Ast_fibrous1	AL603840.1
8.60926e-143	0.298951	0.102	0.041	2.88737e-138	Ast_fibrous1	GLYATL2
2.18465e-75	0.298701	0.481	0.403	7.32687e-71	Ast_fibrous1	ATP9A
3.22956e-120	0.298506	0.12	0.058	1.08313e-115	Ast_fibrous1	AC097658.2
1.0839e-104	0.296896	0.66	0.587	3.63518e-100	Ast_fibrous1	GAREM1
5.60513e-167	0.296221	0.417	0.284	1.87985e-162	Ast_fibrous1	HSPB8
6.70718e-96	0.295812	0.643	0.573	2.24945e-91	Ast_fibrous1	BICD1
2.84776e-203	0.295789	0.35	0.208	9.55081e-199	Ast_fibrous1	ST6GAL1
6.90926e-89	0.293931	0.102	0.052	2.31723e-84	Ast_fibrous1	S100A1
1.18275e-101	0.293757	0.734	0.686	3.96671e-97	Ast_fibrous1	AQP4
3.78924e-35	0.29255	0.326	0.274	1.27084e-30	Ast_fibrous1	ANGPTL4
4.64467e-97	0.292472	0.159	0.093	1.55773e-92	Ast_fibrous1	RPL11
9.74196e-113	0.292468	0.713	0.653	3.26726e-108	Ast_fibrous1	SLC9A9
9.34939e-71	0.29199	0.254	0.185	3.1356e-66	Ast_fibrous1	ZNF273
1.9979e-98	0.291249	0.624	0.54	6.70057e-94	Ast_fibrous1	DPYSL2
5.542e-83	0.291122	0.274	0.197	1.85868e-78	Ast_fibrous1	SLC22A15
3.84734e-92	0.290428	0.116	0.061	1.29032e-87	Ast_fibrous1	COL8A1
1.53532e-92	0.286674	0.123	0.066	5.14916e-88	Ast_fibrous1	AC008991.1
1.17845e-63	0.284498	0.417	0.343	3.95229e-59	Ast_fibrous1	ZNF704
6.12092e-55	0.282084	0.489	0.417	2.05283e-50	Ast_fibrous1	PPFIA2
1.4954e-59	0.280522	0.377	0.308	5.01528e-55	Ast_fibrous1	SLC16A1-AS1
9.21407e-128	0.279943	0.221	0.13	3.09021e-123	Ast_fibrous1	CFAP47
4.99203e-67	0.274081	0.546	0.472	1.67423e-62	Ast_fibrous1	PDZRN3
2.63543e-79	0.273016	0.135	0.079	8.83869e-75	Ast_fibrous1	RPLP1
1.34887e-78	0.272945	0.131	0.076	4.52383e-74	Ast_fibrous1	ALPK1
4.21231e-102	0.272738	0.85	0.782	1.41273e-97	Ast_fibrous1	TNC
2.87272e-58	0.271251	0.226	0.165	9.63452e-54	Ast_fibrous1	GFPT2
3.54235e-61	0.269428	0.13	0.081	1.18803e-56	Ast_fibrous1	LINC01725
7.41513e-73	0.269037	0.147	0.091	2.48689e-68	Ast_fibrous1	MAMDC2-AS1
7.56487e-47	0.268542	0.377	0.316	2.53711e-42	Ast_fibrous1	GHR
1.59097e-40	0.266973	0.258	0.208	5.33579e-36	Ast_fibrous1	S100B
1.58682e-90	0.266536	0.152	0.088	5.32186e-86	Ast_fibrous1	CNTN3
2.65582e-68	0.266268	0.134	0.082	8.90709e-64	Ast_fibrous1	PLXNC1
4.05556e-95	0.264924	0.115	0.059	1.36015e-90	Ast_fibrous1	RASGEF1A
4.42216e-58	0.264638	0.546	0.488	1.4831e-53	Ast_fibrous1	TRIM2
2.70773e-79	0.263963	0.272	0.194	9.08119e-75	Ast_fibrous1	CTNNA3
2.35587e-73	0.263443	0.598	0.52	7.90112e-69	Ast_fibrous1	GALNT18
7.82489e-69	0.263135	0.18	0.119	2.62431e-64	Ast_fibrous1	PLPP4
9.03342e-49	0.263082	0.298	0.236	3.02963e-44	Ast_fibrous1	CLIP2
4.00986e-58	0.26303	0.487	0.421	1.34483e-53	Ast_fibrous1	SPTAN1
2.54746e-88	0.261778	0.12	0.064	8.54368e-84	Ast_fibrous1	MYO5C
3.4461e-42	0.261769	0.245	0.192	1.15575e-37	Ast_fibrous1	AC019068.1
1.0699e-64	0.261234	0.157	0.102	3.58824e-60	Ast_fibrous1	INPP5D
6.68327e-56	0.260605	0.373	0.307	2.24143e-51	Ast_fibrous1	CAST
4.75861e-82	0.259469	0.109	0.059	1.59594e-77	Ast_fibrous1	HK2
7.86025e-37	0.259299	0.603	0.561	2.63617e-32	Ast_fibrous1	TNR
3.24569e-86	0.258904	0.655	0.591	1.08854e-81	Ast_fibrous1	MAP7
4.91169e-85	0.258561	0.202	0.13	1.64728e-80	Ast_fibrous1	ATRNL1
1.7264e-71	0.258449	0.17	0.111	5.79e-67	Ast_fibrous1	OSGIN2
1.09553e-55	0.258394	0.606	0.549	3.67418e-51	Ast_fibrous1	CACNA1C
7.37309e-73	0.256661	0.131	0.078	2.47279e-68	Ast_fibrous1	AC007563.2
3.08108e-61	0.255841	0.135	0.086	1.03333e-56	Ast_fibrous1	ITIH5
9.09158e-67	0.255111	0.219	0.154	3.04913e-62	Ast_fibrous1	ACTN2
1.96558e-66	0.253836	0.145	0.091	6.59217e-62	Ast_fibrous1	FBXL2
2.91306e-83	0.251538	0.119	0.066	9.76981e-79	Ast_fibrous1	TMOD1
2.1068e-195	0.251452	0.956	0.911	7.06579e-191	Ast_fibrous1	RYR3
1.62011e-45	0.251205	0.181	0.132	5.43354e-41	Ast_fibrous1	DISP3
6.81155e-46	0.251117	0.27	0.212	2.28446e-41	Ast_fibrous1	KIF6

## Sheet: Ast_fibrous2
p_val	avg_log2FC	pct.1	pct.2	p_val_adj	cluster	gene
0	2.83817	0.938	0.316	0	Ast_fibrous2	NRXN3
0	1.9903	0.636	0.144	0	Ast_fibrous2	CCDC85A
0	1.97808	0.683	0.27	0	Ast_fibrous2	HSPB8
0	1.87211	0.663	0.365	0	Ast_fibrous2	LINC01094
0	1.81221	0.621	0.186	0	Ast_fibrous2	SLC38A1
0	1.74988	0.579	0.279	0	Ast_fibrous2	PRKAG2
0	1.74858	0.694	0.314	0	Ast_fibrous2	ROBO2
0	1.7272	0.632	0.187	0	Ast_fibrous2	LINC00609
0	1.69557	0.468	0.112	0	Ast_fibrous2	C8orf34
0	1.67717	0.811	0.479	0	Ast_fibrous2	MIR4300HG
0	1.61711	0.997	0.71	0	Ast_fibrous2	DPP10
0	1.60776	0.599	0.198	0	Ast_fibrous2	ST6GAL1
0	1.60473	0.527	0.185	0	Ast_fibrous2	NLGN1
0	1.6033	0.511	0.174	0	Ast_fibrous2	CTNNA3
0	1.58749	0.473	0.137	0	Ast_fibrous2	CRYAB
0	1.51688	0.707	0.513	0	Ast_fibrous2	HSP90AA1
0	1.49029	0.506	0.123	0	Ast_fibrous2	LRAT
0	1.48356	0.401	0.07	0	Ast_fibrous2	TMEM163
0	1.44039	0.527	0.19	0	Ast_fibrous2	HS6ST3
0	1.37236	0.651	0.243	0	Ast_fibrous2	CPAMD8
0	1.35884	0.25	0.033	0	Ast_fibrous2	NR4A1
8.38158e-287	1.35519	0.403	0.222	2.81101e-282	Ast_fibrous2	SQSTM1
0	1.31826	0.629	0.257	0	Ast_fibrous2	ADAMTSL3
0	1.31767	0.581	0.253	0	Ast_fibrous2	UBC
1.19848e-213	1.29668	0.358	0.205	4.01948e-209	Ast_fibrous2	ELOVL5
0	1.28311	0.418	0.114	0	Ast_fibrous2	MYRIP
0	1.25654	0.249	0.086	0	Ast_fibrous2	LINC00907
0	1.24312	0.419	0.118	0	Ast_fibrous2	CFAP47
0	1.2427	0.486	0.178	0	Ast_fibrous2	SLCO3A1
0	1.24221	0.354	0.152	0	Ast_fibrous2	TUBA1A
0	1.23987	0.521	0.209	0	Ast_fibrous2	GALNT15
0	1.23973	0.49	0.232	0	Ast_fibrous2	HSPB1
0	1.23694	0.548	0.274	0	Ast_fibrous2	CFAP54
0	1.23	0.644	0.301	0	Ast_fibrous2	STXBP5L
0	1.19666	0.331	0.098	0	Ast_fibrous2	GRIN2A
0	1.19471	0.236	0.045	0	Ast_fibrous2	XKR4
0	1.18648	0.343	0.116	0	Ast_fibrous2	BAIAP2
2.8778e-78	1.17508	0.18	0.102	9.65155e-74	Ast_fibrous2	NAMPT
0	1.17046	0.4	0.114	0	Ast_fibrous2	ATRNL1
0	1.15921	0.483	0.191	0	Ast_fibrous2	DSCAM
0	1.14835	0.344	0.149	0	Ast_fibrous2	PFKFB2
0	1.13569	0.555	0.27	0	Ast_fibrous2	MAN1C1
0	1.10815	0.716	0.417	0	Ast_fibrous2	TTN
0	1.10724	0.635	0.403	0	Ast_fibrous2	FRMD5
0	1.08283	0.449	0.175	0	Ast_fibrous2	FOS
0	1.07635	0.89	0.637	0	Ast_fibrous2	DCLK1
0	1.07088	0.519	0.248	0	Ast_fibrous2	SYNPO2
0	1.0614	0.557	0.3	0	Ast_fibrous2	MYLK
0	1.05998	0.281	0.067	0	Ast_fibrous2	CLVS1
0	1.04584	0.439	0.184	0	Ast_fibrous2	KCNN2
0	1.03818	0.251	0.03	0	Ast_fibrous2	AC007221.2
0	1.03809	0.31	0.085	0	Ast_fibrous2	TRDN
0	1.0217	0.756	0.469	0	Ast_fibrous2	CD44
3.35895e-301	1.01715	0.554	0.353	1.12652e-296	Ast_fibrous2	WWTR1
0	1.00803	0.225	0.027	0	Ast_fibrous2	SLC47A2
0	1.00123	0.272	0.046	0	Ast_fibrous2	CYP4F12
0	1.0001	0.519	0.273	0	Ast_fibrous2	GRIP1
0	0.992896	0.542	0.267	0	Ast_fibrous2	GALNT13
0	0.99087	0.337	0.114	0	Ast_fibrous2	LMNTD1
1.23112e-264	0.980724	0.301	0.14	4.12892e-260	Ast_fibrous2	STOM
0	0.976335	0.909	0.725	0	Ast_fibrous2	PLEKHA5
0	0.97287	0.318	0.108	0	Ast_fibrous2	ARMC3
0	0.962061	0.52	0.283	0	Ast_fibrous2	COL21A1
0	0.942677	0.208	0.065	0	Ast_fibrous2	FBXO32
0	0.942337	0.248	0.09	0	Ast_fibrous2	HLA-E
0	0.936105	0.375	0.137	0	Ast_fibrous2	SMAD9
0	0.921904	0.253	0.07	0	Ast_fibrous2	ITGBL1
0	0.913806	0.292	0.091	0	Ast_fibrous2	FREM1
0	0.910109	0.351	0.137	0	Ast_fibrous2	VWA3A
0	0.901753	0.548	0.296	0	Ast_fibrous2	CERS6
0	0.897779	0.259	0.054	0	Ast_fibrous2	MYO5C
0	0.884153	0.98	0.951	0	Ast_fibrous2	NEAT1
0	0.882286	0.69	0.505	0	Ast_fibrous2	PPP1R12B
2.74395e-117	0.877952	0.399	0.276	9.20266e-113	Ast_fibrous2	ALK
0	0.874121	0.445	0.23	0	Ast_fibrous2	GYG2
0	0.869668	0.981	0.956	0	Ast_fibrous2	SORBS1
0	0.861121	0.858	0.759	0	Ast_fibrous2	CLU
0	0.858444	0.518	0.256	0	Ast_fibrous2	AEBP1
1.38586e-270	0.855977	0.31	0.142	4.64791e-266	Ast_fibrous2	CASC15
0	0.852984	0.59	0.375	0	Ast_fibrous2	DAAM1
0	0.847767	0.249	0.074	0	Ast_fibrous2	SPAG17
4.40219e-191	0.843457	0.525	0.377	1.47641e-186	Ast_fibrous2	CNN3
2.73303e-267	0.843137	0.364	0.181	9.16604e-263	Ast_fibrous2	RNF220
5.72219e-298	0.835181	0.226	0.079	1.91911e-293	Ast_fibrous2	SLC7A5
7.2999e-206	0.825577	0.254	0.117	2.44824e-201	Ast_fibrous2	SDK1
0	0.823155	0.546	0.312	0	Ast_fibrous2	PLCE1
2.56029e-118	0.807804	0.489	0.36	8.58669e-114	Ast_fibrous2	CLIC4
0	0.788501	0.225	0.06	0	Ast_fibrous2	LRRC9
2.18148e-287	0.787691	0.18	0.054	7.31626e-283	Ast_fibrous2	TTC6
0	0.787394	0.92	0.8	0	Ast_fibrous2	GFAP
0	0.787362	0.78	0.621	0	Ast_fibrous2	PSD3
7.66e-297	0.781404	0.433	0.227	2.56901e-292	Ast_fibrous2	NOS1AP
1.47398e-300	0.779044	0.233	0.082	4.94344e-296	Ast_fibrous2	RERGL
2.95491e-184	0.77885	0.203	0.087	9.91017e-180	Ast_fibrous2	IDI1
0	0.772645	0.222	0.056	0	Ast_fibrous2	CREB5
0	0.768614	0.189	0.04	0	Ast_fibrous2	EPB41L4A
5.53828e-207	0.765767	0.346	0.186	1.85743e-202	Ast_fibrous2	AL445250.1
2.2378e-302	0.765488	0.512	0.293	7.50513e-298	Ast_fibrous2	VCAN
0	0.76509	0.942	0.892	0	Ast_fibrous2	DCLK2
2.73121e-205	0.764115	0.251	0.115	9.15993e-201	Ast_fibrous2	MEF2D
1.65468e-180	0.763411	0.252	0.122	5.54947e-176	Ast_fibrous2	HSPH1
2.23849e-266	0.760797	0.332	0.155	7.50745e-262	Ast_fibrous2	CDH4
1.2815e-199	0.759266	0.19	0.075	4.29789e-195	Ast_fibrous2	INSIG1
1.15292e-216	0.759121	0.357	0.19	3.86667e-212	Ast_fibrous2	CHST9
3.00625e-210	0.753965	0.354	0.193	1.00824e-205	Ast_fibrous2	CFAP44
8.50494e-237	0.750019	0.366	0.193	2.85239e-232	Ast_fibrous2	ABCC4
5.92668e-279	0.749695	0.342	0.159	1.98769e-274	Ast_fibrous2	GFPT2
0	0.749477	0.232	0.075	0	Ast_fibrous2	SH3PXD2A
0	0.745341	0.699	0.484	0	Ast_fibrous2	NFASC
1.41565e-155	0.74392	0.252	0.131	4.74781e-151	Ast_fibrous2	PRUNE2
0	0.741413	0.103	0.017	0	Ast_fibrous2	NR4A3
2.58691e-219	0.741157	0.47	0.293	8.67599e-215	Ast_fibrous2	TIAM1
0	0.740239	0.881	0.709	0	Ast_fibrous2	PRKG1
7.42144e-186	0.739863	0.242	0.113	2.489e-181	Ast_fibrous2	PCAT1
1.08747e-250	0.737324	0.519	0.329	3.64715e-246	Ast_fibrous2	WNK2
3.02848e-162	0.732641	0.627	0.509	1.01569e-157	Ast_fibrous2	ZBTB16
1.33428e-255	0.732524	0.251	0.102	4.47489e-251	Ast_fibrous2	DNAH6
2.13073e-247	0.732261	0.674	0.515	7.14603e-243	Ast_fibrous2	DGKB
1.5577e-258	0.727099	0.646	0.476	5.22421e-254	Ast_fibrous2	SIPA1L1
1.01835e-126	0.726522	0.407	0.289	3.41534e-122	Ast_fibrous2	LINC00894
1.29271e-232	0.724534	0.425	0.246	4.33549e-228	Ast_fibrous2	C2CD2
2.06976e-197	0.723358	0.36	0.2	6.94155e-193	Ast_fibrous2	SEPT9
2.0385e-292	0.722178	0.268	0.103	6.83671e-288	Ast_fibrous2	PLCXD3
7.95803e-156	0.719991	0.345	0.205	2.66896e-151	Ast_fibrous2	GRIK2
3.57988e-145	0.719573	0.375	0.234	1.20062e-140	Ast_fibrous2	SMOC1
6.81467e-85	0.717701	0.471	0.374	2.2855e-80	Ast_fibrous2	MAOB
2.8662e-195	0.714332	0.484	0.32	9.61268e-191	Ast_fibrous2	ECE1
0	0.71408	0.199	0.05	0	Ast_fibrous2	CP
4.37719e-134	0.707344	0.238	0.126	1.46802e-129	Ast_fibrous2	LDLR
5.13442e-192	0.70529	0.254	0.119	1.72198e-187	Ast_fibrous2	SEMA3B
9.20061e-305	0.704643	0.206	0.065	3.0857e-300	Ast_fibrous2	AC008991.1
3.28241e-237	0.703865	0.563	0.377	1.10086e-232	Ast_fibrous2	DPYSL3
0	0.697851	0.234	0.07	0	Ast_fibrous2	TTLL7
1.56683e-212	0.693852	0.439	0.258	5.25482e-208	Ast_fibrous2	JUN
0	0.69315	0.15	0.031	0	Ast_fibrous2	KCNT2
3.38436e-136	0.691664	0.244	0.13	1.13505e-131	Ast_fibrous2	SCD
0	0.688458	0.184	0.04	0	Ast_fibrous2	GLYATL2
2.13417e-174	0.684645	0.27	0.138	7.15759e-170	Ast_fibrous2	PER1
0	0.684093	0.204	0.06	0	Ast_fibrous2	MYOF
1.39234e-287	0.683258	0.363	0.167	4.66962e-283	Ast_fibrous2	SIDT1
5.07796e-191	0.677966	0.503	0.325	1.70305e-186	Ast_fibrous2	ARHGEF3
1.02166e-186	0.672939	0.218	0.093	3.42643e-182	Ast_fibrous2	P3H2
4.02656e-167	0.67262	0.376	0.227	1.35043e-162	Ast_fibrous2	HSP90AB1
1.00292e-187	0.667995	0.276	0.136	3.3636e-183	Ast_fibrous2	ELN
7.00634e-195	0.666641	0.213	0.09	2.34979e-190	Ast_fibrous2	TPM4
1.4159e-149	0.665779	0.293	0.164	4.74865e-145	Ast_fibrous2	BHLHE40
1.51406e-62	0.661503	0.321	0.239	5.07785e-58	Ast_fibrous2	CDC42EP4
6.92618e-192	0.661406	0.108	0.029	2.3229e-187	Ast_fibrous2	CFAP299
0	0.660205	0.112	0.012	0	Ast_fibrous2	MAFF
1.218e-253	0.659804	0.475	0.269	4.08493e-249	Ast_fibrous2	LINC00836
8.15568e-201	0.658322	0.196	0.077	2.73525e-196	Ast_fibrous2	AC233296.1
0	0.657086	0.107	0.017	0	Ast_fibrous2	ATF3
5.17109e-174	0.653381	0.581	0.429	1.73428e-169	Ast_fibrous2	GSE1
1.26282e-111	0.65305	0.334	0.219	4.23524e-107	Ast_fibrous2	AC006059.1
2.1265e-180	0.652748	0.503	0.35	7.13187e-176	Ast_fibrous2	CCDC14
9.10572e-213	0.649772	0.136	0.041	3.05388e-208	Ast_fibrous2	AC016766.1
4.85729e-280	0.642727	0.743	0.547	1.62904e-275	Ast_fibrous2	TENM4
8.17924e-93	0.641517	0.347	0.24	2.74315e-88	Ast_fibrous2	PADI2
5.87663e-176	0.639741	0.473	0.314	1.97091e-171	Ast_fibrous2	ADRA1A
1.32477e-155	0.637076	0.567	0.435	4.44302e-151	Ast_fibrous2	DMD
1.41195e-122	0.636118	0.399	0.272	4.73539e-118	Ast_fibrous2	PACRG
1.7089e-53	0.633943	0.177	0.113	5.7313e-49	Ast_fibrous2	HMGCS1
1.8747e-148	0.63306	0.312	0.18	6.28737e-144	Ast_fibrous2	KIAA1549L
9.60136e-301	0.63134	0.181	0.052	3.2201e-296	Ast_fibrous2	KCNH8
1.52168e-214	0.630883	0.739	0.61	5.1034e-210	Ast_fibrous2	ABR
7.93154e-165	0.628899	0.441	0.286	2.66008e-160	Ast_fibrous2	MATN2
0	0.628765	0.225	0.072	0	Ast_fibrous2	SYNDIG1
1.98654e-300	0.627513	0.203	0.064	6.66245e-296	Ast_fibrous2	APLNR
5.8071e-176	0.626051	0.709	0.597	1.94758e-171	Ast_fibrous2	BCL6
2.11524e-223	0.625551	0.223	0.089	7.0941e-219	Ast_fibrous2	CNTN3
4.52977e-170	0.623122	0.255	0.126	1.51919e-165	Ast_fibrous2	MSN
0	0.622433	0.178	0.047	0	Ast_fibrous2	GALNT8
1.90827e-70	0.619717	0.393	0.306	6.39997e-66	Ast_fibrous2	SLC25A33
8.08875e-213	0.617884	0.195	0.074	2.71281e-208	Ast_fibrous2	CNKSR3
2.2942e-122	0.605691	0.366	0.241	7.69427e-118	Ast_fibrous2	VCL
3.94335e-123	0.60323	0.223	0.116	1.32252e-118	Ast_fibrous2	GEM
1.01724e-137	0.603082	0.152	0.064	3.41161e-133	Ast_fibrous2	MXD1
9.42287e-145	0.600694	0.258	0.137	3.16024e-140	Ast_fibrous2	LRRIQ1
5.56493e-266	0.600338	0.185	0.059	1.86637e-261	Ast_fibrous2	CYP4F3
1.77179e-230	0.595943	0.205	0.075	5.94224e-226	Ast_fibrous2	EPB41L3
3.14741e-65	0.593946	0.214	0.138	1.05558e-60	Ast_fibrous2	JDP2
0	0.592811	0.146	0.025	0	Ast_fibrous2	LINC02177
0	0.590832	0.112	0.011	0	Ast_fibrous2	LINC00639
0	0.58962	0.116	0.022	0	Ast_fibrous2	DNAH11
2.18432e-97	0.5881	0.37	0.259	7.32577e-93	Ast_fibrous2	GAPDH
1.39606e-151	0.588057	0.373	0.23	4.68209e-147	Ast_fibrous2	DGKD
1.38657e-140	0.587868	0.233	0.119	4.6503e-136	Ast_fibrous2	DNAH9
3.47245e-167	0.587264	0.697	0.596	1.16459e-162	Ast_fibrous2	MAP7
5.8299e-142	0.585142	0.378	0.236	1.95523e-137	Ast_fibrous2	CLIP2
9.95926e-116	0.579834	0.525	0.403	3.34014e-111	Ast_fibrous2	PTPRG
2.00564e-134	0.576984	0.236	0.124	6.72652e-130	Ast_fibrous2	CFAP43
3.30404e-160	0.573305	0.635	0.509	1.10811e-155	Ast_fibrous2	HYDIN
6.6734e-133	0.568514	0.595	0.474	2.23812e-128	Ast_fibrous2	CAMK1D
1.27486e-123	0.56786	0.597	0.489	4.27562e-119	Ast_fibrous2	C9orf3
8.85663e-306	0.567535	0.93	0.849	2.97034e-301	Ast_fibrous2	LINC01088
4.861e-111	0.566979	0.368	0.242	1.63028e-106	Ast_fibrous2	SYT1
1.32943e-158	0.565382	0.713	0.599	4.45866e-154	Ast_fibrous2	AGBL4
1.40611e-119	0.56314	0.542	0.425	4.71581e-115	Ast_fibrous2	SPTAN1
2.50748e-221	0.560013	0.196	0.072	8.40959e-217	Ast_fibrous2	EMID1
1.7755e-110	0.559721	0.454	0.334	5.95466e-106	Ast_fibrous2	NEK11
1.24554e-40	0.558691	0.144	0.093	4.17731e-36	Ast_fibrous2	MSMO1
7.80453e-168	0.558024	0.105	0.031	2.61748e-163	Ast_fibrous2	SERPINH1
1.10914e-136	0.557788	0.321	0.191	3.71983e-132	Ast_fibrous2	SPAG1
9.46597e-149	0.557362	0.655	0.541	3.1747e-144	Ast_fibrous2	KANK1
6.912e-88	0.556844	0.577	0.481	2.31815e-83	Ast_fibrous2	PDZRN3
6.40972e-103	0.555668	0.378	0.266	2.14969e-98	Ast_fibrous2	TLE4
2.27162e-107	0.55348	0.43	0.314	7.61857e-103	Ast_fibrous2	CFAP70
3.81682e-105	0.54748	0.377	0.26	1.28009e-100	Ast_fibrous2	RGS12
3.78064e-302	0.54465	0.162	0.042	1.26795e-297	Ast_fibrous2	GALNT3
6.74248e-142	0.544562	0.324	0.191	2.26129e-137	Ast_fibrous2	RGS9
0	0.541659	0.119	0.019	0	Ast_fibrous2	AC009435.1
5.54971e-92	0.541416	0.345	0.238	1.86126e-87	Ast_fibrous2	FTH1
8.95692e-56	0.540308	0.632	0.597	3.00397e-51	Ast_fibrous2	BMP2K
5.1897e-115	0.539308	0.424	0.299	1.74052e-110	Ast_fibrous2	INPP4A
2.78369e-110	0.53794	0.181	0.091	9.33593e-106	Ast_fibrous2	RIPK2
0	0.536042	0.128	0.016	0	Ast_fibrous2	AC007221.1
7.00571e-50	0.535909	0.366	0.295	2.34958e-45	Ast_fibrous2	PMP2
1.95525e-245	0.534831	0.153	0.045	6.55753e-241	Ast_fibrous2	AC090630.1
5.94672e-66	0.534756	0.18	0.108	1.99441e-61	Ast_fibrous2	EYA4
4.53988e-109	0.533083	0.548	0.438	1.52258e-104	Ast_fibrous2	AF117829.1
3.14605e-124	0.532188	0.572	0.456	1.05512e-119	Ast_fibrous2	SND1
1.6011e-56	0.530688	0.238	0.164	5.36977e-52	Ast_fibrous2	LRRC8A
2.08707e-82	0.529467	0.211	0.125	6.99962e-78	Ast_fibrous2	LMNA
1.31468e-178	0.528965	0.143	0.049	4.40918e-174	Ast_fibrous2	PCP4
9.21154e-298	0.52877	0.142	0.034	3.08937e-293	Ast_fibrous2	DRC1
2.70036e-90	0.528697	0.321	0.213	9.05648e-86	Ast_fibrous2	ARID5B
0	0.528336	0.123	0.013	0	Ast_fibrous2	LINC01902
5.45754e-129	0.527807	0.302	0.175	1.83035e-124	Ast_fibrous2	KCNJ3
1.37708e-97	0.527294	0.324	0.219	4.61844e-93	Ast_fibrous2	IFRD1
5.00859e-92	0.52725	0.167	0.087	1.67978e-87	Ast_fibrous2	HIST1H2AC
4.05289e-105	0.521761	0.191	0.1	1.35926e-100	Ast_fibrous2	MARCH1
1.42346e-132	0.519574	0.222	0.112	4.774e-128	Ast_fibrous2	EXPH5
0	0.517541	0.117	0.021	0	Ast_fibrous2	LINC01411
4.10527e-115	0.515799	0.324	0.202	1.37682e-110	Ast_fibrous2	CD99
1.58781e-88	0.512826	0.271	0.172	5.3252e-84	Ast_fibrous2	ANGPT1
2.80847e-240	0.511791	0.132	0.035	9.41906e-236	Ast_fibrous2	ZBBX
2.05154e-111	0.511692	0.27	0.157	6.88045e-107	Ast_fibrous2	GADD45B
6.95905e-126	0.510145	0.454	0.303	2.33392e-121	Ast_fibrous2	DGKI
1.14513e-79	0.509277	0.547	0.465	3.84055e-75	Ast_fibrous2	CRB1
1.30939e-116	0.508007	0.28	0.167	4.39144e-112	Ast_fibrous2	YWHAZ
6.21888e-94	0.506727	0.521	0.414	2.08569e-89	Ast_fibrous2	ZBTB7C
4.87137e-102	0.506526	0.263	0.158	1.63376e-97	Ast_fibrous2	MOB1B
4.01457e-91	0.505943	0.4	0.294	1.34641e-86	Ast_fibrous2	ANKRD28
1.67666e-104	0.505542	0.212	0.116	5.62319e-100	Ast_fibrous2	CXXC5
1.67959e-94	0.504448	0.47	0.347	5.63302e-90	Ast_fibrous2	SNED1
7.29493e-118	0.50289	0.204	0.105	2.44657e-113	Ast_fibrous2	CRY1
1.48881e-67	0.502324	0.183	0.11	4.99316e-63	Ast_fibrous2	HSPA5
7.48474e-104	0.501842	0.162	0.078	2.51023e-99	Ast_fibrous2	RFTN1
1.04789e-71	0.501697	0.541	0.463	3.51442e-67	Ast_fibrous2	SH3GL2
4.52319e-121	0.500642	0.226	0.119	1.51699e-116	Ast_fibrous2	SLC7A2
1.01743e-81	0.499479	0.661	0.597	3.41225e-77	Ast_fibrous2	RNF19A
5.59485e-159	0.498179	0.12	0.04	1.8764e-154	Ast_fibrous2	YOD1
2.65971e-151	0.496937	0.752	0.669	8.92013e-147	Ast_fibrous2	MED13L
5.05536e-109	0.493602	0.647	0.551	1.69547e-104	Ast_fibrous2	DPYSL2
1.03111e-54	0.493286	0.339	0.26	3.45815e-50	Ast_fibrous2	EZR
4.85105e-93	0.491748	0.193	0.106	1.62695e-88	Ast_fibrous2	IFFO2
1.21162e-76	0.490348	0.366	0.268	4.06354e-72	Ast_fibrous2	OLMALINC
4.49913e-147	0.489838	0.15	0.06	1.50892e-142	Ast_fibrous2	AL603840.1
3.04152e-90	0.4889	0.375	0.267	1.02006e-85	Ast_fibrous2	TTLL5
1.70512e-116	0.485377	0.18	0.087	5.71864e-112	Ast_fibrous2	CFAP46
5.22475e-59	0.485048	0.198	0.127	1.75228e-54	Ast_fibrous2	SLC43A2
7.3075e-266	0.484219	0.116	0.025	2.45079e-261	Ast_fibrous2	AC079298.3
1.77907e-97	0.483998	0.388	0.271	5.96663e-93	Ast_fibrous2	MICAL3
2.89807e-84	0.483441	0.278	0.178	9.71955e-80	Ast_fibrous2	CRISPLD1
9.44361e-130	0.480162	0.162	0.071	3.1672e-125	Ast_fibrous2	GSG1L
1.04131e-122	0.479978	0.253	0.139	3.49234e-118	Ast_fibrous2	LINC01515
6.59109e-100	0.478818	0.241	0.139	2.21052e-95	Ast_fibrous2	DNAJB1
2.63647e-66	0.478387	0.527	0.453	8.84219e-62	Ast_fibrous2	VGLL4
3.81254e-89	0.478203	0.385	0.275	1.27865e-84	Ast_fibrous2	SLC16A9
3.5874e-81	0.478081	0.2	0.117	1.20314e-76	Ast_fibrous2	OSGIN2
8.13198e-77	0.476595	0.223	0.137	2.7273e-72	Ast_fibrous2	NDEL1
2.33582e-95	0.469325	0.202	0.111	7.83387e-91	Ast_fibrous2	MMP16
3.2279e-135	0.468915	0.789	0.71	1.08257e-130	Ast_fibrous2	LMCD1-AS1
1.91998e-83	0.468509	0.456	0.351	6.43924e-79	Ast_fibrous2	ZNF704
7.67416e-236	0.468501	0.12	0.03	2.57376e-231	Ast_fibrous2	ARRDC4
2.77819e-81	0.467367	0.444	0.34	9.31749e-77	Ast_fibrous2	TANC1
1.83067e-78	0.465696	0.405	0.301	6.1397e-74	Ast_fibrous2	FAM135B
1.99589e-55	0.464165	0.124	0.068	6.69381e-51	Ast_fibrous2	IGFBP5
1.21482e-118	0.463478	0.154	0.069	4.07426e-114	Ast_fibrous2	KLF6
6.75155e-98	0.459525	0.491	0.369	2.26433e-93	Ast_fibrous2	PTPRD
2.22687e-80	0.455433	0.146	0.074	7.46847e-76	Ast_fibrous2	KCNAB1
5.83239e-98	0.455166	0.223	0.126	1.95607e-93	Ast_fibrous2	NT5DC3
1.01034e-117	0.454268	0.191	0.094	3.38849e-113	Ast_fibrous2	FBXL2
9.16637e-50	0.451624	0.372	0.299	3.07422e-45	Ast_fibrous2	ZFAND5
8.07316e-153	0.451538	0.188	0.082	2.70758e-148	Ast_fibrous2	TOX2
5.03166e-80	0.449388	0.157	0.082	1.68752e-75	Ast_fibrous2	ALPK1
1.41846e-134	0.44911	0.129	0.049	4.75722e-130	Ast_fibrous2	FABP5
7.9241e-85	0.448878	0.133	0.064	2.65759e-80	Ast_fibrous2	HK2
3.75546e-112	0.448315	0.196	0.1	1.25951e-107	Ast_fibrous2	KIF5C
1.02235e-51	0.448255	0.209	0.139	3.42876e-47	Ast_fibrous2	KYAT1
9.6485e-57	0.447382	0.581	0.526	3.23591e-52	Ast_fibrous2	FOXO1
1.20588e-150	0.447097	0.186	0.082	4.04427e-146	Ast_fibrous2	AC009654.1
1.92066e-64	0.446449	0.228	0.148	6.44151e-60	Ast_fibrous2	RPGR
3.52723e-74	0.445491	0.215	0.132	1.18296e-69	Ast_fibrous2	DCDC1
2.55075e-52	0.445136	0.492	0.401	8.55471e-48	Ast_fibrous2	TPST1
1.31595e-79	0.445003	0.243	0.152	4.41344e-75	Ast_fibrous2	MTCH1
4.38363e-115	0.444509	0.181	0.088	1.47018e-110	Ast_fibrous2	ITIH5
2.3905e-97	0.444362	0.2	0.109	8.01727e-93	Ast_fibrous2	MTURN
1.76302e-81	0.444231	0.896	0.884	5.91283e-77	Ast_fibrous2	GLIS3
6.81133e-72	0.443591	0.495	0.406	2.28438e-67	Ast_fibrous2	DNAJC1
1.32715e-93	0.44289	0.655	0.583	4.451e-89	Ast_fibrous2	BCKDHB
1.26904e-25	0.442695	0.116	0.078	4.2561e-21	Ast_fibrous2	HAS2
4.86154e-125	0.441127	0.147	0.062	1.63046e-120	Ast_fibrous2	ATP1A1
4.79927e-51	0.441037	0.233	0.162	1.60958e-46	Ast_fibrous2	H3F3B
1.18799e-63	0.440401	0.466	0.379	3.9843e-59	Ast_fibrous2	ITGB4
9.65957e-136	0.440223	0.103	0.034	3.23963e-131	Ast_fibrous2	PCDH11Y
4.88179e-106	0.43839	0.175	0.087	1.63726e-101	Ast_fibrous2	SLC38A2
1.30399e-107	0.437211	0.169	0.083	4.37331e-103	Ast_fibrous2	JHY
6.23598e-141	0.436223	0.156	0.064	2.09142e-136	Ast_fibrous2	ARHGAP6
2.90019e-09	0.436108	0.164	0.141	9.72666e-05	Ast_fibrous2	TIPARP
3.59414e-90	0.435067	0.615	0.522	1.2054e-85	Ast_fibrous2	DAPK1
1.66499e-89	0.433875	0.15	0.075	5.58406e-85	Ast_fibrous2	LCA5
2.2039e-73	0.431058	0.501	0.411	7.39144e-69	Ast_fibrous2	OSBPL9
7.64373e-63	0.430977	0.262	0.176	2.56355e-58	Ast_fibrous2	PVT1
2.36028e-48	0.430283	0.453	0.379	7.91592e-44	Ast_fibrous2	DPYD
8.03006e-78	0.42798	0.245	0.153	2.69312e-73	Ast_fibrous2	KSR2
3.57982e-53	0.427075	0.522	0.463	1.2006e-48	Ast_fibrous2	ZFP36L1
3.35192e-45	0.42698	0.709	0.687	1.12417e-40	Ast_fibrous2	ERBIN
4.60419e-113	0.425834	0.203	0.104	1.54415e-108	Ast_fibrous2	CA8
1.2511e-77	0.425721	0.593	0.513	4.19595e-73	Ast_fibrous2	HMBOX1
3.0935e-59	0.424559	0.574	0.51	1.0375e-54	Ast_fibrous2	TMEM178B
8.30637e-57	0.424489	0.538	0.468	2.78579e-52	Ast_fibrous2	GMPR
9.74725e-131	0.423161	0.171	0.076	3.26903e-126	Ast_fibrous2	DBI
5.90975e-65	0.420716	0.32	0.232	1.98201e-60	Ast_fibrous2	RHEB
1.3476e-61	0.420281	0.149	0.085	4.51958e-57	Ast_fibrous2	AC138123.1
1.14109e-155	0.420257	0.13	0.046	3.82697e-151	Ast_fibrous2	DAPK3
5.91963e-89	0.419498	0.218	0.126	1.98532e-84	Ast_fibrous2	B3GLCT
8.87254e-49	0.418884	0.678	0.661	2.97567e-44	Ast_fibrous2	PFKFB3
1.0116e-43	0.418195	0.193	0.128	3.39269e-39	Ast_fibrous2	EMP1
1.57078e-17	0.416884	0.308	0.268	5.26809e-13	Ast_fibrous2	ZFYVE28
1.37077e-179	0.416817	0.925	0.908	4.59727e-175	Ast_fibrous2	WWOX
4.81772e-70	0.416635	0.285	0.194	1.61577e-65	Ast_fibrous2	AC108062.1
2.62833e-169	0.415766	0.117	0.036	8.81488e-165	Ast_fibrous2	COL24A1
1.27826e-98	0.415263	0.145	0.068	4.28702e-94	Ast_fibrous2	FAM189A1
8.65054e-77	0.414693	0.209	0.125	2.90122e-72	Ast_fibrous2	PRPSAP1
9.18759e-120	0.41426	0.132	0.054	3.08134e-115	Ast_fibrous2	GRK5
4.80588e-91	0.414123	0.19	0.104	1.61179e-86	Ast_fibrous2	CPEB1
7.32134e-45	0.413879	0.287	0.213	2.45543e-40	Ast_fibrous2	AC073050.1
8.23632e-63	0.412843	0.308	0.218	2.7623e-58	Ast_fibrous2	DCHS2
1.6869e-72	0.411729	0.23	0.143	5.65753e-68	Ast_fibrous2	FRMPD3
2.16045e-36	0.411478	0.185	0.129	7.2457e-32	Ast_fibrous2	HSP90B1
1.10877e-59	0.411456	0.415	0.329	3.71858e-55	Ast_fibrous2	ULK4
6.71346e-50	0.411074	0.441	0.365	2.25156e-45	Ast_fibrous2	PAXBP1
3.03431e-61	0.410697	0.223	0.144	1.01765e-56	Ast_fibrous2	PLCL1
1.5058e-66	0.410397	0.424	0.333	5.05015e-62	Ast_fibrous2	ANKRD36C
1.49547e-108	0.409376	0.145	0.065	5.0155e-104	Ast_fibrous2	SLC22A4
3.84972e-98	0.408733	0.176	0.09	1.29112e-93	Ast_fibrous2	SEMA3A
7.31757e-90	0.408475	0.195	0.107	2.45417e-85	Ast_fibrous2	TOB1
1.5837e-53	0.408308	0.398	0.317	5.31141e-49	Ast_fibrous2	SLC16A1-AS1
3.86408e-78	0.407834	0.218	0.132	1.29593e-73	Ast_fibrous2	AZIN1
4.61726e-116	0.407312	0.133	0.056	1.54854e-111	Ast_fibrous2	PXYLP1
7.26471e-61	0.406905	0.249	0.168	2.43644e-56	Ast_fibrous2	PTGES3
2.97459e-67	0.406754	0.425	0.33	9.97619e-63	Ast_fibrous2	SMC5
1.92783e-115	0.4065	0.125	0.051	6.46555e-111	Ast_fibrous2	SYN2
8.28206e-97	0.405871	0.174	0.089	2.77764e-92	Ast_fibrous2	STARD9
2.27352e-60	0.405357	0.432	0.34	7.62494e-56	Ast_fibrous2	BNC2
2.43623e-53	0.405155	0.164	0.1	8.17062e-49	Ast_fibrous2	SPSB1
1.02541e-56	0.403996	0.526	0.455	3.43902e-52	Ast_fibrous2	PALLD
7.31025e-200	0.402989	0.127	0.037	2.45171e-195	Ast_fibrous2	SAMD11
1.14055e-70	0.40239	0.619	0.55	3.82516e-66	Ast_fibrous2	BMPR1A
3.565e-95	0.401739	0.791	0.765	1.19563e-90	Ast_fibrous2	GRAMD2B
9.61319e-70	0.401512	0.692	0.648	3.22407e-65	Ast_fibrous2	MAPT
1.31294e-35	0.401329	0.245	0.185	4.40333e-31	Ast_fibrous2	KSR1
3.18387e-59	0.399614	0.254	0.172	1.06781e-54	Ast_fibrous2	SKI
1.26789e-53	0.398898	0.34	0.258	4.25224e-49	Ast_fibrous2	PRKX
3.21975e-93	0.398224	0.19	0.103	1.07984e-88	Ast_fibrous2	CORO1C
2.0035e-220	0.397993	0.103	0.024	6.71934e-216	Ast_fibrous2	TNFRSF19
2.54969e-78	0.397207	0.654	0.578	8.55114e-74	Ast_fibrous2	NPAS2
2.29855e-73	0.397049	0.183	0.105	7.70886e-69	Ast_fibrous2	HSPA8
8.21696e-56	0.396764	0.6	0.536	2.75581e-51	Ast_fibrous2	NAALADL2
2.37168e-99	0.395756	0.213	0.116	7.95415e-95	Ast_fibrous2	SHTN1
5.48884e-77	0.394948	0.273	0.177	1.84085e-72	Ast_fibrous2	SSBP3
3.6729e-54	0.394612	0.395	0.314	1.23182e-49	Ast_fibrous2	GOLIM4
7.57864e-46	0.394206	0.354	0.283	2.54172e-41	Ast_fibrous2	BCLAF1
2.00343e-52	0.393608	0.492	0.42	6.71909e-48	Ast_fibrous2	DYRK1A
6.13259e-139	0.393205	0.13	0.048	2.05675e-134	Ast_fibrous2	EPHA5
1.34794e-47	0.392584	0.718	0.698	4.52074e-43	Ast_fibrous2	GPM6B
2.21735e-68	0.392312	0.66	0.6	7.43656e-64	Ast_fibrous2	GAREM1
9.25808e-29	0.392306	0.259	0.205	3.10497e-24	Ast_fibrous2	BAG3
2.99466e-79	0.390998	0.105	0.046	1.00435e-74	Ast_fibrous2	NHS
2.92982e-167	0.389804	0.917	0.913	9.82604e-163	Ast_fibrous2	NEBL
8.60841e-36	0.389035	0.209	0.152	2.88709e-31	Ast_fibrous2	STK24
3.82501e-52	0.389004	0.385	0.299	1.28283e-47	Ast_fibrous2	NKAIN2
7.82743e-98	0.388423	0.136	0.062	2.62516e-93	Ast_fibrous2	EGF
8.96404e-52	0.387452	0.288	0.209	3.00636e-47	Ast_fibrous2	CHD7
6.63159e-56	0.386575	0.303	0.222	2.2241e-51	Ast_fibrous2	ATP13A3
1.5693e-275	0.386559	1	1	5.26311e-271	Ast_fibrous2	MALAT1
3.44406e-58	0.386276	0.275	0.192	1.15507e-53	Ast_fibrous2	ACTG1
1.81874e-65	0.386092	0.495	0.406	6.09968e-61	Ast_fibrous2	CEP112
4.24923e-87	0.385736	0.151	0.076	1.42511e-82	Ast_fibrous2	CNTNAP1
6.34017e-37	0.385626	0.335	0.269	2.12637e-32	Ast_fibrous2	DDR2
1.75244e-135	0.385362	0.104	0.034	5.87734e-131	Ast_fibrous2	REEP1
3.03474e-99	0.385303	0.901	0.865	1.01779e-94	Ast_fibrous2	KAZN
1.06356e-56	0.38487	0.32	0.232	3.56698e-52	Ast_fibrous2	PCED1B
4.084e-42	0.384498	0.183	0.122	1.36969e-37	Ast_fibrous2	STK40
6.91644e-52	0.383908	0.27	0.192	2.31964e-47	Ast_fibrous2	ACTB
1.32251e-45	0.382999	0.587	0.541	4.43544e-41	Ast_fibrous2	FIGN
1.27901e-80	0.382345	0.193	0.109	4.28953e-76	Ast_fibrous2	PRR16
5.62677e-69	0.382302	0.133	0.069	1.88711e-64	Ast_fibrous2	AC090568.2
3.26489e-43	0.382128	0.39	0.318	1.09498e-38	Ast_fibrous2	MKL1
4.0979e-71	0.380885	0.633	0.566	1.37435e-66	Ast_fibrous2	DOCK3
1.63121e-68	0.380575	0.768	0.722	5.47075e-64	Ast_fibrous2	REV3L
5.08981e-67	0.380027	0.649	0.585	1.70702e-62	Ast_fibrous2	BICD1
4.00269e-143	0.379506	0.896	0.877	1.34242e-138	Ast_fibrous2	PDE4DIP
4.02613e-231	0.379245	0.115	0.028	1.35028e-226	Ast_fibrous2	AL162511.1
7.6229e-117	0.378015	0.128	0.052	2.55657e-112	Ast_fibrous2	AC008667.1
1.22204e-49	0.376769	0.166	0.104	4.09848e-45	Ast_fibrous2	SPATA17
1.28294e-63	0.375361	0.414	0.315	4.30273e-59	Ast_fibrous2	RTN1
1.63925e-35	0.37508	0.247	0.187	5.49771e-31	Ast_fibrous2	CTNNB1
2.94207e-30	0.37353	0.129	0.086	9.86711e-26	Ast_fibrous2	UGCG
2.21281e-57	0.373104	0.238	0.16	7.42131e-53	Ast_fibrous2	DNAJB6
9.12672e-61	0.369475	0.26	0.176	3.06092e-56	Ast_fibrous2	ARHGAP10
1.00076e-99	0.369123	0.149	0.07	3.35634e-95	Ast_fibrous2	DUSP1
1.76148e-28	0.368437	0.138	0.094	5.90764e-24	Ast_fibrous2	NUDT4
4.67986e-80	0.366915	0.133	0.065	1.56953e-75	Ast_fibrous2	AL662796.1
3.45039e-106	0.366815	0.814	0.722	1.15719e-101	Ast_fibrous2	TSHZ2
6.17602e-60	0.366489	0.247	0.167	2.07131e-55	Ast_fibrous2	C1QTNF3-AMACR
1.57405e-35	0.365567	0.318	0.257	5.27904e-31	Ast_fibrous2	NUBPL
2.58757e-45	0.365452	0.483	0.417	8.6782e-41	Ast_fibrous2	ATP9A
1.03974e-25	0.363757	0.415	0.368	3.4871e-21	Ast_fibrous2	NFIX
1.09355e-35	0.363653	0.22	0.16	3.66755e-31	Ast_fibrous2	PTMA
1.00725e-48	0.363561	0.201	0.133	3.37811e-44	Ast_fibrous2	TMC1
3.40951e-41	0.36342	0.411	0.344	1.14348e-36	Ast_fibrous2	FUT8
2.62708e-49	0.362936	0.263	0.189	8.81071e-45	Ast_fibrous2	UBE2B
1.03355e-25	0.36197	0.387	0.335	3.46632e-21	Ast_fibrous2	IRS2
8.47006e-43	0.360334	0.362	0.286	2.84069e-38	Ast_fibrous2	AHNAK
1.59506e-80	0.359999	0.764	0.719	5.34952e-76	Ast_fibrous2	RFX3
8.24469e-48	0.359182	0.444	0.368	2.76511e-43	Ast_fibrous2	SGMS1
3.3575e-67	0.358655	0.168	0.097	1.12604e-62	Ast_fibrous2	GNAI2
1.13997e-40	0.357706	0.286	0.216	3.82324e-36	Ast_fibrous2	KREMEN1
2.32135e-34	0.357621	0.292	0.227	7.78533e-30	Ast_fibrous2	PLCH1
1.21297e-43	0.356529	0.516	0.441	4.06807e-39	Ast_fibrous2	TOGARAM2
4.1884e-118	0.355872	0.138	0.058	1.4047e-113	Ast_fibrous2	NLRP1
4.06034e-44	0.355752	0.448	0.376	1.36176e-39	Ast_fibrous2	STAT3
2.13568e-47	0.355556	0.126	0.073	7.16263e-43	Ast_fibrous2	CD9
4.98332e-51	0.355553	0.226	0.154	1.67131e-46	Ast_fibrous2	HSPA9
8.18602e-42	0.355544	0.525	0.459	2.74543e-37	Ast_fibrous2	CAMK2D
1.57073e-61	0.355395	0.187	0.114	5.26793e-57	Ast_fibrous2	ABCA2
2.27201e-45	0.354755	0.179	0.118	7.61988e-41	Ast_fibrous2	MORF4L2
1.33856e-39	0.354718	0.338	0.268	4.48926e-35	Ast_fibrous2	BACH2
3.46726e-56	0.354669	0.587	0.506	1.16285e-51	Ast_fibrous2	DLGAP1
9.99001e-37	0.354534	0.328	0.263	3.35045e-32	Ast_fibrous2	CSPP1
3.36243e-62	0.354461	0.233	0.152	1.12769e-57	Ast_fibrous2	COBL
4.3695e-41	0.35304	0.319	0.251	1.46544e-36	Ast_fibrous2	ARHGAP12
2.53336e-47	0.35254	0.313	0.236	8.49639e-43	Ast_fibrous2	ADAM22
3.6174e-64	0.351466	0.198	0.121	1.2132e-59	Ast_fibrous2	ST6GALNAC3
3.70239e-52	0.351434	0.276	0.195	1.24171e-47	Ast_fibrous2	MAML3
1.37169e-43	0.350718	0.255	0.187	4.60036e-39	Ast_fibrous2	MDFIC
1.0352e-147	0.350485	0.109	0.035	3.47185e-143	Ast_fibrous2	CCND2
1.13464e-35	0.350259	0.215	0.157	3.80537e-31	Ast_fibrous2	KIF13B
2.11035e-31	0.349935	0.455	0.403	7.07768e-27	Ast_fibrous2	SIK2
2.13866e-156	0.349647	0.103	0.031	7.17263e-152	Ast_fibrous2	AC104461.1
5.99088e-72	0.348605	0.158	0.087	2.00922e-67	Ast_fibrous2	SH3BGRL2
4.43428e-103	0.348604	0.139	0.062	1.48717e-98	Ast_fibrous2	TMEM132E
4.91528e-51	0.348094	0.172	0.108	1.64849e-46	Ast_fibrous2	PLEKHG3
1.89254e-45	0.347765	0.443	0.366	6.34719e-41	Ast_fibrous2	LTBP1
4.01553e-61	0.347756	0.17	0.101	1.34673e-56	Ast_fibrous2	CCDC136
7.96279e-38	0.347303	0.39	0.323	2.67056e-33	Ast_fibrous2	FGF14
8.95295e-39	0.346998	0.125	0.077	3.00264e-34	Ast_fibrous2	TXNIP
9.02324e-42	0.346675	0.182	0.122	3.02621e-37	Ast_fibrous2	CHST3
7.44467e-26	0.346165	0.353	0.301	2.49679e-21	Ast_fibrous2	CMSS1
7.76166e-80	0.344945	0.111	0.051	2.60311e-75	Ast_fibrous2	AL445472.1
7.38174e-87	0.342617	0.125	0.058	2.47569e-82	Ast_fibrous2	CAP2
4.28316e-49	0.342525	0.15	0.092	1.43649e-44	Ast_fibrous2	SLC9A3R1
3.49294e-47	0.341886	0.248	0.176	1.17146e-42	Ast_fibrous2	RAB11A
2.40948e-38	0.341287	0.357	0.286	8.0809e-34	Ast_fibrous2	AC008014.1
1.3296e-99	0.34128	0.107	0.043	4.45922e-95	Ast_fibrous2	GABARAPL1
1.709e-38	0.341011	0.417	0.353	5.73166e-34	Ast_fibrous2	IFT88
5.86735e-21	0.339678	0.171	0.129	1.96779e-16	Ast_fibrous2	ACTN1
2.00443e-66	0.339368	0.147	0.08	6.72247e-62	Ast_fibrous2	ZBTB46
1.00147e-36	0.339002	0.43	0.37	3.35874e-32	Ast_fibrous2	WAC
1.16241e-54	0.337578	0.162	0.097	3.89848e-50	Ast_fibrous2	NUPR1
1.41115e-48	0.337349	0.235	0.164	4.73271e-44	Ast_fibrous2	TRA2B
5.10733e-27	0.336966	0.208	0.157	1.7129e-22	Ast_fibrous2	FAM20C
1.16484e-50	0.335886	0.244	0.17	3.90665e-46	Ast_fibrous2	AC016705.2
1.73004e-52	0.335739	0.124	0.07	5.80221e-48	Ast_fibrous2	BTG2
8.56623e-75	0.334808	0.166	0.092	2.87294e-70	Ast_fibrous2	SEC11C
2.67178e-51	0.334785	0.625	0.569	8.96061e-47	Ast_fibrous2	MAP4
8.29416e-116	0.334784	0.102	0.037	2.7817e-111	Ast_fibrous2	AL133346.1
1.38547e-34	0.333851	0.459	0.4	4.6466e-30	Ast_fibrous2	USP54
8.0356e-20	0.33229	0.261	0.219	2.69498e-15	Ast_fibrous2	DDX3X
3.97172e-89	0.331245	0.117	0.052	1.33204e-84	Ast_fibrous2	GNAI1
1.24607e-280	0.32982	0.997	0.996	4.17905e-276	Ast_fibrous2	NRG3
2.64835e-55	0.329661	0.734	0.672	8.88205e-51	Ast_fibrous2	AKAP6
8.68345e-48	0.329646	0.201	0.134	2.91226e-43	Ast_fibrous2	HSPD1
2.69485e-98	0.329014	0.129	0.058	9.03798e-94	Ast_fibrous2	CCDC173
2.3418e-52	0.328273	0.163	0.1	7.85392e-48	Ast_fibrous2	VPS37B
6.29864e-60	0.327721	0.198	0.123	2.11244e-55	Ast_fibrous2	SLC37A1
5.64574e-81	0.326352	0.117	0.054	1.89347e-76	Ast_fibrous2	ADAMTS6
5.60469e-34	0.325914	0.787	0.789	1.8797e-29	Ast_fibrous2	ITPKB
8.99526e-33	0.325332	0.399	0.337	3.01683e-28	Ast_fibrous2	LINC00882
1.81043e-31	0.325032	0.503	0.454	6.0718e-27	Ast_fibrous2	GAN
1.06722e-94	0.323962	0.101	0.04	3.57924e-90	Ast_fibrous2	PRICKLE1
8.68712e-70	0.323463	0.137	0.072	2.91349e-65	Ast_fibrous2	WDR1
1.12089e-24	0.322896	0.29	0.239	3.75926e-20	Ast_fibrous2	AC104123.1
4.4749e-76	0.322759	0.118	0.056	1.50079e-71	Ast_fibrous2	TIMP2
1.01665e-42	0.322449	0.197	0.134	3.40965e-38	Ast_fibrous2	HACD2
3.36456e-23	0.322049	0.406	0.365	1.12841e-18	Ast_fibrous2	FRS2
3.14148e-38	0.321721	0.391	0.322	1.05359e-33	Ast_fibrous2	PATJ
1.67253e-26	0.321652	0.639	0.619	5.60933e-22	Ast_fibrous2	ADD3
4.91921e-44	0.32136	0.268	0.196	1.64981e-39	Ast_fibrous2	ZNF273
2.65907e-25	0.321056	0.306	0.253	8.91798e-21	Ast_fibrous2	PHYHD1
7.16365e-96	0.320892	0.119	0.051	2.40255e-91	Ast_fibrous2	VWA3B
2.16661e-23	0.320641	0.374	0.327	7.26637e-19	Ast_fibrous2	MOK
5.53901e-17	0.320155	0.361	0.323	1.85767e-12	Ast_fibrous2	RAB7A
2.07771e-43	0.31962	0.157	0.1	6.96821e-39	Ast_fibrous2	NAPA
6.00758e-73	0.31954	0.148	0.078	2.01482e-68	Ast_fibrous2	AGPAT4
5.38115e-34	0.319367	0.419	0.35	1.80473e-29	Ast_fibrous2	FRMPD4
1.03277e-36	0.318187	0.521	0.465	3.46371e-32	Ast_fibrous2	ANKS1B
1.27993e-82	0.317694	0.109	0.048	4.29261e-78	Ast_fibrous2	IFITM3
1.4589e-31	0.316428	0.163	0.114	4.89284e-27	Ast_fibrous2	CCDC170
7.22305e-25	0.316427	0.307	0.254	2.42247e-20	Ast_fibrous2	MAN2A1
1.96061e-53	0.315591	0.183	0.114	6.5755e-49	Ast_fibrous2	RHPN1
1.98835e-44	0.31531	0.159	0.101	6.66854e-40	Ast_fibrous2	MAN1A1
3.202e-58	0.315163	0.333	0.238	1.07389e-53	Ast_fibrous2	ABI3BP
2.04882e-73	0.314914	0.119	0.057	6.87133e-69	Ast_fibrous2	IER2
4.08263e-69	0.314781	0.159	0.088	1.36923e-64	Ast_fibrous2	PLXNC1
8.06218e-30	0.314462	0.389	0.332	2.70389e-25	Ast_fibrous2	CASC2
2.81558e-40	0.313293	0.417	0.347	9.4429e-36	Ast_fibrous2	AFF4
7.39086e-38	0.313007	0.612	0.568	2.47875e-33	Ast_fibrous2	CASK
1.02811e-31	0.312622	0.274	0.216	3.44808e-27	Ast_fibrous2	PPP2R2A
2.92077e-35	0.312614	0.218	0.159	9.79568e-31	Ast_fibrous2	TMED10
1.46971e-32	0.31226	0.292	0.231	4.92913e-28	Ast_fibrous2	LRRC1
2.62889e-66	0.311692	0.142	0.077	8.81677e-62	Ast_fibrous2	ANXA11
5.21062e-28	0.311417	0.311	0.254	1.74754e-23	Ast_fibrous2	PHYKPL
4.06329e-55	0.311385	0.181	0.111	1.36275e-50	Ast_fibrous2	GRIA3
4.53379e-38	0.310341	0.229	0.164	1.52054e-33	Ast_fibrous2	ACTN2
2.99193e-49	0.310121	0.11	0.06	1.00343e-44	Ast_fibrous2	ATOH8
1.35338e-25	0.309532	0.278	0.224	4.53898e-21	Ast_fibrous2	FTL
4.00232e-22	0.308354	0.459	0.422	1.3423e-17	Ast_fibrous2	ARHGAP42
9.86573e-29	0.308128	0.195	0.144	3.30877e-24	Ast_fibrous2	EVA1C
5.0701e-21	0.307944	0.366	0.318	1.70041e-16	Ast_fibrous2	PHACTR1
1.83582e-38	0.307748	0.271	0.203	6.15698e-34	Ast_fibrous2	FHOD3
9.4373e-32	0.307586	0.25	0.192	3.16508e-27	Ast_fibrous2	SNX25
4.58346e-40	0.307486	0.128	0.079	1.5372e-35	Ast_fibrous2	SLC19A2
4.62976e-57	0.307128	0.145	0.083	1.55273e-52	Ast_fibrous2	STAMBPL1
6.85047e-44	0.306529	0.198	0.133	2.29751e-39	Ast_fibrous2	ARHGAP39
6.59024e-52	0.306372	0.136	0.079	2.21023e-47	Ast_fibrous2	MLF1
1.09768e-53	0.306049	0.127	0.071	3.6814e-49	Ast_fibrous2	CFAP61
2.30286e-45	0.305085	0.154	0.096	7.72334e-41	Ast_fibrous2	FLNA
1.63978e-32	0.303511	0.518	0.465	5.49951e-28	Ast_fibrous2	RFX3-AS1
5.20467e-34	0.301646	0.245	0.184	1.74554e-29	Ast_fibrous2	FEZ1
8.77489e-33	0.301409	0.26	0.2	2.94292e-28	Ast_fibrous2	AP2A2
8.24586e-24	0.301341	0.217	0.169	2.76549e-19	Ast_fibrous2	SLC25A25
2.0204e-63	0.301247	0.193	0.115	6.77603e-59	Ast_fibrous2	ATP1B1
5.59947e-29	0.29938	0.262	0.206	1.87795e-24	Ast_fibrous2	ETNK1
2.78055e-52	0.29887	0.155	0.092	9.32539e-48	Ast_fibrous2	ENTPD2
1.95117e-63	0.298865	0.141	0.077	6.54385e-59	Ast_fibrous2	CCDC141
2.19796e-52	0.298222	0.148	0.088	7.37153e-48	Ast_fibrous2	PAX6
1.68575e-25	0.297839	0.202	0.154	5.65367e-21	Ast_fibrous2	AC008537.1
2.81105e-15	0.297544	0.375	0.342	9.42769e-11	Ast_fibrous2	MTSS1L
1.50042e-37	0.297126	0.478	0.416	5.03212e-33	Ast_fibrous2	MEF2A
4.8973e-62	0.296937	0.825	0.809	1.64246e-57	Ast_fibrous2	ABLIM1
3.65103e-40	0.296589	0.186	0.126	1.22448e-35	Ast_fibrous2	TTC39C
1.21683e-83	0.296525	0.114	0.051	4.08101e-79	Ast_fibrous2	ECM2
5.95291e-44	0.296004	0.158	0.1	1.99649e-39	Ast_fibrous2	MAMDC2-AS1
3.29685e-22	0.295806	0.474	0.436	1.1057e-17	Ast_fibrous2	RTN4
6.4959e-41	0.29553	0.142	0.089	2.1786e-36	Ast_fibrous2	USP2
3.8645e-28	0.295302	0.254	0.2	1.29608e-23	Ast_fibrous2	LAMP2
4.32741e-23	0.294721	0.339	0.291	1.45133e-18	Ast_fibrous2	DENND5A
4.52607e-29	0.293988	0.384	0.324	1.51795e-24	Ast_fibrous2	ARMH1
4.58085e-51	0.293494	0.145	0.085	1.53632e-46	Ast_fibrous2	JUND
4.93241e-25	0.293035	0.189	0.143	1.65423e-20	Ast_fibrous2	ACTR3
1.65263e-46	0.292961	0.188	0.122	5.54258e-42	Ast_fibrous2	RGL3
2.41418e-25	0.292601	0.203	0.155	8.09667e-21	Ast_fibrous2	ANP32A
2.21063e-55	0.291784	0.129	0.072	7.41401e-51	Ast_fibrous2	JOSD1
1.15756e-39	0.291779	0.198	0.136	3.88223e-35	Ast_fibrous2	RASA3
2.23599e-21	0.291735	0.289	0.241	7.49908e-17	Ast_fibrous2	CCDC146
1.79872e-64	0.291496	0.11	0.054	6.03256e-60	Ast_fibrous2	AC106869.1
4.23821e-70	0.291351	0.132	0.067	1.42141e-65	Ast_fibrous2	FBXO2
6.73679e-40	0.291234	0.214	0.152	2.25939e-35	Ast_fibrous2	FANCL
2.12969e-54	0.290878	0.135	0.076	7.14256e-50	Ast_fibrous2	ADAMTS12
1.50992e-25	0.290874	0.251	0.2	5.06398e-21	Ast_fibrous2	UBE2G1
2.31178e-28	0.290122	0.324	0.266	7.75324e-24	Ast_fibrous2	DIXDC1
1.83658e-44	0.289913	0.156	0.098	6.15953e-40	Ast_fibrous2	USH1C
1.5605e-22	0.289754	0.469	0.434	5.2336e-18	Ast_fibrous2	DYNC2H1
1.92496e-29	0.28947	0.229	0.175	6.45593e-25	Ast_fibrous2	ODF2L
2.08555e-25	0.289016	0.45	0.402	6.99452e-21	Ast_fibrous2	ARIH1
1.04869e-45	0.286953	0.146	0.09	3.5171e-41	Ast_fibrous2	PDK3
1.4066e-18	0.286569	0.376	0.327	4.71747e-14	Ast_fibrous2	PDZRN4
8.22003e-29	0.285754	0.213	0.16	2.75683e-24	Ast_fibrous2	SYNM
4.79275e-43	0.285702	0.197	0.133	1.60739e-38	Ast_fibrous2	PLEKHA2
7.93844e-51	0.284532	0.725	0.682	2.66239e-46	Ast_fibrous2	WDR49
6.84654e-30	0.283993	0.21	0.156	2.29619e-25	Ast_fibrous2	FGD6
2.03419e-37	0.28374	0.267	0.196	6.82228e-33	Ast_fibrous2	PLCB4
7.69808e-32	0.283737	0.194	0.14	2.58178e-27	Ast_fibrous2	RGS22
1.62875e-80	0.283364	0.927	0.924	5.46249e-76	Ast_fibrous2	DPP6
5.3717e-20	0.281948	0.111	0.077	1.80156e-15	Ast_fibrous2	CNTNAP5
5.22844e-27	0.281576	0.212	0.16	1.75352e-22	Ast_fibrous2	PLCD3
2.29743e-14	0.281043	0.369	0.336	7.70513e-10	Ast_fibrous2	MGAT5
1.75489e-34	0.280888	0.168	0.114	5.88556e-30	Ast_fibrous2	C3
9.75282e-51	0.28027	0.106	0.057	3.2709e-46	Ast_fibrous2	AC124947.1
4.62578e-20	0.279491	0.259	0.215	1.5514e-15	Ast_fibrous2	CPEB2
3.55546e-22	0.278996	0.435	0.389	1.19243e-17	Ast_fibrous2	TSC22D2
1.16289e-32	0.278402	0.177	0.124	3.90009e-28	Ast_fibrous2	P2RX7
5.18573e-21	0.277661	0.305	0.257	1.73919e-16	Ast_fibrous2	CCDC6
1.04615e-21	0.277549	0.412	0.367	3.50857e-17	Ast_fibrous2	LRRFIP2
8.67545e-40	0.277318	0.705	0.671	2.90957e-35	Ast_fibrous2	SOX6
6.21034e-21	0.27729	0.283	0.237	2.08282e-16	Ast_fibrous2	STIM1
1.27717e-20	0.276978	0.196	0.155	4.28337e-16	Ast_fibrous2	KATNAL1
6.71207e-25	0.276957	0.316	0.264	2.25109e-20	Ast_fibrous2	CEP126
1.09432e-28	0.276748	0.55	0.505	3.67015e-24	Ast_fibrous2	SDCCAG8
4.03867e-21	0.276611	0.601	0.579	1.35449e-16	Ast_fibrous2	SLC7A11
8.60181e-33	0.276562	0.167	0.115	2.88488e-28	Ast_fibrous2	B3GAT2
6.31948e-25	0.276513	0.195	0.147	2.11943e-20	Ast_fibrous2	LAMC1
1.81897e-30	0.276365	0.201	0.147	6.10047e-26	Ast_fibrous2	AP1S2
3.66421e-39	0.275125	0.112	0.065	1.2289e-34	Ast_fibrous2	GBP1
9.53998e-20	0.274891	0.442	0.402	3.19952e-15	Ast_fibrous2	PLEKHA7
1.02237e-39	0.274405	0.102	0.059	3.42883e-35	Ast_fibrous2	ZBTB21
1.34503e-42	0.273746	0.122	0.072	4.51095e-38	Ast_fibrous2	GPR137C
2.08714e-19	0.273637	0.309	0.265	6.99986e-15	Ast_fibrous2	RNF13
2.8027e-63	0.272977	0.111	0.055	9.3997e-59	Ast_fibrous2	STIP1
6.19131e-45	0.272324	0.144	0.088	2.07644e-40	Ast_fibrous2	ENO4
7.17594e-39	0.271837	0.859	0.85	2.40667e-34	Ast_fibrous2	MAML2
3.0946e-63	0.271775	0.109	0.054	1.03787e-58	Ast_fibrous2	ANXA2
9.81878e-30	0.271329	0.185	0.134	3.29302e-25	Ast_fibrous2	GATM
4.52664e-33	0.271277	0.267	0.205	1.51815e-28	Ast_fibrous2	ZNF83
2.25706e-57	0.271113	0.126	0.068	7.56971e-53	Ast_fibrous2	RASGEF1A
2.44989e-15	0.270154	0.288	0.25	8.21644e-11	Ast_fibrous2	TOP1
2.92231e-31	0.269479	0.189	0.135	9.80083e-27	Ast_fibrous2	PQLC1
3.14507e-34	0.269398	0.486	0.421	1.05479e-29	Ast_fibrous2	GRIK4
3.90838e-38	0.268089	0.108	0.064	1.31079e-33	Ast_fibrous2	CHODL
1.00692e-22	0.266812	0.323	0.274	3.377e-18	Ast_fibrous2	ITGA6
3.87995e-19	0.266348	0.204	0.162	1.30126e-14	Ast_fibrous2	POT1-AS1
1.28493e-14	0.265669	0.253	0.216	4.3094e-10	Ast_fibrous2	SMOX
2.11525e-40	0.265348	0.262	0.19	7.09414e-36	Ast_fibrous2	CSMD2
1.67109e-19	0.265215	0.167	0.128	5.60449e-15	Ast_fibrous2	EFHC2
1.93261e-16	0.265075	0.313	0.274	6.48158e-12	Ast_fibrous2	RAB1A
2.12317e-34	0.265031	0.207	0.148	7.12069e-30	Ast_fibrous2	SEMA3D
9.70266e-23	0.264533	0.206	0.159	3.25408e-18	Ast_fibrous2	RRBP1
4.99875e-35	0.264467	0.187	0.13	1.67648e-30	Ast_fibrous2	SNORC
7.63895e-13	0.263749	0.18	0.148	2.56195e-08	Ast_fibrous2	YBX3
3.65465e-23	0.263311	0.234	0.184	1.2257e-18	Ast_fibrous2	STOX2
2.98892e-17	0.263139	0.249	0.207	1.00242e-12	Ast_fibrous2	C8orf37-AS1
9.61464e-18	0.262315	0.232	0.19	3.22456e-13	Ast_fibrous2	PPM1E
4.56076e-25	0.261705	0.198	0.15	1.52959e-20	Ast_fibrous2	WDR78
3.60129e-25	0.26164	0.372	0.319	1.2078e-20	Ast_fibrous2	CAST
1.31164e-34	0.261638	0.199	0.141	4.39898e-30	Ast_fibrous2	NPNT
3.5428e-53	0.260149	0.101	0.052	1.18818e-48	Ast_fibrous2	ANKUB1
3.38339e-19	0.260008	0.317	0.271	1.13472e-14	Ast_fibrous2	ARMC2
2.96429e-26	0.259969	0.249	0.192	9.94163e-22	Ast_fibrous2	RGS20
5.33279e-28	0.259955	0.281	0.221	1.78851e-23	Ast_fibrous2	KIF6
3.34757e-28	0.259873	0.6	0.565	1.12271e-23	Ast_fibrous2	RBM6
1.42375e-20	0.259562	0.291	0.245	4.77498e-16	Ast_fibrous2	ASXL1
1.32061e-18	0.259104	0.475	0.44	4.42905e-14	Ast_fibrous2	ARID4B
3.01214e-46	0.259052	0.114	0.063	1.01021e-41	Ast_fibrous2	ZFP36
7.82544e-22	0.258927	0.258	0.21	2.6245e-17	Ast_fibrous2	CD109
2.91347e-12	0.258913	0.177	0.147	9.7712e-08	Ast_fibrous2	NELL2
2.85642e-32	0.258747	0.185	0.131	9.57985e-28	Ast_fibrous2	DEAF1
4.28812e-18	0.257696	0.363	0.321	1.43815e-13	Ast_fibrous2	PSAP
1.11618e-31	0.257438	0.688	0.653	3.74345e-27	Ast_fibrous2	IMMP2L
1.63448e-28	0.256958	0.611	0.576	5.48171e-24	Ast_fibrous2	ARHGAP21
4.84467e-29	0.256757	0.211	0.157	1.62481e-24	Ast_fibrous2	STXBP1
3.4593e-22	0.256246	0.389	0.341	1.16018e-17	Ast_fibrous2	WDR11-AS1
1.10047e-20	0.25621	0.259	0.214	3.69076e-16	Ast_fibrous2	AEBP2
4.38528e-16	0.25615	0.189	0.151	1.47074e-11	Ast_fibrous2	KNOP1
1.70059e-33	0.256081	0.686	0.655	5.70344e-29	Ast_fibrous2	ZFAND3
3.62341e-29	0.255614	0.603	0.56	1.21522e-24	Ast_fibrous2	NAV1
1.85728e-27	0.255556	0.19	0.14	6.22895e-23	Ast_fibrous2	RALGPS2
2.22747e-54	0.255479	0.111	0.058	7.47048e-50	Ast_fibrous2	CALCRL
3.54103e-38	0.255202	0.156	0.102	1.18759e-33	Ast_fibrous2	SMC5-AS1
1.02267e-23	0.255132	0.622	0.597	3.42982e-19	Ast_fibrous2	TTC28
2.31774e-17	0.255063	0.253	0.212	7.77323e-13	Ast_fibrous2	PHACTR2
1.13633e-31	0.254722	0.182	0.128	3.81104e-27	Ast_fibrous2	DUSP16
1.09036e-08	0.2544	0.272	0.248	0.000365684	Ast_fibrous2	ACO2
2.20661e-09	0.254264	0.265	0.238	7.40053e-05	Ast_fibrous2	CCDC30
2.84283e-08	0.254041	0.482	0.468	0.000953429	Ast_fibrous2	MAPRE2
6.62593e-16	0.253839	0.458	0.422	2.22221e-11	Ast_fibrous2	ADAMTS9-AS2
9.51506e-24	0.253434	0.184	0.138	3.19116e-19	Ast_fibrous2	CCNL1
9.43161e-22	0.253053	0.233	0.186	3.16317e-17	Ast_fibrous2	NUP153
3.35143e-44	0.252904	0.365	0.279	1.124e-39	Ast_fibrous2	DOCK10
2.03712e-17	0.252104	0.306	0.265	6.83208e-13	Ast_fibrous2	MVB12B
3.71618e-14	0.251682	0.746	0.744	1.24633e-09	Ast_fibrous2	FAM189A2
3.79637e-27	0.251396	0.268	0.211	1.27323e-22	Ast_fibrous2	ABCC1
3.9565e-19	0.25087	0.236	0.191	1.32693e-14	Ast_fibrous2	AC026316.5
1.51482e-22	0.250711	0.273	0.223	5.08041e-18	Ast_fibrous2	AC239809.3
1.67533e-23	0.25048	0.193	0.146	5.61871e-19	Ast_fibrous2	HEG1
2.34732e-25	0.250215	0.18	0.133	7.87245e-21	Ast_fibrous2	PDIA3
4.08949e-35	0.250178	0.279	0.209	1.37153e-30	Ast_fibrous2	HSPA1B
2.80236e-14	0.250144	0.165	0.132	9.39855e-10	Ast_fibrous2	GFRA2

## Sheet: Ast_immune1
p_val	avg_log2FC	pct.1	pct.2	p_val_adj	cluster	gene
0	2.41686	0.708	0.175	0	Ast_immune1	CHI3L1
0	2.02801	0.469	0.077	0	Ast_immune1	GBP2
0	1.98285	0.508	0.141	0	Ast_immune1	RASGEF1B
1.97494e-287	1.97836	0.394	0.098	6.62356e-283	Ast_immune1	WARS
0	1.93218	0.818	0.439	0	Ast_immune1	CADPS
1.92706e-218	1.7459	0.367	0.105	6.46296e-214	Ast_immune1	FN1
1.62557e-217	1.7392	0.518	0.204	5.45184e-213	Ast_immune1	GNA14
3.10715e-277	1.73199	0.401	0.103	1.04208e-272	Ast_immune1	NAMPT
0	1.67149	0.752	0.332	0	Ast_immune1	F3
0	1.66401	0.831	0.4	0	Ast_immune1	TPST1
1.46447e-185	1.64425	0.392	0.129	4.91154e-181	Ast_immune1	EMP1
1.51338e-251	1.63078	0.729	0.366	5.07557e-247	Ast_immune1	CLIC4
0	1.61257	0.539	0.122	0	Ast_immune1	ACTN1
3.49562e-225	1.51501	0.533	0.205	1.17236e-220	Ast_immune1	PKNOX2
9.10151e-89	1.49805	0.57	0.367	3.05246e-84	Ast_immune1	GPR158
1.08445e-203	1.47622	0.275	0.065	3.63702e-199	Ast_immune1	GBP1
0	1.45829	0.759	0.335	0	Ast_immune1	ARHGEF3
7.2402e-268	1.44221	0.564	0.202	2.42822e-263	Ast_immune1	SLC39A14
3.12841e-283	1.43302	0.913	0.67	1.04921e-278	Ast_immune1	SAMD4A
3.86616e-186	1.42015	0.764	0.509	1.29663e-181	Ast_immune1	DNER
7.04386e-189	1.40534	0.172	0.029	2.36237e-184	Ast_immune1	FAM129A
3.49773e-306	1.396	0.886	0.494	1.17307e-301	Ast_immune1	CD44
2.72951e-281	1.38834	0.651	0.261	9.15423e-277	Ast_immune1	ZFYVE28
1.02614e-231	1.3695	0.2	0.032	3.44146e-227	Ast_immune1	CHI3L2
6.69874e-229	1.33683	0.624	0.279	2.24662e-224	Ast_immune1	CPNE8
4.78337e-173	1.3337	0.665	0.377	1.60425e-168	Ast_immune1	ELL2
0	1.32953	0.29	0.041	0	Ast_immune1	SPOCD1
6.03149e-185	1.30678	0.618	0.296	2.02284e-180	Ast_immune1	MAN1C1
2.21199e-151	1.29939	0.576	0.28	7.41856e-147	Ast_immune1	ANGPTL4
0	1.29883	0.525	0.154	0	Ast_immune1	OSMR
3.70223e-223	1.2817	0.417	0.128	1.24165e-218	Ast_immune1	ITPKC
7.92389e-178	1.27806	0.274	0.071	2.65751e-173	Ast_immune1	APOL2
6.04843e-123	1.26889	0.497	0.248	2.02852e-118	Ast_immune1	ADAM12
4.27912e-209	1.2426	0.561	0.232	1.43513e-204	Ast_immune1	OSMR-AS1
3.4141e-181	1.24236	0.34	0.101	1.14502e-176	Ast_immune1	SPSB1
5.85069e-157	1.21249	0.8	0.582	1.9622e-152	Ast_immune1	MARCH3
0	1.20416	0.304	0.039	0	Ast_immune1	C11orf96
8.12836e-76	1.19401	0.271	0.116	2.72609e-71	Ast_immune1	DDX58
7.61609e-266	1.19056	0.408	0.109	2.55428e-261	Ast_immune1	PLSCR1
1.0438e-14	1.18875	0.197	0.133	3.5007e-10	Ast_immune1	SDS
3.44325e-87	1.16028	0.627	0.432	1.1548e-82	Ast_immune1	PPFIA2
1.87212e-157	1.15864	0.282	0.081	6.27871e-153	Ast_immune1	LOXL2
6.01791e-116	1.15149	0.461	0.221	2.01829e-111	Ast_immune1	BTBD11
1.23593e-172	1.15039	0.391	0.136	4.14506e-168	Ast_immune1	IFI16
2.81527e-206	1.14885	0.33	0.088	9.44187e-202	Ast_immune1	UBASH3B
1.33259e-230	1.14234	0.299	0.068	4.46924e-226	Ast_immune1	IL1RAP
4.80389e-125	1.14119	0.384	0.159	1.61113e-120	Ast_immune1	ATP11A
5.36778e-103	1.1391	0.494	0.264	1.80025e-98	Ast_immune1	KCND3
4.58941e-196	1.13752	0.5	0.19	1.5392e-191	Ast_immune1	RGS20
4.35858e-102	1.10912	0.249	0.085	1.46178e-97	Ast_immune1	AC092131.1
4.52606e-82	1.10653	0.153	0.043	1.51795e-77	Ast_immune1	TNFAIP2
1.09356e-79	1.09517	0.322	0.15	3.66757e-75	Ast_immune1	PARP14
2.80981e-108	1.09303	0.69	0.465	9.42353e-104	Ast_immune1	GLUL
3.23035e-90	1.08477	0.402	0.198	1.0834e-85	Ast_immune1	SLC44A3
1.38661e-124	1.08011	0.565	0.313	4.6504e-120	Ast_immune1	ANO6
5.7869e-88	1.07879	0.359	0.167	1.94081e-83	Ast_immune1	BAALC-AS1
2.52514e-152	1.07464	0.751	0.508	8.46882e-148	Ast_immune1	ETV6
3.81719e-131	1.07359	0.428	0.183	1.28021e-126	Ast_immune1	CRISPLD1
3.05604e-196	1.07099	0.425	0.144	1.02493e-191	Ast_immune1	YBX3
2.37783e-175	1.06578	0.831	0.564	7.97478e-171	Ast_immune1	TENM4
8.67926e-123	1.0643	0.186	0.046	2.91085e-118	Ast_immune1	GAP43
1.86884e-129	1.05978	0.88	0.801	6.2677e-125	Ast_immune1	AHCYL1
1.79596e-58	1.04886	0.313	0.159	6.0233e-54	Ast_immune1	KCNQ3
1.0677e-183	1.03753	0.2	0.039	3.58086e-179	Ast_immune1	LMO2
1.33426e-98	1.01774	0.229	0.076	4.47484e-94	Ast_immune1	COL4A1
1.17381e-103	1.01436	0.575	0.35	3.93671e-99	Ast_immune1	GALNT2
5.29748e-228	1.00225	0.287	0.063	1.77667e-223	Ast_immune1	ZFP36
5.54558e-168	1.00112	0.949	0.883	1.85988e-163	Ast_immune1	GLIS3
1.19574e-115	0.999573	0.346	0.138	4.01028e-111	Ast_immune1	TIPARP
2.8197e-129	0.988052	0.326	0.115	9.45671e-125	Ast_immune1	C3
1.55119e-117	0.971631	0.535	0.279	5.20239e-113	Ast_immune1	MAP3K14
2.13628e-156	0.971312	0.402	0.148	7.16466e-152	Ast_immune1	MYH9
1.44069e-96	0.967578	0.146	0.036	4.8318e-92	Ast_immune1	IFIT3
1.12148e-156	0.964144	0.302	0.09	3.76121e-152	Ast_immune1	PDPN
4.01435e-84	0.962264	0.583	0.373	1.34633e-79	Ast_immune1	WWTR1
6.81763e-65	0.959121	0.674	0.519	2.2865e-60	Ast_immune1	CLIP1
3.17093e-81	0.95496	0.563	0.356	1.06347e-76	Ast_immune1	SNED1
5.24758e-103	0.950396	0.581	0.343	1.75993e-98	Ast_immune1	CNTNAP3B
1.50936e-230	0.945834	0.288	0.063	5.06209e-226	Ast_immune1	TCAF2
4.26996e-98	0.942687	0.175	0.049	1.43206e-93	Ast_immune1	MX1
2.70547e-72	0.941782	0.494	0.303	9.0736e-68	Ast_immune1	MYO1E
8.86162e-124	0.940194	0.701	0.463	2.97201e-119	Ast_immune1	MAPRE2
1.10893e-55	0.936973	0.379	0.216	3.71912e-51	Ast_immune1	COL4A2
7.13647e-91	0.930075	0.718	0.529	2.39343e-86	Ast_immune1	COLEC12
7.7758e-148	0.929851	0.351	0.121	2.60785e-143	Ast_immune1	NOD1
5.74544e-61	0.925314	0.561	0.38	1.92691e-56	Ast_immune1	IGFBP7
1.29074e-145	0.916103	0.338	0.114	4.32889e-141	Ast_immune1	AL355974.2
3.58306e-118	0.914496	0.234	0.07	1.20169e-113	Ast_immune1	HRH1
1.32382e-169	0.912262	0.429	0.155	4.43982e-165	Ast_immune1	FAM20C
1.91003e-131	0.912024	0.382	0.147	6.40587e-127	Ast_immune1	HILPDA
1.41653e-119	0.886491	0.204	0.055	4.75074e-115	Ast_immune1	SLC16A7
1.15784e-112	0.867734	0.257	0.084	3.88318e-108	Ast_immune1	RFTN1
1.12124e-177	0.861766	0.266	0.066	3.7604e-173	Ast_immune1	SERPING1
2.59747e-121	0.855938	0.313	0.111	8.71138e-117	Ast_immune1	GALNT16
2.18913e-102	0.855718	0.336	0.138	7.3419e-98	Ast_immune1	SUSD6
4.9377e-124	0.853337	0.973	0.954	1.65601e-119	Ast_immune1	NEAT1
5.40095e-89	0.853257	0.51	0.288	1.81137e-84	Ast_immune1	ZFP36L2
2.26089e-23	0.847941	0.125	0.061	7.58258e-19	Ast_immune1	AKAP12
1.02711e-86	0.846063	0.516	0.304	3.44472e-82	Ast_immune1	MKL2
5.34575e-75	0.841785	0.69	0.51	1.79286e-70	Ast_immune1	SPOCK1
1.52102e-74	0.840131	0.414	0.221	5.10119e-70	Ast_immune1	ARID5B
1.92733e-40	0.838772	0.177	0.08	6.46388e-36	Ast_immune1	HAS2
8.91288e-45	0.831292	0.2	0.091	2.9892e-40	Ast_immune1	SORCS1
2.7068e-52	0.830167	0.233	0.109	9.07806e-48	Ast_immune1	IFI44L
1.13606e-61	0.823866	0.386	0.211	3.81013e-57	Ast_immune1	DAB2IP
1.12103e-47	0.823039	0.628	0.505	3.75973e-43	Ast_immune1	TMTC2
3.18809e-110	0.821273	0.828	0.69	1.06922e-105	Ast_immune1	TRIO
2.18407e-101	0.812775	0.22	0.069	7.32493e-97	Ast_immune1	ADAMTS3
7.9955e-47	0.809429	0.581	0.42	2.68153e-42	Ast_immune1	MT2A
1.73603e-77	0.807325	0.231	0.088	5.8223e-73	Ast_immune1	ALPK1
1.79623e-80	0.805307	0.518	0.299	6.02419e-76	Ast_immune1	MATN2
1.01415e-107	0.805203	0.801	0.606	3.40124e-103	Ast_immune1	BCL6
2.84105e-47	0.803346	0.13	0.046	9.52832e-43	Ast_immune1	RND1
1.2626e-80	0.802646	0.733	0.56	4.23451e-76	Ast_immune1	CACNA1C
2.27669e-96	0.801451	0.854	0.74	7.63555e-92	Ast_immune1	MAPK4
1.0128e-63	0.799133	0.749	0.626	3.39673e-59	Ast_immune1	BAALC
2.98261e-58	0.791796	0.506	0.336	1.00031e-53	Ast_immune1	IRS2
1.05551e-178	0.785441	0.143	0.021	3.53997e-174	Ast_immune1	CCL2
5.05775e-88	0.784954	0.464	0.247	1.69627e-83	Ast_immune1	PXDN
2.05437e-41	0.783356	0.489	0.342	6.88994e-37	Ast_immune1	SPRED1
1.2068e-148	0.782939	0.982	0.976	4.04736e-144	Ast_immune1	DST
5.4496e-47	0.774254	0.539	0.382	1.82769e-42	Ast_immune1	MAOB
8.12333e-74	0.771621	0.888	0.831	2.7244e-69	Ast_immune1	PDE4B
1.52363e-64	0.771386	0.479	0.284	5.10994e-60	Ast_immune1	AEBP1
3.70107e-92	0.768433	0.326	0.135	1.24127e-87	Ast_immune1	LDLR
1.66305e-104	0.768064	0.925	0.854	5.57754e-100	Ast_immune1	NRCAM
4.88935e-61	0.76761	0.694	0.538	1.63979e-56	Ast_immune1	GALNT18
4.34528e-81	0.766282	0.724	0.554	1.45732e-76	Ast_immune1	BMPR1A
2.65348e-52	0.765492	0.296	0.154	8.89924e-48	Ast_immune1	SULF1
9.37447e-115	0.76446	0.142	0.03	3.14401e-110	Ast_immune1	IRF1
2.75985e-52	0.764196	0.805	0.724	9.25598e-48	Ast_immune1	LPP
1.03602e-60	0.76389	0.647	0.485	3.47459e-56	Ast_immune1	PRKCE
1.54218e-90	0.762497	0.27	0.102	5.17217e-86	Ast_immune1	STAT1
1.05057e-60	0.758903	0.599	0.421	3.5234e-56	Ast_immune1	ADAMTS9-AS2
5.7561e-43	0.758072	0.335	0.195	1.93048e-38	Ast_immune1	CSMD2
1.1522e-86	0.752207	0.611	0.389	3.86424e-82	Ast_immune1	CNN3
2.58891e-207	0.749656	0.991	0.977	8.68269e-203	Ast_immune1	DTNA
4.17419e-25	0.746463	0.372	0.268	1.39994e-20	Ast_immune1	SHISA9
1.08974e-29	0.745531	0.851	0.8	3.65478e-25	Ast_immune1	TNC
8.45702e-238	0.734899	0.993	0.982	2.83632e-233	Ast_immune1	MACF1
2.65202e-60	0.733204	0.779	0.679	8.89434e-56	Ast_immune1	CDHR3
2.15338e-57	0.73177	0.69	0.551	7.22202e-53	Ast_immune1	PRRX1
4.08239e-116	0.721935	0.237	0.072	1.36915e-111	Ast_immune1	APOL6
8.61566e-32	0.718334	0.479	0.357	2.88952e-27	Ast_immune1	PLOD2
5.30536e-54	0.711051	0.356	0.197	1.77931e-49	Ast_immune1	SPPL2A
5.01306e-54	0.708007	0.442	0.277	1.68128e-49	Ast_immune1	SMAD3
4.01298e-50	0.701394	0.76	0.654	1.34587e-45	Ast_immune1	ABCA1
1.33861e-61	0.70125	0.3	0.145	4.48942e-57	Ast_immune1	METTL2B
2.05579e-37	0.696084	0.537	0.398	6.8947e-33	Ast_immune1	CALN1
2.53745e-29	0.694143	0.411	0.289	8.51009e-25	Ast_immune1	SYBU
1.62131e-82	0.693927	0.154	0.043	5.43755e-78	Ast_immune1	IL1R1
1.14984e-45	0.69158	0.318	0.175	3.85632e-41	Ast_immune1	SIPA1L2
2.51475e-72	0.688782	0.152	0.046	8.43396e-68	Ast_immune1	EDNRA
2.55942e-67	0.688253	0.358	0.182	8.58378e-63	Ast_immune1	PVT1
6.99792e-62	0.687272	0.685	0.534	2.34696e-57	Ast_immune1	MGST1
3.4686e-62	0.683573	0.315	0.155	1.1633e-57	Ast_immune1	PHC2
1.46794e-57	0.682779	0.286	0.14	4.92317e-53	Ast_immune1	HOPX
3.17561e-70	0.682727	0.346	0.166	1.06503e-65	Ast_immune1	GADD45B
2.71817e-147	0.681214	0.14	0.024	9.11618e-143	Ast_immune1	KIAA0040
1.94867e-57	0.680457	0.227	0.099	6.53546e-53	Ast_immune1	SNTB2
1.06933e-107	0.680314	0.165	0.041	3.58631e-103	Ast_immune1	CIITA
8.31184e-164	0.675176	0.175	0.033	2.78762e-159	Ast_immune1	GADD45A
6.55059e-35	0.66967	0.51	0.38	2.19694e-30	Ast_immune1	RBPMS
1.38583e-44	0.669573	0.409	0.258	4.64781e-40	Ast_immune1	CRIM1
1.93267e-62	0.666562	0.583	0.397	6.48181e-58	Ast_immune1	SCARA3
6.25123e-73	0.664352	0.297	0.132	2.09654e-68	Ast_immune1	PLPP4
3.68703e-85	0.662289	0.288	0.116	1.23655e-80	Ast_immune1	CEBPD
3.13566e-21	0.657163	0.186	0.109	1.05164e-16	Ast_immune1	CXCL14
1.01081e-29	0.656661	0.902	0.869	3.39005e-25	Ast_immune1	KAZN
1.5385e-60	0.65038	0.718	0.576	5.15981e-56	Ast_immune1	MRVI1
4.46729e-106	0.649768	0.158	0.039	1.49824e-101	Ast_immune1	ARID5A
3.92523e-34	0.645875	0.709	0.619	1.31644e-29	Ast_immune1	MAP1B
6.89444e-73	0.64258	0.269	0.112	2.31226e-68	Ast_immune1	SULF2
6.52699e-134	0.638888	0.138	0.025	2.18902e-129	Ast_immune1	RGS16
1.59401e-14	0.638795	0.194	0.128	5.34598e-10	Ast_immune1	GEM
2.74625e-100	0.636555	0.213	0.066	9.21038e-96	Ast_immune1	ZDHHC9
6.58062e-55	0.636197	0.3	0.15	2.20701e-50	Ast_immune1	FRMPD3
2.22976e-91	0.635028	0.169	0.047	7.47817e-87	Ast_immune1	KCNK1
2.16868e-64	0.632492	0.287	0.132	7.27331e-60	Ast_immune1	GFRA2
4.51898e-53	0.632358	0.688	0.56	1.51557e-48	Ast_immune1	DPYSL2
8.02185e-42	0.63064	0.42	0.273	2.69037e-37	Ast_immune1	PTPN9
3.47568e-60	0.628018	0.569	0.38	1.16567e-55	Ast_immune1	STAT3
4.24655e-56	0.626713	0.224	0.096	1.42421e-51	Ast_immune1	NUDT4
8.67706e-73	0.626655	0.852	0.8	2.91011e-68	Ast_immune1	PTPRZ1
2.13878e-47	0.620404	0.225	0.105	7.17304e-43	Ast_immune1	EPAS1
3.11312e-34	0.620079	0.504	0.372	1.04408e-29	Ast_immune1	LTBP1
7.94709e-48	0.618097	0.266	0.134	2.6653e-43	Ast_immune1	IL6R
1.83558e-41	0.617752	0.536	0.393	6.15615e-37	Ast_immune1	FGF2
4.84435e-45	0.616498	0.503	0.349	1.6247e-40	Ast_immune1	TANC1
9.1453e-45	0.613965	0.47	0.309	3.06715e-40	Ast_immune1	NRP2
6.82157e-73	0.608171	0.231	0.089	2.28782e-68	Ast_immune1	EFCAB3
1.99724e-63	0.607246	0.173	0.061	6.69833e-59	Ast_immune1	UAP1
5.63477e-130	0.606732	0.143	0.028	1.88979e-125	Ast_immune1	NFIL3
2.27797e-56	0.60488	0.183	0.072	7.63986e-52	Ast_immune1	TRIM22
7.05882e-21	0.603525	0.202	0.123	2.36739e-16	Ast_immune1	LINC00513
2.08687e-13	0.602722	0.635	0.572	6.99894e-09	Ast_immune1	SERPINE2
1.39421e-25	0.600855	0.654	0.565	4.67592e-21	Ast_immune1	LINC00511
4.34449e-33	0.599393	0.579	0.461	1.45706e-28	Ast_immune1	PALLD
3.03103e-17	0.598759	0.413	0.333	1.01655e-12	Ast_immune1	ITPR1
7.21303e-26	0.593513	0.27	0.169	2.41911e-21	Ast_immune1	ACTN2
1.01133e-36	0.592688	0.713	0.636	3.39181e-32	Ast_immune1	TRIM9
2.74936e-29	0.5899	0.17	0.085	9.22081e-25	Ast_immune1	ABTB2
6.59718e-57	0.589013	0.255	0.117	2.21256e-52	Ast_immune1	MIDN
2.15122e-161	0.587536	0.104	0.013	7.21475e-157	Ast_immune1	EGR1
3.71562e-43	0.58734	0.517	0.367	1.24615e-38	Ast_immune1	PAM
9.25701e-45	0.585438	0.253	0.126	3.10462e-40	Ast_immune1	STK40
4.71233e-76	0.582587	0.194	0.066	1.58042e-71	Ast_immune1	GLIPR2
9.23274e-45	0.581619	0.7	0.561	3.09647e-40	Ast_immune1	NAV1
3.12738e-42	0.57855	0.598	0.462	1.04886e-37	Ast_immune1	AKAP13
1.79519e-19	0.576414	0.551	0.465	6.0207e-15	Ast_immune1	CAMK2D
3.73694e-41	0.573196	0.378	0.233	1.2533e-36	Ast_immune1	ELMOD1
4.49485e-40	0.56915	0.348	0.208	1.50748e-35	Ast_immune1	BAG3
3.38268e-41	0.568394	0.698	0.573	1.13448e-36	Ast_immune1	PPP3CA
7.37271e-71	0.568312	0.223	0.085	2.47266e-66	Ast_immune1	GGT5
4.95302e-22	0.566994	0.1	0.045	1.66114e-17	Ast_immune1	DDX60L
6.93416e-49	0.565678	0.342	0.189	2.32558e-44	Ast_immune1	MT1X
3.90831e-22	0.565602	0.31	0.215	1.31077e-17	Ast_immune1	ABCC9
3.42925e-37	0.561776	0.187	0.089	1.1501e-32	Ast_immune1	NDRG1
4.79595e-33	0.560829	0.327	0.205	1.60846e-28	Ast_immune1	ADAM23
9.2857e-68	0.557824	0.254	0.106	3.11424e-63	Ast_immune1	C1RL
2.70841e-59	0.557801	0.102	0.027	9.08346e-55	Ast_immune1	LPAR1
2.37095e-35	0.555053	0.309	0.185	7.95169e-31	Ast_immune1	CHSY1
6.13117e-57	0.554547	0.274	0.129	2.05627e-52	Ast_immune1	MLXIP
1.28557e-29	0.547338	0.104	0.042	4.31154e-25	Ast_immune1	RSAD2
3.05611e-56	0.546478	0.225	0.098	1.02496e-51	Ast_immune1	FEM1C
2.82242e-74	0.54635	0.199	0.069	9.46582e-70	Ast_immune1	BACE2
1.89435e-30	0.546104	0.62	0.522	6.35327e-26	Ast_immune1	HIF1A
2.75454e-27	0.540603	0.464	0.35	9.23816e-23	Ast_immune1	PFKP
5.08008e-47	0.539937	0.461	0.293	1.70376e-42	Ast_immune1	ASAP3
7.06064e-17	0.539653	0.547	0.464	2.368e-12	Ast_immune1	CHST11
1.26574e-64	0.538959	0.222	0.089	4.24502e-60	Ast_immune1	TMBIM1
3.2053e-23	0.537678	0.544	0.447	1.07499e-18	Ast_immune1	ST5
2.13902e-20	0.537498	0.45	0.349	7.17385e-16	Ast_immune1	SLC35F1
1.64209e-32	0.537323	0.669	0.575	5.50725e-28	Ast_immune1	SFMBT2
1.20074e-37	0.536924	0.308	0.178	4.02704e-33	Ast_immune1	PIRT
1.77768e-46	0.536343	0.291	0.153	5.962e-42	Ast_immune1	HDAC7
2.04465e-50	0.536221	0.235	0.107	6.85734e-46	Ast_immune1	HLA-E
3.15054e-08	0.534166	0.412	0.36	0.00105663	Ast_immune1	AL139260.1
1.11909e-24	0.533825	0.211	0.123	3.7532e-20	Ast_immune1	PRAG1
4.47096e-22	0.533745	0.52	0.425	1.49947e-17	Ast_immune1	ZBTB7C
5.47676e-23	0.533269	0.362	0.258	1.8368e-18	Ast_immune1	MAN2A1
4.49473e-27	0.532656	0.416	0.297	1.50744e-22	Ast_immune1	RIC8B
1.05087e-40	0.532035	0.28	0.153	3.52442e-36	Ast_immune1	ENDOD1
1.41605e-37	0.529542	0.348	0.215	4.74915e-33	Ast_immune1	ABCC1
1.76478e-17	0.523423	0.31	0.225	5.91871e-13	Ast_immune1	NLGN4X
1.67978e-13	0.520061	0.461	0.378	5.63366e-09	Ast_immune1	GPC6
1.17592e-26	0.517906	0.324	0.213	3.9438e-22	Ast_immune1	SLC25A37
4.19917e-29	0.516064	0.569	0.454	1.40832e-24	Ast_immune1	ST8SIA1
1.70222e-26	0.514017	0.362	0.25	5.70892e-22	Ast_immune1	C4orf19
6.45566e-23	0.513634	0.448	0.336	2.1651e-18	Ast_immune1	CORO2B
1.50154e-23	0.512557	0.462	0.353	5.03588e-19	Ast_immune1	ITGAV
2.76539e-129	0.512456	0.12	0.02	9.27455e-125	Ast_immune1	SOCS3
8.35119e-31	0.509561	0.224	0.123	2.80082e-26	Ast_immune1	XAF1
5.77257e-61	0.509244	0.176	0.064	1.93601e-56	Ast_immune1	SBNO2
7.84833e-15	0.508907	0.366	0.283	2.63217e-10	Ast_immune1	GALNT10
3.14442e-34	0.508751	0.267	0.147	1.05458e-29	Ast_immune1	AC104574.2
2.27739e-20	0.50769	0.28	0.189	7.63791e-16	Ast_immune1	MAP2K1
5.83925e-46	0.506258	0.136	0.05	1.95837e-41	Ast_immune1	AP000787.1
8.5057e-33	0.505958	0.552	0.429	2.85264e-28	Ast_immune1	FAM135A
2.76277e-85	0.503906	0.139	0.035	9.26579e-81	Ast_immune1	DEPP1
2.5988e-31	0.503673	0.536	0.408	8.71585e-27	Ast_immune1	KDM4C
1.74927e-07	0.499192	0.486	0.431	0.00586671	Ast_immune1	FRMD5
1.14885e-31	0.498899	0.274	0.16	3.853e-27	Ast_immune1	TRAF3IP2
3.53981e-29	0.498597	0.167	0.083	1.18718e-24	Ast_immune1	NFKBIA
1.168e-28	0.497003	0.151	0.073	3.91722e-24	Ast_immune1	SLC22A4
9.21754e-38	0.496746	0.774	0.687	3.09138e-33	Ast_immune1	ERBIN
1.54944e-29	0.495451	0.434	0.307	5.1965e-25	Ast_immune1	MED27
3.93375e-24	0.495182	0.497	0.392	1.3193e-19	Ast_immune1	TSC22D2
1.00483e-47	0.495014	0.197	0.085	3.37001e-43	Ast_immune1	NLRC5
2.00483e-29	0.494712	0.357	0.236	6.7238e-25	Ast_immune1	TEX2
1.44837e-11	0.494374	0.238	0.176	4.85755e-07	Ast_immune1	PKIG
1.03055e-42	0.493032	0.56	0.396	3.45624e-38	Ast_immune1	DPYSL3
5.28125e-37	0.491774	0.574	0.437	1.77123e-32	Ast_immune1	RTN4
4.59926e-49	0.491265	0.11	0.035	1.5425e-44	Ast_immune1	EPSTI1
9.09492e-100	0.489743	0.142	0.033	3.05025e-95	Ast_immune1	GRHL3
2.74175e-25	0.487275	0.726	0.639	9.19529e-21	Ast_immune1	PSD3
2.78343e-33	0.48371	0.284	0.165	9.33508e-29	Ast_immune1	RIMBP2
2.30139e-25	0.483379	0.425	0.309	7.71839e-21	Ast_immune1	B4GALT5
8.3909e-18	0.483294	0.363	0.275	2.81414e-13	Ast_immune1	DDR2
1.2088e-32	0.48271	0.299	0.18	4.05406e-28	Ast_immune1	WTAP
1.4879e-44	0.482181	0.167	0.069	4.99011e-40	Ast_immune1	S100A6
1.13356e-34	0.481966	0.427	0.284	3.80173e-30	Ast_immune1	MAP3K13
6.59452e-26	0.480303	0.607	0.506	2.21167e-21	Ast_immune1	TMTC1
4.32478e-40	0.479694	0.192	0.089	1.45044e-35	Ast_immune1	UGCG
4.98717e-27	0.477373	0.423	0.3	1.6726e-22	Ast_immune1	PMP2
3.03044e-97	0.477351	0.13	0.029	1.01635e-92	Ast_immune1	CDC7
1.81971e-30	0.475261	0.247	0.14	6.10293e-26	Ast_immune1	MSN
5.97471e-33	0.474862	0.458	0.324	2.0038e-28	Ast_immune1	RAB7A
1.93908e-49	0.474376	0.874	0.841	6.50329e-45	Ast_immune1	ITPR2
7.64391e-32	0.473573	0.249	0.141	2.56362e-27	Ast_immune1	CCNL1
6.65544e-25	0.473473	0.394	0.282	2.2321e-20	Ast_immune1	TGFB2
8.93842e-100	0.46945	0.113	0.022	2.99777e-95	Ast_immune1	RNF122
4.69159e-147	0.467132	0.119	0.018	1.57347e-142	Ast_immune1	MYBPH
3.35816e-26	0.466648	0.208	0.116	1.12626e-21	Ast_immune1	MT1M
3.5668e-17	0.466026	0.239	0.16	1.19623e-12	Ast_immune1	AC087482.1
8.98282e-20	0.465904	0.454	0.356	3.01266e-15	Ast_immune1	ATXN7L1
3.71835e-22	0.464279	0.146	0.077	1.24706e-17	Ast_immune1	HERC6
1.30946e-20	0.464075	0.578	0.493	4.39167e-16	Ast_immune1	EPB41L2
2.02644e-27	0.463699	0.163	0.082	6.79627e-23	Ast_immune1	ZC3HAV1
3.08777e-41	0.463632	0.22	0.106	1.03558e-36	Ast_immune1	ST3GAL1
7.88619e-87	0.463441	0.979	0.953	2.64487e-82	Ast_immune1	NAV2
5.65386e-60	0.463056	0.147	0.049	1.89619e-55	Ast_immune1	GLRX
1.21157e-22	0.461788	0.503	0.394	4.06337e-18	Ast_immune1	COL27A1
6.6079e-14	0.461556	0.664	0.632	2.21616e-09	Ast_immune1	WWC1
2.50464e-39	0.460862	0.227	0.114	8.40006e-35	Ast_immune1	PARP9
2.9849e-41	0.460795	0.823	0.751	1.00108e-36	Ast_immune1	LRIG1
1.08841e-17	0.459411	0.657	0.582	3.65031e-13	Ast_immune1	DIP2C
1.39327e-11	0.459365	0.481	0.415	4.67275e-07	Ast_immune1	CDH11
1.11681e-28	0.459049	0.357	0.235	3.74554e-24	Ast_immune1	LIMK2
4.6817e-58	0.459043	0.19	0.073	1.57015e-53	Ast_immune1	BTG2
5.05829e-28	0.458217	0.401	0.276	1.69645e-23	Ast_immune1	MTHFD1L
1.20221e-30	0.457977	0.302	0.186	4.03199e-26	Ast_immune1	PPP1CB
8.03921e-17	0.456985	0.523	0.435	2.69619e-12	Ast_immune1	BMPR2
2.23066e-11	0.455711	0.327	0.259	7.48117e-07	Ast_immune1	AKAP7
1.18281e-59	0.454138	0.924	0.812	3.96692e-55	Ast_immune1	GFAP
4.1501e-20	0.453837	0.473	0.372	1.39186e-15	Ast_immune1	PAXBP1
7.16587e-35	0.453463	0.156	0.07	2.40329e-30	Ast_immune1	B2M
1.53659e-25	0.45292	0.309	0.202	5.15342e-21	Ast_immune1	ME3
2.58805e-18	0.45223	0.228	0.148	8.6798e-14	Ast_immune1	IL33
1.42029e-20	0.45204	0.43	0.335	4.76335e-16	Ast_immune1	PIP4K2A
1.27893e-11	0.451923	0.616	0.561	4.28927e-07	Ast_immune1	PRICKLE2
2.11432e-42	0.44849	0.858	0.769	7.09101e-38	Ast_immune1	CLU
5.47655e-25	0.447903	0.103	0.044	1.83673e-20	Ast_immune1	IFIH1
4.24503e-65	0.447299	0.107	0.028	1.4237e-60	Ast_immune1	IL15RA
7.09101e-16	0.44669	0.54	0.462	2.37818e-11	Ast_immune1	MFHAS1
8.13578e-45	0.443038	0.927	0.916	2.72858e-40	Ast_immune1	PRKCA
2.40363e-18	0.442698	0.179	0.107	8.06129e-14	Ast_immune1	P3H2
6.11229e-13	0.44257	0.558	0.496	2.04994e-08	Ast_immune1	SORCS2
2.57917e-22	0.442043	0.457	0.35	8.65001e-18	Ast_immune1	PREX1
5.18137e-16	0.441059	0.121	0.066	1.73773e-11	Ast_immune1	NRP1
2.84368e-20	0.440091	0.256	0.165	9.53714e-16	Ast_immune1	GBE1
8.69305e-16	0.439599	0.123	0.068	2.91548e-11	Ast_immune1	KCNQ5
3.19843e-14	0.438933	0.281	0.203	1.07269e-09	Ast_immune1	ARSB
3.59857e-36	0.437659	0.307	0.178	1.20689e-31	Ast_immune1	DAP3
2.28907e-22	0.437642	0.134	0.067	7.6771e-18	Ast_immune1	SPTLC3
7.51134e-09	0.437216	0.211	0.157	0.000251915	Ast_immune1	NPC1
2.40216e-38	0.435934	0.109	0.039	8.05635e-34	Ast_immune1	JPH2
1.20612e-34	0.435368	0.15	0.067	4.04508e-30	Ast_immune1	PML
1.46621e-41	0.43376	0.185	0.082	4.91739e-37	Ast_immune1	CNTNAP1
1.5634e-36	0.43355	0.253	0.135	5.24334e-32	Ast_immune1	ABCA3
2.60971e-22	0.433308	0.902	0.891	8.75244e-18	Ast_immune1	AC092691.1
7.89505e-31	0.426682	0.322	0.2	2.64784e-26	Ast_immune1	RALGDS
2.09398e-24	0.424799	0.29	0.184	7.02278e-20	Ast_immune1	ARHGAP10
1.95853e-25	0.422242	0.378	0.26	6.56852e-21	Ast_immune1	ENO1
5.73663e-44	0.420318	0.212	0.097	1.92395e-39	Ast_immune1	RASD1
1.53108e-20	0.42001	0.596	0.5	5.13494e-16	Ast_immune1	C9orf3
9.28413e-43	0.419911	0.229	0.11	3.11371e-38	Ast_immune1	MAPKAPK2
3.09479e-12	0.418906	0.592	0.542	1.03793e-07	Ast_immune1	ALDH1A1
9.74952e-42	0.418359	0.131	0.049	3.26979e-37	Ast_immune1	DHCR24
1.13248e-38	0.417887	0.157	0.067	3.7981e-34	Ast_immune1	PROS1
1.14513e-35	0.417859	0.169	0.077	3.84054e-31	Ast_immune1	KLF6
3.31694e-13	0.417751	0.755	0.727	1.11243e-08	Ast_immune1	REV3L
2.5889e-15	0.416577	0.222	0.148	8.68264e-11	Ast_immune1	EVA1C
1.23714e-48	0.415802	0.144	0.053	4.14911e-44	Ast_immune1	TUBB6
2.98112e-19	0.415469	0.103	0.049	9.99807e-15	Ast_immune1	KCNE4
7.39203e-17	0.415118	0.295	0.208	2.47914e-12	Ast_immune1	VEGFA
2.31499e-32	0.414767	0.259	0.145	7.76401e-28	Ast_immune1	NPNT
1.58673e-40	0.413603	0.913	0.891	5.32158e-36	Ast_immune1	DOCK4
2.76077e-18	0.412752	0.146	0.081	9.25908e-14	Ast_immune1	ADAMTS12
5.68063e-19	0.409924	0.431	0.333	1.90517e-14	Ast_immune1	LYST
3.61665e-20	0.407749	0.591	0.498	1.21295e-15	Ast_immune1	DENND4A
1.23288e-24	0.405005	0.162	0.085	4.13485e-20	Ast_immune1	AVIL
4.2309e-18	0.403501	0.414	0.311	1.41896e-13	Ast_immune1	RETREG1
1.94258e-41	0.402346	0.14	0.055	6.51501e-37	Ast_immune1	FAS
9.92793e-08	0.400885	0.323	0.267	0.00332963	Ast_immune1	SPRED2
3.21624e-31	0.40064	0.196	0.101	1.07866e-26	Ast_immune1	YTHDF1
3.37579e-19	0.400419	0.397	0.294	1.13217e-14	Ast_immune1	DENND5A
4.09571e-24	0.400008	0.266	0.165	1.37362e-19	Ast_immune1	LYVE1
3.18072e-20	0.399671	0.43	0.323	1.06675e-15	Ast_immune1	CAST
2.97971e-17	0.396929	0.385	0.293	9.99336e-13	Ast_immune1	FOXJ3
7.05831e-50	0.394769	0.139	0.049	2.36722e-45	Ast_immune1	C1R
5.18994e-30	0.394561	0.872	0.841	1.7406e-25	Ast_immune1	RFX4
1.95141e-25	0.393158	0.175	0.092	6.54465e-21	Ast_immune1	SLC25A28
5.79289e-24	0.391074	0.316	0.21	1.94282e-19	Ast_immune1	TMEM165
5.97131e-23	0.390568	0.367	0.254	2.00266e-18	Ast_immune1	VCL
7.25221e-28	0.390043	0.891	0.856	2.43224e-23	Ast_immune1	KALRN
8.32674e-27	0.389793	0.27	0.162	2.79262e-22	Ast_immune1	IARS
3.04281e-21	0.389761	0.192	0.112	1.0205e-16	Ast_immune1	ELMSAN1
7.62862e-07	0.389551	0.409	0.359	0.0255849	Ast_immune1	ADAMTS9
1.33205e-06	0.388719	0.246	0.198	0.0446743	Ast_immune1	MYO16
1.84053e-34	0.388645	0.106	0.04	6.17277e-30	Ast_immune1	LGMN
3.10499e-50	0.388096	0.134	0.046	1.04135e-45	Ast_immune1	HAP1
1.27455e-14	0.388026	0.123	0.07	4.27459e-10	Ast_immune1	CA2
2.89782e-35	0.386703	0.18	0.085	9.71871e-31	Ast_immune1	ELK3
1.13141e-22	0.386627	0.249	0.155	3.79453e-18	Ast_immune1	C1S
3.10724e-20	0.386249	0.506	0.403	1.04211e-15	Ast_immune1	HIVEP2
1.12731e-15	0.386103	0.746	0.69	3.78076e-11	Ast_immune1	BMPR1B
1.00815e-15	0.385645	0.307	0.218	3.38114e-11	Ast_immune1	SEPT9
2.58268e-13	0.385134	0.307	0.229	8.66178e-09	Ast_immune1	RASAL2
2.2095e-16	0.385073	0.5	0.404	7.41022e-12	Ast_immune1	CDH23
7.07018e-24	0.385015	0.226	0.133	2.3712e-19	Ast_immune1	LMNA
1.80976e-24	0.384332	0.197	0.111	6.06958e-20	Ast_immune1	CD82
2.14687e-20	0.382065	0.311	0.213	7.20017e-16	Ast_immune1	VMP1
3.90923e-10	0.380739	0.404	0.338	1.31108e-05	Ast_immune1	MGAT5
8.57071e-25	0.380654	0.211	0.121	2.87444e-20	Ast_immune1	KDM7A
2.40999e-17	0.380598	0.472	0.377	8.08261e-13	Ast_immune1	STUM
2.32113e-24	0.379712	0.174	0.094	7.78462e-20	Ast_immune1	LAP3
2.85062e-26	0.379048	0.224	0.127	9.56039e-22	Ast_immune1	CHST3
4.68236e-13	0.378652	0.162	0.104	1.57037e-08	Ast_immune1	NUPR1
6.15777e-11	0.377659	0.501	0.434	2.06519e-06	Ast_immune1	ALDH1L1
1.35479e-12	0.375151	0.767	0.733	4.54371e-08	Ast_immune1	TSHZ2
4.13686e-24	0.373732	0.36	0.247	1.38742e-19	Ast_immune1	ZNF708
1.51065e-26	0.373267	0.219	0.124	5.06643e-22	Ast_immune1	PGAP1
7.06918e-09	0.372946	0.335	0.275	0.000237086	Ast_immune1	TMEM164
1.29943e-45	0.372386	0.119	0.04	4.35804e-41	Ast_immune1	HELB
1.178e-24	0.372055	0.288	0.182	3.95077e-20	Ast_immune1	MPZL1
3.74956e-58	0.37112	0.977	0.959	1.25753e-53	Ast_immune1	SORBS1
6.17041e-19	0.369287	0.313	0.215	2.06943e-14	Ast_immune1	CD99
3.50517e-49	0.368015	0.103	0.031	1.17556e-44	Ast_immune1	TAP1
6.44415e-20	0.367509	0.322	0.223	2.16124e-15	Ast_immune1	GMDS
1.09952e-09	0.366999	0.448	0.387	3.68758e-05	Ast_immune1	DPYD
1.65149e-14	0.366782	0.27	0.192	5.53876e-10	Ast_immune1	NIM1K
2.87683e-16	0.365924	0.357	0.268	9.64831e-12	Ast_immune1	ROCK2
3.50515e-12	0.365849	0.252	0.183	1.17556e-07	Ast_immune1	SCN1A
3.50856e-23	0.365472	0.124	0.059	1.1767e-18	Ast_immune1	LMOD1
2.51442e-27	0.364406	0.163	0.081	8.43286e-23	Ast_immune1	CARM1
6.44761e-36	0.364358	0.166	0.074	2.1624e-31	Ast_immune1	DDX21
2.5671e-19	0.363987	0.2	0.121	8.60953e-15	Ast_immune1	PPARD
6.42049e-16	0.362071	0.427	0.335	2.1533e-11	Ast_immune1	SMG6
1.3223e-22	0.361031	0.663	0.568	4.43472e-18	Ast_immune1	PPFIA1
8.42344e-24	0.36006	0.124	0.059	2.82505e-19	Ast_immune1	ANXA2
6.60623e-18	0.359693	0.364	0.267	2.2156e-13	Ast_immune1	HIPK3
8.99148e-07	0.359536	0.217	0.171	0.0301556	Ast_immune1	SAT1
3.41018e-20	0.357626	0.233	0.146	1.14371e-15	Ast_immune1	FADS3
3.98826e-19	0.357507	0.377	0.274	1.33758e-14	Ast_immune1	ARHGEF11
8.95482e-16	0.3575	0.5	0.409	3.00327e-11	Ast_immune1	MPRIP
2.30761e-50	0.35704	0.124	0.041	7.73926e-46	Ast_immune1	FOSL2
6.90525e-16	0.356486	0.152	0.09	2.31588e-11	Ast_immune1	TACC2
4.27837e-10	0.356475	0.19	0.134	1.43488e-05	Ast_immune1	SLC43A2
2.59091e-18	0.355605	0.22	0.14	8.68941e-14	Ast_immune1	ZNRF2
2.29704e-11	0.355312	0.28	0.211	7.70381e-07	Ast_immune1	NFKB1
6.18363e-31	0.354415	0.125	0.053	2.07386e-26	Ast_immune1	TNFRSF10B
6.12666e-18	0.354347	0.137	0.076	2.05476e-13	Ast_immune1	DDX60
4.11969e-17	0.352502	0.72	0.655	1.38166e-12	Ast_immune1	IMMP2L
1.01987e-13	0.352022	0.202	0.136	3.42044e-09	Ast_immune1	NPHP4
4.82911e-42	0.351303	0.123	0.045	1.61959e-37	Ast_immune1	PDLIM4
1.25343e-20	0.350009	0.256	0.164	4.20375e-16	Ast_immune1	AC005261.1
1.46566e-15	0.34974	0.168	0.103	4.91552e-11	Ast_immune1	SP110
2.84275e-27	0.34883	0.172	0.088	9.53401e-23	Ast_immune1	SHISA5
8.16563e-18	0.348753	0.247	0.162	2.73859e-13	Ast_immune1	RRBP1
6.4109e-18	0.348718	0.222	0.142	2.15009e-13	Ast_immune1	ITGB1
1.04802e-18	0.348301	0.222	0.139	3.51486e-14	Ast_immune1	ARHGAP39
4.95713e-16	0.346081	0.238	0.159	1.66252e-11	Ast_immune1	CCDC80
9.32769e-11	0.345211	0.234	0.17	3.12832e-06	Ast_immune1	LRAT
6.44856e-30	0.344989	0.128	0.056	2.16272e-25	Ast_immune1	PDE8B
1.62873e-12	0.344356	0.206	0.142	5.46245e-08	Ast_immune1	RASA3
6.78784e-13	0.344137	0.266	0.191	2.2765e-08	Ast_immune1	SETBP1
2.67616e-17	0.343183	0.165	0.097	8.9753e-13	Ast_immune1	ZNFX1
4.3293e-07	0.343169	0.208	0.161	0.0145196	Ast_immune1	JAK2
1.24188e-29	0.342403	0.192	0.099	4.16503e-25	Ast_immune1	SLC9B2
2.57349e-25	0.342325	0.759	0.677	8.63097e-21	Ast_immune1	MED13L
2.06738e-10	0.342273	0.519	0.45	6.93358e-06	Ast_immune1	ZDHHC14
5.08193e-16	0.341111	0.299	0.213	1.70438e-11	Ast_immune1	EDEM3
5.58415e-16	0.340433	0.199	0.127	1.87281e-11	Ast_immune1	PNPT1
4.1564e-16	0.339732	0.181	0.112	1.39397e-11	Ast_immune1	RPS6KA3
1.68949e-20	0.338449	0.169	0.094	5.66621e-16	Ast_immune1	APOC1
7.29883e-19	0.336978	0.266	0.177	2.44788e-14	Ast_immune1	GATAD2A
1.2424e-22	0.336098	0.227	0.136	4.16674e-18	Ast_immune1	YARS
4.35989e-07	0.335746	0.636	0.604	0.0146222	Ast_immune1	RNF19A
1.53681e-20	0.334708	0.21	0.126	5.15415e-16	Ast_immune1	POR
1.53549e-19	0.331737	0.431	0.324	5.14974e-15	Ast_immune1	MKL1
1.17973e-11	0.33153	0.236	0.169	3.95658e-07	Ast_immune1	FAM107A
1.38472e-10	0.330049	0.132	0.085	4.64408e-06	Ast_immune1	SAMD9L
1.22371e-14	0.329379	0.486	0.398	4.10409e-10	Ast_immune1	MFAP3L
1.64037e-15	0.329082	0.139	0.08	5.50147e-11	Ast_immune1	APLNR
6.19463e-16	0.327371	0.328	0.239	2.07756e-11	Ast_immune1	PUM3
4.97233e-13	0.327162	0.583	0.518	1.66762e-08	Ast_immune1	FNDC3B
5.22862e-12	0.32615	0.149	0.095	1.75358e-07	Ast_immune1	WNT3
6.99258e-25	0.32581	0.139	0.068	2.34517e-20	Ast_immune1	MVP
4.44684e-32	0.324939	0.147	0.065	1.49138e-27	Ast_immune1	AC022414.1
1.09792e-15	0.324723	0.229	0.154	3.68222e-11	Ast_immune1	YY1AP1
9.71639e-18	0.324701	0.201	0.125	3.25868e-13	Ast_immune1	FAM120C
1.31896e-36	0.324414	0.107	0.039	4.42354e-32	Ast_immune1	MCUB
2.02604e-12	0.323269	0.658	0.609	6.79494e-08	Ast_immune1	CHL1
7.22744e-12	0.322488	0.485	0.413	2.42394e-07	Ast_immune1	CACNA2D1
2.46134e-16	0.321932	0.764	0.723	8.25485e-12	Ast_immune1	APC
1.07245e-11	0.321355	0.365	0.289	3.59678e-07	Ast_immune1	SEPT11
2.87731e-32	0.321209	0.109	0.042	9.64993e-28	Ast_immune1	SNX10
1.14797e-26	0.321084	0.158	0.078	3.85006e-22	Ast_immune1	CPSF4
4.79884e-10	0.319716	0.128	0.082	1.60943e-05	Ast_immune1	CTSB
1.39176e-14	0.319609	0.446	0.355	4.66769e-10	Ast_immune1	PITPNM2
6.13089e-20	0.317558	0.203	0.122	2.05618e-15	Ast_immune1	IPO7
3.06155e-31	0.316395	0.139	0.061	1.02678e-26	Ast_immune1	DUSP22
3.59321e-40	0.316023	0.101	0.033	1.20509e-35	Ast_immune1	MFSD2A
5.85834e-22	0.315582	0.18	0.101	1.96477e-17	Ast_immune1	ENO2
1.5844e-20	0.315511	0.128	0.065	5.31377e-16	Ast_immune1	AC007529.2
1.29169e-22	0.3155	0.152	0.079	4.33208e-18	Ast_immune1	CA3
2.35373e-58	0.315094	0.11	0.031	7.89393e-54	Ast_immune1	SPRED3
5.94118e-25	0.314021	0.114	0.051	1.99255e-20	Ast_immune1	VASN
4.33539e-22	0.313247	0.211	0.124	1.454e-17	Ast_immune1	TNFRSF1A
4.5232e-15	0.312433	0.591	0.501	1.51699e-10	Ast_immune1	FKBP5
3.90513e-19	0.312417	0.12	0.061	1.3097e-14	Ast_immune1	CELF4
5.88277e-13	0.312144	0.115	0.067	1.97296e-08	Ast_immune1	ITGA9
6.07801e-16	0.311589	0.376	0.281	2.03844e-11	Ast_immune1	NEK6
3.16178e-17	0.311246	0.261	0.175	1.0604e-12	Ast_immune1	HM13
1.99735e-07	0.310554	0.268	0.216	0.0066987	Ast_immune1	FSTL1
1.05889e-11	0.310201	0.45	0.37	3.55131e-07	Ast_immune1	GBF1
1.11041e-15	0.309486	0.172	0.105	3.72411e-11	Ast_immune1	PLAGL1
2.94852e-17	0.309029	0.172	0.103	9.88873e-13	Ast_immune1	AC006978.2
1.57485e-13	0.307926	0.224	0.153	5.28174e-09	Ast_immune1	PTPN2
5.09779e-13	0.307884	0.343	0.262	1.7097e-08	Ast_immune1	INTS10
2.86858e-16	0.30724	0.135	0.076	9.62064e-12	Ast_immune1	RAPGEF4
7.6498e-17	0.306544	0.373	0.272	2.56559e-12	Ast_immune1	RAPGEF1
3.22916e-10	0.306496	0.438	0.373	1.083e-05	Ast_immune1	CDC14B
2.68663e-08	0.306148	0.222	0.169	0.000901042	Ast_immune1	STAT2
1.8031e-12	0.306037	0.424	0.343	6.04725e-08	Ast_immune1	MAPKAP1
1.2786e-11	0.304739	0.321	0.247	4.28817e-07	Ast_immune1	CRYBG3
2.96253e-32	0.304708	0.115	0.046	9.93572e-28	Ast_immune1	MAP2K3
5.72025e-17	0.303854	0.161	0.094	1.91846e-12	Ast_immune1	FLOT1
6.39157e-12	0.303707	0.412	0.334	2.1436e-07	Ast_immune1	DPY19L3
5.85202e-29	0.303679	0.139	0.063	1.96265e-24	Ast_immune1	AMD1
1.58895e-18	0.302095	0.183	0.109	5.32902e-14	Ast_immune1	SMIM12
6.43516e-10	0.301969	0.318	0.252	2.15822e-05	Ast_immune1	TOP1
1.03127e-16	0.301666	0.145	0.082	3.45868e-12	Ast_immune1	ACLY
6.15811e-22	0.301536	0.202	0.116	2.06531e-17	Ast_immune1	HSPA5
7.62786e-16	0.301469	0.553	0.462	2.55823e-11	Ast_immune1	STK3
3.84101e-10	0.300975	0.201	0.144	1.2882e-05	Ast_immune1	ARSJ
1.81063e-26	0.299856	0.146	0.07	6.07248e-22	Ast_immune1	HNRNPF
4.70184e-22	0.299757	0.156	0.083	1.5769e-17	Ast_immune1	SLC4A7
1.38128e-06	0.299462	0.496	0.458	0.0463253	Ast_immune1	TBL1X
1.23766e-07	0.299149	0.31	0.256	0.00415085	Ast_immune1	IKZF2
2.36274e-14	0.298359	0.258	0.181	7.92417e-10	Ast_immune1	CDYL
3.0038e-15	0.297813	0.399	0.305	1.00741e-10	Ast_immune1	CMSS1
6.66922e-20	0.297304	0.179	0.103	2.23672e-15	Ast_immune1	AC105942.1
2.33892e-13	0.297024	0.371	0.284	7.84428e-09	Ast_immune1	AQP1
7.77573e-20	0.296277	0.14	0.075	2.60782e-15	Ast_immune1	GCLM
1.4867e-08	0.296143	0.483	0.427	0.000498609	Ast_immune1	KLF7
3.60422e-12	0.293718	0.418	0.34	1.20878e-07	Ast_immune1	SMC5
2.69398e-14	0.293271	0.36	0.271	9.03506e-10	Ast_immune1	ADGRG1
1.70279e-11	0.293108	0.42	0.339	5.71083e-07	Ast_immune1	PLCE1
3.55552e-18	0.292478	0.213	0.133	1.19245e-13	Ast_immune1	CARS
6.37983e-12	0.291212	0.65	0.585	2.13967e-07	Ast_immune1	NPAS2
1.05169e-11	0.291143	0.27	0.2	3.52715e-07	Ast_immune1	RAP1B
5.64063e-12	0.290987	0.202	0.139	1.89175e-07	Ast_immune1	THBS2
1.25119e-11	0.290681	0.176	0.118	4.19625e-07	Ast_immune1	RHOU
2.76654e-13	0.290437	0.302	0.221	9.27842e-09	Ast_immune1	PTPRE
1.73563e-13	0.289832	0.221	0.151	5.82096e-09	Ast_immune1	DDX10
3.15004e-12	0.28904	0.131	0.079	1.05646e-07	Ast_immune1	SPP1
2.74969e-23	0.288942	0.122	0.057	9.22191e-19	Ast_immune1	FABP5
2.18418e-08	0.287624	0.206	0.152	0.000732532	Ast_immune1	U91319.1
3.06525e-19	0.286836	0.103	0.05	1.02803e-14	Ast_immune1	HIF1A-AS2
5.30708e-12	0.28637	0.317	0.238	1.77989e-07	Ast_immune1	LRRFIP1
5.06133e-19	0.286366	0.11	0.054	1.69747e-14	Ast_immune1	IFITM3
5.90996e-13	0.286133	0.132	0.079	1.98208e-08	Ast_immune1	TMOD1
3.93495e-07	0.285506	0.619	0.582	0.013197	Ast_immune1	MAGI1
3.72735e-13	0.285422	0.161	0.102	1.25008e-08	Ast_immune1	FLNA
1.50092e-15	0.285421	0.169	0.104	5.03377e-11	Ast_immune1	GYG1
1.89481e-22	0.284878	0.168	0.091	6.35483e-18	Ast_immune1	FLOT2
2.65678e-08	0.284271	0.125	0.084	0.00089103	Ast_immune1	FSTL3
3.24652e-11	0.283461	0.109	0.065	1.08882e-06	Ast_immune1	RCAN1
1.20561e-27	0.283399	0.125	0.055	4.04338e-23	Ast_immune1	NOCT
3.74665e-14	0.282741	0.195	0.127	1.25655e-09	Ast_immune1	CNTNAP3
2.35923e-14	0.282722	0.208	0.136	7.91239e-10	Ast_immune1	ARHGAP1
8.79073e-09	0.282099	0.767	0.744	0.000294823	Ast_immune1	ASAP1
9.39838e-09	0.282053	0.307	0.246	0.000315203	Ast_immune1	DGKD
2.95577e-15	0.282024	0.194	0.124	9.91306e-11	Ast_immune1	LONRF1
8.69883e-09	0.281956	0.388	0.323	0.000291742	Ast_immune1	ENAH
1.75076e-09	0.281791	0.637	0.592	5.87168e-05	Ast_immune1	BICD1
1.05883e-09	0.281368	0.597	0.543	3.55111e-05	Ast_immune1	PLEKHG1
1.64921e-11	0.280477	0.279	0.207	5.53112e-07	Ast_immune1	SMURF2
8.21667e-14	0.27993	0.158	0.097	2.75571e-09	Ast_immune1	CTTNBP2NL
2.09256e-10	0.279489	0.202	0.143	7.01804e-06	Ast_immune1	STX12
6.58832e-13	0.278905	0.393	0.311	2.20959e-08	Ast_immune1	ANKRD10
6.24432e-12	0.27859	0.23	0.163	2.09422e-07	Ast_immune1	RSU1
1.78996e-13	0.278489	0.304	0.224	6.00317e-09	Ast_immune1	PNPLA8
1.41512e-09	0.278488	0.434	0.365	4.74602e-05	Ast_immune1	MOB3B
1.08672e-11	0.278115	0.377	0.296	3.64466e-07	Ast_immune1	PHACTR4
2.78656e-07	0.277273	0.39	0.334	0.00934556	Ast_immune1	OTUD7B
8.77324e-10	0.276355	0.187	0.132	2.94237e-05	Ast_immune1	NCOA7
1.77305e-10	0.275517	0.446	0.368	5.94644e-06	Ast_immune1	TTTY14
3.56153e-10	0.275419	0.228	0.166	1.19447e-05	Ast_immune1	TUBB2B
1.74675e-15	0.275016	0.318	0.229	5.85826e-11	Ast_immune1	DLG5
5.0951e-07	0.274059	0.679	0.651	0.0170879	Ast_immune1	MAP4K4
7.66061e-07	0.273766	0.309	0.256	0.0256921	Ast_immune1	GYG2
1.9241e-10	0.273509	0.19	0.133	6.45306e-06	Ast_immune1	BAZ1A
5.29814e-11	0.272365	0.467	0.395	1.77689e-06	Ast_immune1	ZNF608
7.42916e-24	0.271383	0.112	0.05	2.49159e-19	Ast_immune1	IER5L
6.42128e-18	0.271059	0.126	0.067	2.15357e-13	Ast_immune1	ITGA3
1.08303e-09	0.270487	0.111	0.07	3.63228e-05	Ast_immune1	IFI44
1.46814e-15	0.270477	0.189	0.119	4.92384e-11	Ast_immune1	SLC7A6
1.86946e-09	0.269877	0.487	0.424	6.26981e-05	Ast_immune1	RAB31
2.26312e-14	0.269421	0.18	0.114	7.59006e-10	Ast_immune1	PGK1
1.57808e-13	0.268961	0.167	0.105	5.29256e-09	Ast_immune1	RIPK1
3.09523e-19	0.268761	0.1	0.047	1.03808e-14	Ast_immune1	AFAP1
8.9573e-08	0.268204	0.421	0.362	0.0030041	Ast_immune1	CD38
2.70637e-16	0.267752	0.138	0.078	9.07662e-12	Ast_immune1	C12orf49
3.20236e-10	0.267593	0.361	0.292	1.07401e-05	Ast_immune1	NUFIP2
2.99337e-10	0.267513	0.844	0.81	1.00392e-05	Ast_immune1	ABLIM1
2.16231e-18	0.26742	0.187	0.112	7.25196e-14	Ast_immune1	URB1
2.79565e-15	0.267234	0.195	0.124	9.37605e-11	Ast_immune1	LMO4
5.65845e-13	0.267129	0.263	0.186	1.89773e-08	Ast_immune1	PITPNB
1.22094e-11	0.267043	0.401	0.322	4.09479e-07	Ast_immune1	SLC13A3
5.5139e-16	0.266357	0.127	0.07	1.84925e-11	Ast_immune1	TMEM132E
1.4527e-17	0.266284	0.162	0.094	4.87205e-13	Ast_immune1	PNRC1
4.82294e-21	0.266053	0.128	0.064	1.61752e-16	Ast_immune1	GNG4
9.71767e-10	0.265219	0.652	0.607	3.25911e-05	Ast_immune1	MSRA
1.07345e-07	0.26514	0.472	0.413	0.00360012	Ast_immune1	CAMSAP2
1.62518e-16	0.264156	0.211	0.135	5.45053e-12	Ast_immune1	MAPK1IP1L
2.75522e-09	0.264095	0.367	0.297	9.24046e-05	Ast_immune1	SCFD2
1.93941e-17	0.263033	0.192	0.116	6.5044e-13	Ast_immune1	JUNB
6.47951e-16	0.262026	0.201	0.127	2.1731e-11	Ast_immune1	PABPC1
6.31533e-12	0.261598	0.359	0.281	2.11804e-07	Ast_immune1	ASCC3
5.19167e-12	0.261015	0.197	0.134	1.74118e-07	Ast_immune1	LPCAT3
7.09448e-09	0.260861	0.506	0.446	0.000237935	Ast_immune1	CCNH
3.32054e-09	0.260359	0.244	0.185	0.000111364	Ast_immune1	PSMG4
1.12152e-11	0.25999	0.218	0.15	3.76135e-07	Ast_immune1	DNAJB1
6.40529e-08	0.259407	0.401	0.342	0.0021482	Ast_immune1	FGFR1
1.97083e-13	0.258907	0.164	0.102	6.60979e-09	Ast_immune1	IFNGR2
2.75133e-10	0.257007	0.672	0.625	9.2274e-06	Ast_immune1	RUFY3
1.00757e-10	0.256559	0.196	0.136	3.3792e-06	Ast_immune1	CPD
2.73082e-10	0.256369	0.216	0.156	9.15864e-06	Ast_immune1	SCN8A
7.90587e-08	0.256314	0.514	0.457	0.00265147	Ast_immune1	AFF1
6.80557e-09	0.256098	0.331	0.266	0.000228245	Ast_immune1	ECPAS
3.3381e-10	0.255222	0.234	0.172	1.11953e-05	Ast_immune1	SH3GLB1
2.47254e-20	0.254718	0.125	0.062	8.29242e-16	Ast_immune1	FRMD3
1.01469e-08	0.253781	0.26	0.2	0.000340306	Ast_immune1	INPP5F
3.01304e-08	0.253151	0.183	0.132	0.00101051	Ast_immune1	TTC39C
5.72298e-11	0.251915	0.205	0.143	1.91937e-06	Ast_immune1	TP53
4.08279e-12	0.25136	0.399	0.316	1.36928e-07	Ast_immune1	AGO2
2.82418e-12	0.250926	0.182	0.121	9.47175e-08	Ast_immune1	NOP58
2.12045e-15	0.250524	0.205	0.132	7.11156e-11	Ast_immune1	CRLS1
1.05853e-08	0.25018	0.308	0.244	0.000355008	Ast_immune1	BRD4

## Sheet: Ast_immune2
p_val	avg_log2FC	pct.1	pct.2	p_val_adj	cluster	gene
0	2.17073	0.519	0.034	0	Ast_immune2	APBB1IP
0	2.14559	0.549	0.039	0	Ast_immune2	DOCK8
0	2.05001	0.489	0.048	0	Ast_immune2	HS3ST4
0	2.02935	0.562	0.08	0	Ast_immune2	SYNDIG1
0	1.9984	0.564	0.056	0	Ast_immune2	ELMO1
0	1.84767	0.559	0.12	0	Ast_immune2	ST6GALNAC3
0	1.79179	0.491	0.066	0	Ast_immune2	SRGAP2
0	1.70318	0.434	0.03	0	Ast_immune2	FYB1
0	1.64742	0.622	0.188	0	Ast_immune2	MEF2C
0	1.58561	0.357	0.015	0	Ast_immune2	RASGEF1C
3.5557e-287	1.53883	0.646	0.215	1.19251e-282	Ast_immune2	ARHGAP24
0	1.5153	0.433	0.061	0	Ast_immune2	RUNX1
0	1.48402	0.342	0.027	0	Ast_immune2	AC008691.1
0	1.47436	0.405	0.031	0	Ast_immune2	ARHGAP15
0	1.46562	0.37	0.033	0	Ast_immune2	IPCEF1
0	1.44908	0.375	0.02	0	Ast_immune2	ATP8B4
0	1.44215	0.443	0.065	0	Ast_immune2	TBXAS1
6.05966e-284	1.42289	0.553	0.155	2.03229e-279	Ast_immune2	KCNQ3
0	1.39369	0.507	0.108	0	Ast_immune2	INPP5D
1.0068e-240	1.38963	0.6	0.207	3.37662e-236	Ast_immune2	SLC8A1
0	1.37382	0.374	0.028	0	Ast_immune2	AOAH
0	1.35979	0.357	0.018	0	Ast_immune2	ADAM28
0	1.33735	0.348	0.016	0	Ast_immune2	SLCO2B1
0	1.33142	0.329	0.019	0	Ast_immune2	AC244021.1
0	1.28717	0.383	0.031	0	Ast_immune2	DOCK2
0	1.28128	0.415	0.079	0	Ast_immune2	ARHGAP22
4.11974e-161	1.25533	0.726	0.417	1.38168e-156	Ast_immune2	MEF2A
0	1.25491	0.299	0.02	0	Ast_immune2	LYN
0	1.25133	0.35	0.032	0	Ast_immune2	PALD1
0	1.24475	0.313	0.012	0	Ast_immune2	CSF1R
3.94699e-195	1.24469	0.92	0.745	1.32374e-190	Ast_immune2	PLXDC2
1.26058e-233	1.24328	0.493	0.148	4.22774e-229	Ast_immune2	FAM49B
6.38017e-186	1.24252	0.604	0.24	2.13978e-181	Ast_immune2	ST6GAL1
0	1.23191	0.346	0.038	0	Ast_immune2	SH3KBP1
1.82629e-161	1.23171	0.675	0.345	6.12502e-157	Ast_immune2	ANKRD44
0	1.2255	0.331	0.031	0	Ast_immune2	SRGAP2B
0	1.2225	0.335	0.032	0	Ast_immune2	DISC1
1.80157e-197	1.21361	0.437	0.132	6.0421e-193	Ast_immune2	CYFIP1
0	1.19915	0.34	0.022	0	Ast_immune2	PTPRC
0	1.18489	0.285	0.015	0	Ast_immune2	AC074327.1
0	1.17755	0.284	0.017	0	Ast_immune2	P2RY12
1.70047e-112	1.15002	0.261	0.077	5.70303e-108	Ast_immune2	SPP1
3.96866e-219	1.12092	0.426	0.113	1.33101e-214	Ast_immune2	C3
0	1.11638	0.291	0.007	0	Ast_immune2	IKZF1
1.23922e-150	1.07997	0.508	0.198	4.15609e-146	Ast_immune2	MAML3
0	1.06737	0.289	0.023	0	Ast_immune2	MYO1F
2.89525e-141	1.05623	0.466	0.18	9.71009e-137	Ast_immune2	DIAPH2
0	1.02635	0.253	0.013	0	Ast_immune2	LRRK1
0	1.02623	0.27	0.009	0	Ast_immune2	SYK
0	1.02611	0.279	0.015	0	Ast_immune2	RHBDF2
0	1.01666	0.252	0.011	0	Ast_immune2	CSF2RA
0	1.00819	0.193	0.008	0	Ast_immune2	CX3CR1
5.3594e-127	1.00692	0.892	0.668	1.79743e-122	Ast_immune2	FRMD4A
2.91016e-129	0.984217	0.433	0.165	9.76008e-125	Ast_immune2	LHFPL2
0	0.983834	0.283	0.028	0	Ast_immune2	LPAR6
0	0.982274	0.261	0.019	0	Ast_immune2	LPCAT2
0	0.980035	0.237	0.014	0	Ast_immune2	IGSF21
8.30008e-199	0.97664	0.261	0.052	2.78368e-194	Ast_immune2	KHDRBS3
0	0.967117	0.277	0.029	0	Ast_immune2	SP100
0	0.962903	0.259	0.009	0	Ast_immune2	RCSD1
0	0.925315	0.225	0.008	0	Ast_immune2	BLNK
0	0.908543	0.261	0.034	0	Ast_immune2	MCF2L
0	0.895959	0.266	0.014	0	Ast_immune2	FLI1
5.08047e-101	0.892312	0.798	0.572	1.70389e-96	Ast_immune2	SFMBT2
0	0.887272	0.242	0.008	0	Ast_immune2	WDFY4
1.27438e-99	0.881447	0.459	0.203	4.27401e-95	Ast_immune2	SH3RF3
0	0.869001	0.236	0.025	0	Ast_immune2	DENND3
0	0.865627	0.243	0.03	0	Ast_immune2	SRGAP2C
0	0.859023	0.214	0.005	0	Ast_immune2	LY86
1.02976e-264	0.853848	0.251	0.038	3.45362e-260	Ast_immune2	RBM47
0	0.853009	0.255	0.029	0	Ast_immune2	TGFBR2
0	0.844986	0.211	0.006	0	Ast_immune2	PIK3R5
1.95958e-93	0.829037	0.453	0.206	6.57202e-89	Ast_immune2	PTPRJ
0	0.828531	0.22	0.014	0	Ast_immune2	SAMSN1
7.68419e-84	0.826576	0.387	0.167	2.57713e-79	Ast_immune2	SAT1
7.22857e-146	0.825787	0.351	0.106	2.42432e-141	Ast_immune2	MGAT4A
1.44529e-74	0.825667	0.697	0.461	4.84722e-70	Ast_immune2	CHST11
1.54343e-78	0.823642	0.72	0.49	5.17636e-74	Ast_immune2	EPB41L2
7.74922e-104	0.819391	0.394	0.154	2.59893e-99	Ast_immune2	HDAC9
9.06732e-88	0.817999	0.786	0.571	3.041e-83	Ast_immune2	FOXN3
9.65428e-205	0.809014	0.232	0.04	3.23785e-200	Ast_immune2	PDE3B
6.33649e-81	0.805102	0.631	0.381	2.12513e-76	Ast_immune2	SSH2
3.76075e-272	0.803387	0.253	0.037	1.26128e-267	Ast_immune2	CPED1
1.01115e-136	0.797988	0.317	0.093	3.39121e-132	Ast_immune2	FMNL3
8.57246e-108	0.795965	0.909	0.728	2.87503e-103	Ast_immune2	LRMDA
7.39758e-93	0.79028	0.462	0.209	2.481e-88	Ast_immune2	ABCC4
0	0.789393	0.187	0.006	0	Ast_immune2	ITGAX
9.9156e-221	0.786703	0.154	0.017	3.32549e-216	Ast_immune2	SRGN
1.5077e-80	0.779398	0.465	0.222	5.05654e-76	Ast_immune2	DSCAM
1.51331e-84	0.77736	0.453	0.212	5.07534e-80	Ast_immune2	OXR1
0	0.776113	0.187	0.007	0	Ast_immune2	AP003481.1
4.8724e-235	0.772604	0.154	0.016	1.63411e-230	Ast_immune2	XACT
0	0.760774	0.181	0.009	0	Ast_immune2	DLEU7-AS1
7.27255e-113	0.760264	0.353	0.123	2.43907e-108	Ast_immune2	SHTN1
5.46403e-138	0.75995	0.292	0.08	1.83253e-133	Ast_immune2	SLC4A7
0	0.749586	0.197	0.011	0	Ast_immune2	ALOX5
1.07952e-54	0.748535	0.321	0.151	3.6205e-50	Ast_immune2	PARP14
8.0254e-69	0.733698	0.582	0.353	2.69156e-64	Ast_immune2	FCHSD2
4.24457e-200	0.730561	0.275	0.056	1.42354e-195	Ast_immune2	SMAP2
0	0.72726	0.18	0.01	0	Ast_immune2	RGS10
1.5596e-187	0.726679	0.224	0.04	5.23058e-183	Ast_immune2	CIITA
3.43293e-66	0.726505	0.353	0.16	1.15134e-61	Ast_immune2	BACH1
0	0.724456	0.202	0.02	0	Ast_immune2	ARHGAP25
5.47485e-93	0.719843	0.563	0.284	1.83616e-88	Ast_immune2	DOCK10
2.92184e-68	0.714054	0.548	0.31	9.79925e-64	Ast_immune2	JAZF1
3.33229e-53	0.709538	0.724	0.559	1.11758e-48	Ast_immune2	SORL1
5.12662e-204	0.705109	0.227	0.038	1.71936e-199	Ast_immune2	PRKCB
1.43898e-187	0.702969	0.195	0.031	4.82606e-183	Ast_immune2	MTSS1
6.69045e-73	0.700166	0.28	0.108	2.24384e-68	Ast_immune2	RTTN
5.53273e-116	0.699004	0.151	0.029	1.85557e-111	Ast_immune2	ACSL1
3.39006e-98	0.69864	0.952	0.89	1.13696e-93	Ast_immune2	DOCK4
3.63026e-152	0.690897	0.22	0.046	1.21752e-147	Ast_immune2	FMN1
1.54137e-58	0.683292	0.336	0.158	5.16946e-54	Ast_immune2	JAK2
0	0.680623	0.175	0.004	0	Ast_immune2	CSF3R
2.0796e-102	0.679934	0.35	0.124	6.97456e-98	Ast_immune2	FOXP2
1.13833e-74	0.676421	0.343	0.144	3.81773e-70	Ast_immune2	ARL15
3.40736e-70	0.676305	0.441	0.218	1.14276e-65	Ast_immune2	PTPRE
1.16666e-90	0.659928	0.302	0.107	3.91273e-86	Ast_immune2	MARCH1
2.35352e-61	0.657949	0.405	0.205	7.89323e-57	Ast_immune2	PAG1
5.11499e-259	0.6577	0.186	0.021	1.71546e-254	Ast_immune2	A2M
2.05365e-88	0.657556	0.35	0.137	6.88753e-84	Ast_immune2	LRCH1
2.64223e-56	0.657504	0.539	0.328	8.86152e-52	Ast_immune2	ZEB2
1.01547e-70	0.653172	0.143	0.038	3.40568e-66	Ast_immune2	CCDC26
1.19951e-181	0.652675	0.208	0.036	4.02292e-177	Ast_immune2	FAM149A
3.98314e-199	0.651861	0.238	0.042	1.33587e-194	Ast_immune2	PLCL2
0	0.649806	0.199	0.016	0	Ast_immune2	LINC02232
1.23305e-107	0.648778	0.23	0.063	4.13541e-103	Ast_immune2	SOCS6
2.45069e-190	0.64709	0.173	0.025	8.21913e-186	Ast_immune2	CD74
2.53245e-89	0.631405	0.227	0.069	8.49334e-85	Ast_immune2	TGFBR1
1.55651e-294	0.630157	0.182	0.018	5.22022e-290	Ast_immune2	PGM5
1.55179e-08	0.621701	0.163	0.111	0.000520438	Ast_immune2	NAMPT
1.76254e-70	0.621697	0.404	0.191	5.9112e-66	Ast_immune2	EML4
0	0.620199	0.171	0.009	0	Ast_immune2	TRPM2
0	0.613997	0.164	0.007	0	Ast_immune2	AC025569.1
3.95472e-286	0.612844	0.152	0.013	1.32633e-281	Ast_immune2	LINC01141
4.72654e-45	0.611679	0.611	0.418	1.58519e-40	Ast_immune2	TBC1D22A
1.03538e-69	0.60889	0.376	0.17	3.47246e-65	Ast_immune2	ZNF710
3.01987e-226	0.607059	0.185	0.024	1.0128e-221	Ast_immune2	KCNQ1
0	0.604346	0.166	0.013	0	Ast_immune2	PIK3AP1
1.56891e-83	0.600506	0.33	0.127	5.26181e-79	Ast_immune2	SKAP2
1.97836e-225	0.59977	0.192	0.025	6.63502e-221	Ast_immune2	LPAR1
3.4613e-72	0.599471	0.222	0.075	1.16085e-67	Ast_immune2	KIF26B
4.22752e-77	0.598019	0.312	0.122	1.41783e-72	Ast_immune2	GRB2
3.42376e-45	0.594883	0.658	0.467	1.14826e-40	Ast_immune2	UBE2E2
1.24499e-58	0.59216	0.339	0.156	4.17546e-54	Ast_immune2	MYO9B
0	0.590221	0.129	0.004	0	Ast_immune2	OTULINL
1.41503e-139	0.584889	0.217	0.047	4.74574e-135	Ast_immune2	DOCK11
4.56028e-88	0.583395	0.266	0.088	1.52943e-83	Ast_immune2	EPB41L3
8.14776e-245	0.582894	0.167	0.018	2.73259e-240	Ast_immune2	PSMA1
5.15734e-56	0.579749	0.485	0.27	1.72967e-51	Ast_immune2	RAPGEF1
3.4672e-121	0.576694	0.232	0.058	1.16283e-116	Ast_immune2	RUNX2
3.95378e-57	0.576631	0.409	0.211	1.32602e-52	Ast_immune2	PCNX2
0	0.575924	0.166	0.006	0	Ast_immune2	NCKAP1L
1.70183e-124	0.574522	0.208	0.048	5.7076e-120	Ast_immune2	PELI1
3.38638e-61	0.57359	0.302	0.13	1.13572e-56	Ast_immune2	SDK1
6.72138e-71	0.573238	0.332	0.139	2.25422e-66	Ast_immune2	SUSD6
4.34653e-51	0.571504	0.422	0.227	1.45774e-46	Ast_immune2	RASAL2
6.40765e-67	0.57068	0.128	0.032	2.149e-62	Ast_immune2	CD83
7.68218e-248	0.567878	0.135	0.012	2.57645e-243	Ast_immune2	TMEM156
8.34022e-51	0.56444	0.565	0.348	2.79714e-46	Ast_immune2	PREX1
7.10865e-89	0.557433	0.249	0.079	2.3841e-84	Ast_immune2	CTSB
3.07011e-104	0.557058	0.202	0.052	1.02965e-99	Ast_immune2	MIS18BP1
5.21928e-71	0.556622	0.136	0.034	1.75044e-66	Ast_immune2	EPSTI1
2.47233e-48	0.554777	0.629	0.417	8.29169e-44	Ast_immune2	PICALM
0	0.551897	0.161	0.006	0	Ast_immune2	FGD2
4.96424e-54	0.549991	0.499	0.284	1.66491e-49	Ast_immune2	ATM
6.41172e-94	0.548361	0.198	0.053	2.15036e-89	Ast_immune2	MAF
2.71387e-91	0.546715	0.224	0.065	9.10176e-87	Ast_immune2	MBP
1.93697e-44	0.544775	0.659	0.462	6.49621e-40	Ast_immune2	AKAP13
4.66253e-10	0.544555	0.118	0.07	1.56372e-05	Ast_immune2	GBP1
1.71273e-22	0.540922	0.281	0.167	5.74417e-18	Ast_immune2	XIST
4.06166e-47	0.540343	0.541	0.336	1.3622e-42	Ast_immune2	CMIP
1.53085e-114	0.540068	0.219	0.054	5.13415e-110	Ast_immune2	TBC1D4
1.87941e-213	0.539968	0.15	0.017	6.30316e-209	Ast_immune2	KCNK13
1.33557e-167	0.538529	0.174	0.028	4.47925e-163	Ast_immune2	TBC1D9
1.15403e-68	0.536556	0.2	0.065	3.87039e-64	Ast_immune2	FRMD4B
1.93447e-288	0.536415	0.148	0.012	6.48783e-284	Ast_immune2	ST8SIA4
8.87828e-210	0.536068	0.138	0.015	2.9776e-205	Ast_immune2	SH2B3
8.96943e-19	0.533134	0.734	0.619	3.00817e-14	Ast_immune2	GRID2
0	0.5319	0.134	0.006	0	Ast_immune2	ITGAM
2.20159e-70	0.531795	0.274	0.104	7.3837e-66	Ast_immune2	RIN3
2.49253e-50	0.531689	0.21	0.083	8.35943e-46	Ast_immune2	AC008050.1
4.17006e-282	0.523486	0.141	0.011	1.39855e-277	Ast_immune2	VAV1
1.47948e-42	0.521869	0.47	0.275	4.96189e-38	Ast_immune2	MTHFD1L
5.83345e-74	0.521613	0.217	0.071	1.95642e-69	Ast_immune2	IFNGR1
8.54119e-211	0.515793	0.129	0.013	2.86455e-206	Ast_immune2	TLR2
3.45749e-37	0.514779	0.772	0.623	1.15957e-32	Ast_immune2	ABR
2.00726e-152	0.51467	0.14	0.02	6.73195e-148	Ast_immune2	CARD11
9.89059e-40	0.511896	0.421	0.249	3.31711e-35	Ast_immune2	USP15
1.37661e-153	0.509837	0.155	0.024	4.61686e-149	Ast_immune2	HCK
8.6967e-48	0.506873	0.359	0.185	2.9167e-43	Ast_immune2	RAP1A
4.02641e-14	0.506381	0.175	0.105	1.35038e-09	Ast_immune2	WARS
5.44892e-51	0.502429	0.397	0.205	1.82746e-46	Ast_immune2	ENTPD1
0	0.50211	0.143	0.009	0	Ast_immune2	IRAK3
2.48336e-28	0.501427	0.672	0.511	8.3287e-24	Ast_immune2	ETV6
1.76507e-35	0.501096	0.594	0.424	5.9197e-31	Ast_immune2	RNF213
1.64984e-211	0.498885	0.136	0.014	5.53325e-207	Ast_immune2	LRMP
4.07131e-37	0.498715	0.657	0.477	1.36543e-32	Ast_immune2	ANKRD11
1.94942e-298	0.495977	0.125	0.008	6.53797e-294	Ast_immune2	TNFRSF1B
1.45049e-56	0.495954	0.288	0.124	4.86467e-52	Ast_immune2	PLCG2
1.1064e-47	0.494933	0.297	0.14	3.71065e-43	Ast_immune2	IFI16
1.01896e-298	0.494098	0.144	0.011	3.4174e-294	Ast_immune2	PLA2G4A
3.16568e-112	0.493526	0.165	0.035	1.06171e-107	Ast_immune2	B3GNT5
1.08178e-181	0.493134	0.15	0.02	3.62807e-177	Ast_immune2	ADCY7
1.10224e-89	0.490492	0.217	0.063	3.69671e-85	Ast_immune2	GNB4
3.11812e-52	0.489344	0.341	0.165	1.04575e-47	Ast_immune2	IL6ST
0	0.485168	0.128	0.006	0	Ast_immune2	SLA
4.01678e-45	0.483605	0.288	0.137	1.34715e-40	Ast_immune2	CACNA1D
1.2531e-208	0.482941	0.101	0.008	4.20266e-204	Ast_immune2	RGS1
1.07723e-151	0.482516	0.133	0.018	3.61281e-147	Ast_immune2	MSR1
5.79742e-73	0.481814	0.225	0.075	1.94434e-68	Ast_immune2	MYOF
2.14319e-40	0.480847	0.37	0.204	7.18783e-36	Ast_immune2	USP6NL
1.57564e-29	0.47866	0.23	0.118	5.28437e-25	Ast_immune2	LRRK2
1.54544e-151	0.476882	0.137	0.019	5.18311e-147	Ast_immune2	PLD1
0	0.475653	0.131	0.005	0	Ast_immune2	CD86
6.29479e-56	0.473083	0.201	0.073	2.11115e-51	Ast_immune2	RUBCNL
1.44265e-68	0.473034	0.177	0.053	4.83836e-64	Ast_immune2	SLC2A13
4.45005e-167	0.470589	0.126	0.015	1.49246e-162	Ast_immune2	GCNT2
2.35254e-92	0.469855	0.193	0.051	7.88995e-88	Ast_immune2	SAMHD1
6.82629e-38	0.468316	0.401	0.23	2.2894e-33	Ast_immune2	RYR1
3.75276e-28	0.467639	0.696	0.559	1.2586e-23	Ast_immune2	MBNL1
4.7787e-261	0.465903	0.109	0.007	1.60268e-256	Ast_immune2	S100Z
1.3055e-150	0.465638	0.151	0.023	4.37839e-146	Ast_immune2	CDK6
3.73385e-31	0.464169	0.32	0.181	1.25226e-26	Ast_immune2	GAK
8.54945e-39	0.46046	0.443	0.267	2.86732e-34	Ast_immune2	NAIP
2.802e-43	0.458886	0.22	0.094	9.39734e-39	Ast_immune2	HIST1H2AC
0	0.455879	0.134	0.006	0	Ast_immune2	CD53
3.78421e-249	0.454946	0.116	0.009	1.26915e-244	Ast_immune2	SLC11A1
2.67967e-31	0.451574	0.49	0.324	8.98708e-27	Ast_immune2	PIAS1
1.75211e-69	0.450991	0.164	0.047	5.87623e-65	Ast_immune2	BIN1
2.08959e-150	0.450433	0.14	0.02	7.00806e-146	Ast_immune2	FAR2
1.19141e-33	0.450264	0.397	0.237	3.99574e-29	Ast_immune2	ADAM10
5.62699e-175	0.448606	0.124	0.014	1.88718e-170	Ast_immune2	CMTM7
1.06711e-87	0.444146	0.165	0.041	3.57888e-83	Ast_immune2	IL13RA1
1.40453e-27	0.442362	0.603	0.444	4.7105e-23	Ast_immune2	SNX29
1.03655e-27	0.441239	0.319	0.186	3.47639e-23	Ast_immune2	MTRNR2L12
2.98957e-51	0.441137	0.292	0.13	1.00264e-46	Ast_immune2	L3MBTL4
7.46879e-48	0.440656	0.257	0.113	2.50488e-43	Ast_immune2	NFATC2
7.82306e-34	0.438276	0.433	0.267	2.6237e-29	Ast_immune2	UVRAG
1.04293e-39	0.437821	0.284	0.141	3.49777e-35	Ast_immune2	MANBA
5.47601e-57	0.436112	0.243	0.096	1.83654e-52	Ast_immune2	CTTNBP2NL
6.70776e-109	0.43583	0.145	0.028	2.24965e-104	Ast_immune2	PIK3CD
1.07783e-214	0.435646	0.125	0.012	3.61481e-210	Ast_immune2	POU2F2
1.88978e-43	0.434084	0.249	0.113	6.33793e-39	Ast_immune2	SPTLC2
0	0.433199	0.125	0.007	0	Ast_immune2	HCLS1
7.27766e-46	0.430084	0.126	0.039	2.44078e-41	Ast_immune2	CHSY3
5.96674e-206	0.429335	0.13	0.013	2.00112e-201	Ast_immune2	SLC2A5
5.89211e-33	0.429192	0.293	0.156	1.9761e-28	Ast_immune2	MIR646HG
2.51604e-38	0.424411	0.262	0.127	8.4383e-34	Ast_immune2	PRPF38B
2.56494e-32	0.420552	0.463	0.29	8.60231e-28	Ast_immune2	ZFP36L2
5.7259e-64	0.419977	0.21	0.072	1.92035e-59	Ast_immune2	ARHGAP6
1.05283e-34	0.419816	0.281	0.146	3.53097e-30	Ast_immune2	STX7
1.37973e-40	0.417408	0.389	0.214	4.62732e-36	Ast_immune2	CHD7
2.1376e-260	0.414889	0.104	0.006	7.16907e-256	Ast_immune2	LAPTM5
3.56214e-31	0.414837	0.55	0.375	1.19467e-26	Ast_immune2	HIVEP3
5.59404e-279	0.414661	0.112	0.007	1.87613e-274	Ast_immune2	IL18
3.69059e-37	0.411983	0.258	0.127	1.23775e-32	Ast_immune2	BHLHE41
2.35956e-118	0.407564	0.123	0.019	7.91349e-114	Ast_immune2	GLDN
8.51431e-59	0.405964	0.191	0.065	2.85553e-54	Ast_immune2	NLRP1
1.71629e-28	0.404202	0.593	0.429	5.75611e-24	Ast_immune2	DIP2B
3.33552e-36	0.40412	0.874	0.762	1.11867e-31	Ast_immune2	LDLRAD4
1.74739e-48	0.403668	0.166	0.059	5.86038e-44	Ast_immune2	SERPINB9
1.28348e-37	0.403621	0.283	0.141	4.30454e-33	Ast_immune2	RASA3
2.90614e-35	0.401595	0.33	0.179	9.74662e-31	Ast_immune2	SKI
5.9731e-125	0.399644	0.117	0.017	2.00326e-120	Ast_immune2	TMEM131L
2.56155e-30	0.39956	0.462	0.298	8.59094e-26	Ast_immune2	CAPZB
3.8286e-94	0.397379	0.15	0.033	1.28404e-89	Ast_immune2	IL17RA
9.7514e-55	0.39516	0.22	0.083	3.27043e-50	Ast_immune2	STK4
2.45169e-161	0.394624	0.117	0.013	8.22247e-157	Ast_immune2	PRAM1
2.05156e-273	0.39321	0.102	0.006	6.88053e-269	Ast_immune2	LCP2
6.76645e-55	0.392205	0.174	0.059	2.26933e-50	Ast_immune2	SWAP70
6.56709e-64	0.391961	0.138	0.037	2.20247e-59	Ast_immune2	VASH1
6.96681e-40	0.391901	0.32	0.164	2.33653e-35	Ast_immune2	NCOA3
3.06084e-48	0.391894	0.174	0.063	1.02655e-43	Ast_immune2	PRKCH
1.06189e-66	0.389515	0.133	0.034	3.56135e-62	Ast_immune2	SYTL3
2.39605e-268	0.388995	0.102	0.006	8.03588e-264	Ast_immune2	SCIN
2.01666e-34	0.388865	0.341	0.189	6.76348e-30	Ast_immune2	EVL
2.78636e-305	0.388139	0.124	0.008	9.3449e-301	Ast_immune2	TFEC
3.53283e-228	0.386711	0.112	0.009	1.18484e-223	Ast_immune2	BIN2
5.17073e-53	0.385824	0.197	0.072	1.73416e-48	Ast_immune2	TRIM22
3.12314e-30	0.38535	0.351	0.206	1.04744e-25	Ast_immune2	GLS
2.21122e-23	0.383259	0.464	0.316	7.41597e-19	Ast_immune2	RB1
2.16427e-25	0.382304	0.397	0.256	7.25854e-21	Ast_immune2	ARHGAP12
9.21202e-21	0.38201	0.654	0.512	3.08953e-16	Ast_immune2	SRRM2
1.37541e-79	0.381381	0.184	0.051	4.61286e-75	Ast_immune2	GPRIN3
1.95531e-55	0.380294	0.166	0.054	6.55772e-51	Ast_immune2	MRC2
3.35918e-30	0.378743	0.35	0.205	1.1266e-25	Ast_immune2	NCK2
1.24217e-31	0.377279	0.322	0.18	4.166e-27	Ast_immune2	CDYL
9.19173e-33	0.376222	0.21	0.099	3.08272e-28	Ast_immune2	TBC1D12
9.46011e-74	0.374775	0.158	0.042	3.17273e-69	Ast_immune2	TMSB4X
1.32376e-65	0.374586	0.144	0.039	4.43963e-61	Ast_immune2	STK10
9.50904e-38	0.373785	0.252	0.12	3.18914e-33	Ast_immune2	PPARD
2.04753e-42	0.373773	0.169	0.064	6.86701e-38	Ast_immune2	KBTBD12
2.33489e-33	0.372967	0.309	0.166	7.83075e-29	Ast_immune2	WIPF1
4.71236e-21	0.372004	0.106	0.045	1.58043e-16	Ast_immune2	TNFAIP2
0	0.371279	0.101	0.003	0	Ast_immune2	PLCB2
2.17115e-24	0.370902	0.49	0.336	7.28159e-20	Ast_immune2	MGAT5
9.05327e-28	0.369763	0.655	0.485	3.03628e-23	Ast_immune2	CAMK1D
5.42955e-96	0.369716	0.104	0.017	1.82096e-91	Ast_immune2	WNT2B
1.65115e-42	0.369297	0.194	0.079	5.53762e-38	Ast_immune2	TSPAN14
1.7978e-220	0.36678	0.106	0.008	6.02945e-216	Ast_immune2	CTSC
1.85278e-26	0.3664	0.443	0.289	6.21386e-22	Ast_immune2	SETX
4.07964e-32	0.364833	0.305	0.166	1.36823e-27	Ast_immune2	CTTNBP2
1.16752e-28	0.363472	0.233	0.12	3.91563e-24	Ast_immune2	EPB41
9.81013e-25	0.362348	0.333	0.205	3.29012e-20	Ast_immune2	RNF149
1.61166e-27	0.361598	0.319	0.185	5.4052e-23	Ast_immune2	SH3BGRL
1.90992e-29	0.359727	0.241	0.124	6.40549e-25	Ast_immune2	AP1B1
1.45348e-48	0.359648	0.221	0.089	4.87469e-44	Ast_immune2	ALPK1
4.97294e-103	0.359486	0.117	0.02	1.66782e-98	Ast_immune2	CPVL
3.57708e-254	0.359392	0.107	0.007	1.19968e-249	Ast_immune2	SH3TC1
4.21197e-25	0.357647	0.469	0.316	1.41261e-20	Ast_immune2	TNRC18
5.63417e-27	0.356007	0.327	0.19	1.88959e-22	Ast_immune2	SETBP1
5.60489e-25	0.354885	0.36	0.223	1.87977e-20	Ast_immune2	DNM2
5.77796e-19	0.353841	0.379	0.256	1.93781e-14	Ast_immune2	PARP8
1.34304e-54	0.353227	0.139	0.042	4.5043e-50	Ast_immune2	P2RX4
5.70109e-33	0.352866	0.27	0.139	1.91203e-28	Ast_immune2	ZNRF2
2.64804e-22	0.35276	0.556	0.409	8.88098e-18	Ast_immune2	STAG1
1.24016e-94	0.35182	0.138	0.028	4.15926e-90	Ast_immune2	SNCA
8.19362e-26	0.349283	0.501	0.341	2.74798e-21	Ast_immune2	CEP170
1.35006e-19	0.348517	0.652	0.519	4.52783e-15	Ast_immune2	ZFHX3
2.99655e-20	0.347708	0.575	0.435	1.00498e-15	Ast_immune2	RABGAP1L
7.54894e-21	0.346348	0.493	0.349	2.53176e-16	Ast_immune2	BNC2
1.10026e-18	0.346333	0.622	0.491	3.69006e-14	Ast_immune2	SON
2.4996e-32	0.345688	0.23	0.112	8.38317e-28	Ast_immune2	RPS6KA3
2.17529e-20	0.345665	0.328	0.209	7.2955e-16	Ast_immune2	DIP2A
9.08958e-76	0.344994	0.114	0.024	3.04846e-71	Ast_immune2	ARID3A
2.98383e-19	0.344287	0.464	0.328	1.00072e-14	Ast_immune2	COMMD10
1.51806e-21	0.344154	0.393	0.258	5.09126e-17	Ast_immune2	MAN2A1
2.29835e-29	0.344134	0.179	0.083	7.70821e-25	Ast_immune2	PRDM11
7.15335e-27	0.343665	0.339	0.2	2.39909e-22	Ast_immune2	CAB39
6.64398e-113	0.343008	0.125	0.021	2.22826e-108	Ast_immune2	B4GALT1
3.34166e-26	0.342007	0.214	0.109	1.12073e-21	Ast_immune2	TMEM163
2.22626e-26	0.341377	0.453	0.296	7.46642e-22	Ast_immune2	DLEU2
2.17049e-45	0.341302	0.159	0.056	7.2794e-41	Ast_immune2	NUAK1
4.11898e-24	0.338815	0.515	0.357	1.38142e-19	Ast_immune2	KCNIP1
3.55857e-21	0.338045	0.404	0.268	1.19347e-16	Ast_immune2	TTC7A
6.58856e-29	0.336742	0.238	0.122	2.20967e-24	Ast_immune2	FNIP2
3.8174e-25	0.335342	0.35	0.213	1.28028e-20	Ast_immune2	SLC25A37
5.25159e-37	0.334166	0.176	0.073	1.76128e-32	Ast_immune2	DCP2
1.10244e-22	0.333785	0.546	0.391	3.69737e-18	Ast_immune2	TLN2
1.35473e-211	0.33307	0.101	0.008	4.54349e-207	Ast_immune2	HLA-DRB1
3.37014e-24	0.332956	0.408	0.265	1.13028e-19	Ast_immune2	ATP2C1
4.59212e-35	0.332651	0.219	0.101	1.5401e-30	Ast_immune2	IFNGR2
6.42938e-36	0.331157	0.207	0.093	2.15629e-31	Ast_immune2	RAC1
6.88767e-20	0.330294	0.142	0.07	2.30999e-15	Ast_immune2	B2M
2.87926e-107	0.328344	0.108	0.017	9.65646e-103	Ast_immune2	ARRB2
9.20314e-51	0.322446	0.117	0.033	3.08655e-46	Ast_immune2	ADAMTSL2
2.56662e-28	0.322201	0.208	0.103	8.60793e-24	Ast_immune2	AC006978.2
1.68833e-26	0.320563	0.35	0.21	5.66233e-22	Ast_immune2	CFLAR
1.37753e-32	0.320496	0.322	0.176	4.61997e-28	Ast_immune2	SIPA1L2
3.65553e-58	0.318906	0.11	0.027	1.22599e-53	Ast_immune2	LINC01091
4.30777e-26	0.317299	0.22	0.115	1.44474e-21	Ast_immune2	SKIL
4.8809e-47	0.315021	0.175	0.064	1.63696e-42	Ast_immune2	TGFB1
1.82738e-66	0.313291	0.101	0.022	6.12865e-62	Ast_immune2	C12orf75
1.39841e-19	0.312978	0.323	0.206	4.68999e-15	Ast_immune2	SMURF2
5.27217e-19	0.312579	0.673	0.545	1.76818e-14	Ast_immune2	MYCBP2
3.09745e-24	0.312434	0.364	0.226	1.03882e-19	Ast_immune2	LPIN2
5.73923e-32	0.312404	0.155	0.065	1.92482e-27	Ast_immune2	TMCC3
2.612e-19	0.312371	0.412	0.283	8.76011e-15	Ast_immune2	ITM2B
5.51951e-20	0.312197	0.243	0.142	1.85113e-15	Ast_immune2	GPCPD1
2.61465e-28	0.311627	0.214	0.107	8.76902e-24	Ast_immune2	MAP3K1
2.06228e-145	0.310928	0.107	0.013	6.91648e-141	Ast_immune2	LAT2
1.29696e-19	0.310898	0.305	0.192	4.34975e-15	Ast_immune2	ACER3
8.3318e-33	0.310828	0.185	0.082	2.79432e-28	Ast_immune2	ZC3HAV1
3.44383e-25	0.310407	0.273	0.153	1.15499e-20	Ast_immune2	ACTR2
7.32841e-25	0.308611	0.378	0.234	2.4578e-20	Ast_immune2	ELF1
1.87505e-24	0.30729	0.266	0.15	6.28853e-20	Ast_immune2	CCND3
3.719e-18	0.306815	0.474	0.343	1.24728e-13	Ast_immune2	SPRED1
5.87059e-28	0.306663	0.21	0.105	1.96888e-23	Ast_immune2	PLAGL1
8.53762e-20	0.305967	0.421	0.286	2.86335e-15	Ast_immune2	GNG7
1.43943e-31	0.303527	0.195	0.09	4.82756e-27	Ast_immune2	PAK1
2.90539e-55	0.302144	0.135	0.039	9.74408e-51	Ast_immune2	SP140
2.10895e-36	0.300962	0.101	0.032	7.07301e-32	Ast_immune2	FAM129A
9.82984e-16	0.300427	0.434	0.313	3.29673e-11	Ast_immune2	TIAM1
9.18424e-08	0.300181	0.55	0.466	0.00308021	Ast_immune2	CAMK2D
4.37919e-26	0.299527	0.162	0.075	1.46869e-21	Ast_immune2	DDX21
2.36065e-24	0.299074	0.293	0.168	7.91715e-20	Ast_immune2	ATF7IP2
3.29889e-24	0.298964	0.312	0.183	1.10638e-19	Ast_immune2	PHF20
6.36262e-35	0.297822	0.192	0.084	2.1339e-30	Ast_immune2	CARD8
3.38669e-18	0.297008	0.18	0.099	1.13583e-13	Ast_immune2	EML1
1.58389e-24	0.295934	0.205	0.106	5.31204e-20	Ast_immune2	MAN1A1
2.36679e-32	0.294456	0.152	0.062	7.93774e-28	Ast_immune2	GRK5
6.61123e-31	0.293417	0.255	0.129	2.21728e-26	Ast_immune2	DNAJC5
9.23012e-18	0.290624	0.31	0.199	3.0956e-13	Ast_immune2	XKR6
8.47054e-33	0.289363	0.193	0.087	2.84085e-28	Ast_immune2	ADAP2
1.4606e-16	0.28868	0.343	0.23	4.89857e-12	Ast_immune2	ARHGAP35
2.50247e-22	0.287668	0.22	0.12	8.3928e-18	Ast_immune2	ATP11C
1.63809e-24	0.286909	0.148	0.068	5.49383e-20	Ast_immune2	KCNQ5
1.31905e-47	0.285444	0.142	0.046	4.42383e-43	Ast_immune2	FAM102B
4.73703e-20	0.284443	0.204	0.113	1.58871e-15	Ast_immune2	CRLF3
5.34863e-23	0.283006	0.248	0.138	1.79382e-18	Ast_immune2	PLEKHA2
2.99059e-23	0.282842	0.267	0.152	1.00298e-18	Ast_immune2	ARHGAP17
1.12452e-52	0.281557	0.134	0.04	3.77141e-48	Ast_immune2	SEPT6
4.39035e-44	0.281523	0.163	0.059	1.47244e-39	Ast_immune2	APMAP
1.01437e-11	0.281446	0.519	0.405	3.40199e-07	Ast_immune2	PCNX1
8.56786e-23	0.281284	0.203	0.107	2.87349e-18	Ast_immune2	ST3GAL1
3.51929e-22	0.280721	0.302	0.182	1.1803e-17	Ast_immune2	SSH1
9.7895e-34	0.280093	0.184	0.08	3.2832e-29	Ast_immune2	PTBP3
1.12777e-38	0.279647	0.152	0.057	3.78232e-34	Ast_immune2	APAF1
3.35247e-17	0.279562	0.304	0.196	1.12435e-12	Ast_immune2	USP25
3.05029e-14	0.279516	0.526	0.401	1.02301e-09	Ast_immune2	RASSF8
5.24048e-42	0.279451	0.126	0.041	1.75755e-37	Ast_immune2	PLEKHO1
1.61328e-14	0.278971	0.477	0.358	5.41063e-10	Ast_immune2	PAN3
6.612e-59	0.278785	0.114	0.028	2.21753e-54	Ast_immune2	DAGLB
7.72668e-15	0.278282	0.333	0.228	2.59138e-10	Ast_immune2	GNA13
4.54988e-16	0.277502	0.431	0.306	1.52594e-11	Ast_immune2	ANKS1A
9.57559e-15	0.277014	0.568	0.436	3.21146e-10	Ast_immune2	SPIDR
3.24368e-17	0.276756	0.21	0.124	1.08786e-12	Ast_immune2	MAP3K3
3.60293e-41	0.274198	0.139	0.048	1.20835e-36	Ast_immune2	RASSF3
5.59529e-15	0.27413	0.455	0.335	1.87655e-10	Ast_immune2	PIP4K2A
4.62816e-17	0.273497	0.479	0.34	1.55219e-12	Ast_immune2	TNS3
7.66287e-23	0.273417	0.229	0.125	2.56997e-18	Ast_immune2	ZNF846
2.24681e-18	0.273394	0.264	0.162	7.53536e-14	Ast_immune2	MKNK1
2.12457e-33	0.272182	0.159	0.065	7.12538e-29	Ast_immune2	HAVCR2
2.52591e-43	0.270871	0.168	0.063	8.4714e-39	Ast_immune2	REL
3.46816e-18	0.269775	0.253	0.153	1.16315e-13	Ast_immune2	PTPN2
2.96496e-12	0.269672	0.512	0.394	9.94389e-08	Ast_immune2	PRRC2C
1.366e-15	0.269558	0.422	0.3	4.58128e-11	Ast_immune2	PUM2
8.15092e-16	0.269469	0.603	0.468	2.73365e-11	Ast_immune2	ZFP36L1
7.35087e-20	0.269065	0.262	0.155	2.46533e-15	Ast_immune2	SEMA4D
3.32021e-21	0.26853	0.204	0.11	1.11353e-16	Ast_immune2	NXN
3.11205e-23	0.268033	0.158	0.076	1.04372e-18	Ast_immune2	BASP1
4.86312e-30	0.26786	0.158	0.068	1.63099e-25	Ast_immune2	NOL4L
5.79545e-11	0.267773	0.468	0.365	1.94368e-06	Ast_immune2	APPL2
6.63201e-07	0.267744	0.759	0.69	0.0222424	Ast_immune2	SMYD3
4.38469e-56	0.266455	0.103	0.025	1.47054e-51	Ast_immune2	RASSF2
4.96052e-17	0.266147	0.357	0.239	1.66366e-12	Ast_immune2	USP24
6.52664e-14	0.265941	0.156	0.089	2.1889e-09	Ast_immune2	EDA
4.46696e-23	0.264415	0.21	0.111	1.49813e-18	Ast_immune2	ERICH1
7.64997e-14	0.264382	0.523	0.397	2.56565e-09	Ast_immune2	TCF25
5.37179e-19	0.263009	0.387	0.257	1.80159e-14	Ast_immune2	RSRC1
4.02062e-12	0.26255	0.363	0.26	1.34843e-07	Ast_immune2	PDSS2
8.08731e-25	0.262259	0.285	0.162	2.71232e-20	Ast_immune2	ATP11A
5.89341e-15	0.262112	0.242	0.152	1.97653e-10	Ast_immune2	PLCL1
1.73159e-16	0.261692	0.425	0.298	5.80739e-12	Ast_immune2	HSPA1A
3.2107e-23	0.261273	0.2	0.104	1.0768e-18	Ast_immune2	KIAA1551
1.26482e-14	0.260995	0.283	0.186	4.24196e-10	Ast_immune2	CWF19L2
1.4704e-15	0.260933	0.229	0.14	4.93144e-11	Ast_immune2	STK17A
5.95773e-15	0.260767	0.299	0.196	1.9981e-10	Ast_immune2	ZNF652
2.8331e-25	0.260505	0.219	0.113	9.50164e-21	Ast_immune2	NRIP1
1.78933e-19	0.260039	0.246	0.144	6.00107e-15	Ast_immune2	TBC1D14
4.14168e-15	0.260033	0.655	0.535	1.38904e-10	Ast_immune2	HSP90AA1
9.17729e-21	0.259626	0.168	0.086	3.07788e-16	Ast_immune2	ELK3
1.31988e-11	0.259323	0.397	0.296	4.42662e-07	Ast_immune2	MERTK
3.91373e-19	0.257967	0.258	0.155	1.31259e-14	Ast_immune2	CNTRL
9.2827e-23	0.257435	0.287	0.167	3.11323e-18	Ast_immune2	OSBPL3
3.33033e-18	0.257243	0.383	0.256	1.11693e-13	Ast_immune2	CDC42SE2
1.71684e-15	0.257147	0.217	0.132	5.75795e-11	Ast_immune2	PARP4
1.57224e-14	0.25712	0.362	0.253	5.27296e-10	Ast_immune2	FUS
1.09447e-19	0.256418	0.273	0.163	3.67065e-15	Ast_immune2	TPK1
2.51608e-14	0.256275	0.315	0.211	8.43842e-10	Ast_immune2	PRPF4B
4.13727e-24	0.256153	0.136	0.061	1.38756e-19	Ast_immune2	VRK2
1.23565e-14	0.255158	0.418	0.296	4.14411e-10	Ast_immune2	ITSN2
1.62084e-23	0.254929	0.257	0.144	5.43598e-19	Ast_immune2	ALG13
1.00491e-13	0.254876	0.354	0.249	3.37025e-09	Ast_immune2	LARP4B
1.0043e-13	0.25415	0.746	0.657	3.36823e-09	Ast_immune2	ZFAND3
1.46923e-30	0.253934	0.149	0.062	4.92749e-26	Ast_immune2	TIMP2
1.23271e-21	0.253773	0.247	0.14	4.13427e-17	Ast_immune2	CBL
9.38949e-16	0.25198	0.323	0.215	3.14905e-11	Ast_immune2	UPF2
3.38307e-52	0.251878	0.108	0.028	1.13461e-47	Ast_immune2	GLCE
8.56765e-20	0.251848	0.222	0.127	2.87342e-15	Ast_immune2	PABPC1
1.9054e-16	0.251278	0.78	0.677	6.39033e-12	Ast_immune2	MED13L
1.43605e-22	0.250367	0.272	0.157	4.81622e-18	Ast_immune2	PHC2
2.72563e-17	0.250234	0.309	0.199	9.14121e-13	Ast_immune2	RAP1B
