# Supplementary material for: Single-nucleus RNA sequencing of midbrain blood-brain barrier cells in schizophrenia reveals subtle transcriptional changes with overall preservation of cellular proportions and phenotypes
Source: Mol Psychiatry. 2022 Oct 3;27(11):4731–40. doi: 10.1038/s41380-022-01796-0 (PMC9734060; doi:10.1038/s41380-022-01796-0)
Supplement: Supplementary file 6 — Supplementary Table 6 [file 41380_2022_1796_MOESM6_ESM.xlsx]

## Sheet: Astrocytes
cluster	primerid	Pr..Chisq.	coef	ci.hi	ci.lo	fdr
Astrocytes	CTNNA2	0.00118381	-0.370461	-0.158949	-0.581972	0.0947046
Astrocytes	ANKDD1A	0.00300653	-0.230718	-0.0843716	-0.377064	0.120261
Astrocytes	BMPR1B	0.00823339	0.193908	0.319528	0.0682887	0.131734
Astrocytes	DPY19L1	0.00787022	0.100024	0.161278	0.03877	0.131734
Astrocytes	PLEKHA5	0.00667715	0.249728	0.414074	0.0853819	0.131734
Astrocytes	CNTNAP3B	0.0241549	0.21193	0.356368	0.0674918	0.13485
Astrocytes	COLEC12	0.0230933	0.233751	0.391993	0.0755084	0.13485
Astrocytes	DTNA	0.0252844	0.206809	0.386547	0.0270705	0.13485
Astrocytes	GRM5	0.0164998	-0.156051	-0.0278374	-0.284265	0.13485
Astrocytes	JUN	0.0177398	-0.217006	-0.0542331	-0.379778	0.13485
Astrocytes	LCNL1	0.0133848	-0.138199	-0.0430796	-0.233317	0.13485
Astrocytes	NDRG2	0.0244566	-0.255572	-0.0138768	-0.497267	0.13485
Astrocytes	NSMF	0.0188159	-0.136573	-0.0384338	-0.234712	0.13485
Astrocytes	SHISA9	0.0192303	0.238438	0.405245	0.0716322	0.13485
Astrocytes	TOGARAM2	0.0235417	-0.269919	0.0229881	-0.562826	0.13485
Astrocytes	KNDC1	0.029701	-0.234003	0.0421918	-0.510198	0.148505
Astrocytes	COL16A1	0.034145	-0.12539	-0.0151789	-0.235601	0.160682
Astrocytes	HIP1R	0.0452877	-0.195038	0.00409228	-0.394169	0.164465
Astrocytes	LPP	0.0440235	0.190164	0.345759	0.034568	0.164465
Astrocytes	MAOB	0.0467756	0.121058	0.214517	0.0275991	0.164465
Astrocytes	MT3	0.0385859	-0.152013	-0.0232177	-0.280809	0.164465
Astrocytes	NWD1	0.0466151	-0.119908	0.0216771	-0.261493	0.164465
Astrocytes	TMEM108	0.0472838	-0.177909	-0.00435168	-0.351466	0.164465
Astrocytes	AC092691.1	0.0608161	0.173093	0.325458	0.0207273	0.195829
Astrocytes	GINS3	0.0611965	-0.265164	0.0221523	-0.55248	0.195829
Astrocytes	MT-CO1	0.0653223	-0.155642	-0.0273162	-0.283967	0.200992
Astrocytes	DAAM2	0.0771432	-0.22277	0.00133751	-0.446878	0.202868
Astrocytes	FP671120.1	0.0687993	-0.257202	-0.00993994	-0.504464	0.202868
Astrocytes	LINC00486	0.0790737	-0.128505	0.000930491	-0.25794	0.202868
Astrocytes	PSD2	0.0832571	-0.227427	0.0500445	-0.504898	0.202868
Astrocytes	SNRNP70	0.0801937	-0.153003	-0.0184104	-0.287595	0.202868
Astrocytes	TMTC1	0.0836831	0.12985	0.241342	0.0183582	0.202868
Astrocytes	TPD52L1	0.0781107	0.113935	0.209313	0.0185572	0.202868
Astrocytes	PLEKHA6	0.0907002	-0.144904	0.0487948	-0.338602	0.213412
Astrocytes	ERBIN	0.0991404	0.136325	0.257702	0.0149476	0.222658
Astrocytes	LRP1B	0.100196	0.133046	0.262195	0.00389664	0.222658
Astrocytes	HSPA1A	0.103962	-0.198195	0.0262491	-0.422639	0.224783
Astrocytes	C1orf61	0.10869	-0.231373	0.00469119	-0.467437	0.225122
Astrocytes	HSP90AA1	0.109747	-0.255105	-0.0227663	-0.487444	0.225122
Astrocytes	FRMD5	0.11477	0.163849	0.315224	0.0124748	0.226193
Astrocytes	HIF1A	0.118751	0.162952	0.315086	0.0108176	0.226193
Astrocytes	WWTR1	0.117435	0.135971	0.267238	0.00470317	0.226193
Astrocytes	AQP1	0.126869	0.108457	0.210261	0.00665219	0.230672
Astrocytes	FGFR3	0.124376	-0.143245	0.0528676	-0.339357	0.230672
Astrocytes	DNER	0.134245	0.19134	0.379833	0.00284587	0.238657
Astrocytes	CACNA1C	0.139549	0.140769	0.280831	0.000707375	0.242694
Astrocytes	MGST1	0.147144	0.166704	0.329014	0.00439391	0.250458
Astrocytes	MAPRE2	0.177366	0.144827	0.294611	-0.0049557	0.29561
Astrocytes	SRRM2	0.184506	-0.170361	0.0287579	-0.36948	0.301235
Astrocytes	LRFN5	0.19489	0.105548	0.220487	-0.00938953	0.311824
Astrocytes	FP236383.1	0.209334	-0.228156	0.0722912	-0.528602	0.328368
Astrocytes	NRCAM	0.225526	0.115584	0.286916	-0.0557476	0.340417
Astrocytes	TRIO	0.224553	0.163297	0.358995	-0.0324009	0.340417
Astrocytes	SYT1	0.241166	-0.122478	0.0499556	-0.294912	0.357284
Astrocytes	MYO1E	0.249807	0.0888291	0.193967	-0.016309	0.363356
Astrocytes	ADAMTS9-AS2	0.264819	0.163123	0.356126	-0.0298791	0.378312
Astrocytes	SPOCK1	0.284813	0.137992	0.305306	-0.0293217	0.399737
Astrocytes	KCND3	0.312993	0.0660937	0.157846	-0.0256586	0.431714
Astrocytes	CNTNAP2	0.397418	-0.0572417	0.0676968	-0.18218	0.538872
Astrocytes	MKL2	0.413914	0.0613273	0.166201	-0.0435463	0.551885
Astrocytes	CACNA2D3	0.46983	0.152007	0.419075	-0.115061	0.587287
Astrocytes	CD44	0.45936	0.214201	0.544413	-0.116012	0.587287
Astrocytes	IRS2	0.467485	0.055914	0.149159	-0.0373311	0.587287
Astrocytes	KCNIP4	0.464235	-0.0775298	0.07126	-0.22632	0.587287
Astrocytes	CAMK2G	0.481374	-0.167076	0.130815	-0.464967	0.59246
Astrocytes	PDE4B	0.491694	0.0971135	0.260962	-0.0667347	0.595992
Astrocytes	ADAM12	0.538627	0.0562819	0.163189	-0.0506247	0.636381
Astrocytes	ARHGEF3	0.544677	0.114213	0.315388	-0.0869621	0.636381
Astrocytes	GALNT2	0.548879	0.070837	0.20665	-0.0649762	0.636381
Astrocytes	GPR158	0.570325	0.111457	0.323788	-0.100873	0.6518
Astrocytes	TPST1	0.615417	0.152022	0.450809	-0.146765	0.693428
Astrocytes	ELL2	0.648127	0.11781	0.380062	-0.144442	0.720141
Astrocytes	MMD2	0.671474	-0.0676543	0.184214	-0.319522	0.735862
Astrocytes	AHCYL1	0.753636	0.0883379	0.332409	-0.155733	0.809413
Astrocytes	SLC39A14	0.758825	0.0291639	0.169024	-0.110696	0.809413
Astrocytes	CADPS	0.81011	0.132623	0.532317	-0.267071	0.841672
Astrocytes	F3	0.804576	0.0718752	0.297504	-0.153753	0.841672
Astrocytes	GLIS3	0.872282	0.0488346	0.282321	-0.184652	0.88467
Astrocytes	MAN1C1	0.873612	0.0416892	0.203571	-0.120192	0.88467
Astrocytes	ZFYVE28	0.929849	0.0215029	0.170365	-0.127359	0.929849

## Sheet: Endothelial
cluster	primerid	Pr..Chisq.	coef	ci.hi	ci.lo	fdr
Endothelial	HNRNPA2B1	4.94282e-05	-0.313716	-0.196363	-0.431068	0.00780965
Endothelial	CMTM8	0.00436621	0.259778	0.463487	0.0560688	0.069516
Endothelial	FBXW7	0.00208873	0.158928	0.30123	0.0166258	0.069516
Endothelial	FOXO3	0.0036358	0.213518	0.339699	0.0873364	0.069516
Endothelial	HIVEP2	0.00297302	-0.204556	-0.0637387	-0.345373	0.069516
Endothelial	ICA1	0.00275601	0.211364	0.312645	0.110083	0.069516
Endothelial	RTN1	0.00439974	-0.215409	-0.0911485	-0.339669	0.069516
Endothelial	SAT1	0.00406359	-0.362603	-0.070888	-0.654318	0.069516
Endothelial	SMAD6	0.00236365	0.330889	0.582476	0.0793026	0.069516
Endothelial	VOPP1	0.00365163	0.166892	0.269235	0.0645483	0.069516
Endothelial	ADD1	0.00779914	0.321609	0.548465	0.0947521	0.112024
Endothelial	ACER2	0.0268568	-0.199627	-0.0400774	-0.359177	0.153365
Endothelial	B2M	0.0329013	-0.280348	-0.0269298	-0.533766	0.153365
Endothelial	CAMKMT	0.0324772	0.126751	0.271915	-0.0184127	0.153365
Endothelial	CNTNAP3B	0.0252227	0.37411	0.647557	0.100663	0.153365
Endothelial	DDX5	0.0294487	-0.245713	-0.0680024	-0.423424	0.153365
Endothelial	EPHA3	0.0286733	0.110169	0.2776	-0.0572612	0.153365
Endothelial	FAM172A	0.0203215	0.21377	0.350984	0.0765565	0.153365
Endothelial	FAT4	0.0165282	0.209253	0.334991	0.0835139	0.153365
Endothelial	GPBP1	0.026867	-0.17619	-0.0537592	-0.298621	0.153365
Endothelial	HIF3A	0.0332033	0.220088	0.494347	-0.0541706	0.153365
Endothelial	HIVEP1	0.0312568	0.222271	0.408163	0.0363789	0.153365
Endothelial	KALRN	0.0255329	0.258441	0.456433	0.0604491	0.153365
Endothelial	KCTD8	0.0249202	0.231209	0.420382	0.0420371	0.153365
Endothelial	MNAT1	0.0238644	0.175588	0.295574	0.055602	0.153365
Endothelial	PAPSS2	0.0339734	0.157766	0.309078	0.00645424	0.153365
Endothelial	PKP4	0.0244001	0.275708	0.47172	0.079697	0.153365
Endothelial	PON2	0.0298806	0.209462	0.399773	0.0191512	0.153365
Endothelial	REV3L	0.016034	0.168232	0.284628	0.0518364	0.153365
Endothelial	SLFN12L	0.0221029	-0.188597	-0.0463137	-0.33088	0.153365
Endothelial	SPARCL1	0.0310207	0.33135	0.581775	0.0809254	0.153365
Endothelial	SUMF1	0.0164579	0.184634	0.309283	0.0599861	0.153365
Endothelial	THSD4	0.0213179	0.328837	0.558801	0.0988726	0.153365
Endothelial	TMTC1	0.032289	0.214536	0.381203	0.0478683	0.153365
Endothelial	UBC	0.0191757	-0.356647	-0.124948	-0.588346	0.153365
Endothelial	FNBP1L	0.0376919	0.0980387	0.210595	-0.0145173	0.155531
Endothelial	KANSL1	0.0393748	-0.353745	-0.0911438	-0.616345	0.155531
Endothelial	NET1	0.0379837	0.109585	0.279364	-0.0601941	0.155531
Endothelial	RPS6KA2	0.0389277	0.260671	0.509564	0.0117778	0.155531
Endothelial	TFCP2	0.0382699	0.138818	0.238911	0.0387251	0.155531
Endothelial	THSD7A	0.0405853	0.14972	0.387301	-0.0878607	0.156402
Endothelial	PALMD	0.0429875	0.256572	0.473997	0.039147	0.161715
Endothelial	IL1R1	0.0441451	0.274724	0.495424	0.0540236	0.162208
Endothelial	ARHGAP31	0.0501968	0.154183	0.394946	-0.0865797	0.162882
Endothelial	ELF2	0.0504481	0.204205	0.366258	0.0421515	0.162882
Endothelial	SLC12A2	0.0501218	0.0993957	0.275393	-0.0766016	0.162882
Endothelial	SORBS2	0.0481466	0.31029	0.588376	0.0322031	0.162882
Endothelial	TRA2B	0.0478552	-0.163443	-0.04044	-0.286446	0.162882
Endothelial	ZNF366	0.0505141	0.110934	0.251015	-0.0291475	0.162882
Endothelial	ITGA1	0.0518747	0.218128	0.40228	0.0339762	0.163924
Endothelial	ELOVL7	0.0547211	0.237102	0.430688	0.043515	0.169528
Endothelial	ADK	0.0599752	0.16434	0.298326	0.0303542	0.173259
Endothelial	AFF3	0.060829	0.36027	0.682564	0.0379766	0.173259
Endothelial	PARD3B	0.0573313	0.196268	0.347168	0.0453675	0.173259
Endothelial	PHF14	0.0603074	0.156796	0.279576	0.0340159	0.173259
Endothelial	STXBP5	0.0614081	0.0919567	0.195693	-0.0117801	0.173259
Endothelial	NEAT1	0.0642988	-0.220248	-0.0099474	-0.430549	0.178232
Endothelial	DNAJB6	0.0669208	-0.163202	-0.0272362	-0.299167	0.178496
Endothelial	MAP3K20	0.0661501	0.038138	0.149881	-0.0736047	0.178496
Endothelial	RASAL2	0.0685962	0.245081	0.475902	0.0142609	0.178496
Endothelial	SMCHD1	0.068913	-0.206957	-0.0266494	-0.387265	0.178496
Endothelial	AFF4	0.0725909	-0.168003	-0.0284627	-0.307544	0.18499
Endothelial	SLC19A3	0.0751817	0.111996	0.25996	-0.0359673	0.188551
Endothelial	HIP1	0.0790532	0.106409	0.273921	-0.0611018	0.195163
Endothelial	CPQ	0.0884738	0.0786024	0.183586	-0.0263811	0.20864
Endothelial	EPSTI1	0.0884528	-0.242239	-0.0104437	-0.474035	0.20864
Endothelial	MTRNR2L12	0.0877294	-0.269009	-0.0158209	-0.522197	0.20864
Endothelial	IL4R	0.0916714	0.336522	0.6288	0.0442443	0.213001
Endothelial	TBC1D4	0.103944	0.235063	0.547497	-0.0773698	0.238017
Endothelial	GRK5	0.106762	0.23645	0.459858	0.0130426	0.240977
Endothelial	HECTD4	0.113476	0.120853	0.23371	0.00799622	0.251594
Endothelial	HSPH1	0.11465	-0.19383	0.0487162	-0.436376	0.251594
Endothelial	CCDC85A	0.118937	0.19717	0.401288	-0.00694812	0.251814
Endothelial	CCNL1	0.121207	-0.214227	-0.0183175	-0.410136	0.251814
Endothelial	ITIH5	0.122719	-0.187505	0.00675512	-0.381764	0.251814
Endothelial	MKL2	0.121366	0.239371	0.469685	0.00905756	0.251814
Endothelial	SQSTM1	0.120225	-0.145654	0.0588778	-0.350187	0.251814
Endothelial	CACNA1C	0.125814	0.144869	0.302907	-0.0131683	0.252417
Endothelial	GALNT15	0.127806	0.166986	0.338519	-0.00454638	0.252417
Endothelial	RNF213	0.126666	-0.230163	-0.00529911	-0.455027	0.252417
Endothelial	PTGES3	0.135158	-0.12829	0.0212065	-0.277786	0.263642
Endothelial	NR3C2	0.139065	0.136706	0.371137	-0.0977247	0.267955
Endothelial	DDX60L	0.149293	-0.165029	0.021886	-0.351944	0.284195
Endothelial	BMP6	0.158487	0.158723	0.313815	0.00362998	0.291175
Endothelial	DLEU2	0.155576	0.0793318	0.301237	-0.142573	0.291175
Endothelial	HSPA1A	0.156753	-0.267876	0.060023	-0.595776	0.291175
Endothelial	MAST4	0.163814	-0.269012	0.0159634	-0.553987	0.29412
Endothelial	WTAP	0.163609	-0.131132	0.00321338	-0.265478	0.29412
Endothelial	AC092957.1	0.17017	-0.120191	0.199793	-0.440175	0.29546
Endothelial	FOXP1	0.168711	0.0905302	0.302118	-0.121057	0.29546
Endothelial	HLA-B	0.168036	-0.160695	0.00377515	-0.325165	0.29546
Endothelial	RPGR	0.179101	0.140139	0.427978	-0.147699	0.307587
Endothelial	MAML3	0.182275	0.0265647	0.25649	-0.20336	0.309671
Endothelial	MX1	0.193085	-0.144027	0.0385795	-0.326633	0.324547
Endothelial	ZBTB16	0.197392	0.310582	0.744892	-0.123729	0.328295
Endothelial	XAF1	0.208123	-0.193404	0.0916234	-0.478431	0.342536
Endothelial	HSP90AB1	0.213478	-0.124199	0.0599732	-0.308371	0.347727
Endothelial	B4GALT1	0.22302	-0.0865757	0.0552783	-0.22843	0.359562
Endothelial	HLA-E	0.228304	-0.175721	0.0333792	-0.384821	0.36072
Endothelial	MYRIP	0.226922	0.2373	0.532774	-0.0581736	0.36072
Endothelial	LAMA2	0.238779	0.107656	0.258756	-0.0434442	0.373536
Endothelial	ZC3HAV1	0.249943	-0.112557	0.0358308	-0.260945	0.387166
Endothelial	CALM1	0.265427	-0.128587	0.0268059	-0.28398	0.392623
Endothelial	FTH1	0.26267	-0.116636	0.047278	-0.280549	0.392623
Endothelial	HSP90AA1	0.258635	-0.231943	0.100307	-0.564193	0.392623
Endothelial	PRELID2	0.26589	-0.043527	0.185998	-0.273052	0.392623
Endothelial	SP100	0.256223	-0.174282	0.035723	-0.384287	0.392623
Endothelial	CNOT6L	0.284149	-0.0949362	0.0759041	-0.265777	0.4157
Endothelial	IFI27	0.287217	-0.105719	0.0366344	-0.248072	0.416334
Endothelial	CREM	0.299233	-0.137594	0.0573497	-0.332539	0.429807
Endothelial	ABCB1	0.30654	0.186013	0.433758	-0.0617312	0.436336
Endothelial	MT2A	0.313803	-0.220662	0.209607	-0.650931	0.442686
Endothelial	IFI44L	0.322637	-0.172991	0.104907	-0.45089	0.451121
Endothelial	FN1	0.326553	-0.144709	0.0481446	-0.337564	0.452591
Endothelial	CEMIP2	0.357857	-0.077522	0.0970623	-0.252106	0.491665
Endothelial	HLF	0.360996	0.0597127	0.338175	-0.218749	0.491701
Endothelial	KAZN	0.366018	-0.328442	0.117179	-0.774063	0.49428
Endothelial	RFX3	0.369446	0.0750134	0.266309	-0.116282	0.494682
Endothelial	FP671120.1	0.412259	-0.201146	0.118133	-0.520425	0.54737
Endothelial	AC013394.1	0.44316	-0.0607092	0.0927254	-0.214144	0.579012
Endothelial	RAPGEF5	0.443566	-0.0816509	0.130592	-0.293894	0.579012
Endothelial	SNED1	0.447085	0.170077	0.444865	-0.10471	0.579012
Endothelial	ELL2	0.466876	-0.00648085	0.249175	-0.262136	0.580838
Endothelial	FAM155A	0.452381	0.109476	0.422372	-0.20342	0.580838
Endothelial	PELI2	0.465183	0.11021	0.289136	-0.0687157	0.580838
Endothelial	RIMKLB	0.46008	-0.168549	0.147449	-0.484548	0.580838
Endothelial	ZNF521	0.456374	0.0972717	0.245584	-0.051041	0.580838
Endothelial	TACC1	0.48312	0.054258	0.363197	-0.254682	0.596351
Endothelial	DENND3	0.509101	-0.131819	0.10527	-0.368909	0.62355
Endothelial	PLSCR1	0.514816	-0.106223	0.105681	-0.318127	0.625699
Endothelial	LINC02147	0.521363	0.0544475	0.256832	-0.147937	0.626149
Endothelial	XIST	0.523112	-2.48055e-05	0.000141336	-0.000190948	0.626149
Endothelial	NFKBIA	0.536696	-0.110209	0.121503	-0.341921	0.637579
Endothelial	HLA-A	0.542856	-0.0887645	0.0969425	-0.274472	0.640083
Endothelial	SRGN	0.56029	-0.0922118	0.138639	-0.323063	0.655747
Endothelial	LDB2	0.60509	0.0571619	0.349401	-0.235077	0.700285
Endothelial	PARP14	0.607209	-0.103602	0.183438	-0.390641	0.700285
Endothelial	BACE2	0.616272	-0.108321	0.121388	-0.33803	0.705587
Endothelial	SRRM2	0.635414	-0.0755642	0.140281	-0.29141	0.722269
Endothelial	BSG	0.656954	-0.0595389	0.219909	-0.338987	0.74142
Endothelial	HIF1A	0.68838	-0.0705684	0.120351	-0.261488	0.771376
Endothelial	HSPA1B	0.696117	-0.0934298	0.142405	-0.329265	0.774553
Endothelial	PLEKHG1	0.737453	-0.133829	0.209489	-0.477147	0.814808
Endothelial	EMP2	0.75088	-0.0557268	0.0923063	-0.20376	0.821128
Endothelial	ESYT2	0.758764	-0.0906124	0.167626	-0.348851	0.821128
Endothelial	JUN	0.756319	-0.0704563	0.188355	-0.329268	0.821128
Endothelial	APOLD1	0.806314	-0.0383164	0.309342	-0.385975	0.860795
Endothelial	GRASP	0.805095	-0.0112161	0.19266	-0.215093	0.860795
Endothelial	CFH	0.812802	-0.000755068	0.229127	-0.230637	0.861897
Endothelial	DUSP1	0.840325	-0.0638729	0.186478	-0.314223	0.879281
Endothelial	MYO1E	0.834916	-0.0680447	0.152847	-0.288937	0.879281
Endothelial	NAMPT	0.903628	-0.0554804	0.184914	-0.295874	0.935644
Endothelial	PTMA	0.908282	-0.010855	0.23008	-0.25179	0.935644
Endothelial	SORT1	0.911957	-0.0440305	0.268497	-0.356558	0.935644
Endothelial	CCSER1	0.925959	0.0210971	0.212729	-0.170535	0.937831
Endothelial	FLT1	0.920393	-0.0706144	0.275562	-0.416791	0.937831
Endothelial	NR4A1	0.953425	0.0320284	0.519714	-0.455657	0.953425
Endothelial	TMSB10	0.948993	-0.0421925	0.226742	-0.311127	0.953425

## Sheet: Ependymal
cluster	primerid	Pr..Chisq.	coef	ci.hi	ci.lo	fdr
Ependymal	EML6	4.30377e-06	0.339085	0.445667	0.232502	0.00131265
Ependymal	CDS1	3.2439e-05	0.172272	0.24337	0.101174	0.00494695
Ependymal	AC018467.1	0.000388329	0.161927	0.276116	0.0477388	0.0186108
Ependymal	ARHGAP21	0.000447645	0.220873	0.371375	0.0703715	0.0186108
Ependymal	INTS6L	0.000488152	0.118014	0.189705	0.0463225	0.0186108
Ependymal	KIF27	0.000357473	0.212339	0.317501	0.107177	0.0186108
Ependymal	RALGPS2	0.000333337	0.145785	0.265545	0.0260257	0.0186108
Ependymal	TTC23L	0.000199637	0.238855	0.361765	0.115945	0.0186108
Ependymal	C1orf158	0.000878101	0.202152	0.292106	0.112197	0.0206016
Ependymal	C1orf87	0.000779284	0.235605	0.373894	0.0973162	0.0206016
Ependymal	NEK10	0.000819408	0.298063	0.524905	0.0712209	0.0206016
Ependymal	SPATA6	0.000658278	0.173325	0.323046	0.0236031	0.0206016
Ependymal	STK33	0.000765743	0.245731	0.357861	0.1336	0.0206016
Ependymal	AF165147.1	0.00132649	0.11197	0.214921	0.00901977	0.0288984
Ependymal	LMNTD1	0.00176892	0.402265	0.63088	0.173649	0.0359681
Ependymal	AC090001.1	0.00250764	0.108248	0.208414	0.0080825	0.0382415
Ependymal	DSE	0.00224922	0.159232	0.303413	0.0150517	0.0382415
Ependymal	FOXP2	0.00231538	0.321054	0.542592	0.0995158	0.0382415
Ependymal	LRRC6	0.0020215	0.231021	0.353423	0.108619	0.0382415
Ependymal	PDE4D	0.00240739	-0.395172	-0.154021	-0.636323	0.0382415
Ependymal	AC013470.2	0.00278334	0.281997	0.517902	0.0460924	0.0404247
Ependymal	TMEM163	0.00329471	0.223216	0.350793	0.0956379	0.0456766
Ependymal	GULP1	0.00452315	0.149432	0.249392	0.049472	0.0599809
Ependymal	CPEB3	0.00576094	-0.149495	-0.0478654	-0.251124	0.0637362
Ependymal	GRM5	0.00524187	-0.228271	-0.0987931	-0.357749	0.0637362
Ependymal	KIF6	0.00515023	0.259912	0.444481	0.075342	0.0637362
Ependymal	MAPKBP1	0.00585119	0.112216	0.179435	0.0449967	0.0637362
Ependymal	UBE3D	0.00563396	0.388522	0.618997	0.158046	0.0637362
Ependymal	DOCK5	0.00699508	0.228158	0.362325	0.0939909	0.0711166
Ependymal	SLC1A2	0.00699115	-0.370515	-0.163122	-0.577907	0.0711166
Ependymal	ANKS1B	0.00746871	0.25914	0.426204	0.092076	0.0711861
Ependymal	SAXO2	0.0072967	0.0934264	0.175764	0.0110893	0.0711861
Ependymal	AC104596.1	0.00875108	0.116133	0.256778	-0.0245119	0.0741411
Ependymal	CD36	0.00841767	0.205599	0.464101	-0.0529022	0.0741411
Ependymal	WDR63	0.00862713	0.230686	0.382765	0.0786075	0.0741411
Ependymal	ZEB2	0.00848319	0.0904801	0.177682	0.00327846	0.0741411
Ependymal	AC007563.2	0.0106129	0.177204	0.328103	0.0263053	0.0771416
Ependymal	ADGB	0.00948358	0.385876	0.635593	0.13616	0.0771416
Ependymal	ARMC4	0.0109462	0.307038	0.503816	0.11026	0.0771416
Ependymal	DCDC2	0.00975571	0.233175	0.408761	0.0575885	0.0771416
Ependymal	FANK1	0.0111286	0.263778	0.448253	0.0793035	0.0771416
Ependymal	LRRIQ1	0.0104332	0.23268	0.373953	0.0914068	0.0771416
Ependymal	RGS22	0.010003	0.229104	0.387347	0.0708604	0.0771416
Ependymal	SPEF2	0.0107274	0.262658	0.433946	0.0913698	0.0771416
Ependymal	NRG4	0.0114157	0.365533	0.597087	0.133978	0.0773732
Ependymal	AC004949.1	0.011993	0.431078	0.795653	0.0665024	0.0783044
Ependymal	CCDC88C	0.0130596	0.214549	0.363318	0.0657806	0.0783044
Ependymal	CFAP299	0.0130935	0.490929	0.814753	0.167105	0.0783044
Ependymal	FAM19A2	0.0126533	0.191397	0.376426	0.00636739	0.0783044
Ependymal	SUGCT	0.0128043	0.0922725	0.205854	-0.0213092	0.0783044
Ependymal	TTC29	0.0128961	0.341005	0.567316	0.114695	0.0783044
Ependymal	CFAP47	0.0143159	0.341253	0.558225	0.12428	0.0839684
Ependymal	CD109	0.015061	0.128911	0.223346	0.0344765	0.0866719
Ependymal	C8orf37-AS1	0.0154378	0.283091	0.470141	0.0960414	0.087195
Ependymal	AKAP6	0.0215012	0.14127	0.306318	-0.0237788	0.087756
Ependymal	AL357093.2	0.0235164	0.232431	0.503354	-0.0384916	0.087756
Ependymal	AP002075.1	0.0226269	-0.278826	-0.0668047	-0.490847	0.087756
Ependymal	ATP2A2	0.0225254	-0.167752	-0.0568638	-0.278641	0.087756
Ependymal	BBS9	0.0212755	0.154191	0.292483	0.0158997	0.087756
Ependymal	CASC1	0.0232074	0.231341	0.414519	0.0481628	0.087756
Ependymal	CASC2	0.0175902	0.274591	0.50381	0.0453721	0.087756
Ependymal	CCDC13	0.0202132	0.100094	0.227813	-0.0276245	0.087756
Ependymal	CEP85L	0.020026	-0.221794	-0.0534002	-0.390187	0.087756
Ependymal	CFAP52	0.0200316	0.260268	0.484368	0.0361692	0.087756
Ependymal	DAB1	0.0231388	0.0444728	0.137021	-0.0480752	0.087756
Ependymal	DDX5	0.0183176	-0.275232	-0.0486472	-0.501816	0.087756
Ependymal	DGKI	0.0237255	-0.254468	-0.0683079	-0.440628	0.087756
Ependymal	DNAH11	0.0170419	0.337734	0.56144	0.114029	0.087756
Ependymal	DNAH6	0.0239199	0.291949	0.490249	0.0936484	0.087756
Ependymal	DNAH7	0.0187905	0.24316	0.411918	0.0744028	0.087756
Ependymal	EFCAB6	0.0227169	0.272263	0.458708	0.0858178	0.087756
Ependymal	EYA1	0.0204528	0.276437	0.532379	0.020494	0.087756
Ependymal	FBXO16	0.0172891	0.121555	0.202012	0.0410985	0.087756
Ependymal	GINS3	0.0177738	-0.230663	-0.0850247	-0.376302	0.087756
Ependymal	GRIA1	0.0162981	0.25622	0.484029	0.0284121	0.087756
Ependymal	KANSL1	0.0176991	-0.294309	-0.105052	-0.483567	0.087756
Ependymal	LINC00271	0.0225129	0.211918	0.373409	0.0504281	0.087756
Ependymal	LRGUK	0.0214839	0.133277	0.346015	-0.0794606	0.087756
Ependymal	PARD3	0.0223274	0.164693	0.284851	0.044535	0.087756
Ependymal	RPS6KA5	0.0241689	0.218385	0.383208	0.0535618	0.087756
Ependymal	SON	0.0199761	-0.271329	-0.0892743	-0.453383	0.087756
Ependymal	SPAG17	0.0220356	0.262797	0.459987	0.065608	0.087756
Ependymal	SPATA17	0.0219021	0.226534	0.407288	0.0457795	0.087756
Ependymal	TCF4	0.0209857	0.147905	0.320769	-0.0249588	0.087756
Ependymal	CABCOCO1	0.0244569	0.207142	0.348032	0.0662521	0.087757
Ependymal	MAATS1	0.0257685	0.154436	0.279751	0.0291214	0.0903379
Ependymal	WDR78	0.0256972	0.261522	0.442412	0.0806331	0.0903379
Ependymal	CFAP43	0.0261929	0.31128	0.527247	0.0953124	0.090782
Ependymal	CCDC148	0.0268906	0.12763	0.277127	-0.0218677	0.0911294
Ependymal	ENO4	0.0267379	0.106526	0.212126	0.000926104	0.0911294
Ependymal	FBXL13	0.0279669	0.110344	0.243555	-0.0228675	0.0937351
Ependymal	DMD	0.0283704	0.331423	0.594369	0.0684758	0.0940539
Ependymal	ZSWIM6	0.0295295	-0.310562	-0.0938901	-0.527235	0.0968442
Ependymal	LRP2BP	0.0300014	0.16285	0.305668	0.0200327	0.0973449
Ependymal	FARS2	0.0311623	0.119574	0.272609	-0.0334622	0.100047
Ependymal	PCDH9	0.0318018	-0.435908	-0.129548	-0.742267	0.101037
Ependymal	ECT2L	0.0327328	0.19547	0.33558	0.0553596	0.101872
Ependymal	HNRNPA2B1	0.0325248	-0.242916	-0.075194	-0.410637	0.101872
Ependymal	AK7	0.0365097	0.158643	0.301138	0.0161483	0.110543
Ependymal	HIPK3	0.0366059	0.201741	0.381281	0.0222	0.110543
Ependymal	KIAA2012	0.0362595	0.356347	0.622838	0.0898564	0.110543
Ependymal	XPR1	0.0370983	-0.208807	-0.0575451	-0.360069	0.110931
Ependymal	SPATA6L	0.037926	0.240678	0.413898	0.0674569	0.112305
Ependymal	SLC4A4	0.0396387	-0.306455	-0.0760687	-0.536842	0.116248
Ependymal	COL5A1	0.0402439	0.168194	0.319626	0.0167616	0.1166
Ependymal	EYA2	0.0409054	-0.189341	-0.0276591	-0.351023	0.1166
Ependymal	HIVEP2	0.0407242	-0.203627	-0.0398268	-0.367428	0.1166
Ependymal	CCDC173	0.0420927	0.214916	0.400221	0.0296115	0.117717
Ependymal	CCDC30	0.0447712	0.293652	0.517608	0.0696956	0.117717
Ependymal	CRB1	0.0436177	0.2613	0.498749	0.0238514	0.117717
Ependymal	DTHD1	0.0444666	0.389453	0.68857	0.0903354	0.117717
Ependymal	FERMT2	0.0442884	-0.130589	-0.0249289	-0.236249	0.117717
Ependymal	KLHL32	0.0417467	0.232133	0.429847	0.0344183	0.117717
Ependymal	NTRK3	0.0442818	-0.218988	-0.0576298	-0.380346	0.117717
Ependymal	PTPRT	0.0441277	-0.219945	-0.0509473	-0.388942	0.117717
Ependymal	TTC6	0.044194	0.354945	0.628765	0.0811248	0.117717
Ependymal	DCLK1	0.0465999	-0.375091	-0.0901688	-0.660012	0.119215
Ependymal	GABBR1	0.0469043	-0.167406	-0.0182303	-0.316582	0.119215
Ependymal	MFAP3L	0.046451	-0.147586	-0.0323265	-0.262846	0.119215
Ependymal	MIPEP	0.0462467	0.200513	0.34101	0.0600153	0.119215
Ependymal	ANKDD1B	0.0474765	0.149521	0.319208	-0.0201648	0.119672
Ependymal	CFAP58	0.0507762	0.17362	0.314748	0.0324925	0.125489
Ependymal	DLGAP1	0.0510186	-0.27402	-0.0637311	-0.484308	0.125489
Ependymal	HSPA12A	0.0502719	0.161372	0.300362	0.0223824	0.125489
Ependymal	AC063979.2	0.0516171	0.14062	0.255184	0.0260552	0.125946
Ependymal	CFAP221	0.0528498	0.221838	0.395298	0.0483775	0.12793
Ependymal	ROR2	0.053537	0.197273	0.376031	0.0185142	0.128573
Ependymal	VWA3A	0.0547515	0.262546	0.486008	0.0390837	0.130463
Ependymal	AC073050.1	0.0553573	-0.210821	-0.0238342	-0.397807	0.130883
Ependymal	CFAP97D2	0.0577939	0.137742	0.26849	0.00699469	0.134188
Ependymal	DNAH12	0.0577531	0.328542	0.612803	0.0442815	0.134188
Ependymal	GALNT10	0.0585146	-0.146832	-0.0174528	-0.276211	0.134188
Ependymal	LRRC4C	0.0584663	-0.195184	-0.0400334	-0.350334	0.134188
Ependymal	KIF26B	0.0595878	0.109838	0.223662	-0.00398685	0.135629
Ependymal	LINC00886	0.0621104	0.0750125	0.174292	-0.0242666	0.139292
Ependymal	UST	0.0617706	-0.199498	-0.0408726	-0.358124	0.139292
Ependymal	EFCAB2	0.0627228	0.227446	0.411156	0.0437362	0.139638
Ependymal	ARAP2	0.0648143	-0.242182	-0.0401945	-0.444169	0.143249
Ependymal	ARMC3	0.0668767	0.164548	0.29678	0.0323158	0.146744
Ependymal	CAMSAP2	0.070265	-0.127012	0.00520794	-0.259231	0.151347
Ependymal	MEIS1	0.0704632	0.133253	0.248243	0.0182631	0.151347
Ependymal	SYNE1	0.0704013	0.215149	0.43362	-0.00332234	0.151347
Ependymal	APBB2	0.0718234	0.192645	0.357632	0.0276584	0.153002
Ependymal	SH3GL3	0.0722371	0.135172	0.263071	0.00727367	0.153002
Ependymal	FAM155A	0.072964	-0.325627	-0.0547018	-0.596552	0.153476
Ependymal	FGF14	0.0744214	0.251105	0.459201	0.0430088	0.155469
Ependymal	CNTN4	0.0779794	-0.160268	-0.00407795	-0.316458	0.161794
Ependymal	C4orf47	0.0800036	0.165386	0.338644	-0.0078734	0.163252
Ependymal	CSMD3	0.0802877	0.340506	0.633388	0.047625	0.163252
Ependymal	SIK2	0.0795782	-0.192589	-0.0279359	-0.357242	0.163252
Ependymal	CFAP157	0.0838729	0.2964	0.546463	0.0463365	0.168298
Ependymal	VWA3B	0.0836495	0.288596	0.529771	0.0474212	0.168298
Ependymal	CCDC81	0.0844383	0.106605	0.266466	-0.0532562	0.168325
Ependymal	RNF219-AS1	0.0852593	-0.286586	-0.0375403	-0.535631	0.168858
Ependymal	NKAIN2	0.0891223	-0.192102	-0.0141728	-0.37003	0.174245
Ependymal	PPP1R12B	0.0885765	0.212053	0.395335	0.0287713	0.174245
Ependymal	TMEM232	0.0903936	0.234609	0.460161	0.00905656	0.175605
Ependymal	CFAP77	0.0931843	0.183642	0.341145	0.0261393	0.179881
Ependymal	NEAT1	0.0940161	-0.319913	-0.0281264	-0.6117	0.180345
Ependymal	ERICH3	0.0947231	0.160659	0.342263	-0.0209451	0.180566
Ependymal	SLF2	0.0964558	-0.125374	-0.012211	-0.238537	0.182727
Ependymal	AGBL4	0.0990804	0.160153	0.321453	-0.0011479	0.18654
Ependymal	COL4A6	0.102609	0.108933	0.222885	-0.00501842	0.189836
Ependymal	GRID2	0.102698	-0.162631	-0.0138568	-0.311406	0.189836
Ependymal	KCNMA1	0.101535	0.226005	0.425324	0.0266866	0.189836
Ependymal	AC091078.1	0.105744	0.117974	0.273074	-0.0371259	0.190851
Ependymal	AC097515.1	0.104872	0.107977	0.234206	-0.0182516	0.190851
Ependymal	DNAH9	0.105672	0.367198	0.699293	0.0351032	0.190851
Ependymal	GABRG3	0.106376	0.119438	0.33765	-0.0987742	0.190851
Ependymal	TSGA10	0.105882	0.25837	0.50846	0.00828057	0.190851
Ependymal	SLC9A9	0.108673	-0.156366	-0.01108	-0.301651	0.193832
Ependymal	CSGALNACT1	0.112323	0.192707	0.383093	0.00232073	0.199177
Ependymal	CCDC146	0.113916	0.204076	0.38988	0.0182711	0.200834
Ependymal	ALS2CR12	0.117109	0.1368	0.261148	0.0124523	0.204105
Ependymal	CNTN3	0.11652	0.302419	0.653417	-0.0485779	0.204105
Ependymal	CFAP54	0.120373	0.205415	0.394493	0.016338	0.208146
Ependymal	HYDIN	0.120793	0.154839	0.336081	-0.0264038	0.208146
Ependymal	CFAP70	0.122244	0.213443	0.410155	0.0167304	0.209463
Ependymal	AGBL2	0.132862	0.0870854	0.195466	-0.0212956	0.214406
Ependymal	C1orf61	0.128301	-0.197866	-0.0132646	-0.382468	0.214406
Ependymal	CC2D2A	0.129436	0.0904213	0.24264	-0.0617974	0.214406
Ependymal	CFAP61	0.130484	0.140603	0.327483	-0.0462774	0.214406
Ependymal	DAAM2	0.126517	-0.128153	-0.00733794	-0.248968	0.214406
Ependymal	DCDC1	0.131683	0.254648	0.496639	0.0126561	0.214406
Ependymal	DNAH3	0.130849	0.333885	0.644794	0.0229768	0.214406
Ependymal	LINC01876	0.132267	0.141762	0.414331	-0.130808	0.214406
Ependymal	SPARCL1	0.12938	-0.273667	-0.0124328	-0.534902	0.214406
Ependymal	STRBP	0.127973	0.234947	0.465415	0.00447902	0.214406
Ependymal	UNC5C	0.127534	-0.189763	0.0055233	-0.385049	0.214406
Ependymal	LUZP2	0.135974	-0.369491	-0.0228296	-0.716153	0.217488
Ependymal	NEK11	0.13664	0.169798	0.341044	-0.00144802	0.217488
Ependymal	USP2-AS1	0.13691	0.220772	0.432148	0.00939654	0.217488
Ependymal	STXBP5L	0.138497	-0.191363	0.000213517	-0.38294	0.218868
Ependymal	ADGRB3	0.139221	-0.292743	-0.00747478	-0.578012	0.218879
Ependymal	ALK	0.143533	-0.166073	0.00620148	-0.338348	0.223354
Ependymal	LSAMP	0.143211	-0.293776	0.00144172	-0.588994	0.223354
Ependymal	CCDC180	0.14525	0.160179	0.324918	-0.00456029	0.224647
Ependymal	CDHR3	0.145836	0.125032	0.350616	-0.100552	0.224647
Ependymal	CEP126	0.147305	0.14818	0.315239	-0.0188799	0.225769
Ependymal	CTNND2	0.150864	-0.204111	-0.0050084	-0.403213	0.230068
Ependymal	DNAI2	0.154121	0.255032	0.503898	0.00616685	0.232708
Ependymal	SCN1A	0.15355	0.295285	0.608628	-0.0180574	0.232708
Ependymal	ASTN1	0.158622	-0.151723	-0.00211358	-0.301333	0.234829
Ependymal	LEKR1	0.159376	0.0912058	0.194179	-0.0117679	0.234829
Ependymal	NTN1	0.157612	0.125824	0.274031	-0.0223837	0.234829
Ependymal	PLCL1	0.158951	-0.110447	0.0314215	-0.252316	0.234829
Ependymal	ULK4	0.1565	0.158024	0.338341	-0.0222918	0.234829
Ependymal	DNAH10	0.168689	0.265829	0.535097	-0.00343921	0.241551
Ependymal	EFCAB12	0.168183	0.0978091	0.21872	-0.0231019	0.241551
Ependymal	FHAD1	0.166205	0.20469	0.420899	-0.0115195	0.241551
Ependymal	ID4	0.165838	-0.104212	0.0113948	-0.219819	0.241551
Ependymal	KIAA0825	0.166874	0.237083	0.491368	-0.0172018	0.241551
Ependymal	LINGO2	0.167118	0.121734	0.262353	-0.0188855	0.241551
Ependymal	RSPH1	0.175709	0.18903	0.399085	-0.0210249	0.249261
Ependymal	SNTG2	0.175514	0.111023	0.307711	-0.0856659	0.249261
Ependymal	FTL	0.183825	-0.0902133	0.043094	-0.223521	0.259567
Ependymal	DPYSL3	0.186975	-0.195458	0.00638955	-0.397305	0.259984
Ependymal	PDZRN4	0.185731	-0.257324	0.0070522	-0.5217	0.259984
Ependymal	SCN9A	0.186245	0.154794	0.339555	-0.0299674	0.259984
Ependymal	SPON1	0.187529	-0.143261	0.0275764	-0.314099	0.259984
Ependymal	AC025159.1	0.191177	0.0827892	0.185389	-0.0198104	0.263842
Ependymal	TRMT9B	0.201208	0.162808	0.365911	-0.0402952	0.276434
Ependymal	MAPT	0.206321	-0.126057	0.0240654	-0.276179	0.280928
Ependymal	SHANK2	0.206299	0.228246	0.501198	-0.0447053	0.280928
Ependymal	COL21A1	0.212667	0.115666	0.344433	-0.1131	0.288282
Ependymal	SSBP3	0.223197	0.145079	0.351954	-0.0617955	0.301217
Ependymal	LHFPL6	0.2279	-0.226066	0.0125563	-0.464689	0.30621
Ependymal	CLVS1	0.23276	-0.231646	0.0292794	-0.492572	0.311368
Ependymal	NELFA	0.244242	0.114492	0.256744	-0.0277592	0.3253
Ependymal	LINC02055	0.245314	0.317882	0.74778	-0.112016	0.325308
Ependymal	ADAMTSL3	0.252104	-0.155104	0.0241567	-0.334365	0.32826
Ependymal	AL022068.1	0.249924	0.160386	0.345039	-0.0242664	0.32826
Ependymal	EFHC2	0.25154	0.155454	0.330514	-0.0196066	0.32826
Ependymal	NRXN3	0.252921	-0.0942861	0.0425213	-0.231093	0.32826
Ependymal	SCD5	0.251719	-0.158482	0.0215661	-0.338529	0.32826
Ependymal	NEK5	0.258251	0.197279	0.452115	-0.0575572	0.332453
Ependymal	RNF220	0.258332	0.186415	0.423732	-0.0509026	0.332453
Ependymal	GAS7	0.268064	0.153298	0.337126	-0.0305303	0.343528
Ependymal	NCALD	0.272965	0.116756	0.254361	-0.0208495	0.348344
Ependymal	CHST11	0.274514	-0.0944667	0.0592756	-0.248209	0.348862
Ependymal	CMSS1	0.281928	0.176144	0.397873	-0.0455849	0.355322
Ependymal	CPE	0.281248	-0.187586	0.037099	-0.412271	0.355322
Ependymal	AGBL1	0.289015	0.293099	0.854315	-0.268118	0.360264
Ependymal	BACH2	0.289392	-0.120736	0.0626109	-0.304084	0.360264
Ependymal	JUN	0.287292	-0.12989	0.0295302	-0.28931	0.360264
Ependymal	FRMD4A	0.298421	-0.12315	0.0490833	-0.295382	0.368496
Ependymal	ZRANB2	0.298035	-0.145256	0.0763245	-0.366836	0.368496
Ependymal	AC099792.1	0.31105	-0.19231	0.0533982	-0.438018	0.382052
Ependymal	ATP1A2	0.31423	-0.148217	0.047786	-0.344221	0.382052
Ependymal	C8orf34	0.315663	0.254503	0.581277	-0.0722701	0.382052
Ependymal	CCDC60	0.314752	0.0964225	0.262958	-0.0701127	0.382052
Ependymal	EPB41L2	0.315267	-0.0859574	0.0953599	-0.267275	0.382052
Ependymal	MPP6	0.336653	-0.0986965	0.0306162	-0.228009	0.405847
Ependymal	ESR1	0.3429	0.08764	0.205319	-0.0300395	0.410383
Ependymal	GYG2	0.343107	0.195272	0.45297	-0.0624256	0.410383
Ependymal	SIK3	0.344853	-0.130886	0.0506995	-0.312472	0.41086
Ependymal	PDE3A	0.350195	-0.135017	0.0497865	-0.319821	0.415601
Ependymal	MAN2A1	0.370031	-0.138571	0.0499844	-0.327127	0.43744
Ependymal	RAB3GAP2	0.371906	-0.0959783	0.0358163	-0.227773	0.437959
Ependymal	PACRG	0.373943	0.11891	0.282451	-0.0446309	0.438664
Ependymal	CNN3	0.391953	-0.09288	0.093331	-0.279091	0.45803
Ependymal	MAP4K4	0.40239	-0.133785	0.0587571	-0.326327	0.468431
Ependymal	PROS1	0.409444	0.113459	0.309507	-0.082588	0.47483
Ependymal	CLU	0.421947	-0.210069	0.101379	-0.521516	0.487477
Ependymal	MAPK4	0.430514	-0.157107	0.115958	-0.430172	0.495497
Ependymal	PDE7B	0.437111	-0.139498	0.0717384	-0.350735	0.501199
Ependymal	SLC47A2	0.440826	0.195651	0.50724	-0.115937	0.503566
Ependymal	ATP13A4	0.446345	-0.124888	0.0632135	-0.31299	0.507967
Ependymal	NTM	0.459951	-0.213709	0.133115	-0.560533	0.521506
Ependymal	ADGRL2	0.463663	-0.0667239	0.0892989	-0.222747	0.521835
Ependymal	STK39	0.462169	-0.111118	0.059974	-0.28221	0.521835
Ependymal	NRCAM	0.470939	-0.202527	0.116454	-0.521507	0.528075
Ependymal	AP001831.1	0.472935	0.116697	0.301157	-0.0677627	0.528371
Ependymal	NRG1	0.475964	-0.067726	0.0656555	-0.201108	0.529814
Ependymal	LINC00511	0.482115	-0.121404	0.107071	-0.349879	0.53471
Ependymal	MAP2	0.492652	-0.104429	0.0962307	-0.305088	0.544416
Ependymal	ITGA8	0.495168	0.0870215	0.253324	-0.0792812	0.545221
Ependymal	AHCYL2	0.497194	-0.134275	0.124982	-0.393532	0.545482
Ependymal	ARL17B	0.503491	-0.125494	0.0868901	-0.337879	0.550411
Ependymal	CFAP100	0.506565	0.107278	0.315892	-0.101336	0.551794
Ependymal	DNAI1	0.530318	0.119205	0.390236	-0.151826	0.575612
Ependymal	ADCY8	0.536419	-0.174453	0.14174	-0.490646	0.580169
Ependymal	STAT3	0.54193	-0.0703794	0.137636	-0.278395	0.584059
Ependymal	ERBB4	0.572572	-0.148938	0.130332	-0.428208	0.61491
Ependymal	TRDN	0.578948	-0.0970311	0.195739	-0.389801	0.619576
Ependymal	LAMA2	0.601009	-0.113302	0.129256	-0.35586	0.640937
Ependymal	CAMK2D	0.626314	-0.0884458	0.0862888	-0.263181	0.665595
Ependymal	AC092691.1	0.642239	-0.11702	0.151709	-0.385749	0.677796
Ependymal	GJA1	0.640625	-0.106853	0.11916	-0.332867	0.677796
Ependymal	ADGRV1	0.652182	-0.13001	0.173969	-0.433989	0.683676
Ependymal	CD44	0.652294	0.0787165	0.35912	-0.201687	0.683676
Ependymal	ROBO1	0.664722	-0.0965832	0.109682	-0.302848	0.694316
Ependymal	AHCYL1	0.671959	-0.0454166	0.145758	-0.236591	0.69948
Ependymal	DGKG	0.678696	-0.0918364	0.109938	-0.293611	0.704089
Ependymal	GPR158	0.717306	-0.0841801	0.120488	-0.288848	0.741622
Ependymal	CTNNB1	0.773391	0.0460026	0.244675	-0.15267	0.796906
Ependymal	ZBTB16	0.801008	-0.0831269	0.162408	-0.328661	0.822584
Ependymal	ELL2	0.820813	0.0456616	0.242464	-0.151141	0.83772
Ependymal	FKBP5	0.823986	-0.0337258	0.216908	-0.284359	0.83772
Ependymal	MTRNR2L12	0.822543	-0.0339203	0.239941	-0.307781	0.83772
Ependymal	EFNA5	0.882373	0.0601812	0.339918	-0.219556	0.893718
Ependymal	MAP3K5	0.884927	-0.0549491	0.173664	-0.283562	0.893718
Ependymal	GFAP	0.894606	-0.0772441	0.251082	-0.40557	0.900511
Ependymal	SAMD4A	0.926754	-0.0757634	0.30596	-0.457487	0.929803
Ependymal	ARHGEF3	0.983832	0.00679082	0.217323	-0.203742	0.983832

## Sheet: Fibroblasts
cluster	primerid	Pr..Chisq.	coef	ci.hi	ci.lo	fdr
Fibroblasts	CELF2	0.000505822	0.135703	0.26599	0.00541672	0.033514
Fibroblasts	XPO1	0.000644501	0.0593983	0.182203	-0.0634063	0.033514
Fibroblasts	DMD	0.0017208	0.208781	0.385887	0.0316755	0.0596543
Fibroblasts	THSD4	0.00239733	-0.0242924	0.199559	-0.248144	0.0623306
Fibroblasts	ADCY5	0.0105288	0.0622125	0.187812	-0.063387	0.0694588
Fibroblasts	ARHGAP26	0.00592907	0.126773	0.295076	-0.0415306	0.0694588
Fibroblasts	HDAC8	0.010686	0.0709055	0.148423	-0.00661239	0.0694588
Fibroblasts	HLF	0.00808364	0.102904	0.205607	0.000200153	0.0694588
Fibroblasts	HP1BP3	0.0104464	-0.199983	-0.0836654	-0.316301	0.0694588
Fibroblasts	JAM3	0.00418182	0.195912	0.316273	0.0755506	0.0694588
Fibroblasts	KALRN	0.00883675	0.133192	0.223623	0.0427617	0.0694588
Fibroblasts	LHFPL2	0.00614498	0.160993	0.316561	0.00542511	0.0694588
Fibroblasts	MAML3	0.00910914	0.122451	0.232859	0.0120439	0.0694588
Fibroblasts	NCOA1	0.00847234	0.121676	0.266719	-0.0233675	0.0694588
Fibroblasts	SNED1	0.00365123	0.327483	0.57741	0.077555	0.0694588
Fibroblasts	SON	0.0105202	-0.310967	-0.124312	-0.497621	0.0694588
Fibroblasts	FAM85B	0.0118577	0.230842	0.387337	0.0743463	0.0725409
Fibroblasts	EBF1	0.0169915	0.184898	0.3991	-0.0293049	0.0813783
Fibroblasts	FLG-AS1	0.0172146	0.125184	0.244321	0.00604684	0.0813783
Fibroblasts	GRK5	0.0152603	0.124936	0.358568	-0.108696	0.0813783
Fibroblasts	PBX1	0.0165443	0.0850133	0.260333	-0.090306	0.0813783
Fibroblasts	RIN2	0.0171478	0.052983	0.14857	-0.0426038	0.0813783
Fibroblasts	CHST15	0.0231728	0.111139	0.296306	-0.0740275	0.0836008
Fibroblasts	EYA2	0.0228699	0.123654	0.222913	0.0243957	0.0836008
Fibroblasts	KIAA1217	0.0207797	0.0987244	0.239987	-0.0425385	0.0836008
Fibroblasts	PDE7A	0.0233118	0.167823	0.38152	-0.0458744	0.0836008
Fibroblasts	RANBP3L	0.0221044	-0.0165094	0.208298	-0.241317	0.0836008
Fibroblasts	SLC39A11	0.0230231	0.101174	0.180969	0.0213785	0.0836008
Fibroblasts	TTTY14	0.0219917	0.34428	0.873668	-0.185109	0.0836008
Fibroblasts	RBM25	0.0250631	-0.155833	-0.0152443	-0.296421	0.0868854
Fibroblasts	IMMP2L	0.0282635	0.185731	0.339572	0.0318891	0.0923439
Fibroblasts	PRKD1	0.0290783	0.126964	0.305626	-0.0516974	0.0923439
Fibroblasts	RBMS3	0.0293014	0.0334864	0.205358	-0.138385	0.0923439
Fibroblasts	C1RL	0.0355221	0.100608	0.214123	-0.0129075	0.0998458
Fibroblasts	C7	0.0328002	0.0892177	0.206546	-0.0281103	0.0998458
Fibroblasts	HNRNPC	0.0350296	-0.242146	-0.0686728	-0.415619	0.0998458
Fibroblasts	TMTC1	0.0342827	0.117638	0.23872	-0.00344417	0.0998458
Fibroblasts	BNC2	0.0380308	0.193927	0.39118	-0.00332686	0.101773
Fibroblasts	SLC6A20	0.038165	0.115089	0.2776	-0.0474226	0.101773
Fibroblasts	EYA1	0.042408	0.0907411	0.331187	-0.149705	0.110261
Fibroblasts	ITM2B	0.0463099	-0.182425	-0.0359431	-0.328907	0.117469
Fibroblasts	DDX5	0.0516729	-0.187536	-0.0446284	-0.330444	0.124976
Fibroblasts	MAGI1	0.0508889	0.120089	0.232777	0.00740075	0.124976
Fibroblasts	NHSL2	0.0566053	0.108995	0.256722	-0.0387329	0.133794
Fibroblasts	SH3D19	0.059373	0.146027	0.418558	-0.126504	0.137218
Fibroblasts	NEBL	0.0660482	0.224848	0.460235	-0.0105394	0.149326
Fibroblasts	PLEKHA2	0.0732698	0.0422799	0.17168	-0.0871201	0.162129
Fibroblasts	ACADL	0.0794753	0.0554793	0.204266	-0.0933074	0.172196
Fibroblasts	MAML2	0.0819162	0.224468	0.523331	-0.074394	0.173863
Fibroblasts	LTBP1	0.0852428	0.130561	0.287681	-0.0265589	0.177305
Fibroblasts	AC008014.1	0.101879	0.11529	0.241875	-0.0112941	0.185884
Fibroblasts	FLVCR2	0.0924559	0.135939	0.325071	-0.0531923	0.185884
Fibroblasts	IGF1R	0.0949552	0.105375	0.257345	-0.0465945	0.185884
Fibroblasts	LINC00486	0.103666	-0.166269	-0.0118332	-0.320706	0.185884
Fibroblasts	MIR4435-2HG	0.0990713	0.105749	0.312899	-0.101401	0.185884
Fibroblasts	SAT1	0.102809	-0.33165	-0.0318307	-0.63147	0.185884
Fibroblasts	SRRM2	0.101488	-0.221802	-0.0251354	-0.418469	0.185884
Fibroblasts	TCF7L1	0.0987498	0.100509	0.225102	-0.0240845	0.185884
Fibroblasts	KCNT2	0.110485	0.194644	0.404338	-0.0150498	0.194754
Fibroblasts	PKP2	0.121791	0.121137	0.242673	-0.000399146	0.211104
Fibroblasts	ECE1	0.130865	0.11363	0.260982	-0.0337232	0.223115
Fibroblasts	AL445250.1	0.145343	0.102258	0.494867	-0.290352	0.239931
Fibroblasts	GNAS	0.14406	-0.119342	0.0366476	-0.275332	0.239931
Fibroblasts	CACNB2	0.153189	0.162763	0.354758	-0.0292316	0.241412
Fibroblasts	FGF13	0.14861	0.110253	0.296546	-0.0760404	0.241412
Fibroblasts	RASAL2	0.153204	0.26039	0.579081	-0.0583003	0.241412
Fibroblasts	COL6A3	0.155629	0.0965186	0.312963	-0.119925	0.241573
Fibroblasts	SCMH1	0.158806	0.103194	0.257756	-0.0513674	0.24288
Fibroblasts	HIF3A	0.180802	0.138225	0.357731	-0.0812806	0.272512
Fibroblasts	RBMS3-AS3	0.184057	-0.186631	0.0680854	-0.441348	0.273456
Fibroblasts	TIMP3	0.187935	0.0235776	0.233151	-0.185995	0.275285
Fibroblasts	ADAMTS9-AS2	0.193699	0.151711	0.323847	-0.0204261	0.27784
Fibroblasts	KLHL29	0.195022	0.107409	0.239823	-0.0250052	0.27784
Fibroblasts	MT-CO1	0.210538	-0.117805	0.0343288	-0.26994	0.295891
Fibroblasts	LINC01088	0.235773	0.0121882	0.374878	-0.350502	0.325518
Fibroblasts	SSBP3	0.237879	0.126965	0.317807	-0.0638762	0.325518
Fibroblasts	MTRNR2L12	0.241242	-0.17938	0.0297026	-0.388462	0.325834
Fibroblasts	NAV2	0.253764	-0.0317401	0.385744	-0.449224	0.338352
Fibroblasts	KAZN	0.258633	0.111704	0.308209	-0.0848012	0.340479
Fibroblasts	NRXN1	0.276037	-0.143723	0.0312117	-0.318658	0.358848
Fibroblasts	SFMBT2	0.283951	-0.135665	0.0363798	-0.307709	0.364579
Fibroblasts	BACH2	0.2878	-0.170654	0.0506205	-0.391928	0.365014
Fibroblasts	USP53	0.308741	0.127	0.477602	-0.223603	0.386857
Fibroblasts	NTRK3	0.341049	-0.0220614	0.270369	-0.314492	0.417284
Fibroblasts	TRIO	0.338117	0.157352	0.409318	-0.0946151	0.417284
Fibroblasts	SYT1	0.366586	-0.137781	0.0775414	-0.353103	0.438218
Fibroblasts	TACC1	0.365	0.148759	0.412418	-0.1149	0.438218
Fibroblasts	FP671120.1	0.371247	-0.163538	0.0632254	-0.390301	0.438747
Fibroblasts	ODF2L	0.384843	-0.134682	0.0569952	-0.326359	0.449704
Fibroblasts	KCNIP4	0.409805	-0.118464	0.0765097	-0.313439	0.473552
Fibroblasts	ADAMTSL3	0.428725	0.0983147	0.275598	-0.0789691	0.489971
Fibroblasts	ROBO2	0.449342	-0.00066837	0.192882	-0.194218	0.507952
Fibroblasts	LAMA2	0.45488	0.146706	0.389882	-0.0964699	0.508683
Fibroblasts	NID1	0.48328	0.0980258	0.302739	-0.106687	0.534693
Fibroblasts	PIAS1	0.494107	0.0936057	0.360096	-0.172885	0.540917
Fibroblasts	TRPM3	0.512629	0.104088	0.301768	-0.0935923	0.555348
Fibroblasts	CADM2	0.528103	-0.116041	0.111204	-0.343286	0.566214
Fibroblasts	MAMDC2	0.539305	0.0573342	0.312789	-0.198121	0.572323
Fibroblasts	CEMIP	0.602615	0.169488	0.523638	-0.184661	0.63305
Fibroblasts	XIST	0.616853	-0.000242438	0.000966209	-0.00145108	0.641527
Fibroblasts	ZBTB16	0.697723	0.0870824	0.554405	-0.38024	0.718448
Fibroblasts	HSP90AA1	0.727179	-0.098124	0.172166	-0.368413	0.738111
Fibroblasts	NRG3	0.731014	-0.0989906	0.145994	-0.343976	0.738111
Fibroblasts	AC026316.5	0.809927	0.0408617	0.468081	-0.386358	0.809927

## Sheet: MSCs
cluster	primerid	Pr..Chisq.	coef	ci.hi	ci.lo	fdr
MSCs	KCND2	3.88649e-05	-0.662036	-0.341598	-0.982475	0.0136457
MSCs	NRXN1	4.83035e-05	-0.691498	-0.255101	-1.1279	0.0136457
MSCs	CTNNA2	0.000558679	-0.675246	-0.101581	-1.24891	0.0789133
MSCs	MN1	0.00045012	0.570359	0.742424	0.398294	0.0789133
MSCs	PRDM6	0.000879441	0.843021	1.15341	0.532636	0.0846991
MSCs	SLC4A4	0.000899459	0.687555	1.03748	0.337633	0.0846991
MSCs	LINC01184	0.00117003	0.399548	0.583836	0.21526	0.0944378
MSCs	DDR2	0.00259714	0.51316	0.711349	0.31497	0.0980787
MSCs	EYA1	0.00251123	0.792423	1.38798	0.196864	0.0980787
MSCs	GATAD2B	0.00277745	0.362386	0.511892	0.212879	0.0980787
MSCs	HIPK2	0.00177304	-0.470415	-0.102265	-0.838565	0.0980787
MSCs	KIAA1328	0.00185817	-0.351821	-0.0525667	-0.651076	0.0980787
MSCs	ROBO2	0.00232799	-0.309081	0.00747372	-0.625636	0.0980787
MSCs	SOX5	0.00236726	-0.561252	-0.184744	-0.937759	0.0980787
MSCs	SPTLC3	0.00161373	0.669728	1.03232	0.307138	0.0980787
MSCs	TAF15	0.00275415	0.133376	0.402883	-0.136132	0.0980787
MSCs	CNTN1	0.00321484	-0.516283	-0.220405	-0.81216	0.106846
MSCs	CACNB2	0.00435744	0.460994	0.76478	0.157207	0.110351
MSCs	CFLAR	0.00449216	-0.401561	-0.0881505	-0.714972	0.110351
MSCs	FAM91A1	0.00431582	0.576386	1.16496	-0.0121877	0.110351
MSCs	HECTD4	0.00422853	0.391589	0.691711	0.0914668	0.110351
MSCs	PDZRN3	0.00445802	0.69693	1.07425	0.31961	0.110351
MSCs	PTGDR	0.00447917	0.563923	0.89857	0.229277	0.110351
MSCs	FP671120.1	0.00524853	-0.684739	-0.286093	-1.08338	0.118617
MSCs	NAV3	0.00505753	-0.546551	-0.233675	-0.859428	0.118617
MSCs	KDM6A	0.00622235	-0.491746	-0.157638	-0.825854	0.135217
MSCs	LMO4	0.00683454	0.61104	0.889965	0.332115	0.143019
MSCs	APCDD1	0.00793878	0.806568	1.2127	0.400434	0.144691
MSCs	DPP6	0.00721624	-0.442851	-0.0155577	-0.870145	0.144691
MSCs	IQCA1	0.00769496	-0.482144	-0.125595	-0.838694	0.144691
MSCs	SYNE1	0.00761969	-0.491358	-0.173863	-0.808854	0.144691
MSCs	DOCK1	0.0102126	-0.488164	-0.163381	-0.812947	0.178917
MSCs	ELF2	0.0114	-0.0138351	0.364849	-0.392519	0.178917
MSCs	FAM168A	0.0108336	-0.310324	0.021113	-0.64176	0.178917
MSCs	FOXO1	0.0107193	0.64536	1.10228	0.188436	0.178917
MSCs	SNED1	0.0113025	0.712951	1.20115	0.224752	0.178917
MSCs	MAGI1	0.0125548	0.532381	0.927109	0.137652	0.191715
MSCs	QKI	0.0134241	-0.602034	-0.250398	-0.953669	0.199596
MSCs	ACYP2	0.0207611	-0.488676	-0.142287	-0.835065	0.202671
MSCs	ADGRB3	0.0170038	-0.534689	-0.118794	-0.950583	0.202671
MSCs	AKAP13	0.0215563	0.441648	0.758456	0.124841	0.202671
MSCs	ARFGEF1	0.0219964	0.131539	0.389974	-0.126896	0.202671
MSCs	C11orf49	0.0295079	-0.0822368	0.256397	-0.420871	0.202671
MSCs	CADM1	0.0180697	-0.478569	-0.098118	-0.85902	0.202671
MSCs	CADM2	0.0142685	-0.604952	-0.170272	-1.03963	0.202671
MSCs	CBR4	0.0205477	0.259845	0.445483	0.0742077	0.202671
MSCs	CELF1	0.0215676	-0.449777	-0.131628	-0.767927	0.202671
MSCs	CLTCL1	0.0196456	-0.229221	0.0286275	-0.48707	0.202671
MSCs	CUX1	0.0247264	0.342918	0.670807	0.0150291	0.202671
MSCs	CWF19L2	0.0218217	-0.295092	-0.0408956	-0.549288	0.202671
MSCs	ERICH1	0.0159334	0.259805	0.446821	0.0727894	0.202671
MSCs	FCHSD2	0.0231865	0.471959	0.826063	0.117856	0.202671
MSCs	FGGY	0.0293785	0.187311	0.455041	-0.0804198	0.202671
MSCs	FOXP2	0.0205511	0.271166	0.762398	-0.220066	0.202671
MSCs	GHR	0.014761	0.298823	0.499927	0.0977188	0.202671
MSCs	GNAL	0.0236243	0.406507	0.959839	-0.146826	0.202671
MSCs	GPM6A	0.0148091	-0.455828	-0.0413517	-0.870304	0.202671
MSCs	HMGCLL1	0.0283016	0.383346	0.619209	0.147484	0.202671
MSCs	ITCH	0.0268945	0.179359	0.431222	-0.0725052	0.202671
MSCs	JAK2	0.0207133	-0.401009	-0.0323386	-0.769679	0.202671
MSCs	KANSL1	0.0267444	-0.530002	-0.200598	-0.859407	0.202671
MSCs	KCNMA1	0.0268443	0.536562	1.00337	0.0697591	0.202671
MSCs	KSR1	0.0242391	0.383194	0.623673	0.142716	0.202671
MSCs	LINGO2	0.029438	0.49937	1.01486	-0.0161241	0.202671
MSCs	MAP2K5	0.0250595	-0.332885	-0.0237146	-0.642056	0.202671
MSCs	MARCH6	0.0222424	0.303332	0.567819	0.0388456	0.202671
MSCs	NPAS3	0.0194334	-0.661597	-0.0904841	-1.23271	0.202671
MSCs	NUMA1	0.0230807	0.290277	0.503526	0.077028	0.202671
MSCs	OXSR1	0.0245161	-0.45287	-0.140381	-0.765358	0.202671
MSCs	PAQR5	0.0153039	0.384635	0.601314	0.167956	0.202671
MSCs	PCDH9	0.0297487	-0.419297	0.130097	-0.968692	0.202671
MSCs	PDS5A	0.0190535	-0.426453	-0.108817	-0.744088	0.202671
MSCs	PLA2R1	0.017248	0.50387	0.838221	0.169519	0.202671
MSCs	POU6F2	0.0297729	0.108963	0.417321	-0.199395	0.202671
MSCs	PPP1R12B	0.0156447	-0.338065	-0.0260123	-0.650118	0.202671
MSCs	PRKAG2	0.0276401	0.735934	1.20432	0.267553	0.202671
MSCs	SDC2	0.0250591	0.447302	0.732253	0.162351	0.202671
MSCs	SLC38A2	0.016284	0.568782	0.958275	0.17929	0.202671
MSCs	SULF2	0.0269174	0.345372	0.611355	0.0793877	0.202671
MSCs	SYT1	0.0189751	-0.21499	0.13891	-0.568891	0.202671
MSCs	TAX1BP1	0.0289389	0.102825	0.43868	-0.23303	0.202671
MSCs	THSD4	0.0297238	0.529945	0.947512	0.112378	0.202671
MSCs	WDR70	0.0264855	-0.392062	-0.0519655	-0.732158	0.202671
MSCs	C9orf3	0.0311636	0.57117	0.957169	0.185171	0.207097
MSCs	GADL1	0.0309401	0.468409	0.765772	0.171047	0.207097
MSCs	RHOBTB1	0.0315227	0.321663	0.527607	0.115719	0.207097
MSCs	AC018742.1	0.0332862	0.30833	0.591714	0.0249464	0.207361
MSCs	ADAMTS9-AS2	0.0322469	0.298453	0.56369	0.0332161	0.207361
MSCs	ADGRA3	0.033398	-0.372668	-0.0563779	-0.688959	0.207361
MSCs	PIEZO2	0.0323119	0.445686	0.747185	0.144187	0.207361
MSCs	STK3	0.0330321	-0.344056	-0.0210565	-0.667055	0.207361
MSCs	ASAP1	0.0343769	-0.292815	0.119187	-0.704816	0.20771
MSCs	DAAM1	0.0345571	0.215184	0.479734	-0.0493672	0.20771
MSCs	KIAA1671	0.0344996	0.503019	0.957597	0.0484407	0.20771
MSCs	LARGE1	0.0361497	-0.29107	-2.29387e-05	-0.582117	0.214995
MSCs	DAPK1	0.0376894	-0.444026	-0.0845566	-0.803495	0.215096
MSCs	DGKD	0.0372739	0.377731	0.634354	0.121109	0.215096
MSCs	LSAMP	0.0374627	-0.778616	-0.26294	-1.29429	0.215096
MSCs	STX8	0.0374302	0.250006	0.454061	0.0459512	0.215096
MSCs	PLEKHA5	0.0383549	-0.537962	-0.165601	-0.910323	0.216705
MSCs	ZSWIM6	0.0388843	-0.631826	-0.272482	-0.99117	0.217521
MSCs	SRGAP1	0.0408628	-0.404721	-0.102469	-0.706974	0.226348
MSCs	PPM1H	0.0421959	0.264153	0.617585	-0.0892787	0.229237
MSCs	SYNE2	0.0418616	-0.366726	-0.0658252	-0.667627	0.229237
MSCs	COG5	0.0447368	-0.305986	0.00668943	-0.618661	0.236134
MSCs	DOCK5	0.0443786	0.398869	0.70676	0.0909777	0.236134
MSCs	PPP2R2B	0.0454285	-0.629865	-0.142405	-1.11733	0.236134
MSCs	PPP2R5C	0.0455551	0.330564	0.570267	0.090861	0.236134
MSCs	PRDM5	0.0440867	0.0324291	0.300812	-0.235954	0.236134
MSCs	LIFR	0.0462154	-0.088386	0.280039	-0.456812	0.237379
MSCs	DYRK1A	0.0476568	0.0342911	0.348374	-0.279792	0.240412
MSCs	LRCH3	0.0475294	0.0767918	0.313586	-0.160002	0.240412
MSCs	NCOR1	0.0485727	-0.417834	-0.0781456	-0.757522	0.242864
MSCs	AC139887.2	0.0504194	0.187866	0.447236	-0.0715036	0.244043
MSCs	JAM2	0.0505363	0.538511	0.878161	0.198861	0.244043
MSCs	MAPK1	0.0496117	-0.286696	-0.0173292	-0.556062	0.244043
MSCs	RNF213	0.0498243	-0.385971	-0.106543	-0.6654	0.244043
MSCs	ALDH3A2	0.0509762	0.35504	0.646247	0.0638336	0.244081
MSCs	DIRC3	0.0527231	0.40024	0.717775	0.0827063	0.248238
MSCs	DOCK7	0.0526185	-0.297724	0.0305139	-0.625963	0.248238
MSCs	UBE3A	0.0537748	-0.1384	0.162675	-0.439475	0.251097
MSCs	PDE7B	0.0550718	0.547313	0.927858	0.166768	0.251322
MSCs	UBAC2	0.0556023	0.0604725	0.298224	-0.177278	0.251322
MSCs	ZBTB20	0.055375	-0.400324	-0.103825	-0.696822	0.251322
MSCs	ZEB1	0.0550833	-0.416124	-0.0692309	-0.763018	0.251322
MSCs	PSPC1	0.0583506	0.0416637	0.301619	-0.218292	0.261652
MSCs	MAML2	0.0600556	-0.49585	-0.0857593	-0.90594	0.263034
MSCs	PCNX1	0.0597315	-0.327624	0.0106285	-0.665877	0.263034
MSCs	RYR2	0.0600063	-0.370327	0.0856958	-0.82635	0.263034
MSCs	CCDC7	0.0612245	-0.280793	0.00278673	-0.564373	0.263788
MSCs	MAPKAP1	0.0612709	0.207192	0.410856	0.00352842	0.263788
MSCs	MEG3	0.0616283	0.214526	0.427758	0.00129329	0.263788
MSCs	USP15	0.0621446	-0.350434	-0.0411203	-0.659747	0.263998
MSCs	FGFR1	0.063591	0.319644	0.683033	-0.0437449	0.26614
MSCs	SCAF11	0.0631912	-0.244836	0.102336	-0.592008	0.26614
MSCs	KCNQ1OT1	0.0660228	0.092297	0.352608	-0.168014	0.274286
MSCs	KIDINS220	0.0668905	0.251339	0.494972	0.00770583	0.275862
MSCs	FRMD4A	0.0705681	-0.335329	0.0643595	-0.735017	0.28307
MSCs	PHIP	0.0706422	0.342832	0.648644	0.0370209	0.28307
MSCs	PLXNA4	0.069853	0.545588	0.957974	0.133202	0.28307
MSCs	TMOD1	0.0696777	0.743078	1.34406	0.142101	0.28307
MSCs	ILDR2	0.0722801	0.222506	0.490122	-0.0451107	0.285582
MSCs	SFMBT2	0.0718644	-0.415624	-0.108073	-0.723174	0.285582
MSCs	SON	0.0752377	-0.500588	-0.108815	-0.892361	0.295203
MSCs	CHSY3	0.0762368	0.609468	1.24138	-0.0224429	0.297061
MSCs	CHRM3	0.0797226	0.501399	0.943896	0.0589034	0.300857
MSCs	LPAR1	0.0782057	-0.336924	-0.031576	-0.642272	0.300857
MSCs	NPEPPS	0.0799189	0.0376904	0.319299	-0.243919	0.300857
MSCs	PTK2	0.0817227	0.245895	0.709596	-0.217806	0.300857
MSCs	SCARA5	0.0792716	0.411177	0.784604	0.0377491	0.300857
MSCs	SNX9	0.0820034	0.351542	0.636456	0.0666275	0.300857
MSCs	TLK2	0.0812967	0.112656	0.35384	-0.128528	0.300857
MSCs	USP3	0.0786543	0.183002	0.405389	-0.0393843	0.300857
MSCs	ZRANB2	0.081503	-0.396732	-0.0215184	-0.771946	0.300857
MSCs	FBXO32	0.0826756	0.795478	1.43795	0.153002	0.301366
MSCs	HDAC4	0.0840385	0.614202	1.12923	0.0991733	0.30437
MSCs	TMTC1	0.087578	0.340961	0.696795	-0.0148728	0.315169
MSCs	CADPS2	0.0898128	0.392477	0.837303	-0.0523489	0.316325
MSCs	COPA	0.0912585	0.21459	0.420436	0.00874468	0.316325
MSCs	EHMT1	0.0898717	0.059074	0.340153	-0.222005	0.316325
MSCs	FAM85B	0.0891381	0.219034	0.538793	-0.100724	0.316325
MSCs	LINC01482	0.0902786	0.382698	0.708066	0.0573298	0.316325
MSCs	UBE2K	0.0911795	0.28757	0.562249	0.0128915	0.316325
MSCs	USP25	0.0934229	0.370617	0.749839	-0.00860524	0.321853
MSCs	ABLIM1	0.0947408	0.432527	0.822063	0.0429908	0.324415
MSCs	PDE8A	0.0967092	0.390061	0.749713	0.0304093	0.32719
MSCs	WASF2	0.0961895	0.292321	0.529905	0.054737	0.32719
MSCs	GLS	0.0984972	-0.350306	-0.0352196	-0.665393	0.330332
MSCs	ME1	0.0988074	0.0712574	0.333189	-0.190674	0.330332
MSCs	SERINC5	0.0994967	-0.0767567	0.22393	-0.377444	0.33068
MSCs	CEP112	0.101373	0.372495	0.69694	0.0480506	0.332997
MSCs	NAMPT	0.101243	-0.444197	0.322971	-1.21136	0.332997
MSCs	CASK	0.106434	0.0286658	0.301422	-0.24409	0.343608
MSCs	ERBB4	0.107644	-0.396027	-0.0265582	-0.765495	0.343608
MSCs	HELZ	0.105465	0.256295	0.4795	0.0330893	0.343608
MSCs	SLC47A1	0.106499	0.425221	1.17332	-0.322879	0.343608
MSCs	TRIM33	0.10705	0.134703	0.356248	-0.0868419	0.343608
MSCs	ADGRL3	0.109875	0.543262	1.10447	-0.0179419	0.344885
MSCs	BOD1L1	0.109284	-0.192812	0.082244	-0.467867	0.344885
MSCs	MPDZ	0.109286	0.200147	0.449541	-0.0492479	0.344885
MSCs	PHLPP1	0.112717	-0.363486	-0.0279481	-0.699023	0.349124
MSCs	PIAS1	0.112021	0.153976	0.481389	-0.173437	0.349124
MSCs	TSC22D3	0.113079	0.144534	0.500737	-0.211669	0.349124
MSCs	SRSF5	0.117486	0.143	0.420407	-0.134406	0.36076
MSCs	AFAP1	0.121513	0.327689	0.619222	0.0361565	0.365293
MSCs	KDM4C	0.12302	0.311753	0.605976	0.0175289	0.365293
MSCs	MT-CO3	0.122398	-0.223847	0.102742	-0.550435	0.365293
MSCs	NFE2L2	0.122485	0.102529	0.365665	-0.160608	0.365293
MSCs	PACS1	0.122322	0.111762	0.364227	-0.140704	0.365293
MSCs	SMG1	0.123489	-0.353801	0.00238413	-0.709986	0.365293
MSCs	THADA	0.120934	0.237391	0.498994	-0.0242124	0.365293
MSCs	ANXA4	0.127436	0.22928	0.455713	0.00284653	0.367355
MSCs	APLP2	0.126173	0.226458	0.539826	-0.0869093	0.367355
MSCs	ATP1B1	0.126939	0.366409	0.761451	-0.0286327	0.367355
MSCs	DMD	0.126046	0.302589	0.613051	-0.00787291	0.367355
MSCs	SPPL3	0.126816	0.270487	0.508205	0.0327696	0.367355
MSCs	TENT2	0.128264	-0.202389	0.101543	-0.506321	0.367863
MSCs	TAOK1	0.129624	0.116833	0.455867	-0.222202	0.368027
MSCs	ZFYVE9	0.129583	0.0438911	0.288728	-0.200945	0.368027
MSCs	FRYL	0.132132	0.164806	0.410395	-0.0807816	0.368765
MSCs	GPC6	0.130876	0.400224	0.788045	0.012404	0.368765
MSCs	MT-ATP6	0.131374	-0.300638	0.00464423	-0.60592	0.368765
MSCs	WASHC1	0.132494	-0.370474	-0.00917916	-0.731768	0.368765
MSCs	DIP2A	0.134259	0.250649	0.501737	-0.000438987	0.37003
MSCs	GALNT1	0.134012	0.169754	0.420518	-0.0810095	0.37003
MSCs	XPO1	0.134941	0.123508	0.471379	-0.224363	0.370105
MSCs	GRM7	0.138779	#N/A	#N/A	#N/A	0.371177
MSCs	MCU	0.137551	-0.0423781	0.335743	-0.420499	0.371177
MSCs	PAK3	0.137843	0.277072	0.52257	0.0315739	0.371177
MSCs	PRKN	0.137927	0.191989	0.532212	-0.148234	0.371177
MSCs	RAB2A	0.139166	-0.270025	0.0622866	-0.602337	0.371177
MSCs	SLIT2	0.139273	0.477142	0.945531	0.00875245	0.371177
MSCs	CASC4	0.142786	-0.25047	0.0410999	-0.542039	0.377805
MSCs	EXT1	0.143098	0.380493	0.756147	0.00483785	0.377805
MSCs	TTN-AS1	0.144072	0.138944	0.371968	-0.0940792	0.378608
MSCs	ASCC3	0.146139	-0.408397	-0.0318501	-0.784944	0.382262
MSCs	ANK3	0.147244	0.161488	0.469292	-0.146315	0.383378
MSCs	ANKRD11	0.148128	-0.309528	0.155564	-0.774621	0.383909
MSCs	ADAM9	0.159897	0.277778	0.534449	0.0211068	0.391273
MSCs	ARHGEF28	0.156192	0.343497	0.778019	-0.0910255	0.391273
MSCs	BICC1	0.156699	0.0409093	0.455798	-0.373979	0.391273
MSCs	BMPER	0.160484	0.442489	0.832111	0.0528674	0.391273
MSCs	ECPAS	0.163435	-0.284453	0.0329994	-0.601906	0.391273
MSCs	FAT4	0.153084	0.383682	0.754361	0.0130021	0.391273
MSCs	FER	0.163239	0.0201159	0.357697	-0.317465	0.391273
MSCs	FGFR2	0.163236	0.126633	0.377856	-0.12459	0.391273
MSCs	FP236383.1	0.154083	-0.622925	-0.0350317	-1.21082	0.391273
MSCs	GPHN	0.161629	-0.329518	0.0382826	-0.697318	0.391273
MSCs	LDLRAD4	0.159112	0.157351	0.495801	-0.1811	0.391273
MSCs	LIMCH1	0.155836	-0.0324497	0.29451	-0.35941	0.391273
MSCs	MAP1B	0.153923	-0.195656	0.187331	-0.578643	0.391273
MSCs	MT-CYB	0.158816	-0.226797	0.123286	-0.576879	0.391273
MSCs	NMNAT2	0.161134	0.267552	0.667779	-0.132675	0.391273
MSCs	NUCKS1	0.15847	0.198877	0.476006	-0.0782528	0.391273
MSCs	PICALM	0.162174	-0.0351614	0.289134	-0.359456	0.391273
MSCs	THRAP3	0.157255	0.199295	0.439802	-0.0412111	0.391273
MSCs	DOCK4	0.171973	-0.426978	-0.014883	-0.839072	0.39659
MSCs	KAT6A	0.167197	0.22329	0.469587	-0.0230074	0.39659
MSCs	LINC00486	0.171863	-0.441764	0.0189715	-0.902499	0.39659
MSCs	NRG3	0.169361	-0.749021	-0.0124328	-1.48561	0.39659
MSCs	PAM	0.169022	0.413262	0.83694	-0.010417	0.39659
MSCs	PRKCE	0.170801	0.00555603	0.380324	-0.369212	0.39659
MSCs	SLC16A9	0.16753	0.232375	0.454952	0.00979776	0.39659
MSCs	UNC5C	0.170697	0.394296	0.790982	-0.00238955	0.39659
MSCs	WRN	0.168818	0.209639	0.466312	-0.0470336	0.39659
MSCs	BOC	0.175181	0.253926	0.612493	-0.104641	0.402348
MSCs	SETX	0.176031	-0.310889	0.0942506	-0.716028	0.402663
MSCs	RBM25	0.177116	-0.248952	0.0934538	-0.591359	0.403511
MSCs	DENND4A	0.179594	-0.201217	0.220294	-0.622728	0.407513
MSCs	DANT2	0.1806	0.21923	0.588376	-0.149917	0.408157
MSCs	MAGI2	0.181735	-0.337087	0.00996534	-0.684139	0.409084
MSCs	CDC27	0.182463	-0.171462	0.117738	-0.460662	0.409093
MSCs	ADK	0.188828	0.155417	0.594813	-0.28398	0.41289
MSCs	ATL2	0.184976	0.228288	0.453062	0.00351384	0.41289
MSCs	ATP2B4	0.190667	-0.329767	-0.0291604	-0.630374	0.41289
MSCs	CLMP	0.189766	0.263065	0.518287	0.00784311	0.41289
MSCs	CTNNA3	0.190733	-0.217074	0.293182	-0.72733	0.41289
MSCs	PLEKHA6	0.189687	0.238316	0.633896	-0.157264	0.41289
MSCs	RASGRF2	0.187483	0.215908	0.637247	-0.205431	0.41289
MSCs	SLC9B2	0.189215	0.324978	0.667978	-0.0180217	0.41289
MSCs	TRIP12	0.186603	0.250988	0.586564	-0.084588	0.41289
MSCs	PCM1	0.191918	-0.288704	0.0266937	-0.604101	0.413868
MSCs	AFAP1L1	0.198465	0.145406	0.41954	-0.128728	0.414841
MSCs	CAPZB	0.199711	0.270619	0.572546	-0.0313079	0.414841
MSCs	GPATCH8	0.19613	0.206545	0.533601	-0.120511	0.414841
MSCs	NHSL2	0.195387	0.366874	0.841678	-0.107931	0.414841
MSCs	OGA	0.194968	0.298992	0.666073	-0.0680898	0.414841
MSCs	PPP2R2A	0.196743	0.274655	0.558285	-0.00897388	0.414841
MSCs	SETBP1	0.199263	-0.30998	0.0458046	-0.665764	0.414841
MSCs	SMARCA2	0.197601	0.196951	0.437573	-0.0436715	0.414841
MSCs	TCF7L2	0.197597	0.200039	0.528614	-0.128536	0.414841
MSCs	TLK1	0.199678	-0.239037	0.0922896	-0.570364	0.414841
MSCs	KAT2B	0.200944	0.17415	0.467157	-0.118856	0.415874
MSCs	MARK1	0.20284	0.284965	0.585234	-0.0153048	0.418265
MSCs	TMEM131	0.204379	-0.234645	0.0564437	-0.525733	0.419905
MSCs	FOXP1	0.205362	0.449132	1.06326	-0.164998	0.420397
MSCs	CHN1	0.212085	0.272527	0.557411	-0.0123563	0.425647
MSCs	CREB3L2	0.210789	0.218995	0.490357	-0.0523674	0.425647
MSCs	MAP4K5	0.212758	0.0597324	0.320327	-0.200862	0.425647
MSCs	PAN3	0.211681	-0.244413	0.0753916	-0.564217	0.425647
MSCs	PGR	0.210641	0.250757	0.532311	-0.0307965	0.425647
MSCs	PRPF4B	0.209876	-0.246955	0.0457874	-0.539698	0.425647
MSCs	TBC1D8	0.2132	0.48444	1.0334	-0.0645249	0.425647
MSCs	PTBP2	0.218186	-0.299636	0.0612836	-0.660555	0.432544
MSCs	ST6GAL1	0.217984	0.12366	0.428132	-0.180811	0.432544
MSCs	ABL1	0.221615	-0.0989577	0.191356	-0.389271	0.434097
MSCs	AC013394.1	0.221853	-0.382293	0.0796788	-0.844264	0.434097
MSCs	DCAF6	0.222384	-0.0707461	0.252147	-0.393639	0.434097
MSCs	PRKDC	0.221885	0.351035	0.804309	-0.102239	0.434097
MSCs	WWTR1	0.222811	0.315133	0.707878	-0.0776123	0.434097
MSCs	UBE2B	0.224658	0.227703	0.481039	-0.0256322	0.436192
MSCs	NEBL	0.227608	0.298061	0.641562	-0.0454402	0.440406
MSCs	ARID1B	0.231146	0.415734	0.890784	-0.0593166	0.441209
MSCs	KANSL1L	0.230594	0.229492	0.474944	-0.0159594	0.441209
MSCs	NRXN3	0.23109	-0.202305	0.129671	-0.534281	0.441209
MSCs	PPP1CB	0.229143	-0.457019	0.226565	-1.1406	0.441209
MSCs	CCNH	0.232003	0.296617	0.637935	-0.0447006	0.441353
MSCs	PIK3C2A	0.232983	0.351084	0.721826	-0.0196582	0.441729
MSCs	CNTN4	0.234738	0.125159	0.435959	-0.185641	0.44209
MSCs	JARID2	0.234347	-0.47984	0.0689028	-1.02858	0.44209
MSCs	ITPR2	0.23849	-0.361402	-0.0309987	-0.691805	0.444891
MSCs	PLCE1	0.239375	0.370859	0.774631	-0.0329137	0.444891
MSCs	TRPS1	0.23739	-0.332835	0.0351405	-0.70081	0.444891
MSCs	ZNF518A	0.238902	-0.241222	0.0543458	-0.536789	0.444891
MSCs	NRF1	0.242046	0.0831375	0.30933	-0.143055	0.44838
MSCs	PARG	0.242914	0.210486	0.45971	-0.0387385	0.448519
MSCs	CAMKMT	0.243773	0.198142	0.519278	-0.122995	0.448637
MSCs	DOCK9	0.246264	0.210574	0.548539	-0.127391	0.451751
MSCs	SOBP	0.247275	0.138127	0.434308	-0.158055	0.452136
MSCs	AUH	0.249108	-0.180727	0.107223	-0.468676	0.453291
MSCs	MAPK8	0.249511	0.0580238	0.322611	-0.206563	0.453291
MSCs	COA1	0.252637	0.249844	0.535465	-0.0357767	0.455547
MSCs	DICER1	0.252792	-0.212858	0.0711568	-0.496873	0.455547
MSCs	SH3D19	0.253171	0.247992	0.555715	-0.0597305	0.455547
MSCs	EBF1	0.256522	0.25313	0.573655	-0.0673939	0.455771
MSCs	NEK7	0.25587	0.125027	0.351747	-0.101694	0.455771
MSCs	SOS1	0.255142	-0.260642	0.0599383	-0.581222	0.455771
MSCs	USP54	0.255887	0.323068	0.708845	-0.0627096	0.455771
MSCs	TCF4	0.257918	-0.285956	0.0625452	-0.634457	0.456814
MSCs	CCDC14	0.263232	0.209103	0.515478	-0.0972714	0.463519
MSCs	PDS5B	0.264985	-0.135675	0.158455	-0.429805	0.463519
MSCs	PIK3C2B	0.263528	0.235849	0.565822	-0.0941238	0.463519
MSCs	SYNJ2	0.26484	0.167077	0.445252	-0.111097	0.463519
MSCs	NTRK3	0.266607	0.341935	0.767132	-0.0832616	0.464916
MSCs	LYPLAL1	0.26978	-0.248023	0.0705012	-0.566548	0.465797
MSCs	RANBP2	0.270409	-0.275169	0.132342	-0.68268	0.465797
MSCs	RPRD2	0.268434	0.0865276	0.354336	-0.181281	0.465797
MSCs	SRSF11	0.269502	-0.293418	0.0578278	-0.644663	0.465797
MSCs	B4GALT1	0.271291	0.154114	0.600586	-0.292358	0.465894
MSCs	HTT	0.273332	-0.092114	0.254967	-0.439195	0.467978
MSCs	PTPRM	0.275896	0.221067	0.554895	-0.112761	0.47094
MSCs	HGSNAT	0.277788	0.173825	0.402451	-0.054801	0.472244
MSCs	PDE1A	0.278332	0.331548	0.713783	-0.0506865	0.472244
MSCs	CECR2	0.280108	0.167423	0.468129	-0.133283	0.472421
MSCs	RB1	0.279423	-0.227198	0.0820647	-0.53646	0.472421
MSCs	PLD1	0.283474	0.250023	0.546839	-0.0467935	0.474098
MSCs	RFX2	0.282028	0.120599	0.379772	-0.138573	0.474098
MSCs	SPATS2L	0.283619	-0.0756475	0.211496	-0.362791	0.474098
MSCs	DNAJC1	0.285992	-0.287397	0.0148987	-0.589692	0.475252
MSCs	ZFHX3	0.285701	0.323229	0.786765	-0.140306	0.475252
MSCs	LEPR	0.287768	0.401644	0.954201	-0.150914	0.4768
MSCs	R3HDM1	0.289464	-0.279333	0.0771927	-0.635858	0.478208
MSCs	DPP10	0.294153	-0.325459	0.124318	-0.775236	0.483997
MSCs	RABGAP1L	0.294681	0.0816202	0.41927	-0.25603	0.483997
MSCs	DNM3	0.299699	-0.177084	0.168633	-0.5228	0.486619
MSCs	FBXL7	0.298883	0.276964	0.640221	-0.0862936	0.486619
MSCs	HYDIN	0.299723	0.20561	0.469596	-0.0583752	0.486619
MSCs	ZNF207	0.297627	-0.204477	0.0810596	-0.490015	0.486619
MSCs	KCNIP4	0.302145	-0.305147	0.0979831	-0.708278	0.487749
MSCs	STARD9	0.301493	0.255358	0.551462	-0.0407467	0.487749
MSCs	GARNL3	0.304727	0.205149	0.485238	-0.07494	0.489121
MSCs	ZNF148	0.304077	0.218672	0.474487	-0.0371434	0.489121
MSCs	KAZN	0.306396	-0.214724	0.33868	-0.768127	0.48972
MSCs	PBRM1	0.306833	-0.179763	0.104068	-0.463594	0.48972
MSCs	APPBP2	0.308178	0.217692	0.494084	-0.0586998	0.490481
MSCs	MAGI3	0.309928	0.144608	0.464942	-0.175726	0.491881
MSCs	NR3C1	0.311404	-0.225109	0.114777	-0.564995	0.492839
MSCs	MAP3K2	0.312836	0.0829943	0.374865	-0.208876	0.493721
MSCs	ARHGAP21	0.314927	-0.255409	0.106541	-0.61736	0.49426
MSCs	MACF1	0.314604	-0.311107	0.179834	-0.802049	0.49426
MSCs	ZNF292	0.320121	-0.226209	0.0901856	-0.542603	0.501021
MSCs	NR3C2	0.321794	0.289461	0.6396	-0.0606771	0.502248
MSCs	CAST	0.322713	-0.199867	0.123067	-0.522802	0.502294
MSCs	SPIN1	0.324787	0.0785548	0.323875	-0.166765	0.504133
MSCs	LDB2	0.327242	0.291654	0.740317	-0.15701	0.506553
MSCs	CACNA2D3	0.328432	0.311027	0.735841	-0.113787	0.507005
MSCs	TCF7L1	0.330985	0.185808	0.565966	-0.19435	0.509554
MSCs	DPYD	0.332777	-0.337489	0.0869983	-0.761977	0.51013
MSCs	DYNC2H1	0.333164	-0.18495	0.132435	-0.502335	0.51013
MSCs	NTM	0.335426	-0.279515	0.170192	-0.729222	0.512205
MSCs	CSNK1A1	0.342678	0.218216	0.544954	-0.108522	0.514931
MSCs	KMT2C	0.341165	0.0276602	0.366171	-0.31085	0.514931
MSCs	RNF13	0.342378	0.050561	0.328086	-0.226964	0.514931
MSCs	RSF1	0.340939	-0.101251	0.175049	-0.377552	0.514931
MSCs	SIPA1L1	0.34268	0.066765	0.426222	-0.292692	0.514931
MSCs	TGFB2	0.338712	0.278215	0.628519	-0.0720887	0.514931
MSCs	MAP4K4	0.344215	-0.218448	0.19914	-0.636035	0.515866
MSCs	EP300	0.346274	0.204095	0.474623	-0.0664331	0.516213
MSCs	ZFC3H1	0.345951	-0.17565	0.202406	-0.553705	0.516213
MSCs	PDZD2	0.350742	0.0695123	0.455099	-0.316074	0.521498
MSCs	ENPP6	0.351943	0.225957	0.546687	-0.0947731	0.521911
MSCs	CDC42BPB	0.354248	0.21063	0.481673	-0.0604124	0.523111
MSCs	NBEAL1	0.354604	-0.222727	0.193621	-0.639075	0.523111
MSCs	PDGFD	0.355757	0.411186	0.923408	-0.101035	0.523445
MSCs	UACA	0.357383	0.207713	0.67777	-0.262344	0.524471
MSCs	ABCD3	0.358611	0.0358781	0.271863	-0.200106	0.52491
MSCs	USP33	0.364131	0.199841	0.440896	-0.041215	0.531612
MSCs	DNAH14	0.365322	0.245098	0.572464	-0.0822677	0.531977
MSCs	CDC14A	0.368311	0.277856	0.65206	-0.0963485	0.53212
MSCs	FNDC3B	0.367969	-0.282033	0.151591	-0.715658	0.53212
MSCs	SH3BP5	0.369188	0.247016	0.575051	-0.0810183	0.53212
MSCs	TRPC4AP	0.367374	-0.0368957	0.285776	-0.359568	0.53212
MSCs	ARGLU1	0.373924	-0.307038	0.100307	-0.714383	0.532509
MSCs	CUL3	0.373475	0.0444089	0.289585	-0.200768	0.532509
MSCs	IL1RAPL1	0.373777	-0.255598	0.110059	-0.621255	0.532509
MSCs	RBBP7	0.372323	0.134393	0.44867	-0.179884	0.532509
MSCs	RREB1	0.37417	0.199921	0.456851	-0.0570083	0.532509
MSCs	CLK1	0.377865	0.00599265	0.26124	-0.249255	0.536416
MSCs	BBS9	0.379387	0.232289	0.560637	-0.0960592	0.537227
MSCs	USP47	0.383097	-0.211262	0.207381	-0.629905	0.541124
MSCs	MAP4	0.386432	0.139892	0.413562	-0.133778	0.54312
MSCs	TRPC1	0.386234	0.168177	0.41346	-0.0771071	0.54312
MSCs	BMP5	0.392449	0.307257	0.721866	-0.107353	0.544996
MSCs	FNDC3A	0.39133	0.141684	0.451664	-0.168295	0.544996
MSCs	INVS	0.39259	0.0115487	0.309702	-0.286604	0.544996
MSCs	LCOR	0.389707	-0.181156	0.141207	-0.503519	0.544996
MSCs	SH3BGRL	0.389343	0.156738	0.392315	-0.0788379	0.544996
MSCs	PDSS2	0.394521	0.162212	0.390935	-0.06651	0.546335
MSCs	ADAMTSL3	0.400482	0.334122	0.78837	-0.120126	0.550178
MSCs	HECTD1	0.401191	-0.117593	0.160202	-0.395388	0.550178
MSCs	RAPGEF2	0.399109	-0.158605	0.324998	-0.642207	0.550178
MSCs	TCF25	0.400532	-0.180279	0.28924	-0.649798	0.550178
MSCs	CAMSAP2	0.403659	-0.184478	0.0985117	-0.467467	0.552221
MSCs	PTPRE	0.404815	0.227944	0.645805	-0.189917	0.552465
MSCs	C20orf194	0.407554	-0.139185	0.139271	-0.41764	0.554863
MSCs	ZNF721	0.409405	-0.191329	0.123143	-0.505801	0.556043
MSCs	TRPM3	0.410524	-0.387749	0.198977	-0.974475	0.556225
MSCs	GRK5	0.422297	0.0734114	0.394049	-0.247226	0.56809
MSCs	RBM39	0.421912	0.0720373	0.380144	-0.23607	0.56809
MSCs	SDCCAG8	0.421347	0.122751	0.401479	-0.155978	0.56809
MSCs	DPH6	0.424232	-0.23472	0.133192	-0.602632	0.569338
MSCs	SGCD	0.425734	0.179905	0.507075	-0.147265	0.57
MSCs	CDH11	0.429511	0.25267	0.744042	-0.238702	0.572344
MSCs	PRKG1	0.42871	-0.292027	0.164353	-0.748407	0.572344
MSCs	ATP1B3	0.435943	-0.0981711	0.272147	-0.468489	0.575485
MSCs	NAV2	0.433528	-0.370801	0.225492	-0.967094	0.575485
MSCs	NEO1	0.43451	0.151043	0.439899	-0.137813	0.575485
MSCs	SMCHD1	0.435039	-0.242308	0.143523	-0.628138	0.575485
MSCs	CDC14B	0.440475	0.140531	0.384294	-0.103233	0.580112
MSCs	PHACTR2	0.444883	0.202711	0.497679	-0.0922561	0.583199
MSCs	STIM2	0.444039	0.147396	0.465115	-0.170322	0.583199
MSCs	ACADL	0.448083	0.171746	0.41265	-0.0691587	0.583418
MSCs	CPLANE1	0.448147	0.161763	0.509172	-0.185647	0.583418
MSCs	SLC38A1	0.447531	0.210172	0.562816	-0.142473	0.583418
MSCs	MT-CO1	0.453336	-0.310771	0.199121	-0.820663	0.587466
MSCs	PARD3B	0.453206	0.125172	0.38569	-0.135347	0.587466
MSCs	ABI3BP	0.455284	0.0783757	0.415582	-0.258831	0.588639
MSCs	NECAB1	0.456748	0.164628	0.469002	-0.139746	0.589184
MSCs	NKTR	0.463484	-0.181936	0.14223	-0.506102	0.591514
MSCs	PHLDB2	0.462419	0.298631	0.808935	-0.211673	0.591514
MSCs	PIP5K1C	0.463788	0.150911	0.550049	-0.248228	0.591514
MSCs	REV3L	0.461414	0.106748	0.411164	-0.197668	0.591514
MSCs	TIMP2	0.459787	-0.174595	0.119352	-0.468543	0.591514
MSCs	EVA1C	0.468808	0.231693	0.585564	-0.122179	0.596569
MSCs	NALCN	0.4748	0.0570181	0.417111	-0.303074	0.602836
MSCs	TNRC6C	0.477843	0.181005	0.460179	-0.0981687	0.603986
MSCs	TTBK2	0.477715	-0.113717	0.175313	-0.402747	0.603986
MSCs	SPTBN1	0.479693	0.181623	0.532294	-0.169048	0.604969
MSCs	SLC7A2	0.483291	-0.109285	0.400743	-0.619312	0.60815
MSCs	SEPT2	0.484789	0.166412	0.429301	-0.096477	0.60868
MSCs	MAP3K5	0.486958	-0.237942	0.139995	-0.615878	0.610047
MSCs	PPP1R9A	0.488952	0.144007	0.410844	-0.122831	0.611189
MSCs	ADAM12	0.490297	0.259455	0.672326	-0.153416	0.611519
MSCs	FAT3	0.497848	0.216505	0.574469	-0.14146	0.619568
MSCs	AKAP9	0.501341	-0.253794	0.159612	-0.6672	0.619819
MSCs	PITPNA	0.500533	0.00443827	0.25647	-0.247593	0.619819
MSCs	TTTY14	0.501316	0.0858133	0.740207	-0.56858	0.619819
MSCs	ERGIC1	0.503147	0.113179	0.347964	-0.121607	0.620694
MSCs	SNTG2	0.505379	0.245833	0.790145	-0.298479	0.620807
MSCs	SSH2	0.505436	0.208209	0.545281	-0.128863	0.620807
MSCs	IGF2R	0.50965	0.245353	0.638645	-0.147939	0.624626
MSCs	AFF1	0.514503	0.136152	0.482592	-0.210289	0.626175
MSCs	BABAM2	0.515347	0.0452969	0.362123	-0.27153	0.626175
MSCs	FLG-AS1	0.514414	0.152155	0.458828	-0.154518	0.626175
MSCs	ZNF91	0.514398	0.107885	0.343394	-0.127623	0.626175
MSCs	CDON	0.517957	0.34551	0.883092	-0.192072	0.627892
MSCs	FUT8	0.518984	0.149445	0.405816	-0.106926	0.627892
MSCs	FOXO3	0.521331	-0.220021	0.148618	-0.58866	0.628043
MSCs	LRMDA	0.520669	0.16674	0.658628	-0.325148	0.628043
MSCs	TIMM23B	0.523734	0.0192744	0.284927	-0.246378	0.629595
MSCs	EYA2	0.525641	0.273905	0.749451	-0.20164	0.630546
MSCs	GMDS-DT	0.536405	0.134751	0.466346	-0.196843	0.63804
MSCs	GTF2IRD1	0.536269	-0.0747563	0.270156	-0.419668	0.63804
MSCs	SMURF1	0.535447	0.134722	0.371107	-0.101664	0.63804
MSCs	ZNF407	0.534378	-0.170867	0.141723	-0.483457	0.63804
MSCs	MED13	0.539805	0.205909	0.566253	-0.154434	0.640736
MSCs	CHD9	0.541839	-0.221831	0.226505	-0.670167	0.641801
MSCs	ROBO1	0.547359	0.144747	0.532469	-0.242975	0.646252
MSCs	VCAN	0.547885	-0.238473	0.26432	-0.741265	0.646252
MSCs	FHIT	0.550432	0.0637647	0.426854	-0.299325	0.647885
MSCs	RIC1	0.551562	0.0879237	0.33908	-0.163232	0.647885
MSCs	GIGYF2	0.5539	0.15275	0.431133	-0.125634	0.649281
MSCs	PRRC2C	0.556488	-0.200102	0.229404	-0.629608	0.650302
MSCs	SRRM2	0.557073	-0.223808	0.177158	-0.624774	0.650302
MSCs	EGFR	0.564864	0.191148	0.563769	-0.181473	0.658037
MSCs	AGBL4	0.566267	-0.124035	0.234187	-0.482257	0.658287
MSCs	MT-CO2	0.567408	-0.12047	0.258143	-0.499083	0.658287
MSCs	MT-ND4	0.572469	-0.158176	0.226869	-0.543221	0.661442
MSCs	RBFOX1	0.571373	-0.232466	0.247051	-0.711983	0.661442
MSCs	FAM155A	0.575235	-0.0715556	0.271557	-0.414668	0.663169
MSCs	NTN1	0.576311	0.0578395	0.387722	-0.272043	0.663169
MSCs	AFF2	0.579201	#N/A	#N/A	#N/A	0.66514
MSCs	FOXN3	0.583991	0.19412	0.630206	-0.241966	0.666575
MSCs	HSP90AA1	0.582857	0.0344363	0.548365	-0.479493	0.666575
MSCs	UBE4B	0.581745	0.0399155	0.291927	-0.212096	0.666575
MSCs	JAM3	0.587046	0.326291	0.941237	-0.288654	0.668712
MSCs	TPM4	0.588524	0.16559	0.545169	-0.213989	0.669047
MSCs	SLC26A7	0.590536	0.260564	0.729215	-0.208087	0.669985
MSCs	GRIK2	0.593753	-0.181006	0.199642	-0.561655	0.672192
MSCs	PACSIN2	0.59486	0.146298	0.426394	-0.133799	0.672192
MSCs	EPB41L2	0.600378	0.0553689	0.608316	-0.497578	0.677073
MSCs	CBFA2T2	0.604188	0.0308256	0.331158	-0.269507	0.677314
MSCs	SEPT7	0.603241	-0.182662	0.166641	-0.531965	0.677314
MSCs	UAP1	0.601967	0.00389809	0.367038	-0.359242	0.677314
MSCs	TULP4	0.612913	-0.101292	0.16805	-0.370635	0.685734
MSCs	MEF2A	0.614221	0.223513	0.681405	-0.23438	0.68584
MSCs	CACNA1C	0.616646	-0.176637	0.212539	-0.565813	0.687189
MSCs	LRBA	0.627733	0.105308	0.426126	-0.21551	0.698168
MSCs	LTBP1	0.632298	0.101346	0.352537	-0.149846	0.701863
MSCs	SPEN	0.635867	-0.129007	0.156671	-0.414685	0.704441
MSCs	CPQ	0.642862	0.115031	0.46877	-0.238707	0.706743
MSCs	SLC41A2	0.642949	0.120604	0.403863	-0.162655	0.706743
MSCs	TNIK	0.640396	-0.627462	-0.177302	-1.07762	0.706743
MSCs	WDFY2	0.64059	0.0374427	0.323399	-0.248513	0.706743
MSCs	TBX15	0.650493	-0.0177996	0.511831	-0.54743	0.713648
MSCs	MTRNR2L12	0.657784	-0.242739	0.28986	-0.775338	0.720248
MSCs	CEMIP	0.662152	-0.396385	0.46825	-1.26102	0.723628
MSCs	ANKRD17	0.667168	0.156468	0.492573	-0.179638	0.727385
MSCs	P4HA1	0.668165	-0.0283545	0.288353	-0.345062	0.727385
MSCs	CNTNAP2	0.676708	-0.139777	0.277956	-0.557511	0.735018
MSCs	NFIC	0.677778	-0.125912	0.169541	-0.421365	0.735018
MSCs	EYS	0.688383	0.371287	1.21618	-0.473607	0.745088
MSCs	HOOK3	0.692175	-0.125459	0.18747	-0.438388	0.747761
MSCs	NEAT1	0.694013	0.166762	0.583959	-0.250434	0.748316
MSCs	TRABD2B	0.703166	0.128857	0.453081	-0.195367	0.756136
MSCs	TXNIP	0.703942	0.218225	0.7159	-0.27945	0.756136
MSCs	ERBIN	0.706029	0.0946279	0.431596	-0.242341	0.756938
MSCs	TJP1	0.707535	-0.109589	0.28812	-0.507298	0.757116
MSCs	ARIH1	0.709142	-0.138988	0.201767	-0.479742	0.757401
MSCs	PRAG1	0.715077	0.185174	0.612766	-0.242419	0.760864
MSCs	RSRP1	0.714915	0.129312	0.432406	-0.173782	0.760864
MSCs	PTPRG	0.720606	-0.150775	0.263104	-0.564653	0.76387
MSCs	TOM1L2	0.719992	0.113354	0.400609	-0.1739	0.76387
MSCs	RANBP9	0.730276	0.100628	0.36197	-0.160714	0.77267
MSCs	USP9Y	0.735047	0.0761449	0.353873	-0.201583	0.776264
MSCs	ABCB1	0.745416	0.0945855	0.488242	-0.299071	0.785746
MSCs	NT5C2	0.753693	-0.140618	0.248621	-0.529858	0.792992
MSCs	PI4KA	0.75704	0.131544	0.480105	-0.217016	0.795033
MSCs	B4GALT5	0.762223	-0.151609	0.254759	-0.557977	0.798991
MSCs	PPP3CA	0.767082	0.0640176	0.42598	-0.297945	0.802595
MSCs	ITGBL1	0.772311	0.0787122	0.425719	-0.268295	0.806572
MSCs	LUC7L3	0.774485	-0.0784798	0.228964	-0.385924	0.80735
MSCs	KIAA2026	0.81426	0.0704137	0.298168	-0.15734	0.84725
MSCs	TIMP3	0.81945	0.0670481	0.391548	-0.257452	0.851083
MSCs	LIMS1	0.829708	-0.0825296	0.210723	-0.375782	0.860156
MSCs	CHD6	0.832811	-0.09059	0.204628	-0.385808	0.861791
MSCs	RNPC3	0.845567	-0.0321679	0.223984	-0.28832	0.873392
MSCs	ACBD6	0.856189	0.017158	0.26081	-0.226494	0.88275
MSCs	YBX3	0.866692	-0.0239971	0.455619	-0.503613	0.891951
MSCs	UNC13B	0.871936	-0.0683465	0.359961	-0.496654	0.895716
MSCs	MBP	0.877153	0.0643	0.308946	-0.180346	0.89944
MSCs	TSC22D1	0.900914	0.0902816	0.472569	-0.292006	0.922131
MSCs	EZR	0.903868	-0.0173709	0.450018	-0.484759	0.923482
MSCs	BMP6	0.906488	0.0624054	0.361023	-0.236212	0.924487
MSCs	RASAL2	0.914868	-0.0395508	0.274898	-0.354	0.931352
MSCs	CLIP1	0.91793	-0.0800909	0.29514	-0.455322	0.932788
MSCs	AC008014.1	0.928908	0.131559	0.796707	-0.533589	0.942249
MSCs	GABPB1-AS1	0.949143	0.0334093	0.272348	-0.205529	0.96105
MSCs	BMPR1B	0.954387	0.0814738	0.624075	-0.461127	0.964631
MSCs	IGFBP5	0.956527	-0.0561371	0.479857	-0.592131	0.965067
MSCs	TACC1	0.963222	-0.0492826	0.472271	-0.570836	0.97009
MSCs	LRP1B	0.968996	#N/A	#N/A	#N/A	0.973476
MSCs	NHS	0.97003	-0.0166284	0.409428	-0.442685	0.973476
MSCs	SEMA3C	0.972413	0.0258781	0.533554	-0.481798	0.974137
MSCs	NR2F1	0.984535	-0.0410121	0.425081	-0.507105	0.984535

## Sheet: Pericytes
cluster	primerid	Pr..Chisq.	coef	ci.hi	ci.lo	fdr
Pericytes	ITGA1	0.00011446	0.273536	0.445652	0.10142	0.0106448
Pericytes	RUNX1T1	0.000305826	0.332587	0.487806	0.177368	0.010951
Pericytes	TXNIP	0.000353258	0.486733	0.724822	0.248643	0.010951
Pericytes	DOCK9	0.00102132	-0.296112	-0.145815	-0.446409	0.0189966
Pericytes	ERCC6L2	0.000922743	0.204861	0.331781	0.0779408	0.0189966
Pericytes	LRBA	0.00130177	0.269334	0.466365	0.0723035	0.0201775
Pericytes	CCDC91	0.00157574	0.154938	0.272293	0.0375828	0.0209348
Pericytes	ASAP1	0.00225879	0.136763	0.320736	-0.0472096	0.0210067
Pericytes	METTL15	0.00210224	0.144614	0.247406	0.0418227	0.0210067
Pericytes	VCL	0.00221489	0.22873	0.449351	0.00810858	0.0210067
Pericytes	MCAM	0.00500435	0.194742	0.311985	0.0774998	0.0423095
Pericytes	KCNT2	0.0101422	0.258891	0.415891	0.101891	0.0680734
Pericytes	RGS6	0.0104806	0.171167	0.324315	0.0180197	0.0680734
Pericytes	RNF213	0.0109796	-0.313951	-0.120863	-0.507038	0.0680734
Pericytes	TIMP3	0.00962722	0.118064	0.374128	-0.137999	0.0680734
Pericytes	DIP2B	0.0135948	-0.180339	-0.0648002	-0.295877	0.0743717
Pericytes	MAML2	0.0128115	0.202908	0.354003	0.0518133	0.0743717
Pericytes	GRID1	0.0165808	0.206072	0.376833	0.0353115	0.0772563
Pericytes	MLLT3	0.0166142	0.146169	0.299905	-0.00756673	0.0772563
Pericytes	PAM	0.0151684	0.19655	0.330035	0.0630643	0.0772563
Pericytes	MT-ND2	0.0206101	0.192687	0.396616	-0.0112414	0.0823337
Pericytes	MYH9	0.0238785	0.170103	0.369859	-0.0296523	0.0823337
Pericytes	NHS	0.0190119	-0.24526	-0.0715646	-0.418955	0.0823337
Pericytes	SH3D19	0.021354	0.217193	0.378082	0.0563049	0.0823337
Pericytes	SPATA6	0.0225941	0.148992	0.255608	0.0423751	0.0823337
Pericytes	STIM1	0.0239033	0.150735	0.254344	0.0471263	0.0823337
Pericytes	USP15	0.0238733	-0.221031	-0.076776	-0.365286	0.0823337
Pericytes	FOCAD	0.0269148	0.177455	0.308601	0.0463091	0.0863129
Pericytes	TTN	0.026018	-0.336176	-0.0999917	-0.57236	0.0863129
Pericytes	FIGN	0.0296886	0.176672	0.329415	0.0239299	0.0918554
Pericytes	NAV3	0.0306185	0.0697168	0.185196	-0.0457622	0.0918554
Pericytes	ADAM17	0.03231	-0.134157	-0.0327063	-0.235607	0.0939009
Pericytes	DYNC1I1	0.0357813	0.293157	0.508617	0.0776976	0.0956853
Pericytes	GNAS	0.0380683	-0.186137	-0.050696	-0.321579	0.0956853
Pericytes	GRM8	0.0364878	0.324801	0.591789	0.0578118	0.0956853
Pericytes	MSC-AS1	0.0374352	0.225697	0.408003	0.04339	0.0956853
Pericytes	MT-ND3	0.0342089	0.268948	0.591247	-0.0533504	0.0956853
Pericytes	MT-ND4	0.0403029	0.299788	0.613963	-0.014387	0.096107
Pericytes	ST5	0.0396316	0.152254	0.419454	-0.114946	0.096107
Pericytes	L3MBTL4	0.0416167	-0.202599	-0.0366466	-0.368552	0.0967589
Pericytes	KLHL23	0.042974	0.20226	0.380229	0.0242911	0.0974777
Pericytes	DCN	0.0497086	0.18936	0.414216	-0.0354959	0.104206
Pericytes	GGT5	0.0473809	0.15812	0.3427	-0.0264613	0.104206
Pericytes	HEY2	0.0504224	0.102391	0.205038	-0.00025517	0.104206
Pericytes	WWP2	0.0483603	-0.16751	-0.0363511	-0.298669	0.104206
Pericytes	MAP2	0.0551753	0.214568	0.404482	0.0246539	0.11155
Pericytes	CDS2	0.0575098	-0.150449	-0.0275234	-0.273375	0.113796
Pericytes	HIF1A	0.0619577	-0.231318	-0.0365068	-0.426129	0.119119
Pericytes	PARD3B	0.0627615	0.114431	0.266991	-0.0381297	0.119119
Pericytes	DOCK5	0.0726081	0.129277	0.253152	0.00540181	0.135051
Pericytes	TBC1D4	0.0795017	0.101964	0.215071	-0.0111427	0.144974
Pericytes	XAF1	0.0972655	-0.239386	-0.0288112	-0.44996	0.173956
Pericytes	KCNIP4	0.109348	-0.176353	-0.00812143	-0.344585	0.191875
Pericytes	MAGI1	0.134471	0.108668	0.280793	-0.0634559	0.231589
Pericytes	CAMK1D	0.146347	-0.213921	-0.00778824	-0.420055	0.247459
Pericytes	ITGA7	0.151735	-0.204464	-0.000615993	-0.408312	0.247567
Pericytes	MAPK10	0.149635	0.119024	0.319469	-0.0814217	0.247567
Pericytes	PLEKHG3	0.159225	0.14429	0.317403	-0.0288234	0.25531
Pericytes	FAM214A	0.167678	0.101702	0.205895	-0.0024908	0.264307
Pericytes	RBMS3-AS3	0.171972	-0.18987	0.0517569	-0.431498	0.266557
Pericytes	CYSLTR2	0.177147	0.113952	0.241521	-0.0136179	0.270076
Pericytes	MYOF	0.184874	-0.185712	0.0109758	-0.382399	0.277311
Pericytes	DMD	0.191826	0.165505	0.388301	-0.0572911	0.278746
Pericytes	ERBB4	0.191083	0.12393	0.287031	-0.0391712	0.278746
Pericytes	FP671120.1	0.209288	-0.108239	0.200446	-0.416924	0.294906
Pericytes	PDE1C	0.206688	0.256499	0.533576	-0.0205774	0.294906
Pericytes	AL138828.1	0.239481	-0.19592	0.0871528	-0.478994	0.327525
Pericytes	SP100	0.237387	-0.157816	0.0468921	-0.362525	0.327525
Pericytes	ROBO2	0.24956	0.0709935	0.337989	-0.196002	0.336364
Pericytes	HIGD1B	0.262624	-0.119025	0.046832	-0.284883	0.348915
Pericytes	XIST	0.28618	-6.02774e-05	0.000256608	-0.000377162	0.374856
Pericytes	CLIP2	0.297053	-0.158747	0.0585923	-0.376087	0.383694
Pericytes	AL356258.1	0.324534	-0.159158	0.0773925	-0.395709	0.406039
Pericytes	CCDC102B	0.326414	0.165275	0.41721	-0.0866597	0.406039
Pericytes	CNTN1	0.327451	0.0737609	0.285351	-0.137829	0.406039
Pericytes	ASCC3	0.356168	-0.129439	0.0452572	-0.304134	0.433163
Pericytes	PARP14	0.35864	-0.116161	0.118012	-0.350333	0.433163
Pericytes	APOLD1	0.381881	0.0368333	0.261555	-0.187888	0.45532
Pericytes	DAB1	0.392631	0.0856701	0.297881	-0.12654	0.462211
Pericytes	NXN	0.439674	-0.0999336	0.0998664	-0.299734	0.504811
Pericytes	SLC6A1-AS1	0.434465	-0.40724	0.20452	-1.019	0.504811
Pericytes	NFE2L2	0.457791	-0.0757098	0.0438865	-0.195306	0.519202
Pericytes	ATP1B3	0.500833	-0.132587	0.16587	-0.431044	0.561174
Pericytes	MTRNR2L12	0.511066	-0.200652	0.140399	-0.541703	0.565823
Pericytes	COL24A1	0.52038	0.156107	0.490283	-0.178068	0.569357
Pericytes	KAZN	0.532534	-0.172277	0.213336	-0.55789	0.57588
Pericytes	KALRN	0.600789	0.105952	0.366232	-0.154327	0.642223
Pericytes	B2M	0.681087	-0.10371	0.132078	-0.339498	0.719785
Pericytes	AFF3	0.723275	0.0875014	0.324771	-0.149769	0.755782
Pericytes	PITPNC1	0.735271	-0.117802	0.227341	-0.462944	0.75978
Pericytes	SAMD4A	0.769756	-0.0513169	0.142182	-0.244815	0.786673
Pericytes	ELL2	0.917234	0.000169138	0.284413	-0.284075	0.927204
Pericytes	LRP1B	0.972902	-0.022166	0.179503	-0.223835	0.972902

## Sheet: SMCs
cluster	primerid	Pr..Chisq.	coef	ci.hi	ci.lo	fdr
SMCs	CYTH3	0.00139683	-0.400852	-0.17187	-0.629834	0.184607
SMCs	DDX17	0.00161936	-0.506852	-0.247398	-0.766306	0.184607
SMCs	BCL2	0.0413998	-0.279021	-0.0150527	-0.542989	0.253507
SMCs	CARMIL1	0.0222075	0.330586	0.656078	0.00509462	0.253507
SMCs	DDX5	0.00731226	-0.417544	-0.150767	-0.68432	0.253507
SMCs	DLC1	0.0413991	-0.487941	-0.122548	-0.853334	0.253507
SMCs	FARP1	0.0114856	-0.373951	-0.110442	-0.63746	0.253507
SMCs	FCHSD2	0.0422511	0.338662	0.619887	0.0574375	0.253507
SMCs	GLIS3	0.0288752	0.357071	0.629111	0.0850317	0.253507
SMCs	GNB1	0.0368807	-0.30098	-0.0531661	-0.548794	0.253507
SMCs	IGF1R	0.0377419	0.362902	0.663246	0.0625583	0.253507
SMCs	INSR	0.0204445	0.325783	0.53294	0.118625	0.253507
SMCs	LDLRAD4	0.0368678	-0.266399	0.055761	-0.58856	0.253507
SMCs	LINC00486	0.0338145	-0.304097	-0.0697214	-0.538472	0.253507
SMCs	MACF1	0.00457466	0.469636	0.853831	0.08544	0.253507
SMCs	MT-CO1	0.025062	-0.359296	-0.115969	-0.602622	0.253507
SMCs	MTR	0.0106187	0.303937	0.500804	0.107071	0.253507
SMCs	MTRNR2L12	0.0281082	-0.423501	-0.0948859	-0.752117	0.253507
SMCs	NTN4	0.0232886	-0.0854278	0.249952	-0.420807	0.253507
SMCs	PAWR	0.0152303	-0.305206	-0.0868765	-0.523535	0.253507
SMCs	PDE4D	0.0401511	0.631837	1.11879	0.14488	0.253507
SMCs	PDLIM5	0.0147036	0.0941428	0.416559	-0.228273	0.253507
SMCs	PLPP3	0.0275996	0.234224	0.517661	-0.0492126	0.253507
SMCs	PRDM16	0.0289184	0.350882	0.580129	0.121634	0.253507
SMCs	PTPRK	0.0155914	-0.628405	-0.209737	-1.04707	0.253507
SMCs	RB1CC1	0.0266043	-0.276619	-0.0725669	-0.48067	0.253507
SMCs	SCAF11	0.0259098	0.188329	0.405879	-0.0292208	0.253507
SMCs	SLC38A11	0.013698	-0.813981	-0.263698	-1.36426	0.253507
SMCs	SMURF1	0.0406512	0.346141	0.617945	0.0743371	0.253507
SMCs	SORBS1	0.0301896	0.533566	0.945728	0.121404	0.253507
SMCs	SSBP3	0.0146769	0.448529	0.804965	0.0920938	0.253507
SMCs	ST7	0.0303448	0.290279	0.479368	0.10119	0.253507
SMCs	TEAD1	0.0208491	-0.34408	-0.115041	-0.57312	0.253507
SMCs	TJP1	0.0420383	0.382676	0.746482	0.0188702	0.253507
SMCs	TPM4	0.0317613	0.347312	0.73409	-0.0394662	0.253507
SMCs	VPS13C	0.0141295	-0.397497	-0.167665	-0.627329	0.253507
SMCs	WSB1	0.00680333	0.429631	0.690699	0.168564	0.253507
SMCs	ZBTB38	0.0116011	0.176553	0.351345	0.00176072	0.253507
SMCs	N4BP2L2	0.0440836	-0.358651	-0.0895734	-0.627729	0.25772
SMCs	ASCC3	0.0472467	-0.249109	-0.0292169	-0.469002	0.260979
SMCs	SPTBN1	0.0479077	-0.370498	-0.0933238	-0.647671	0.260979
SMCs	USP47	0.0480751	0.200585	0.483325	-0.0821555	0.260979
SMCs	CDK13	0.0509418	-0.275868	-0.0446863	-0.50705	0.268581
SMCs	TTC3	0.0518315	-0.310356	-0.0820133	-0.538699	0.268581
SMCs	ADARB1	0.061039	0.273605	0.507642	0.0395679	0.268674
SMCs	AKAP12	0.0592414	0.497129	1.06942	-0.0751646	0.268674
SMCs	ARHGEF12	0.0781755	-0.255316	0.00179489	-0.512426	0.268674
SMCs	ATP1A2	0.0773375	-0.28988	0.0864529	-0.666214	0.268674
SMCs	ATP8B1	0.0779244	0.238264	0.428997	0.0475302	0.268674
SMCs	COBLL1	0.0772584	-0.389977	0.00528972	-0.785243	0.268674
SMCs	GPC5	0.0676155	-0.369925	0.00425037	-0.7441	0.268674
SMCs	GSK3B	0.0684131	0.0898909	0.342199	-0.162417	0.268674
SMCs	HIPK2	0.0585426	0.402977	0.755771	0.0501835	0.268674
SMCs	L3MBTL4	0.0706235	-0.414229	-0.0203202	-0.808137	0.268674
SMCs	LARGE1	0.0658769	0.283508	0.515311	0.0517058	0.268674
SMCs	MTMR3	0.0738086	-0.22981	-0.0216551	-0.437964	0.268674
SMCs	MYH9	0.0552173	0.396649	0.759009	0.0342899	0.268674
SMCs	MYO1B	0.0635206	-0.436973	-0.0575236	-0.816423	0.268674
SMCs	MYOF	0.0595126	0.302512	0.584636	0.0203888	0.268674
SMCs	PPFIA2	0.0674969	0.230097	0.428613	0.0315802	0.268674
SMCs	PPP3CA	0.0671364	0.289917	0.529018	0.0508153	0.268674
SMCs	PPP6R3	0.0703735	-0.236566	0.0190403	-0.492172	0.268674
SMCs	RBM39	0.05781	-0.244523	-0.0337927	-0.455253	0.268674
SMCs	THOC2	0.0786047	-0.265665	0.00710117	-0.538431	0.268674
SMCs	WDR60	0.0667506	-0.273569	-0.0572352	-0.489903	0.268674
SMCs	ZBTB7C	0.0741581	-0.413241	-0.0508221	-0.775661	0.268674
SMCs	ZEB1	0.0789525	-0.313774	0.0180104	-0.645559	0.268674
SMCs	ARID4B	0.102128	0.26182	0.551221	-0.0275822	0.270759
SMCs	ATP2B4	0.0983809	0.191377	0.397054	-0.0143013	0.270759
SMCs	CACNB2	0.0879109	0.391066	0.684389	0.0977425	0.270759
SMCs	CLIC4	0.0973806	0.142095	0.358365	-0.0741742	0.270759
SMCs	CTNNA3	0.0997582	-0.324653	0.0771033	-0.726409	0.270759
SMCs	EDIL3	0.0957486	0.380631	0.711585	0.0496782	0.270759
SMCs	ELL2	0.0986826	0.539435	1.00196	0.0769112	0.270759
SMCs	FOXK2	0.0923717	0.228601	0.426408	0.0307933	0.270759
SMCs	GOLGA4	0.0867047	0.286374	0.551819	0.0209286	0.270759
SMCs	HIP1	0.0828043	0.160591	0.571469	-0.250287	0.270759
SMCs	IMMP2L	0.101255	0.295275	0.586071	0.00447836	0.270759
SMCs	MACROD2	0.0868864	0.272022	0.497793	0.0462503	0.270759
SMCs	NBEAL1	0.0808601	-0.442426	-0.0900691	-0.794783	0.270759
SMCs	PDGFRB	0.097396	-0.497683	-0.0768145	-0.918552	0.270759
SMCs	PDLIM3	0.0864659	0.284946	0.522238	0.0476538	0.270759
SMCs	RB1	0.0894057	-0.262072	-0.0521	-0.472044	0.270759
SMCs	SH3RF3	0.0910251	0.436227	0.816555	0.0558994	0.270759
SMCs	XIST	0.0902444	-0.000297034	0.00132191	-0.00191598	0.270759
SMCs	ZNF638	0.098881	0.315149	0.577066	0.0532312	0.270759
SMCs	PCGF5	0.104168	0.231199	0.447675	0.0147237	0.272992
SMCs	DMD	0.109176	0.322885	0.624654	0.0211158	0.282864
SMCs	MYOCD	0.11095	0.239019	0.475729	0.00230939	0.284232
SMCs	FBXO32	0.114184	0.243619	0.459483	0.0277555	0.287871
SMCs	MAST4	0.11596	-0.256406	-0.00854175	-0.504271	0.287871
SMCs	PPP2R5E	0.116158	-0.210915	-0.00683182	-0.414999	0.287871
SMCs	EXOC4	0.120299	0.130358	0.401417	-0.140702	0.294927
SMCs	DGKH	0.124549	-0.0111177	0.282421	-0.304656	0.297237
SMCs	NCOA2	0.125152	-0.304642	0.0181134	-0.627398	0.297237
SMCs	PNISR	0.122952	-0.246894	0.0273578	-0.521145	0.297237
SMCs	PRKCE	0.12818	0.185319	0.372068	-0.00143003	0.298214
SMCs	SLCO3A1	0.127887	-0.395013	-0.0190033	-0.771023	0.298214
SMCs	AKAP6	0.13307	0.397833	0.787135	0.0085311	0.303399
SMCs	ATF3	0.132849	-0.383562	0.0106329	-0.777756	0.303399
SMCs	ANO6	0.142284	0.180531	0.510461	-0.149399	0.314404
SMCs	CCNH	0.143412	0.281781	0.604055	-0.0404927	0.314404
SMCs	SMG6	0.140894	0.194085	0.399687	-0.011517	0.314404
SMCs	TNRC18	0.139706	0.104486	0.329205	-0.120234	0.314404
SMCs	MAGI1	0.146409	0.245265	0.597992	-0.107463	0.317916
SMCs	PHLPP1	0.149347	-0.180762	0.0894503	-0.450974	0.321236
SMCs	FGD4	0.15224	0.23847	0.470656	0.00628405	0.322634
SMCs	SLC22A3	0.153384	-0.179781	0.125371	-0.484934	0.322634
SMCs	SVIL	0.154242	0.126463	0.397168	-0.144242	0.322634
SMCs	LPP	0.159157	0.262902	0.574732	-0.0489276	0.329889
SMCs	ZBTB16	0.163997	0.503228	1.13924	-0.13278	0.336858
SMCs	ITM2B	0.166708	-0.313981	0.0108851	-0.638846	0.33937
SMCs	COL4A2	0.170946	0.426273	0.924203	-0.0716571	0.344919
SMCs	ARGLU1	0.180768	-0.308493	0.0178884	-0.634875	0.34928
SMCs	BACH1	0.177364	-0.415519	0.0594148	-0.890453	0.34928
SMCs	DPYD	0.178625	-0.217888	0.177967	-0.613743	0.34928
SMCs	POU2F1	0.179344	-0.189162	0.0200613	-0.398386	0.34928
SMCs	SLMAP	0.176159	0.184527	0.424384	-0.0553303	0.34928
SMCs	LSAMP	0.189248	-0.299392	0.0201493	-0.618933	0.360063
SMCs	SRRM2	0.189507	-0.356021	0.0143607	-0.726403	0.360063
SMCs	LTBP1	0.1928	0.324567	0.723108	-0.0739736	0.363292
SMCs	ZRANB2	0.202572	-0.184408	0.0250628	-0.393878	0.378578
SMCs	CBL	0.21028	0.0396129	0.317319	-0.238093	0.387461
SMCs	DGKB	0.217522	-0.428293	0.0639514	-0.920537	0.387461
SMCs	HABP4	0.212773	0.197783	0.411619	-0.0160538	0.387461
SMCs	NXN	0.217442	0.146594	0.407992	-0.114804	0.387461
SMCs	PPP1CB	0.2116	0.166476	0.463357	-0.130406	0.387461
SMCs	STK39	0.214433	0.137453	0.42683	-0.151923	0.387461
SMCs	MSC-AS1	0.223005	-0.218726	0.0302131	-0.467665	0.391117
SMCs	NRXN3	0.222583	-0.128628	0.109975	-0.367232	0.391117
SMCs	TRIO	0.225534	0.237448	0.516835	-0.0419398	0.392533
SMCs	CEP350	0.230809	-0.173589	0.0379425	-0.385121	0.398125
SMCs	EPC1	0.232239	-0.167606	0.0397454	-0.374958	0.398125
SMCs	NFIB	0.234813	-0.23652	0.0251636	-0.498203	0.399533
SMCs	ARHGAP32	0.240619	-0.193128	0.040721	-0.426978	0.400445
SMCs	GULP1	0.238518	0.0940511	0.292244	-0.104142	0.400445
SMCs	SRSF11	0.240423	0.160775	0.324322	-0.00277197	0.400445
SMCs	RBMS1	0.249374	0.319742	0.698059	-0.0585745	0.412008
SMCs	BCL6	0.273089	0.186696	0.428054	-0.054662	0.432391
SMCs	DANT2	0.269992	0.133833	0.394033	-0.126367	0.432391
SMCs	NFASC	0.271893	-0.283022	0.0589786	-0.625023	0.432391
SMCs	SON	0.266474	-0.199244	0.0931563	-0.491644	0.432391
SMCs	SOX5	0.27188	-0.0398591	0.298156	-0.377874	0.432391
SMCs	UBE2D3	0.269462	0.168866	0.381812	-0.0440793	0.432391
SMCs	ELF2	0.282968	0.187837	0.41627	-0.0405957	0.444943
SMCs	UBR1	0.286983	0.123401	0.314698	-0.0678954	0.448165
SMCs	GRK5	0.296428	0.260885	0.675148	-0.153377	0.456659
SMCs	REV3L	0.295741	0.189198	0.462382	-0.083986	0.456659
SMCs	SLC6A1	0.302669	-0.286531	0.113928	-0.686989	0.463145
SMCs	TBCK	0.304747	0.138824	0.332961	-0.0553127	0.463216
SMCs	AGAP1	0.318776	-0.242857	0.0689507	-0.554664	0.465461
SMCs	CDH11	0.314358	-0.12737	0.134272	-0.389012	0.465461
SMCs	CHD6	0.315133	0.066022	0.251015	-0.118971	0.465461
SMCs	CSNK1A1	0.315047	0.208518	0.463551	-0.0465146	0.465461
SMCs	ERBIN	0.320515	0.110763	0.337996	-0.11647	0.465461
SMCs	MKL2	0.31864	0.158191	0.358062	-0.0416808	0.465461
SMCs	TRAK1	0.314297	-0.184962	0.0640008	-0.433924	0.465461
SMCs	CNNM2	0.328276	-0.237036	0.144421	-0.618493	0.470949
SMCs	COL14A1	0.328425	0.236748	0.539815	-0.0663186	0.470949
SMCs	ATP10A	0.334359	-0.290831	0.0933048	-0.674967	0.475143
SMCs	CAMK1D	0.345937	-0.178002	0.064359	-0.420363	0.475143
SMCs	FRMD3	0.344728	-0.253448	0.140388	-0.647283	0.475143
SMCs	GAB1	0.336523	-0.155706	0.0654011	-0.376812	0.475143
SMCs	HECTD4	0.342394	-0.15191	0.0583879	-0.362208	0.475143
SMCs	PHACTR1	0.338898	0.0637949	0.441341	-0.313751	0.475143
SMCs	SLC20A2	0.339718	-0.154559	0.1562	-0.465318	0.475143
SMCs	UTY	0.348556	0.229743	0.573288	-0.113802	0.475873
SMCs	ACTB	0.371212	0.223334	0.52219	-0.0755212	0.494166
SMCs	ARID2	0.364594	0.0896202	0.286028	-0.106788	0.494166
SMCs	SAMD4A	0.373311	-0.234006	0.113294	-0.581305	0.494166
SMCs	SIPA1L1	0.374959	0.179639	0.460601	-0.101323	0.494166
SMCs	SNX29	0.373531	0.150667	0.368721	-0.0673869	0.494166
SMCs	SORBS2	0.374351	-0.010851	0.532821	-0.554523	0.494166
SMCs	RBFOX1	0.387522	-0.196312	0.101003	-0.493627	0.507787
SMCs	MYH11	0.395902	0.383778	0.924445	-0.156889	0.515804
SMCs	SH3D19	0.41552	0.141033	0.351458	-0.0693925	0.538287
SMCs	NLGN1	0.421042	0.135322	0.377769	-0.107125	0.54236
SMCs	NRG3	0.432948	-0.0901581	0.256632	-0.436948	0.554563
SMCs	LRCH3	0.441501	-0.1291	0.0792864	-0.337487	0.562359
SMCs	CHD1	0.448218	0.151313	0.420672	-0.118046	0.567742
SMCs	ITGA1	0.459303	0.113711	0.377413	-0.149991	0.576656
SMCs	NCALD	0.460313	0.148872	0.441035	-0.143291	0.576656
SMCs	MRVI1	0.463215	0.131848	0.348721	-0.0850248	0.577121
SMCs	FAM85B	0.473138	0.156646	0.410619	-0.0973264	0.58628
SMCs	MKL1	0.496134	0.150092	0.418124	-0.11794	0.608165
SMCs	RBPMS	0.494837	0.0500108	0.297852	-0.19783	0.608165
SMCs	DIP2C	0.512272	0.156759	0.415568	-0.102051	0.624588
SMCs	FAM129A	0.526974	0.177924	0.467317	-0.11147	0.637451
SMCs	PTPRA	0.528414	-0.0264583	0.261955	-0.314872	0.637451
SMCs	AHI1	0.546843	0.083001	0.288285	-0.122283	0.650636
SMCs	CMSS1	0.542334	0.161144	0.440887	-0.118599	0.650636
SMCs	MYO6	0.547904	-0.13537	0.132688	-0.403428	0.650636
SMCs	ACTA2	0.551316	0.221115	0.601169	-0.158938	0.651295
SMCs	ITSN1	0.569151	-0.101313	0.153693	-0.356319	0.666824
SMCs	PPP2R2B	0.57031	0.0534324	0.345007	-0.238143	0.666824
SMCs	PLS3	0.582849	0.113717	0.329173	-0.101739	0.67116
SMCs	RYR2	0.577542	0.154802	0.529352	-0.219749	0.67116
SMCs	TMEM131	0.580074	0.0719331	0.282803	-0.138936	0.67116
SMCs	SYNPO2	0.59663	0.17927	0.52182	-0.163281	0.683577
SMCs	FOS	0.635733	-0.122662	0.147118	-0.392442	0.724736
SMCs	ERBB4	0.640075	0.107131	0.516984	-0.302723	0.726055
SMCs	TACC1	0.644611	0.0129663	0.496894	-0.470961	0.727581
SMCs	BABAM2	0.664395	-0.0861183	0.144413	-0.316649	0.738937
SMCs	FP236383.1	0.662051	-0.0948924	0.31512	-0.504905	0.738937
SMCs	TTLL7	0.660619	0.125219	0.421345	-0.170908	0.738937
SMCs	FMNL2	0.675244	-0.101324	0.157758	-0.360407	0.739897
SMCs	HEYL	0.678239	-0.131846	0.171368	-0.435061	0.739897
SMCs	THRB	0.675075	0.0872765	0.291306	-0.116753	0.739897
SMCs	UNC5C	0.67106	0.1911	0.612066	-0.229867	0.739897
SMCs	AC098829.1	0.695773	0.0952986	0.430464	-0.239867	0.755411
SMCs	ZNF331	0.713688	-0.0545905	0.266684	-0.375865	0.771189
SMCs	ADAMTS9	0.724327	0.249272	0.86226	-0.363716	0.778958
SMCs	EDNRA	0.727711	-0.118097	0.208126	-0.444321	0.778958
SMCs	STK24	0.731399	0.074344	0.343156	-0.194468	0.779248
SMCs	SOX6	0.737242	0.144535	0.515145	-0.226074	0.78182
SMCs	MAP4K3	0.743667	0.10328	0.361887	-0.155326	0.784982
SMCs	KCNAB1	0.750661	0.230797	0.835193	-0.373598	0.788713
SMCs	TTTY14	0.754454	0.124743	0.443377	-0.19389	0.789062
SMCs	TBL1X	0.766147	0.0877168	0.347036	-0.171602	0.797633
SMCs	KDM6A	0.801684	0.0379759	0.23877	-0.162819	0.827077
SMCs	SYT1	0.801531	-0.0642983	0.260626	-0.389223	0.827077
SMCs	SORT1	0.810341	0.0952805	0.477994	-0.287433	0.832242
SMCs	GLG1	0.833645	0.028836	0.246944	-0.189272	0.852336
SMCs	FKBP5	0.842512	-0.0242382	0.313507	-0.361983	0.857557
SMCs	ADAMTS9-AS2	0.857761	0.105981	0.483695	-0.271734	0.869198
SMCs	FP671120.1	0.868482	-0.0241055	0.426974	-0.475185	0.876168
SMCs	DLG2	0.872483	0.0653775	0.470617	-0.339862	0.876327
SMCs	DTNA	0.900227	0.00977344	0.401095	-0.381548	0.900227
