# Supplementary material for: Single-nucleus RNA sequencing of midbrain blood-brain barrier cells in schizophrenia reveals subtle transcriptional changes with overall preservation of cellular proportions and phenotypes
Source: Mol Psychiatry. 2022 Oct 3;27(11):4731–40. doi: 10.1038/s41380-022-01796-0 (PMC9734060; doi:10.1038/s41380-022-01796-0)
Supplement: Supplementary file 8 — Supplementary Table 8 [file 41380_2022_1796_MOESM8_ESM.xlsx]

## Sheet: Endo_arteries
sub-cluster	X	term_name	p_value	source	term_id	intersection_size	query_size	term_size	neg_log_p
Endo_arteries	1	transmembrane receptor protein tyrosine kinase signaling pathway	1.20504e-08	GO:BP	GO:0007169	25	114	759	7.919
Endo_arteries	2	anatomical structure morphogenesis	2.42369e-07	GO:BP	GO:0009653	46	114	2816	6.61552
Endo_arteries	3	enzyme linked receptor protein signaling pathway	2.6721e-07	GO:BP	GO:0007167	28	114	1107	6.57315
Endo_arteries	4	regulation of signaling	4.22749e-07	GO:BP	GO:0023051	53	114	3669	6.37392
Endo_arteries	5	cell surface receptor signaling pathway	5.67191e-07	GO:BP	GO:0007166	49	114	3226	6.24627
Endo_arteries	6	regulation of phosphorylation	8.42498e-07	GO:BP	GO:0042325	31	114	1419	6.07443
Endo_arteries	7	negative regulation of cellular process	8.57339e-07	GO:BP	GO:0048523	64	114	5153	6.06685
Endo_arteries	8	chemotaxis	1.17303e-06	GO:BP	GO:0006935	21	114	654	5.93069
Endo_arteries	9	taxis	1.27386e-06	GO:BP	GO:0042330	21	114	657	5.89488
Endo_arteries	10	movement of cell or subcellular component	1.43383e-06	GO:BP	GO:0006928	40	114	2319	5.8435
Endo_arteries	11	regulation of phosphorus metabolic process	1.63655e-06	GO:BP	GO:0051174	33	114	1640	5.78607
Endo_arteries	12	regulation of phosphate metabolic process	1.63655e-06	GO:BP	GO:0019220	33	114	1640	5.78607
Endo_arteries	13	cellular response to chemical stimulus	1.66495e-06	GO:BP	GO:0070887	50	114	3443	5.7786
Endo_arteries	14	locomotion	2.00363e-06	GO:BP	GO:0040011	37	114	2039	5.69818
Endo_arteries	15	circulatory system development	2.21072e-06	GO:BP	GO:0072359	28	114	1215	5.65547
Endo_arteries	16	cell migration	2.22998e-06	GO:BP	GO:0016477	33	114	1660	5.6517
Endo_arteries	17	negative regulation of signal transduction	2.47861e-06	GO:BP	GO:0009968	30	114	1394	5.60579
Endo_arteries	18	positive regulation of chemotaxis	2.77601e-06	GO:BP	GO:0050921	11	114	143	5.55658
Endo_arteries	19	cell adhesion	3.36138e-06	GO:BP	GO:0007155	31	114	1502	5.47348
Endo_arteries	20	regulation of cell communication	3.44136e-06	GO:BP	GO:0010646	51	114	3634	5.46327
Endo_arteries	21	tube development	3.63444e-06	GO:BP	GO:0035295	27	114	1158	5.43956
Endo_arteries	22	biological adhesion	3.75994e-06	GO:BP	GO:0022610	31	114	1509	5.42482
Endo_arteries	23	positive regulation of phosphorylation	4.57151e-06	GO:BP	GO:0042327	24	114	928	5.33994
Endo_arteries	24	blood vessel development	7.21387e-06	GO:BP	GO:0001568	22	114	797	5.14183
Endo_arteries	25	localization of cell	7.66004e-06	GO:BP	GO:0051674	34	114	1840	5.11577
Endo_arteries	26	cell motility	7.66004e-06	GO:BP	GO:0048870	34	114	1840	5.11577
Endo_arteries	27	tube morphogenesis	8.18716e-06	GO:BP	GO:0035239	24	114	956	5.08687
Endo_arteries	28	regulation of signal transduction	8.73149e-06	GO:BP	GO:0009966	47	114	3251	5.05891
Endo_arteries	29	cellular response to organic substance	1.17633e-05	GO:BP	GO:0071310	43	114	2821	4.92947
Endo_arteries	30	negative regulation of cell communication	1.3487e-05	GO:BP	GO:0010648	30	114	1499	4.87008
Endo_arteries	31	negative regulation of signaling	1.41226e-05	GO:BP	GO:0023057	30	114	1502	4.85008
Endo_arteries	32	phosphorylation	1.64056e-05	GO:BP	GO:0016310	35	114	1996	4.78501
Endo_arteries	33	vasculature development	1.64603e-05	GO:BP	GO:0001944	22	114	834	4.78356
Endo_arteries	34	angiogenesis	1.84724e-05	GO:BP	GO:0001525	19	114	621	4.73348
Endo_arteries	35	positive regulation of phosphate metabolic process	2.07698e-05	GO:BP	GO:0045937	24	114	1003	4.68257
Endo_arteries	36	positive regulation of phosphorus metabolic process	2.07698e-05	GO:BP	GO:0010562	24	114	1003	4.68257
Endo_arteries	37	regulation of cell migration	2.28567e-05	GO:BP	GO:0030334	24	114	1008	4.64099
Endo_arteries	38	anatomical structure development	3.06628e-05	GO:BP	GO:0048856	68	114	6164	4.51339
Endo_arteries	39	blood vessel morphogenesis	3.24814e-05	GO:BP	GO:0048514	20	114	715	4.48836
Endo_arteries	40	regulation of locomotion	3.41546e-05	GO:BP	GO:0040012	25	114	1113	4.46655
Endo_arteries	41	regulation of chemotaxis	3.62233e-05	GO:BP	GO:0050920	12	114	228	4.44101
Endo_arteries	42	signaling	3.67364e-05	GO:BP	GO:0023052	73	114	6937	4.4349
Endo_arteries	43	anatomical structure formation involved in morphogenesis	4.06028e-05	GO:BP	GO:0048646	26	114	1209	4.39144
Endo_arteries	44	cell communication	4.34568e-05	GO:BP	GO:0007154	73	114	6961	4.36194
Endo_arteries	45	regulation of response to stimulus	4.39194e-05	GO:BP	GO:0048583	55	114	4416	4.35734
Endo_arteries	46	regulation of cell population proliferation	4.52517e-05	GO:BP	GO:0042127	32	114	1774	4.34436
Endo_arteries	47	developmental process	5.03278e-05	GO:BP	GO:0032502	71	114	6678	4.29819
Endo_arteries	48	cellular response to growth factor stimulus	5.86725e-05	GO:BP	GO:0071363	20	114	741	4.23157
Endo_arteries	49	endothelial cell migration	6.3375e-05	GO:BP	GO:0043542	13	114	291	4.19808
Endo_arteries	50	regulation of cellular component movement	6.38105e-05	GO:BP	GO:0051270	25	114	1149	4.19511
Endo_arteries	51	phosphate-containing compound metabolic process	6.63122e-05	GO:BP	GO:0006796	43	114	2987	4.17841
Endo_arteries	52	regulation of cell motility	7.13509e-05	GO:BP	GO:2000145	24	114	1070	4.1466
Endo_arteries	53	intracellular signal transduction	7.62747e-05	GO:BP	GO:0035556	42	114	2886	4.11762
Endo_arteries	54	negative regulation of biological process	8.01134e-05	GO:BP	GO:0048519	65	114	5861	4.0963
Endo_arteries	55	signal transduction	8.13213e-05	GO:BP	GO:0007165	69	114	6447	4.0898
Endo_arteries	56	phosphorus metabolic process	8.66461e-05	GO:BP	GO:0006793	43	114	3014	4.06225
Endo_arteries	57	negative regulation of response to stimulus	0.000102911	GO:BP	GO:0048585	33	114	1938	3.98754
Endo_arteries	58	response to growth factor	0.000107812	GO:BP	GO:0070848	20	114	769	3.96733
Endo_arteries	59	cell population proliferation	0.000125039	GO:BP	GO:0008283	34	114	2057	3.90295
Endo_arteries	60	cell chemotaxis	0.000132812	GO:BP	GO:0060326	13	114	310	3.87676
Endo_arteries	61	system development	0.000139091	GO:BP	GO:0048731	59	114	5095	3.8567
Endo_arteries	62	circulatory system process	0.000139128	GO:BP	GO:0003013	18	114	632	3.85658
Endo_arteries	63	multicellular organism development	0.000158539	GO:BP	GO:0007275	63	114	5670	3.79986
Endo_arteries	64	protein phosphorylation	0.000161009	GO:BP	GO:0006468	30	114	1673	3.79315
Endo_arteries	65	regulation of protein modification process	0.000188516	GO:BP	GO:0031399	30	114	1685	3.72465
Endo_arteries	66	tissue development	0.000190799	GO:BP	GO:0009888	34	114	2093	3.71942
Endo_arteries	67	response to organic substance	0.00019501	GO:BP	GO:0010033	46	114	3457	3.70994
Endo_arteries	68	regulation of multicellular organismal process	0.000242559	GO:BP	GO:0051239	41	114	2888	3.61518
Endo_arteries	69	caveola	0.000282631	GO:CC	GO:0005901	7	118	83	3.54878
Endo_arteries	70	cellular response to stimulus	0.000286632	GO:BP	GO:0051716	77	114	7873	3.54267
Endo_arteries	71	regulation of localization	0.000288513	GO:BP	GO:0032879	41	114	2906	3.53984
Endo_arteries	72	regulation of protein phosphorylation	0.000304292	GO:BP	GO:0001932	25	114	1246	3.51671
Endo_arteries	73	cell periphery	0.000310264	GO:CC	GO:0071944	64	118	6178	3.50827
Endo_arteries	74	positive regulation of cell population proliferation	0.000311441	GO:BP	GO:0008284	22	114	985	3.50662
Endo_arteries	75	animal organ morphogenesis	0.000359256	GO:BP	GO:0009887	23	114	1079	3.4446
Endo_arteries	76	positive regulation of protein modification process	0.000390018	GO:BP	GO:0031401	23	114	1084	3.40892
Endo_arteries	77	regulation of molecular function	0.000457858	GO:BP	GO:0065009	43	114	3191	3.33927
Endo_arteries	78	positive regulation of protein phosphorylation	0.000501756	GO:BP	GO:0001934	20	114	846	3.29951
Endo_arteries	79	multicellular organismal process	0.000632571	GO:BP	GO:0032501	77	114	8000	3.19889
Endo_arteries	80	extracellular matrix organization	0.000661412	GO:BP	GO:0030198	14	114	419	3.17953
Endo_arteries	81	extracellular structure organization	0.000680657	GO:BP	GO:0043062	14	114	420	3.16707
Endo_arteries	82	external encapsulating structure organization	0.000720666	GO:BP	GO:0045229	14	114	422	3.14227
Endo_arteries	83	collagen-containing extracellular matrix	0.000742472	GO:CC	GO:0062023	13	118	421	3.12932
Endo_arteries	84	cell-substrate adhesion	0.000949557	GO:BP	GO:0031589	13	114	368	3.02248
Endo_arteries	85	epithelial cell migration	0.00104065	GO:BP	GO:0010631	13	114	371	2.98269
Endo_arteries	86	epithelium migration	0.00113949	GO:BP	GO:0090132	13	114	374	2.94329
Endo_arteries	87	response to endogenous stimulus	0.00114283	GO:BP	GO:0009719	29	114	1729	2.94202
Endo_arteries	88	cell junction	0.00115319	GO:CC	GO:0030054	31	118	2107	2.9381
Endo_arteries	89	tissue migration	0.00136269	GO:BP	GO:0090130	13	114	380	2.8656
Endo_arteries	90	regulation of protein metabolic process	0.00188887	GO:BP	GO:0051246	38	114	2759	2.7238
Endo_arteries	91	localization	0.00203392	GO:BP	GO:0051179	69	114	6938	2.69167
Endo_arteries	92	regulation of intracellular signal transduction	0.00205591	GO:BP	GO:1902531	30	114	1883	2.687
Endo_arteries	93	positive regulation of locomotion	0.00218452	GO:BP	GO:0040017	16	114	607	2.66064
Endo_arteries	94	plasma membrane raft	0.00253193	GO:CC	GO:0044853	7	118	115	2.59655
Endo_arteries	95	neurogenesis	0.00263697	GO:BP	GO:0022008	28	114	1698	2.57889
Endo_arteries	96	regulation of catalytic activity	0.00265073	GO:BP	GO:0050790	35	114	2452	2.57664
Endo_arteries	97	response to chemical	0.00279886	GO:BP	GO:0042221	54	114	4829	2.55302
Endo_arteries	98	blood circulation	0.0030445	GO:BP	GO:0008015	15	114	548	2.51648
Endo_arteries	99	columnar/cuboidal epithelial cell differentiation	0.00314614	GO:BP	GO:0002065	7	114	92	2.50222
Endo_arteries	100	response to oxygen levels	0.00317599	GO:BP	GO:0070482	13	114	410	2.49812
Endo_arteries	101	endothelial cell chemotaxis	0.00320557	GO:BP	GO:0035767	5	114	33	2.49409
Endo_arteries	102	positive regulation of endothelial cell chemotaxis	0.00331293	GO:BP	GO:2001028	4	114	15	2.47979
Endo_arteries	103	regulation of cellular protein metabolic process	0.00335662	GO:BP	GO:0032268	36	114	2591	2.4741
Endo_arteries	104	negative regulation of molecular function	0.0034039	GO:BP	GO:0044092	23	114	1228	2.46802
Endo_arteries	105	extracellular matrix	0.00352208	GO:CC	GO:0031012	14	118	562	2.4532
Endo_arteries	106	wound healing	0.0035597	GO:BP	GO:0042060	15	114	555	2.44859
Endo_arteries	107	nervous system development	0.00358735	GO:BP	GO:0007399	35	114	2484	2.44523
Endo_arteries	108	external encapsulating structure	0.00359318	GO:CC	GO:0030312	14	118	563	2.44452
Endo_arteries	109	calcium ion binding	0.00363906	GO:MF	GO:0005509	16	114	723	2.43901
Endo_arteries	110	negative regulation of intracellular signal transduction	0.00380352	GO:BP	GO:1902532	15	114	558	2.41981
Endo_arteries	111	animal organ development	0.00408026	GO:BP	GO:0048513	45	114	3701	2.38931
Endo_arteries	112	regulation of developmental process	0.00441029	GO:BP	GO:0050793	36	114	2621	2.35553
Endo_arteries	113	regulation of cellular process	0.00458237	GO:BP	GO:0050794	95	114	11517	2.33891
Endo_arteries	114	response to oxygen-containing compound	0.00466247	GO:BP	GO:1901700	28	114	1748	2.33138
Endo_arteries	115	blood vessel endothelial cell migration	0.00481496	GO:BP	GO:0043534	9	114	187	2.31741
Endo_arteries	116	regulation of biological process	0.00489602	GO:BP	GO:0050789	98	114	12122	2.31016
Endo_arteries	117	cell differentiation	0.00558988	GO:BP	GO:0030154	50	114	4392	2.2526
Endo_arteries	118	regulation of endothelial cell migration	0.00560923	GO:BP	GO:0010594	10	114	244	2.2511
Endo_arteries	119	cellular response to endogenous stimulus	0.00615441	GO:BP	GO:0071495	25	114	1467	2.21081
Endo_arteries	120	regulation of kinase activity	0.00761776	GO:BP	GO:0043549	19	114	920	2.11817
Endo_arteries	121	positive regulation of cell motility	0.00782014	GO:BP	GO:2000147	15	114	592	2.10679
Endo_arteries	122	signaling receptor binding	0.00801287	GO:MF	GO:0005102	24	114	1551	2.09621
Endo_arteries	123	positive regulation of response to external stimulus	0.00801342	GO:BP	GO:0032103	14	114	518	2.09618
Endo_arteries	124	heart development	0.00883259	GO:BP	GO:0007507	15	114	598	2.05391
Endo_arteries	125	positive regulation of cell communication	0.00904932	GO:BP	GO:0010647	28	114	1809	2.04338
Endo_arteries	126	cellular developmental process	0.00941178	GO:BP	GO:0048869	50	114	4468	2.02633
Endo_arteries	127	positive regulation of signaling	0.00954049	GO:BP	GO:0023056	28	114	1814	2.02043
Endo_arteries	128	positive regulation of cellular process	0.00973568	GO:BP	GO:0048522	60	114	5863	2.01163
Endo_arteries	129	positive regulation of response to stimulus	0.0100173	GO:BP	GO:0048584	33	114	2368	1.99925
Endo_arteries	130	positive regulation of cellular component movement	0.0101607	GO:BP	GO:0051272	15	114	605	1.99308
Endo_arteries	131	sprouting angiogenesis	0.0101985	GO:BP	GO:0002040	9	114	205	1.99147
Endo_arteries	132	positive regulation of kinase activity	0.0112158	GO:BP	GO:0033674	15	114	610	1.95017
Endo_arteries	133	protein dimerization activity	0.0114123	GO:MF	GO:0046983	19	114	1073	1.94263
Endo_arteries	134	positive regulation of endothelial cell proliferation	0.0124445	GO:BP	GO:0001938	7	114	113	1.90502
Endo_arteries	135	cell adhesion molecule binding	0.0124971	GO:MF	GO:0050839	13	114	544	1.90319
Endo_arteries	136	regulation of anatomical structure morphogenesis	0.0134465	GO:BP	GO:0022603	20	114	1048	1.87139
Endo_arteries	137	response to external stimulus	0.0138632	GO:BP	GO:0009605	39	114	3114	1.85814
Endo_arteries	138	plasma membrane	0.0150164	GO:CC	GO:0005886	56	118	5680	1.82343
Endo_arteries	139	cell death	0.0159878	GO:BP	GO:0008219	32	114	2306	1.79621
Endo_arteries	140	membrane raft	0.0171836	GO:CC	GO:0045121	10	118	339	1.76489
Endo_arteries	141	membrane microdomain	0.0171836	GO:CC	GO:0098857	10	118	339	1.76489
Endo_arteries	142	positive regulation of blood vessel endothelial cell migration	0.0178992	GO:BP	GO:0043536	6	114	79	1.74717
Endo_arteries	143	negative regulation of cellular metabolic process	0.0180053	GO:BP	GO:0031324	36	114	2785	1.7446
Endo_arteries	144	response to abiotic stimulus	0.0190946	GO:BP	GO:0009628	22	114	1264	1.71909
Endo_arteries	145	regulation of cell-substrate adhesion	0.0200909	GO:BP	GO:0010810	9	114	223	1.697
Endo_arteries	146	innervation	0.0206725	GO:BP	GO:0060384	4	114	23	1.68461
Endo_arteries	147	focal adhesion	0.0210405	GO:CC	GO:0005925	11	118	420	1.67694
Endo_arteries	148	cell-cell adhesion	0.0210794	GO:BP	GO:0098609	18	114	898	1.67614
Endo_arteries	149	biological regulation	0.0214441	GO:BP	GO:0065007	100	114	12802	1.66869
Endo_arteries	150	generation of neurons	0.0215655	GO:BP	GO:0048699	25	114	1576	1.66624
Endo_arteries	151	positive regulation of protein metabolic process	0.0218019	GO:BP	GO:0051247	25	114	1577	1.6615
Endo_arteries	152	positive regulation of cell migration	0.0227659	GO:BP	GO:0030335	14	114	568	1.64272
Endo_arteries	153	cell development	0.0232752	GO:BP	GO:0048468	30	114	2122	1.63311
Endo_arteries	154	cell-substrate junction	0.0243872	GO:CC	GO:0030055	11	118	427	1.61284
Endo_arteries	155	ameboidal-type cell migration	0.0248841	GO:BP	GO:0001667	13	114	496	1.60408
Endo_arteries	156	positive regulation of cellular protein metabolic process	0.0254015	GO:BP	GO:0032270	24	114	1488	1.59514
Endo_arteries	157	cytokine-mediated signaling pathway	0.0261473	GO:BP	GO:0019221	17	114	824	1.58257
Endo_arteries	158	positive regulation of biological process	0.0262975	GO:BP	GO:0048518	63	114	6474	1.58008
Endo_arteries	159	extracellular space	0.0276744	GO:CC	GO:0005615	40	118	3595	1.55792
Endo_arteries	160	regulation of endothelial cell chemotaxis	0.0292468	GO:BP	GO:2001026	4	114	25	1.53392
Endo_arteries	161	regulation of angiogenesis	0.029905	GO:BP	GO:0045765	11	114	361	1.52426
Endo_arteries	162	cell-matrix adhesion	0.0315465	GO:BP	GO:0007160	9	114	236	1.50105
Endo_arteries	163	extracellular region	0.0339835	GO:CC	GO:0005576	47	118	4564	1.46873
Endo_arteries	164	response to hypoxia	0.0348286	GO:BP	GO:0001666	11	114	367	1.45806
Endo_arteries	165	regulation of vasculature development	0.0348286	GO:BP	GO:1901342	11	114	367	1.45806
Endo_arteries	166	regulation of cell adhesion	0.0350519	GO:BP	GO:0030155	16	114	756	1.45529
Endo_arteries	167	positive regulation of signal transduction	0.0367355	GO:BP	GO:0009967	25	114	1626	1.43491
Endo_arteries	168	neuron differentiation	0.0401529	GO:BP	GO:0030182	23	114	1427	1.39628
Endo_arteries	169	response to wounding	0.0404056	GO:BP	GO:0009611	15	114	680	1.39356
Endo_arteries	170	regulation of epithelial cell migration	0.0405395	GO:BP	GO:0010632	10	114	306	1.39212
Endo_arteries	171	regulation of transferase activity	0.0407508	GO:BP	GO:0051338	19	114	1036	1.38986
Endo_arteries	172	negative regulation of cell adhesion	0.0428596	GO:BP	GO:0007162	10	114	308	1.36795
Endo_arteries	173	regulation of endothelial cell proliferation	0.0429338	GO:BP	GO:0001936	8	114	188	1.3672
Endo_arteries	174	sarcoplasm	0.0445724	GO:CC	GO:0016528	5	118	79	1.35093
Endo_arteries	175	cellular response to oxygen-containing compound	0.0453689	GO:BP	GO:1901701	21	114	1237	1.34324
Endo_arteries	176	positive regulation of endothelial cell migration	0.0458919	GO:BP	GO:0010595	7	114	138	1.33826
Endo_arteries	177	positive regulation of transferase activity	0.0478425	GO:BP	GO:0051347	15	114	690	1.32019
Endo_arteries	178	inositol 1,4,5-trisphosphate-sensitive calcium-release channel activity	0.0496967	GO:MF	GO:0005220	2	114	3	1.30367

## Sheet: Endo_capillaries
sub-cluster	X	term_name	p_value	source	term_id	intersection_size	query_size	term_size	neg_log_p
Endo_capillaries	1	cell periphery	1.85939e-06	GO:CC	GO:0071944	47	71	6178	5.73063
Endo_capillaries	2	plasma membrane	2.45011e-05	GO:CC	GO:0005886	43	71	5680	4.61081
Endo_capillaries	3	plasma membrane region	2.58508e-05	GO:CC	GO:0098590	19	71	1240	4.58753
Endo_capillaries	4	transport across blood-brain barrier	0.00010834	GO:BP	GO:0150104	7	71	87	3.96521
Endo_capillaries	5	vascular transport	0.000117339	GO:BP	GO:0010232	7	71	88	3.93056
Endo_capillaries	6	cell motility	0.00059851	GO:BP	GO:0048870	23	71	1840	3.22293
Endo_capillaries	7	localization of cell	0.00059851	GO:BP	GO:0051674	23	71	1840	3.22293
Endo_capillaries	8	movement of cell or subcellular component	0.000631393	GO:BP	GO:0006928	26	71	2319	3.1997
Endo_capillaries	9	carboxylic acid transmembrane transporter activity	0.00115057	GO:MF	GO:0046943	7	70	156	2.93909
Endo_capillaries	10	organic acid transmembrane transporter activity	0.00120071	GO:MF	GO:0005342	7	70	157	2.92056
Endo_capillaries	11	vascular process in circulatory system	0.0016379	GO:BP	GO:0003018	9	71	258	2.78571
Endo_capillaries	12	biological adhesion	0.00185921	GO:BP	GO:0022610	20	71	1509	2.73067
Endo_capillaries	13	cell migration	0.00194922	GO:BP	GO:0016477	21	71	1660	2.71014
Endo_capillaries	14	basal part of cell	0.0020294	GO:CC	GO:0045178	8	71	268	2.69263
Endo_capillaries	15	organic anion transmembrane transporter activity	0.0028655	GO:MF	GO:0008514	7	70	179	2.5428
Endo_capillaries	16	aromatic amino acid transmembrane transporter activity	0.00357562	GO:MF	GO:0015173	3	70	10	2.44665
Endo_capillaries	17	locomotion	0.00369015	GO:BP	GO:0040011	23	71	2039	2.43296
Endo_capillaries	18	cell adhesion	0.00756643	GO:BP	GO:0007155	19	71	1502	2.12111
Endo_capillaries	19	membrane raft	0.011019	GO:CC	GO:0045121	8	71	339	1.95786
Endo_capillaries	20	membrane microdomain	0.011019	GO:CC	GO:0098857	8	71	339	1.95786
Endo_capillaries	21	localization	0.012124	GO:BP	GO:0051179	46	71	6938	1.91635
Endo_capillaries	22	cell projection membrane	0.0127314	GO:CC	GO:0031253	8	71	346	1.89512
Endo_capillaries	23	circulatory system process	0.0129049	GO:BP	GO:0003013	12	71	632	1.88925
Endo_capillaries	24	intrinsic component of plasma membrane	0.0136661	GO:CC	GO:0031226	18	71	1725	1.86435
Endo_capillaries	25	tissue homeostasis	0.0247927	GO:BP	GO:0001894	8	71	272	1.60568
Endo_capillaries	26	integral component of plasma membrane	0.0259611	GO:CC	GO:0005887	17	71	1643	1.58568
Endo_capillaries	27	cell surface	0.0322363	GO:CC	GO:0009986	12	71	896	1.49165
Endo_capillaries	28	aromatic amino acid transport	0.0364139	GO:BP	GO:0015801	3	71	13	1.43873
Endo_capillaries	29	actin cytoskeleton	0.0369807	GO:CC	GO:0015629	9	71	517	1.43202
Endo_capillaries	30	external side of apical plasma membrane	0.0394254	GO:CC	GO:0098591	2	71	5	1.40422
Endo_capillaries	31	microvillus membrane	0.0396281	GO:CC	GO:0031528	3	71	27	1.402
Endo_capillaries	32	monocarboxylic acid transmembrane transporter activity	0.0396755	GO:MF	GO:0008028	4	70	58	1.40148
Endo_capillaries	33	external side of plasma membrane	0.0407772	GO:CC	GO:0009897	8	71	409	1.38958
Endo_capillaries	34	anatomical structure homeostasis	0.0424919	GO:BP	GO:0060249	10	71	486	1.37169

## Sheet: Endo_veins1
sub-cluster	X	term_name	p_value	source	term_id	intersection_size	query_size	term_size	neg_log_p
Endo_veins1	1	calcium ion transmembrane import into cytosol	0.00169963	GO:BP	GO:0097553	6	41	148	2.76964
Endo_veins1	2	calcium ion transport into cytosol	0.00343962	GO:BP	GO:0060402	6	41	167	2.46349
Endo_veins1	3	plasma membrane protein complex	0.00473311	GO:CC	GO:0098797	9	43	696	2.32485
Endo_veins1	4	cytosolic calcium ion transport	0.0070429	GO:BP	GO:0060401	6	41	189	2.15225
Endo_veins1	5	calcium ion transport	0.00972774	GO:BP	GO:0006816	8	41	441	2.01199
Endo_veins1	6	calcium ion transmembrane transport	0.0138384	GO:BP	GO:0070588	7	41	327	1.85891
Endo_veins1	7	calcium ion homeostasis	0.0157423	GO:BP	GO:0055074	8	41	471	1.80293
Endo_veins1	8	regulation of cytosolic calcium ion concentration	0.0253763	GO:BP	GO:0051480	7	41	359	1.59557
Endo_veins1	9	divalent inorganic cation homeostasis	0.0300747	GO:BP	GO:0072507	8	41	515	1.5218
Endo_veins1	10	metal ion transport	0.0336056	GO:BP	GO:0030001	8	41	523	1.47359
Endo_veins1	11	adenylate cyclase-activating G protein-coupled receptor signaling pathway	0.0358399	GO:BP	GO:0007189	5	41	148	1.44563

## Sheet: Endo_veins2
sub-cluster	X	term_name	p_value	source	term_id	intersection_size	query_size	term_size	neg_log_p
Endo_veins2	1	cell periphery	1.10096e-09	GO:CC	GO:0071944	86	141	6178	8.95823
Endo_veins2	2	focal adhesion	1.29361e-08	GO:CC	GO:0005925	20	141	420	7.8882
Endo_veins2	3	cell-substrate junction	1.73735e-08	GO:CC	GO:0030055	20	141	427	7.76011
Endo_veins2	4	cell migration	5.76512e-08	GO:BP	GO:0016477	40	139	1660	7.23919
Endo_veins2	5	extracellular vesicle	2.79684e-07	GO:CC	GO:1903561	44	141	2263	6.55333
Endo_veins2	6	extracellular membrane-bounded organelle	2.87624e-07	GO:CC	GO:0065010	44	141	2265	6.54118
Endo_veins2	7	extracellular organelle	2.87624e-07	GO:CC	GO:0043230	44	141	2265	6.54118
Endo_veins2	8	extracellular exosome	2.92272e-07	GO:CC	GO:0070062	43	141	2178	6.53421
Endo_veins2	9	response to stimulus	3.09999e-07	GO:BP	GO:0050896	109	139	9487	6.50864
Endo_veins2	10	localization of cell	3.43414e-07	GO:BP	GO:0051674	41	139	1840	6.46418
Endo_veins2	11	cell motility	3.43414e-07	GO:BP	GO:0048870	41	139	1840	6.46418
Endo_veins2	12	signal transduction	4.47651e-07	GO:BP	GO:0007165	86	139	6447	6.34906
Endo_veins2	13	locomotion	6.03713e-07	GO:BP	GO:0040011	43	139	2039	6.21917
Endo_veins2	14	plasma membrane	7.20776e-07	GO:CC	GO:0005886	76	141	5680	6.1422
Endo_veins2	15	cell communication	1.55163e-06	GO:BP	GO:0007154	89	139	6961	5.80921
Endo_veins2	16	movement of cell or subcellular component	2.96413e-06	GO:BP	GO:0006928	45	139	2319	5.5281
Endo_veins2	17	signaling	3.64577e-06	GO:BP	GO:0023052	88	139	6937	5.43821
Endo_veins2	18	vesicle	3.65157e-06	GO:CC	GO:0031982	60	141	4058	5.43752
Endo_veins2	19	anchoring junction	3.82893e-06	GO:CC	GO:0070161	24	141	838	5.41692
Endo_veins2	20	extracellular space	6.78271e-06	GO:CC	GO:0005615	55	141	3595	5.1686
Endo_veins2	21	extracellular matrix organization	7.08777e-06	GO:BP	GO:0030198	18	139	419	5.14949
Endo_veins2	22	cell surface receptor signaling pathway	7.28059e-06	GO:BP	GO:0007166	54	139	3226	5.13783
Endo_veins2	23	extracellular structure organization	7.35763e-06	GO:BP	GO:0043062	18	139	420	5.13326
Endo_veins2	24	external encapsulating structure organization	7.92606e-06	GO:BP	GO:0045229	18	139	422	5.10094
Endo_veins2	25	extracellular region	1.85615e-05	GO:CC	GO:0005576	63	141	4564	4.73139
Endo_veins2	26	anatomical structure development	2.03702e-05	GO:BP	GO:0048856	80	139	6164	4.69101
Endo_veins2	27	developmental process	2.5465e-05	GO:BP	GO:0032502	84	139	6678	4.59406
Endo_veins2	28	positive regulation of cell migration	2.64137e-05	GO:BP	GO:0030335	20	139	568	4.57817
Endo_veins2	29	response to oxygen levels	3.36406e-05	GO:BP	GO:0070482	17	139	410	4.47314
Endo_veins2	30	regulation of apoptotic process	3.39324e-05	GO:BP	GO:0042981	34	139	1560	4.46939
Endo_veins2	31	system development	4.48156e-05	GO:BP	GO:0048731	70	139	5095	4.34857
Endo_veins2	32	multicellular organism development	4.55205e-05	GO:BP	GO:0007275	75	139	5670	4.34179
Endo_veins2	33	cell-substrate adhesion	4.72893e-05	GO:BP	GO:0031589	16	139	368	4.32524
Endo_veins2	34	anatomical structure morphogenesis	4.86731e-05	GO:BP	GO:0009653	48	139	2816	4.31271
Endo_veins2	35	enzyme binding	4.97423e-05	GO:MF	GO:0019899	39	145	2048	4.30327
Endo_veins2	36	positive regulation of cell motility	5.25459e-05	GO:BP	GO:2000147	20	139	592	4.27946
Endo_veins2	37	regulation of programmed cell death	6.6444e-05	GO:BP	GO:0043067	34	139	1603	4.17754
Endo_veins2	38	cytoplasmic vesicle	7.44315e-05	GO:CC	GO:0031410	41	141	2433	4.12824
Endo_veins2	39	positive regulation of cellular component movement	7.51759e-05	GO:BP	GO:0051272	20	139	605	4.12392
Endo_veins2	40	supramolecular fiber organization	7.74759e-05	GO:BP	GO:0097435	24	139	863	4.11083
Endo_veins2	41	intracellular vesicle	7.86981e-05	GO:CC	GO:0097708	41	141	2438	4.10404
Endo_veins2	42	positive regulation of locomotion	7.9366e-05	GO:BP	GO:0040017	20	139	607	4.10037
Endo_veins2	43	response to decreased oxygen levels	7.94657e-05	GO:BP	GO:0036293	16	139	382	4.09982
Endo_veins2	44	regulation of cellular component movement	8.12776e-05	GO:BP	GO:0051270	28	139	1149	4.09003
Endo_veins2	45	response to organic substance	8.65763e-05	GO:BP	GO:0010033	54	139	3457	4.0626
Endo_veins2	46	regulation of cell migration	8.79007e-05	GO:BP	GO:0030334	26	139	1008	4.05601
Endo_veins2	47	multicellular organismal process	9.46148e-05	GO:BP	GO:0032501	93	139	8000	4.02404
Endo_veins2	48	cellular response to stimulus	9.78599e-05	GO:BP	GO:0051716	92	139	7873	4.0094
Endo_veins2	49	animal organ development	0.00012877	GO:BP	GO:0048513	56	139	3701	3.89018
Endo_veins2	50	apoptotic process	0.000151352	GO:BP	GO:0006915	38	139	1998	3.82001
Endo_veins2	51	regulation of locomotion	0.000162945	GO:BP	GO:0040012	27	139	1113	3.78796
Endo_veins2	52	cell adhesion	0.000168927	GO:BP	GO:0007155	32	139	1502	3.7723
Endo_veins2	53	biological adhesion	0.000188032	GO:BP	GO:0022610	32	139	1509	3.72577
Endo_veins2	54	actin cytoskeleton organization	0.000230111	GO:BP	GO:0030036	21	139	712	3.63806
Endo_veins2	55	regulation of response to stimulus	0.000267615	GO:BP	GO:0048583	62	139	4416	3.57249
Endo_veins2	56	regulation of cell motility	0.000286153	GO:BP	GO:2000145	26	139	1070	3.5434
Endo_veins2	57	response to hypoxia	0.000297872	GO:BP	GO:0001666	15	139	367	3.52597
Endo_veins2	58	regulation of cell-substrate adhesion	0.00030249	GO:BP	GO:0010810	12	139	223	3.51929
Endo_veins2	59	external encapsulating structure	0.000304083	GO:CC	GO:0030312	17	141	563	3.51701
Endo_veins2	60	extrinsic apoptotic signaling pathway	0.00034966	GO:BP	GO:0097191	12	139	226	3.45635
Endo_veins2	61	programmed cell death	0.000374752	GO:BP	GO:0012501	39	139	2158	3.42626
Endo_veins2	62	cellular developmental process	0.000418441	GO:BP	GO:0048869	62	139	4468	3.37837
Endo_veins2	63	cellular response to organic substance	0.000422006	GO:BP	GO:0071310	46	139	2821	3.37468
Endo_veins2	64	actin filament-based process	0.000462264	GO:BP	GO:0030029	22	139	810	3.33511
Endo_veins2	65	regulation of cell death	0.000479771	GO:BP	GO:0010941	34	139	1740	3.31897
Endo_veins2	66	wound healing	0.000509341	GO:BP	GO:0042060	18	139	555	3.29299
Endo_veins2	67	cellular response to chemical stimulus	0.000550662	GO:BP	GO:0070887	52	139	3443	3.25911
Endo_veins2	68	cell death	0.000736442	GO:BP	GO:0008219	40	139	2306	3.13286
Endo_veins2	69	response to stress	0.000761046	GO:BP	GO:0006950	60	139	4321	3.11859
Endo_veins2	70	regulation of extrinsic apoptotic signaling pathway	0.000821667	GO:BP	GO:2001236	10	139	159	3.0853
Endo_veins2	71	membrane	0.000846176	GO:CC	GO:0016020	100	141	9829	3.07254
Endo_veins2	72	circulatory system development	0.000940064	GO:BP	GO:0072359	27	139	1215	3.02684
Endo_veins2	73	cell leading edge	0.00110986	GO:CC	GO:0031252	14	141	426	2.95473
Endo_veins2	74	regulation of cell communication	0.00124012	GO:BP	GO:0010646	53	139	3634	2.90654
Endo_veins2	75	endomembrane system	0.00132183	GO:CC	GO:0012505	59	141	4651	2.87882
Endo_veins2	76	cell differentiation	0.00137287	GO:BP	GO:0030154	60	139	4392	2.86237
Endo_veins2	77	extracellular matrix	0.00137453	GO:CC	GO:0031012	16	141	562	2.86184
Endo_veins2	78	response to cytokine	0.00144434	GO:BP	GO:0034097	27	139	1242	2.84033
Endo_veins2	79	regulation of signal transduction	0.00158843	GO:BP	GO:0009966	49	139	3251	2.79903
Endo_veins2	80	regulation of signaling	0.00169191	GO:BP	GO:0023051	53	139	3669	2.77162
Endo_veins2	81	regulation of cell morphogenesis	0.00169783	GO:BP	GO:0022604	13	139	312	2.77011
Endo_veins2	82	cell cortex	0.00182326	GO:CC	GO:0005938	12	141	326	2.73915
Endo_veins2	83	cytoplasmic vesicle membrane	0.00189693	GO:CC	GO:0030659	19	141	789	2.72195
Endo_veins2	84	protein folding in endoplasmic reticulum	0.00209777	GO:BP	GO:0034975	4	139	11	2.67824
Endo_veins2	85	response to wounding	0.00221128	GO:BP	GO:0009611	19	139	680	2.65536
Endo_veins2	86	actin cytoskeleton	0.00222274	GO:CC	GO:0015629	15	141	517	2.65311
Endo_veins2	87	cytoplasm	0.0023503	GO:CC	GO:0005737	113	141	11951	2.62888
Endo_veins2	88	ruffle	0.00249279	GO:CC	GO:0001726	9	141	180	2.60331
Endo_veins2	89	ubiquitin protein ligase binding	0.00258641	GO:MF	GO:0031625	12	145	298	2.5873
Endo_veins2	90	positive regulation of cellular process	0.0030084	GO:BP	GO:0048522	72	139	5863	2.52166
Endo_veins2	91	cell-substrate junction organization	0.00336691	GO:BP	GO:0150115	8	139	107	2.47277
Endo_veins2	92	cell adhesion molecule binding	0.00361111	GO:MF	GO:0050839	16	145	544	2.44236
Endo_veins2	93	substrate adhesion-dependent cell spreading	0.00387418	GO:BP	GO:0034446	8	139	109	2.41182
Endo_veins2	94	leukocyte migration	0.00392517	GO:BP	GO:0050900	16	139	511	2.40614
Endo_veins2	95	ubiquitin-like protein ligase binding	0.00470246	GO:MF	GO:0044389	12	145	316	2.32768
Endo_veins2	96	fibroblast migration	0.0055653	GO:BP	GO:0010761	6	139	52	2.25451
Endo_veins2	97	vesicle membrane	0.00621922	GO:CC	GO:0012506	23	141	1183	2.20626
Endo_veins2	98	endoplasmic reticulum	0.00627044	GO:CC	GO:0005783	32	141	1995	2.2027
Endo_veins2	99	cellular response to external stimulus	0.00666824	GO:BP	GO:0071496	13	139	353	2.17599
Endo_veins2	100	response to abiotic stimulus	0.00668443	GO:BP	GO:0009628	26	139	1264	2.17494
Endo_veins2	101	regulation of localization	0.00682442	GO:BP	GO:0032879	44	139	2906	2.16593
Endo_veins2	102	response to chemical	0.0072465	GO:BP	GO:0042221	62	139	4829	2.13987
Endo_veins2	103	response to external stimulus	0.00727663	GO:BP	GO:0009605	46	139	3114	2.13807
Endo_veins2	104	cell junction	0.00733779	GO:CC	GO:0030054	33	141	2107	2.13443
Endo_veins2	105	actin filament bundle	0.00765977	GO:CC	GO:0032432	6	141	78	2.11578
Endo_veins2	106	immune system process	0.00837295	GO:BP	GO:0002376	49	139	3438	2.07712
Endo_veins2	107	actin filament bundle assembly	0.00842914	GO:BP	GO:0051017	9	139	161	2.07422
Endo_veins2	108	apoptotic signaling pathway	0.00864319	GO:BP	GO:0097190	17	139	609	2.06333
Endo_veins2	109	membrane to membrane docking	0.0087322	GO:BP	GO:0022614	3	139	5	2.05888
Endo_veins2	110	actin filament	0.0087453	GO:CC	GO:0005884	7	141	118	2.05823
Endo_veins2	111	positive regulation of apoptotic process	0.00902751	GO:BP	GO:0043065	17	139	611	2.04443
Endo_veins2	112	cluster of actin-based cell projections	0.00960562	GO:CC	GO:0098862	8	141	164	2.01747
Endo_veins2	113	actin filament bundle organization	0.00980328	GO:BP	GO:0061572	9	139	164	2.00863
Endo_veins2	114	regulation of cell adhesion	0.010394	GO:BP	GO:0030155	19	139	756	1.98322
Endo_veins2	115	regulation of substrate adhesion-dependent cell spreading	0.010655	GO:BP	GO:1900024	6	139	58	1.97244
Endo_veins2	116	actin-based cell projection	0.0110163	GO:CC	GO:0098858	9	141	217	1.95796
Endo_veins2	117	regulation of biological quality	0.0115531	GO:BP	GO:0065008	55	139	4116	1.9373
Endo_veins2	118	regulation of extrinsic apoptotic signaling pathway via death domain receptors	0.011787	GO:BP	GO:1902041	6	139	59	1.9286
Endo_veins2	119	cellular response to cytokine stimulus	0.0128959	GO:BP	GO:0071345	24	139	1148	1.88955
Endo_veins2	120	positive regulation of programmed cell death	0.0129697	GO:BP	GO:0043068	17	139	628	1.88707
Endo_veins2	121	response to metal ion	0.0136077	GO:BP	GO:0010038	13	139	377	1.86622
Endo_veins2	122	response to oxygen-containing compound	0.0141364	GO:BP	GO:1901700	31	139	1748	1.84966
Endo_veins2	123	negative regulation of cellular process	0.0143595	GO:BP	GO:0048523	64	139	5153	1.84286
Endo_veins2	124	endoplasmic reticulum protein-containing complex	0.0147425	GO:CC	GO:0140534	7	141	128	1.83143
Endo_veins2	125	cell development	0.0156436	GO:BP	GO:0048468	35	139	2122	1.80566
Endo_veins2	126	protein-containing complex binding	0.0158061	GO:MF	GO:0044877	25	145	1304	1.80117
Endo_veins2	127	actin filament organization	0.0169188	GO:BP	GO:0007015	14	139	445	1.77163
Endo_veins2	128	cell activation	0.0183639	GO:BP	GO:0001775	28	139	1507	1.73603
Endo_veins2	129	cellular response to extracellular stimulus	0.0206957	GO:BP	GO:0031668	11	139	279	1.68412
Endo_veins2	130	response to inorganic substance	0.0208681	GO:BP	GO:0010035	16	139	583	1.68052
Endo_veins2	131	collagen-containing extracellular matrix	0.0225667	GO:CC	GO:0062023	12	141	421	1.64653
Endo_veins2	132	cell-substrate junction assembly	0.0253205	GO:BP	GO:0007044	7	139	101	1.59653
Endo_veins2	133	cell-matrix adhesion	0.0284788	GO:BP	GO:0007160	10	139	236	1.54548
Endo_veins2	134	ruffle membrane	0.0294122	GO:CC	GO:0032587	6	141	99	1.53147
Endo_veins2	135	negative regulation of extrinsic apoptotic signaling pathway via death domain receptors	0.0296405	GO:BP	GO:1902042	5	139	41	1.52811
Endo_veins2	136	actin filament binding	0.0303754	GO:MF	GO:0051015	9	145	213	1.51748
Endo_veins2	137	uropod	0.0332198	GO:CC	GO:0001931	3	141	13	1.4786
Endo_veins2	138	cell trailing edge	0.0332198	GO:CC	GO:0031254	3	141	13	1.4786
Endo_veins2	139	actin binding	0.0339849	GO:MF	GO:0003779	13	145	449	1.46871
Endo_veins2	140	intracellular signal transduction	0.0340817	GO:BP	GO:0035556	42	139	2886	1.46748
Endo_veins2	141	prostaglandin transmembrane transporter activity	0.0415608	GO:MF	GO:0015132	2	145	2	1.38132
Endo_veins2	142	extracellular matrix structural constituent	0.0433712	GO:MF	GO:0005201	8	145	173	1.3628
Endo_veins2	143	regulation of cellular process	0.0434462	GO:BP	GO:0050794	111	139	11517	1.36205
Endo_veins2	144	positive regulation of cell death	0.0446424	GO:BP	GO:0010942	17	139	691	1.35025
Endo_veins2	145	regulation of developmental process	0.0463849	GO:BP	GO:0050793	39	139	2621	1.33362
Endo_veins2	146	cellular response to nutrient levels	0.0467923	GO:BP	GO:0031669	10	139	250	1.32983
Endo_veins2	147	SREBP-SCAP-Insig complex	0.0499609	GO:CC	GO:0032937	2	141	3	1.30137
Endo_veins2	148	regulation of apoptotic signaling pathway	0.0499799	GO:BP	GO:2001233	12	139	365	1.3012
