# Supplementary material for: Single-nucleus RNA sequencing of midbrain blood-brain barrier cells in schizophrenia reveals subtle transcriptional changes with overall preservation of cellular proportions and phenotypes
Source: Mol Psychiatry. 2022 Oct 3;27(11):4731–40. doi: 10.1038/s41380-022-01796-0 (PMC9734060; doi:10.1038/s41380-022-01796-0)
Supplement: Supplementary file 9 — Supplementary Table 9 [file 41380_2022_1796_MOESM9_ESM.xlsx]

## Sheet: Ast_fibrous2
sub-cluster	X	term_name	p_value	source	term_id	intersection_size	query_size	term_size	neg_log_p
Ast_fibrous2	1	plasma membrane bounded cell projection	2.16531e-09	GO:CC	GO:0120025	63	218	2234	8.66448
Ast_fibrous2	2	cell projection	4.99339e-09	GO:CC	GO:0042995	64	218	2337	8.3016
Ast_fibrous2	3	cell junction	1.5677e-07	GO:CC	GO:0030054	57	218	2107	6.80474
Ast_fibrous2	4	regulation of localization	3.10615e-06	GO:BP	GO:0032879	69	211	2906	5.50778
Ast_fibrous2	5	neuron to neuron synapse	4.42851e-06	GO:CC	GO:0098984	20	218	371	5.35374
Ast_fibrous2	6	cytoskeleton	7.40357e-06	GO:CC	GO:0005856	57	218	2339	5.13056
Ast_fibrous2	7	cell projection organization	2.90979e-05	GO:BP	GO:0030030	46	211	1636	4.53614
Ast_fibrous2	8	plasma membrane bounded cell projection organization	4.00626e-05	GO:BP	GO:0120036	45	211	1596	4.39726
Ast_fibrous2	9	cytoskeletal protein binding	4.95614e-05	GO:MF	GO:0008092	32	213	1001	4.30486
Ast_fibrous2	10	cell periphery	5.08292e-05	GO:CC	GO:0071944	108	218	6178	4.29389
Ast_fibrous2	11	cytoskeleton organization	9.73457e-05	GO:BP	GO:0007010	42	211	1473	4.01168
Ast_fibrous2	12	cell development	9.76136e-05	GO:BP	GO:0048468	53	211	2122	4.01049
Ast_fibrous2	13	plasma membrane bounded cell projection cytoplasm	0.00013435	GO:CC	GO:0032838	14	218	225	3.87176
Ast_fibrous2	14	postsynaptic density	0.000160749	GO:CC	GO:0014069	17	218	339	3.79385
Ast_fibrous2	15	neuron projection	0.000166064	GO:CC	GO:0043005	38	218	1384	3.77972
Ast_fibrous2	16	asymmetric synapse	0.000205337	GO:CC	GO:0032279	17	218	345	3.68753
Ast_fibrous2	17	movement of cell or subcellular component	0.000288809	GO:BP	GO:0006928	55	211	2319	3.53939
Ast_fibrous2	18	muscle system process	0.000339134	GO:BP	GO:0003012	21	211	471	3.46963
Ast_fibrous2	19	postsynaptic specialization	0.000414655	GO:CC	GO:0099572	17	218	363	3.38231
Ast_fibrous2	20	identical protein binding	0.000424142	GO:MF	GO:0042802	48	213	2063	3.37249
Ast_fibrous2	21	nervous system development	0.000485413	GO:BP	GO:0007399	57	211	2484	3.31389
Ast_fibrous2	22	supramolecular fiber	0.000512359	GO:CC	GO:0099512	30	218	997	3.29043
Ast_fibrous2	23	supramolecular polymer	0.000603206	GO:CC	GO:0099081	30	218	1005	3.21953
Ast_fibrous2	24	synapse	0.000669868	GO:CC	GO:0045202	36	218	1348	3.17401
Ast_fibrous2	25	plasma membrane region	0.000760323	GO:CC	GO:0098590	34	218	1240	3.119
Ast_fibrous2	26	actin cytoskeleton	0.000897664	GO:CC	GO:0015629	20	218	517	3.04689
Ast_fibrous2	27	Z disc	0.000928066	GO:CC	GO:0030018	10	218	129	3.03242
Ast_fibrous2	28	regulation of transport	0.00093536	GO:BP	GO:0051049	46	211	1839	3.02902
Ast_fibrous2	29	system development	0.00100787	GO:BP	GO:0048731	93	211	5095	2.99659
Ast_fibrous2	30	cytoplasm	0.00103546	GO:CC	GO:0005737	169	218	11951	2.98487
Ast_fibrous2	31	axoneme	0.001067	GO:CC	GO:0005930	10	218	131	2.97184
Ast_fibrous2	32	cytoplasmic region	0.00117486	GO:CC	GO:0099568	14	218	270	2.93001
Ast_fibrous2	33	neuron development	0.00122175	GO:BP	GO:0048666	34	211	1159	2.91302
Ast_fibrous2	34	ciliary plasm	0.00122367	GO:CC	GO:0097014	10	218	133	2.91234
Ast_fibrous2	35	myofibril	0.00125501	GO:CC	GO:0030016	13	218	234	2.90135
Ast_fibrous2	36	glutamatergic synapse	0.00136772	GO:CC	GO:0098978	16	218	354	2.864
Ast_fibrous2	37	cellular developmental process	0.00161855	GO:BP	GO:0048869	84	211	4468	2.79087
Ast_fibrous2	38	contractile fiber	0.00181309	GO:CC	GO:0043292	13	218	242	2.74158
Ast_fibrous2	39	cell adhesion molecule binding	0.00181685	GO:MF	GO:0050839	20	213	544	2.74068
Ast_fibrous2	40	dendrite	0.00192327	GO:CC	GO:0030425	22	218	641	2.71596
Ast_fibrous2	41	dendritic tree	0.00202082	GO:CC	GO:0097447	22	218	643	2.69447
Ast_fibrous2	42	I band	0.0020675	GO:CC	GO:0031674	10	218	141	2.68455
Ast_fibrous2	43	sarcomere	0.00237163	GO:CC	GO:0030017	12	218	211	2.62495
Ast_fibrous2	44	muscle contraction	0.00278856	GO:BP	GO:0006936	17	211	363	2.55462
Ast_fibrous2	45	cell differentiation	0.00327644	GO:BP	GO:0030154	82	211	4392	2.4846
Ast_fibrous2	46	system process	0.00337338	GO:BP	GO:0003008	52	211	2306	2.47194
Ast_fibrous2	47	regulation of biological quality	0.0039107	GO:BP	GO:0065008	78	211	4116	2.40775
Ast_fibrous2	48	dendritic spine	0.00401649	GO:CC	GO:0043197	11	218	186	2.39615
Ast_fibrous2	49	protein homodimerization activity	0.00444845	GO:MF	GO:0042803	22	213	679	2.35179
Ast_fibrous2	50	neuron spine	0.00467055	GO:CC	GO:0044309	11	218	189	2.33063
Ast_fibrous2	51	localization	0.00483996	GO:BP	GO:0051179	114	211	6938	2.31516
Ast_fibrous2	52	external side of apical plasma membrane	0.00557993	GO:CC	GO:0098591	3	218	5	2.25337
Ast_fibrous2	53	postsynapse	0.00640898	GO:CC	GO:0098794	21	218	641	2.19321
Ast_fibrous2	54	cell body	0.00712084	GO:CC	GO:0044297	20	218	595	2.14747
Ast_fibrous2	55	excitatory synapse	0.00755331	GO:CC	GO:0060076	6	218	49	2.12186
Ast_fibrous2	56	calmodulin binding	0.00903997	GO:MF	GO:0005516	11	213	203	2.04383
Ast_fibrous2	57	somatodendritic compartment	0.0100243	GO:CC	GO:0036477	25	218	875	1.99895
Ast_fibrous2	58	motile cilium	0.0104188	GO:CC	GO:0031514	11	218	206	1.98218
Ast_fibrous2	59	circulatory system process	0.0105787	GO:BP	GO:0003013	22	211	632	1.97557
Ast_fibrous2	60	neurogenesis	0.0110514	GO:BP	GO:0022008	41	211	1698	1.95658
Ast_fibrous2	61	extracellular exosome	0.0114426	GO:CC	GO:0070062	46	218	2178	1.94148
Ast_fibrous2	62	actin filament bundle	0.0120692	GO:CC	GO:0032432	7	218	78	1.91832
Ast_fibrous2	63	positive regulation of transport	0.01281	GO:BP	GO:0051050	28	211	951	1.89245
Ast_fibrous2	64	anatomical structure morphogenesis	0.0128261	GO:BP	GO:0009653	58	211	2816	1.89191
Ast_fibrous2	65	cellular component organization	0.013849	GO:BP	GO:0016043	109	211	6661	1.85858
Ast_fibrous2	66	multicellular organismal process	0.0144206	GO:BP	GO:0032501	125	211	8000	1.84102
Ast_fibrous2	67	synaptic membrane	0.01529	GO:CC	GO:0097060	15	218	384	1.81559
Ast_fibrous2	68	developmental process	0.0158094	GO:BP	GO:0032502	109	211	6678	1.80108
Ast_fibrous2	69	neuron projection development	0.0171283	GO:BP	GO:0031175	29	211	1021	1.76629
Ast_fibrous2	70	neuron differentiation	0.0178513	GO:BP	GO:0030182	36	211	1427	1.74833
Ast_fibrous2	71	anatomical structure development	0.023646	GO:BP	GO:0048856	102	211	6164	1.62624
Ast_fibrous2	72	plasma membrane bounded cell projection assembly	0.0241159	GO:BP	GO:0120031	21	211	616	1.6177
Ast_fibrous2	73	actin binding	0.0245556	GO:MF	GO:0003779	16	213	449	1.60985
Ast_fibrous2	74	biological adhesion	0.0248276	GO:BP	GO:0022610	37	211	1509	1.60506
Ast_fibrous2	75	protein binding	0.026506	GO:MF	GO:0005515	190	213	14767	1.57666
Ast_fibrous2	76	cell morphogenesis	0.026584	GO:BP	GO:0000902	29	211	1045	1.57538
Ast_fibrous2	77	generation of neurons	0.0270964	GO:BP	GO:0048699	38	211	1576	1.56709
Ast_fibrous2	78	positive regulation of cellular process	0.027194	GO:BP	GO:0048522	98	211	5863	1.56553
Ast_fibrous2	79	polypeptide N-acetylgalactosaminyltransferase activity	0.0280521	GO:MF	GO:0004653	4	213	20	1.55203
Ast_fibrous2	80	microvillus	0.0282929	GO:CC	GO:0005902	7	218	89	1.54832
Ast_fibrous2	81	extracellular vesicle	0.0292684	GO:CC	GO:1903561	46	218	2263	1.5336
Ast_fibrous2	82	extracellular membrane-bounded organelle	0.0298968	GO:CC	GO:0065010	46	218	2265	1.52437
Ast_fibrous2	83	extracellular organelle	0.0298968	GO:CC	GO:0043230	46	218	2265	1.52437
Ast_fibrous2	84	cell projection assembly	0.0337677	GO:BP	GO:0030031	21	211	630	1.4715
Ast_fibrous2	85	plasma membrane bounded cell projection morphogenesis	0.0364466	GO:BP	GO:0120039	22	211	684	1.43834
Ast_fibrous2	86	protein dimerization activity	0.0383426	GO:MF	GO:0046983	27	213	1073	1.41632
Ast_fibrous2	87	multicellular organism development	0.0384646	GO:BP	GO:0007275	95	211	5670	1.41494
Ast_fibrous2	88	anchoring junction	0.0392225	GO:CC	GO:0070161	23	218	838	1.40647
Ast_fibrous2	89	cell projection morphogenesis	0.0398561	GO:BP	GO:0048858	22	211	688	1.3995
Ast_fibrous2	90	cilium	0.0402566	GO:CC	GO:0005929	20	218	674	1.39516
Ast_fibrous2	91	cellular component morphogenesis	0.0436154	GO:BP	GO:0032989	24	211	797	1.36036
Ast_fibrous2	92	positive regulation of cell projection organization	0.0462744	GO:BP	GO:0031346	15	211	359	1.33466

## Sheet: Ast_fibrous1
sub-cluster	X	term_name	p_value	source	term_id	intersection_size	query_size	term_size	neg_log_p
Ast_fibrous1	1	extracellular matrix organization	0.000165158	GO:BP	GO:0030198	10	46	419	3.7821
Ast_fibrous1	2	extracellular structure organization	0.000168876	GO:BP	GO:0043062	10	46	420	3.77243
Ast_fibrous1	3	external encapsulating structure organization	0.000176535	GO:BP	GO:0045229	10	46	422	3.75317
Ast_fibrous1	4	cell periphery	0.00251114	GO:CC	GO:0071944	30	47	6178	2.60013
Ast_fibrous1	5	extracellular matrix	0.0149365	GO:CC	GO:0031012	8	47	562	1.82575
Ast_fibrous1	6	external encapsulating structure	0.0151237	GO:CC	GO:0030312	8	47	563	1.82034
Ast_fibrous1	7	collagen-containing extracellular matrix	0.0171771	GO:CC	GO:0062023	7	47	421	1.76505
Ast_fibrous1	8	alpha-actinin binding	0.0212723	GO:MF	GO:0051393	3	47	28	1.67219

## Sheet: Ast_immune1
sub-cluster	X	term_name	p_value	source	term_id	intersection_size	query_size	term_size	neg_log_p
Ast_immune1	1	response to cytokine	1.93639e-13	GO:BP	GO:0034097	56	235	1242	12.713
Ast_immune1	2	cellular response to cytokine stimulus	5.83438e-13	GO:BP	GO:0071345	53	235	1148	12.234
Ast_immune1	3	cellular response to organic substance	1.32137e-12	GO:BP	GO:0071310	87	235	2821	11.879
Ast_immune1	4	cellular response to chemical stimulus	1.28545e-11	GO:BP	GO:0070887	96	235	3443	10.8909
Ast_immune1	5	response to organic substance	5.00432e-11	GO:BP	GO:0010033	95	235	3457	10.3007
Ast_immune1	6	signaling	7.22748e-11	GO:BP	GO:0023052	147	235	6937	10.141
Ast_immune1	7	cellular response to stimulus	7.26432e-10	GO:BP	GO:0051716	157	235	7873	9.1388
Ast_immune1	8	vasculature development	1.46206e-09	GO:BP	GO:0001944	40	235	834	8.83504
Ast_immune1	9	blood vessel development	1.5882e-09	GO:BP	GO:0001568	39	235	797	8.7991
Ast_immune1	10	response to stimulus	1.72117e-09	GO:BP	GO:0050896	176	235	9487	8.76418
Ast_immune1	11	cell communication	1.89347e-09	GO:BP	GO:0007154	144	235	6961	8.72274
Ast_immune1	12	response to chemical	7.67138e-09	GO:BP	GO:0042221	112	235	4829	8.11513
Ast_immune1	13	anatomical structure morphogenesis	9.16147e-09	GO:BP	GO:0009653	79	235	2816	8.03803
Ast_immune1	14	circulatory system development	2.32526e-08	GO:BP	GO:0072359	47	235	1215	7.63353
Ast_immune1	15	blood vessel morphogenesis	2.75999e-08	GO:BP	GO:0048514	35	235	715	7.55909
Ast_immune1	16	cell periphery	4.20407e-08	GO:CC	GO:0071944	125	238	6178	7.37633
Ast_immune1	17	signal transduction	7.17511e-08	GO:BP	GO:0007165	133	235	6447	7.14417
Ast_immune1	18	cell surface receptor signaling pathway	7.40036e-08	GO:BP	GO:0007166	84	235	3226	7.13075
Ast_immune1	19	cell junction	7.75911e-08	GO:CC	GO:0030054	61	238	2107	7.11019
Ast_immune1	20	regulation of multicellular organismal process	9.17224e-08	GO:BP	GO:0051239	78	235	2888	7.03752
Ast_immune1	21	tube development	2.15595e-07	GO:BP	GO:0035295	44	235	1158	6.66636
Ast_immune1	22	movement of cell or subcellular component	6.19885e-07	GO:BP	GO:0006928	66	235	2319	6.20769
Ast_immune1	23	cytokine-mediated signaling pathway	1.31422e-06	GO:BP	GO:0019221	35	235	824	5.88133
Ast_immune1	24	tube morphogenesis	1.43538e-06	GO:BP	GO:0035239	38	235	956	5.84303
Ast_immune1	25	response to stress	2.03453e-06	GO:BP	GO:0006950	98	235	4321	5.69154
Ast_immune1	26	regulation of localization	2.21442e-06	GO:BP	GO:0032879	75	235	2906	5.65474
Ast_immune1	27	positive regulation of multicellular organismal process	2.61959e-06	GO:BP	GO:0051240	49	235	1497	5.58177
Ast_immune1	28	regulation of response to stimulus	3.01221e-06	GO:BP	GO:0048583	99	235	4416	5.52112
Ast_immune1	29	interferon-gamma-mediated signaling pathway	3.33968e-06	GO:BP	GO:0060333	12	235	88	5.4763
Ast_immune1	30	response to external stimulus	3.53439e-06	GO:BP	GO:0009605	78	235	3114	5.45169
Ast_immune1	31	multicellular organismal process	4.04139e-06	GO:BP	GO:0032501	149	235	8000	5.39347
Ast_immune1	32	angiogenesis	5.52312e-06	GO:BP	GO:0001525	29	235	621	5.25782
Ast_immune1	33	cellular developmental process	5.85216e-06	GO:BP	GO:0048869	99	235	4468	5.23268
Ast_immune1	34	regulation of developmental process	6.14893e-06	GO:BP	GO:0050793	69	235	2621	5.2112
Ast_immune1	35	regulation of signaling	9.02801e-06	GO:BP	GO:0023051	86	235	3669	5.04441
Ast_immune1	36	anatomical structure formation involved in morphogenesis	9.14179e-06	GO:BP	GO:0048646	42	235	1209	5.03897
Ast_immune1	37	cell migration	9.69229e-06	GO:BP	GO:0016477	51	235	1660	5.01357
Ast_immune1	38	multicellular organism development	1.09185e-05	GO:BP	GO:0007275	116	235	5670	4.96184
Ast_immune1	39	cell differentiation	1.16419e-05	GO:BP	GO:0030154	97	235	4392	4.93398
Ast_immune1	40	developmental process	1.20982e-05	GO:BP	GO:0032502	130	235	6678	4.91728
Ast_immune1	41	regulation of cell communication	1.31066e-05	GO:BP	GO:0010646	85	235	3634	4.88251
Ast_immune1	42	system development	1.80824e-05	GO:BP	GO:0048731	107	235	5095	4.74274
Ast_immune1	43	regulation of cellular component movement	2.15501e-05	GO:BP	GO:0051270	40	235	1149	4.66655
Ast_immune1	44	anatomical structure development	2.37444e-05	GO:BP	GO:0048856	122	235	6164	4.62444
Ast_immune1	45	identical protein binding	2.6109e-05	GO:MF	GO:0042802	55	237	2063	4.58321
Ast_immune1	46	collagen-containing extracellular matrix	2.79793e-05	GO:CC	GO:0062023	21	238	421	4.55316
Ast_immune1	47	locomotion	2.94252e-05	GO:BP	GO:0040011	57	235	2039	4.53128
Ast_immune1	48	cell motility	4.08049e-05	GO:BP	GO:0048870	53	235	1840	4.38929
Ast_immune1	49	localization of cell	4.08049e-05	GO:BP	GO:0051674	53	235	1840	4.38929
Ast_immune1	50	plasma membrane	5.01162e-05	GO:CC	GO:0005886	109	238	5680	4.30002
Ast_immune1	51	positive regulation of cytokine production	8.03427e-05	GO:BP	GO:0001819	24	235	498	4.09505
Ast_immune1	52	growth	9.30261e-05	GO:BP	GO:0040007	35	235	973	4.0314
Ast_immune1	53	cytokine binding	9.64421e-05	GO:MF	GO:0019955	12	237	140	4.01573
Ast_immune1	54	regulation of signal transduction	0.000136546	GO:BP	GO:0009966	76	235	3251	3.86472
Ast_immune1	55	immune system process	0.000138137	GO:BP	GO:0002376	79	235	3438	3.85969
Ast_immune1	56	calmodulin binding	0.000140748	GO:MF	GO:0005516	14	237	203	3.85156
Ast_immune1	57	cytokine production	0.000150147	GO:BP	GO:0001816	32	235	854	3.82348
Ast_immune1	58	protein binding	0.000164768	GO:MF	GO:0005515	216	237	14767	3.78313
Ast_immune1	59	regulation of anatomical structure morphogenesis	0.000184566	GO:BP	GO:0022603	36	235	1048	3.73385
Ast_immune1	60	neuron projection	0.000187793	GO:CC	GO:0043005	40	238	1384	3.72632
Ast_immune1	61	extracellular matrix	0.000226154	GO:CC	GO:0031012	23	238	562	3.6456
Ast_immune1	62	external encapsulating structure	0.000233186	GO:CC	GO:0030312	23	238	563	3.6323
Ast_immune1	63	protein homodimerization activity	0.000236225	GO:MF	GO:0042803	26	237	679	3.62667
Ast_immune1	64	synapse	0.000259171	GO:CC	GO:0045202	39	238	1348	3.58641
Ast_immune1	65	positive regulation of biological process	0.000270576	GO:BP	GO:0048518	123	235	6474	3.56771
Ast_immune1	66	defense response	0.000307399	GO:BP	GO:0006952	53	235	1956	3.5123
Ast_immune1	67	regulation of cytokine production	0.000414031	GO:BP	GO:0001817	31	235	847	3.38297
Ast_immune1	68	biological process involved in interspecies interaction between organisms	0.00052678	GO:BP	GO:0044419	49	235	1768	3.27837
Ast_immune1	69	connective tissue development	0.000529662	GO:BP	GO:0061448	16	235	255	3.276
Ast_immune1	70	response to wounding	0.000565205	GO:BP	GO:0009611	27	235	680	3.24779
Ast_immune1	71	regulation of cell migration	0.000678402	GO:BP	GO:0030334	34	235	1008	3.16851
Ast_immune1	72	positive regulation of gene expression	0.000699351	GO:BP	GO:0010628	38	235	1206	3.1553
Ast_immune1	73	positive regulation of cellular component movement	0.000778461	GO:BP	GO:0051272	25	235	605	3.10876
Ast_immune1	74	positive regulation of cell migration	0.000909881	GO:BP	GO:0030335	24	235	568	3.04102
Ast_immune1	75	regulation of cell motility	0.000918237	GO:BP	GO:2000145	35	235	1070	3.03705
Ast_immune1	76	protein dimerization activity	0.0009184	GO:MF	GO:0046983	33	237	1073	3.03697
Ast_immune1	77	response to other organism	0.00122108	GO:BP	GO:0051707	45	235	1600	2.91326
Ast_immune1	78	response to external biotic stimulus	0.00124248	GO:BP	GO:0043207	45	235	1601	2.90571
Ast_immune1	79	cellular response to interferon-gamma	0.0012512	GO:BP	GO:0071346	13	235	177	2.90267
Ast_immune1	80	extracellular matrix organization	0.00136354	GO:BP	GO:0030198	20	235	419	2.86533
Ast_immune1	81	extracellular structure organization	0.0014154	GO:BP	GO:0043062	20	235	420	2.84912
Ast_immune1	82	negative regulation of biological process	0.0014573	GO:BP	GO:0048519	112	235	5861	2.83645
Ast_immune1	83	external encapsulating structure organization	0.00152456	GO:BP	GO:0045229	20	235	422	2.81686
Ast_immune1	84	positive regulation of cell motility	0.00190507	GO:BP	GO:2000147	24	235	592	2.72009
Ast_immune1	85	dendrite	0.00205213	GO:CC	GO:0030425	23	238	641	2.6878
Ast_immune1	86	dendritic tree	0.00215886	GO:CC	GO:0097447	23	238	643	2.66578
Ast_immune1	87	regulation of locomotion	0.00229287	GO:BP	GO:0040012	35	235	1113	2.63962
Ast_immune1	88	response to biotic stimulus	0.00237248	GO:BP	GO:0009607	45	235	1639	2.6248
Ast_immune1	89	tissue development	0.00258756	GO:BP	GO:0009888	53	235	2093	2.58711
Ast_immune1	90	negative regulation of cellular process	0.00262628	GO:BP	GO:0048523	101	235	5153	2.58066
Ast_immune1	91	positive regulation of locomotion	0.00296012	GO:BP	GO:0040017	24	235	607	2.52869
Ast_immune1	92	regulation of molecular function	0.00313078	GO:BP	GO:0065009	71	235	3191	2.50435
Ast_immune1	93	cartilage development	0.00353491	GO:BP	GO:0051216	13	235	194	2.45162
Ast_immune1	94	cell projection	0.00369081	GO:CC	GO:0042995	53	238	2337	2.43288
Ast_immune1	95	cell development	0.0039331	GO:BP	GO:0048468	53	235	2122	2.40527
Ast_immune1	96	response to interferon-gamma	0.00444081	GO:BP	GO:0034341	13	235	198	2.35254
Ast_immune1	97	positive regulation of response to stimulus	0.00462304	GO:BP	GO:0048584	57	235	2368	2.33507
Ast_immune1	98	plasma membrane bounded cell projection	0.0047169	GO:CC	GO:0120025	51	238	2234	2.32634
Ast_immune1	99	somatodendritic compartment	0.00495583	GO:CC	GO:0036477	27	238	875	2.30488
Ast_immune1	100	regulation of cell differentiation	0.00526158	GO:BP	GO:0045595	45	235	1688	2.27888
Ast_immune1	101	carbohydrate binding	0.00540394	GO:MF	GO:0030246	14	237	277	2.26729
Ast_immune1	102	growth factor binding	0.00543485	GO:MF	GO:0019838	10	237	141	2.26481
Ast_immune1	103	positive regulation of cellular process	0.00549374	GO:BP	GO:0048522	110	235	5863	2.26013
Ast_immune1	104	acute inflammatory response	0.00572239	GO:BP	GO:0002526	10	235	115	2.24242
Ast_immune1	105	Golgi apparatus	0.0057395	GO:CC	GO:0005794	40	238	1593	2.24113
Ast_immune1	106	inflammatory response	0.00620734	GO:BP	GO:0006954	31	235	962	2.20709
Ast_immune1	107	anchoring junction	0.00655467	GO:CC	GO:0070161	26	238	838	2.18345
Ast_immune1	108	cell junction organization	0.00670647	GO:BP	GO:0034330	26	235	727	2.17351
Ast_immune1	109	mesenchymal cell differentiation	0.0068692	GO:BP	GO:0048762	14	235	239	2.16309
Ast_immune1	110	focal adhesion	0.00773593	GO:CC	GO:0005925	17	238	420	2.11149
Ast_immune1	111	postsynaptic density	0.00848894	GO:CC	GO:0014069	15	238	339	2.07115
Ast_immune1	112	cell adhesion	0.00906787	GO:BP	GO:0007155	41	235	1502	2.04249
Ast_immune1	113	cell adhesion molecule binding	0.00916211	GO:MF	GO:0050839	20	237	544	2.038
Ast_immune1	114	cell-substrate junction	0.00953179	GO:CC	GO:0030055	17	238	427	2.02083
Ast_immune1	115	immune response	0.00956552	GO:BP	GO:0006955	59	235	2544	2.01929
Ast_immune1	116	type I interferon signaling pathway	0.00984088	GO:BP	GO:0060337	9	235	96	2.00697
Ast_immune1	117	biological adhesion	0.0101674	GO:BP	GO:0022610	41	235	1509	1.99279
Ast_immune1	118	asymmetric synapse	0.010392	GO:CC	GO:0032279	15	238	345	1.9833
Ast_immune1	119	cellular response to type I interferon	0.0107263	GO:BP	GO:0071357	9	235	97	1.96955
Ast_immune1	120	positive regulation of developmental process	0.0114536	GO:BP	GO:0051094	38	235	1354	1.94106
Ast_immune1	121	membrane	0.0115844	GO:CC	GO:0016020	154	238	9829	1.93613
Ast_immune1	122	regulation of cellular process	0.0127742	GO:BP	GO:0050794	181	235	11517	1.89367
Ast_immune1	123	cellular response to interleukin-1	0.0140115	GO:BP	GO:0071347	12	235	187	1.85352
Ast_immune1	124	enzyme linked receptor protein signaling pathway	0.0151173	GO:BP	GO:0007167	33	235	1107	1.82053
Ast_immune1	125	response to abiotic stimulus	0.015225	GO:BP	GO:0009628	36	235	1264	1.81744
Ast_immune1	126	response to type I interferon	0.016253	GO:BP	GO:0034340	9	235	102	1.78907
Ast_immune1	127	postsynaptic specialization	0.0185442	GO:CC	GO:0099572	15	238	363	1.73179
Ast_immune1	128	ion binding	0.0194262	GO:MF	GO:0043167	106	237	6056	1.71161
Ast_immune1	129	cell surface	0.0201231	GO:CC	GO:0009986	26	238	896	1.6963
Ast_immune1	130	14-3-3 protein binding	0.0201639	GO:MF	GO:0071889	5	237	32	1.69542
Ast_immune1	131	regulation of growth	0.0205882	GO:BP	GO:0040008	24	235	680	1.68638
Ast_immune1	132	cytoplasmic vesicle	0.0226706	GO:CC	GO:0031410	52	238	2433	1.64454
Ast_immune1	133	neuron to neuron synapse	0.0236891	GO:CC	GO:0098984	15	238	371	1.62545
Ast_immune1	134	intracellular vesicle	0.0239192	GO:CC	GO:0097708	52	238	2438	1.62125
Ast_immune1	135	regulation of biological process	0.0242983	GO:BP	GO:0050789	187	235	12122	1.61442
Ast_immune1	136	regulation of response to stress	0.0265449	GO:BP	GO:0080134	42	235	1626	1.57602
Ast_immune1	137	positive regulation of pri-miRNA transcription by RNA polymerase II	0.026902	GO:BP	GO:1902895	6	235	40	1.57022
Ast_immune1	138	signaling receptor binding	0.0270708	GO:MF	GO:0005102	38	237	1551	1.5675
Ast_immune1	139	wound healing	0.0274091	GO:BP	GO:0042060	21	235	555	1.56211
Ast_immune1	140	vesicle	0.0295084	GO:CC	GO:0031982	76	238	4058	1.53005
Ast_immune1	141	regulation of transforming growth factor beta production	0.0311745	GO:BP	GO:0071634	6	235	41	1.5062
Ast_immune1	142	extracellular matrix structural constituent	0.0314068	GO:MF	GO:0005201	10	237	173	1.50298
Ast_immune1	143	positive regulation of cell differentiation	0.0319008	GO:BP	GO:0045597	28	235	892	1.4962
Ast_immune1	144	developmental growth	0.0338174	GO:BP	GO:0048589	23	235	654	1.47086
Ast_immune1	145	cytoplasm	0.0384274	GO:CC	GO:0005737	177	238	11951	1.41536
Ast_immune1	146	innate immune response	0.0388751	GO:BP	GO:0045087	30	235	1003	1.41033
Ast_immune1	147	dendritic spine	0.039749	GO:CC	GO:0043197	10	238	186	1.40067
Ast_immune1	148	transforming growth factor beta production	0.0413633	GO:BP	GO:0071604	6	235	43	1.38339
Ast_immune1	149	polypeptide N-acetylgalactosaminyltransferase activity	0.043841	GO:MF	GO:0004653	4	237	20	1.35812
Ast_immune1	150	integrin binding	0.0440539	GO:MF	GO:0005178	9	237	146	1.35602
Ast_immune1	151	neuron spine	0.0453281	GO:CC	GO:0044309	10	238	189	1.34363
Ast_immune1	152	defense response to other organism	0.0460625	GO:BP	GO:0098542	34	235	1222	1.33665
Ast_immune1	153	animal organ development	0.0468983	GO:BP	GO:0048513	75	235	3701	1.32884
Ast_immune1	154	regulation of angiogenesis	0.047223	GO:BP	GO:0045765	16	235	361	1.32585
Ast_immune1	155	protein-containing complex binding	0.0475467	GO:MF	GO:0044877	33	237	1304	1.32288

## Sheet: Ast_immune2
sub-cluster	X	term_name	p_value	source	term_id	intersection_size	query_size	term_size	neg_log_p
Ast_immune2	1	GTPase activator activity	2.58906e-14	GO:MF	GO:0005096	30	177	456	13.5869
Ast_immune2	2	GTPase regulator activity	1.31725e-13	GO:MF	GO:0030695	30	177	484	12.8803
Ast_immune2	3	cell activation	4.6814e-13	GO:BP	GO:0001775	52	177	1507	12.3296
Ast_immune2	4	small GTPase mediated signal transduction	9.56929e-13	GO:BP	GO:0007264	31	177	520	12.0191
Ast_immune2	5	nucleoside-triphosphatase regulator activity	1.24092e-12	GO:MF	GO:0060589	30	177	526	11.9063
Ast_immune2	6	leukocyte activation	2.28336e-12	GO:BP	GO:0045321	48	177	1341	11.6414
Ast_immune2	7	lymphocyte activation	5.50013e-11	GO:BP	GO:0046649	35	177	780	10.2596
Ast_immune2	8	intracellular signal transduction	5.62577e-11	GO:BP	GO:0035556	70	177	2886	10.2498
Ast_immune2	9	immune system process	9.89707e-11	GO:BP	GO:0002376	77	177	3438	10.0045
Ast_immune2	10	positive regulation of hydrolase activity	3.07341e-10	GO:BP	GO:0051345	33	177	733	9.51238
Ast_immune2	11	positive regulation of GTPase activity	6.48357e-10	GO:BP	GO:0043547	25	177	414	9.18819
Ast_immune2	12	regulation of GTPase activity	6.91033e-10	GO:BP	GO:0043087	27	177	493	9.1605
Ast_immune2	13	hematopoietic or lymphoid organ development	1.98651e-09	GO:BP	GO:0048534	37	177	984	8.70191
Ast_immune2	14	immune system development	2.02897e-09	GO:BP	GO:0002520	38	177	1037	8.69272
Ast_immune2	15	hemopoiesis	3.01128e-09	GO:BP	GO:0030097	36	177	946	8.52125
Ast_immune2	16	regulation of response to stimulus	4.1082e-09	GO:BP	GO:0048583	86	177	4416	8.38635
Ast_immune2	17	positive regulation of molecular function	5.35103e-09	GO:BP	GO:0044093	50	177	1774	8.27156
Ast_immune2	18	enzyme activator activity	5.90867e-09	GO:MF	GO:0008047	30	177	730	8.22851
Ast_immune2	19	cell adhesion	1.18493e-08	GO:BP	GO:0007155	45	177	1502	7.92631
Ast_immune2	20	positive regulation of catalytic activity	1.18569e-08	GO:BP	GO:0043085	43	177	1383	7.92603
Ast_immune2	21	biological adhesion	1.38812e-08	GO:BP	GO:0022610	45	177	1509	7.85757
Ast_immune2	22	enzyme regulator activity	1.40165e-08	GO:MF	GO:0030234	33	177	911	7.85336
Ast_immune2	23	guanyl-nucleotide exchange factor activity	1.43049e-08	GO:MF	GO:0005085	17	177	216	7.84452
Ast_immune2	24	mononuclear cell differentiation	1.74093e-08	GO:BP	GO:1903131	24	177	440	7.75922
Ast_immune2	25	regulation of small GTPase mediated signal transduction	2.05655e-08	GO:BP	GO:0051056	21	177	329	7.68686
Ast_immune2	26	regulation of cell adhesion	2.07793e-08	GO:BP	GO:0030155	31	177	756	7.68237
Ast_immune2	27	regulation of catalytic activity	2.29559e-08	GO:BP	GO:0050790	59	177	2452	7.6391
Ast_immune2	28	signal transduction	2.34802e-08	GO:BP	GO:0007165	107	177	6447	7.6293
Ast_immune2	29	actin filament-based process	2.43358e-08	GO:BP	GO:0030029	32	177	810	7.61376
Ast_immune2	30	regulation of molecular function	2.58113e-08	GO:BP	GO:0065009	69	177	3191	7.58819
Ast_immune2	31	positive regulation of immune system process	3.00664e-08	GO:BP	GO:0002684	37	177	1079	7.52192
Ast_immune2	32	regulation of cell communication	5.60181e-08	GO:BP	GO:0010646	74	177	3634	7.25167
Ast_immune2	33	system development	8.83254e-08	GO:BP	GO:0048731	91	177	5095	7.05391
Ast_immune2	34	regulation of signaling	8.9865e-08	GO:BP	GO:0023051	74	177	3669	7.04641
Ast_immune2	35	cell migration	9.37544e-08	GO:BP	GO:0016477	46	177	1660	7.02801
Ast_immune2	36	leukocyte differentiation	1.01096e-07	GO:BP	GO:0002521	26	177	566	6.99526
Ast_immune2	37	regulation of immune system process	1.15464e-07	GO:BP	GO:0002682	47	177	1734	6.93755
Ast_immune2	38	actin cytoskeleton organization	1.23898e-07	GO:BP	GO:0030036	29	177	712	6.90694
Ast_immune2	39	positive regulation of cell adhesion	1.2591e-07	GO:BP	GO:0045785	23	177	442	6.89994
Ast_immune2	40	regulation of hydrolase activity	1.36593e-07	GO:BP	GO:0051336	39	177	1252	6.86457
Ast_immune2	41	anatomical structure development	1.82462e-07	GO:BP	GO:0048856	102	177	6164	6.73883
Ast_immune2	42	regulation of signal transduction	1.83704e-07	GO:BP	GO:0009966	68	177	3251	6.73588
Ast_immune2	43	signaling	1.88261e-07	GO:BP	GO:0023052	110	177	6937	6.72524
Ast_immune2	44	cell communication	2.39759e-07	GO:BP	GO:0007154	110	177	6961	6.62022
Ast_immune2	45	B cell activation	2.42779e-07	GO:BP	GO:0042113	20	177	337	6.61479
Ast_immune2	46	developmental process	2.65471e-07	GO:BP	GO:0032502	107	177	6678	6.57598
Ast_immune2	47	multicellular organism development	3.56336e-07	GO:BP	GO:0007275	96	177	5670	6.44814
Ast_immune2	48	lymphocyte differentiation	4.23403e-07	GO:BP	GO:0030098	21	177	387	6.37325
Ast_immune2	49	immune response-activating signal transduction	5.2233e-07	GO:BP	GO:0002757	23	177	475	6.28205
Ast_immune2	50	immune response-activating cell surface receptor signaling pathway	5.2233e-07	GO:BP	GO:0002429	23	177	475	6.28205
Ast_immune2	51	activation of immune response	5.61803e-07	GO:BP	GO:0002253	25	177	566	6.25042
Ast_immune2	52	cellular response to stimulus	1.75062e-06	GO:BP	GO:0051716	117	177	7873	5.75681
Ast_immune2	53	immune response-regulating cell surface receptor signaling pathway	2.07921e-06	GO:BP	GO:0002768	23	177	510	5.6821
Ast_immune2	54	immune response-regulating signaling pathway	2.32769e-06	GO:BP	GO:0002764	23	177	513	5.63307
Ast_immune2	55	cellular response to chemical stimulus	2.37068e-06	GO:BP	GO:0070887	68	177	3443	5.62513
Ast_immune2	56	positive regulation of immune response	2.43987e-06	GO:BP	GO:0050778	28	177	757	5.61263
Ast_immune2	57	molecular function regulator	2.47397e-06	GO:MF	GO:0098772	33	177	1115	5.60661
Ast_immune2	58	locomotion	2.59888e-06	GO:BP	GO:0040011	49	177	2039	5.58521
Ast_immune2	59	localization of cell	2.80502e-06	GO:BP	GO:0051674	46	177	1840	5.55206
Ast_immune2	60	cell motility	2.80502e-06	GO:BP	GO:0048870	46	177	1840	5.55206
Ast_immune2	61	cell surface receptor signaling pathway	3.02421e-06	GO:BP	GO:0007166	65	177	3226	5.51939
Ast_immune2	62	positive regulation of Fc receptor mediated stimulatory signaling pathway	3.47184e-06	GO:BP	GO:0060369	5	177	7	5.45944
Ast_immune2	63	cytokine-mediated signaling pathway	3.7066e-06	GO:BP	GO:0019221	29	177	824	5.43102
Ast_immune2	64	cytoplasm	5.66201e-06	GO:CC	GO:0005737	144	175	11951	5.24703
Ast_immune2	65	regulation of intracellular signal transduction	5.87632e-06	GO:BP	GO:1902531	46	177	1883	5.23089
Ast_immune2	66	cell-cell adhesion	6.30916e-06	GO:BP	GO:0098609	30	177	898	5.20003
Ast_immune2	67	regulation of cell-cell adhesion	6.41851e-06	GO:BP	GO:0022407	21	177	450	5.19257
Ast_immune2	68	cytosol	6.90742e-06	GO:CC	GO:0005829	84	175	5361	5.16068
Ast_immune2	69	movement of cell or subcellular component	7.72224e-06	GO:BP	GO:0006928	52	177	2319	5.11226
Ast_immune2	70	plasma membrane	9.29947e-06	GO:CC	GO:0005886	87	175	5680	5.03154
Ast_immune2	71	regulation of immune response	1.3246e-05	GO:BP	GO:0050776	34	177	1159	4.87791
Ast_immune2	72	positive regulation of response to stimulus	1.58971e-05	GO:BP	GO:0048584	52	177	2368	4.79868
Ast_immune2	73	anatomical structure morphogenesis	1.63929e-05	GO:BP	GO:0009653	58	177	2816	4.78534
Ast_immune2	74	immune response-regulating cell surface receptor signaling pathway involved in phagocytosis	1.69018e-05	GO:BP	GO:0002433	12	177	135	4.77207
Ast_immune2	75	Fc-gamma receptor signaling pathway involved in phagocytosis	1.69018e-05	GO:BP	GO:0038096	12	177	135	4.77207
Ast_immune2	76	cellular response to organic substance	1.75132e-05	GO:BP	GO:0071310	58	177	2821	4.75664
Ast_immune2	77	Fc-gamma receptor signaling pathway	1.99769e-05	GO:BP	GO:0038094	12	177	137	4.69947
Ast_immune2	78	animal organ development	2.02713e-05	GO:BP	GO:0048513	69	177	3701	4.69312
Ast_immune2	79	positive regulation of multicellular organismal process	2.27553e-05	GO:BP	GO:0051240	39	177	1497	4.64292
Ast_immune2	80	regulation of cell migration	2.32839e-05	GO:BP	GO:0030334	31	177	1008	4.63294
Ast_immune2	81	regulation of developmental process	2.48644e-05	GO:BP	GO:0050793	55	177	2621	4.60442
Ast_immune2	82	Fc receptor mediated stimulatory signaling pathway	2.76778e-05	GO:BP	GO:0002431	12	177	141	4.55787
Ast_immune2	83	regulation of B cell proliferation	3.02613e-05	GO:BP	GO:0030888	9	177	66	4.51911
Ast_immune2	84	T cell activation	3.40292e-05	GO:BP	GO:0042110	21	177	495	4.46815
Ast_immune2	85	B cell differentiation	4.09981e-05	GO:BP	GO:0030183	12	177	146	4.38724
Ast_immune2	86	response to organic substance	5.13703e-05	GO:BP	GO:0010033	65	177	3457	4.28929
Ast_immune2	87	cell periphery	5.39782e-05	GO:CC	GO:0071944	90	175	6178	4.26778
Ast_immune2	88	cellular developmental process	5.67154e-05	GO:BP	GO:0048869	77	177	4468	4.2463
Ast_immune2	89	positive regulation of biological process	5.82351e-05	GO:BP	GO:0048518	99	177	6474	4.23482
Ast_immune2	90	regulation of cell activation	6.1853e-05	GO:BP	GO:0050865	24	177	662	4.20864
Ast_immune2	91	cell differentiation	6.28877e-05	GO:BP	GO:0030154	76	177	4392	4.20143
Ast_immune2	92	regulation of locomotion	6.39645e-05	GO:BP	GO:0040012	32	177	1113	4.19406
Ast_immune2	93	leukocyte cell-cell adhesion	6.48034e-05	GO:BP	GO:0007159	18	177	377	4.1884
Ast_immune2	94	immune response	6.58721e-05	GO:BP	GO:0006955	53	177	2544	4.1813
Ast_immune2	95	regulation of Fc receptor mediated stimulatory signaling pathway	7.39935e-05	GO:BP	GO:0060368	5	177	11	4.13081
Ast_immune2	96	positive regulation of cell activation	7.79261e-05	GO:BP	GO:0050867	19	177	426	4.10832
Ast_immune2	97	regulation of leukocyte cell-cell adhesion	8.536e-05	GO:BP	GO:1903037	17	177	341	4.06875
Ast_immune2	98	positive regulation of Fc-gamma receptor signaling pathway involved in phagocytosis	8.72904e-05	GO:BP	GO:1905451	4	177	5	4.05903
Ast_immune2	99	regulation of lymphocyte activation	8.74558e-05	GO:BP	GO:0051249	21	177	523	4.05821
Ast_immune2	100	regulation of cell motility	9.15379e-05	GO:BP	GO:2000145	31	177	1070	4.0384
Ast_immune2	101	regulation of phagocytosis	9.9253e-05	GO:BP	GO:0050764	10	177	100	4.00326
Ast_immune2	102	B cell proliferation	0.000109239	GO:BP	GO:0042100	10	177	101	3.96162
Ast_immune2	103	negative regulation of cellular process	0.000111301	GO:BP	GO:0048523	84	177	5153	3.9535
Ast_immune2	104	small GTPase binding	0.000123102	GO:MF	GO:0031267	14	177	263	3.90973
Ast_immune2	105	anatomical structure formation involved in morphogenesis	0.000129312	GO:BP	GO:0048646	33	177	1209	3.88836
Ast_immune2	106	cellular response to cytokine stimulus	0.000131124	GO:BP	GO:0071345	32	177	1148	3.88232
Ast_immune2	107	protein domain specific binding	0.000135593	GO:MF	GO:0019904	23	177	706	3.86776
Ast_immune2	108	Fc receptor signaling pathway	0.00018669	GO:BP	GO:0038093	14	177	238	3.72888
Ast_immune2	109	negative regulation of biological process	0.00020571	GO:BP	GO:0048519	91	177	5861	3.68674
Ast_immune2	110	antigen receptor-mediated signaling pathway	0.000217918	GO:BP	GO:0050851	16	177	321	3.66171
Ast_immune2	111	regulation of response to external stimulus	0.000225312	GO:BP	GO:0032101	33	177	1238	3.64722
Ast_immune2	112	cell development	0.000232403	GO:BP	GO:0048468	46	177	2122	3.63376
Ast_immune2	113	positive regulation of lymphocyte activation	0.00023668	GO:BP	GO:0051251	17	177	366	3.62584
Ast_immune2	114	positive regulation of leukocyte cell-cell adhesion	0.000241394	GO:BP	GO:1903039	14	177	243	3.61727
Ast_immune2	115	positive regulation of locomotion	0.000245925	GO:BP	GO:0040017	22	177	607	3.6092
Ast_immune2	116	positive regulation of leukocyte activation	0.000265573	GO:BP	GO:0002696	18	177	414	3.57582
Ast_immune2	117	leukocyte migration	0.000283601	GO:BP	GO:0050900	20	177	511	3.54729
Ast_immune2	118	positive regulation of cell-cell adhesion	0.000287177	GO:BP	GO:0022409	15	177	286	3.54185
Ast_immune2	119	cell junction	0.000310663	GO:CC	GO:0030054	42	175	2107	3.50771
Ast_immune2	120	regulation of leukocyte activation	0.000326016	GO:BP	GO:0002694	22	177	617	3.48676
Ast_immune2	121	myeloid leukocyte activation	0.000336788	GO:BP	GO:0002274	23	177	671	3.47264
Ast_immune2	122	positive regulation of cell migration	0.000350435	GO:BP	GO:0030335	21	177	568	3.45539
Ast_immune2	123	negative regulation of response to stimulus	0.000359693	GO:BP	GO:0048585	43	177	1938	3.44407
Ast_immune2	124	regulation of cellular component movement	0.000448281	GO:BP	GO:0051270	31	177	1149	3.34845
Ast_immune2	125	GTPase binding	0.000491213	GO:MF	GO:0051020	14	177	295	3.30873
Ast_immune2	126	regulation of T cell activation	0.00049512	GO:BP	GO:0050863	16	177	341	3.30529
Ast_immune2	127	cytokine binding	0.000498743	GO:MF	GO:0019955	10	177	140	3.30212
Ast_immune2	128	phagocytosis	0.000541825	GO:BP	GO:0006909	17	177	388	3.26614
Ast_immune2	129	positive regulation of T cell activation	0.000545647	GO:BP	GO:0050870	13	177	221	3.26309
Ast_immune2	130	regulation of Fc-gamma receptor signaling pathway involved in phagocytosis	0.000601738	GO:BP	GO:1905449	4	177	7	3.22059
Ast_immune2	131	positive regulation of signal transduction	0.000619255	GO:BP	GO:0009967	38	177	1626	3.20813
Ast_immune2	132	regulation of antigen receptor-mediated signaling pathway	0.000634016	GO:BP	GO:0050854	8	177	68	3.1979
Ast_immune2	133	regulation of biological quality	0.000677385	GO:BP	GO:0065008	70	177	4116	3.16916
Ast_immune2	134	positive regulation of cell motility	0.000693584	GO:BP	GO:2000147	21	177	592	3.1589
Ast_immune2	135	regulation of anatomical structure morphogenesis	0.000694694	GO:BP	GO:0022603	29	177	1048	3.15821
Ast_immune2	136	regulation of cellular component biogenesis	0.000749816	GO:BP	GO:0044087	28	177	991	3.12505
Ast_immune2	137	actin filament organization	0.000770097	GO:BP	GO:0007015	18	177	445	3.11345
Ast_immune2	138	response to cytokine	0.000777071	GO:BP	GO:0034097	32	177	1242	3.10954
Ast_immune2	139	B cell homeostasis	0.000779348	GO:BP	GO:0001782	6	177	30	3.10827
Ast_immune2	140	response to chemical	0.000787063	GO:BP	GO:0042221	78	177	4829	3.10399
Ast_immune2	141	cell surface	0.000828049	GO:CC	GO:0009986	24	175	896	3.08194
Ast_immune2	142	regulation of localization	0.000853039	GO:BP	GO:0032879	55	177	2906	3.06903
Ast_immune2	143	chemotaxis	0.000879459	GO:BP	GO:0006935	22	177	654	3.05578
Ast_immune2	144	cytoplasmic vesicle	0.000892196	GO:CC	GO:0031410	45	175	2433	3.04954
Ast_immune2	145	positive regulation of intracellular signal transduction	0.000931571	GO:BP	GO:1902533	29	177	1063	3.03078
Ast_immune2	146	intracellular vesicle	0.00094295	GO:CC	GO:0097708	45	175	2438	3.02551
Ast_immune2	147	taxis	0.000949988	GO:BP	GO:0042330	22	177	657	3.02228
Ast_immune2	148	response to stimulus	0.000978273	GO:BP	GO:0050896	125	177	9487	3.00954
Ast_immune2	149	positive regulation of cellular component movement	0.00098881	GO:BP	GO:0051272	21	177	605	3.00489
Ast_immune2	150	positive regulation of cellular process	0.0010317	GO:BP	GO:0048522	89	177	5863	2.98645
Ast_immune2	151	regulation of B cell activation	0.0010977	GO:BP	GO:0050864	12	177	197	2.95952
Ast_immune2	152	immune effector process	0.00111843	GO:BP	GO:0002252	30	177	1135	2.95139
Ast_immune2	153	positive regulation of cell communication	0.00119058	GO:BP	GO:0010647	40	177	1809	2.92424
Ast_immune2	154	negative regulation of immune system process	0.00125651	GO:BP	GO:0002683	21	177	614	2.90083
Ast_immune2	155	positive regulation of signaling	0.00127839	GO:BP	GO:0023056	40	177	1814	2.89334
Ast_immune2	156	positive regulation of Ras protein signal transduction	0.0013654	GO:BP	GO:0046579	8	177	75	2.86474
Ast_immune2	157	cell junction organization	0.00137113	GO:BP	GO:0034330	23	177	727	2.86292
Ast_immune2	158	nervous system development	0.00140938	GO:BP	GO:0007399	49	177	2484	2.85097
Ast_immune2	159	regulation of cytokine production	0.001545	GO:BP	GO:0001817	25	177	847	2.81107
Ast_immune2	160	leukocyte proliferation	0.00158846	GO:BP	GO:0070661	15	177	327	2.79902
Ast_immune2	161	microglial cell activation	0.0015889	GO:BP	GO:0001774	7	177	53	2.7989
Ast_immune2	162	regulation of anatomical structure size	0.00163218	GO:BP	GO:0090066	19	177	519	2.78723
Ast_immune2	163	cytokine production	0.00179537	GO:BP	GO:0001816	25	177	854	2.74585
Ast_immune2	164	multicellular organismal process	0.00197213	GO:BP	GO:0032501	110	177	8000	2.70506
Ast_immune2	165	SH3 domain binding	0.00215852	GO:MF	GO:0017124	9	177	129	2.66584
Ast_immune2	166	macrophage activation	0.00243352	GO:BP	GO:0042116	9	177	109	2.61377
Ast_immune2	167	lymphocyte proliferation	0.00261747	GO:BP	GO:0046651	14	177	296	2.58212
Ast_immune2	168	regulation of cellular component size	0.0027444	GO:BP	GO:0032535	16	177	388	2.56155
Ast_immune2	169	mononuclear cell proliferation	0.00294823	GO:BP	GO:0032943	14	177	299	2.53044
Ast_immune2	170	positive regulation of small GTPase mediated signal transduction	0.00298733	GO:BP	GO:0051057	8	177	83	2.52472
Ast_immune2	171	regulation of multicellular organismal development	0.0031642	GO:BP	GO:2000026	34	177	1459	2.49974
Ast_immune2	172	enzyme binding	0.00347269	GO:MF	GO:0019899	40	177	2048	2.45933
Ast_immune2	173	cytoskeleton organization	0.00391622	GO:BP	GO:0007010	34	177	1473	2.40713
Ast_immune2	174	Ras protein signal transduction	0.0039745	GO:BP	GO:0007265	15	177	352	2.40072
Ast_immune2	175	cell chemotaxis	0.00450481	GO:BP	GO:0060326	14	177	310	2.34632
Ast_immune2	176	regulation of phosphorylation	0.00485521	GO:BP	GO:0042325	33	177	1419	2.31379
Ast_immune2	177	positive regulation of developmental process	0.00505395	GO:BP	GO:0051094	32	177	1354	2.29637
Ast_immune2	178	membrane raft	0.00516428	GO:CC	GO:0045121	13	175	339	2.28699
Ast_immune2	179	membrane microdomain	0.00516428	GO:CC	GO:0098857	13	175	339	2.28699
Ast_immune2	180	regulated exocytosis	0.00562075	GO:BP	GO:0045055	23	177	790	2.25021
Ast_immune2	181	positive regulation of leukocyte proliferation	0.0059267	GO:BP	GO:0070665	10	177	155	2.22719
Ast_immune2	182	cell death	0.00631354	GO:BP	GO:0008219	45	177	2306	2.19973
Ast_immune2	183	regulation of kinase activity	0.00681711	GO:BP	GO:0043549	25	177	920	2.1664
Ast_immune2	184	positive regulation of B cell proliferation	0.00720276	GO:BP	GO:0030890	6	177	43	2.1425
Ast_immune2	185	regulation of protein phosphorylation	0.00757926	GO:BP	GO:0001932	30	177	1246	2.12037
Ast_immune2	186	response to external stimulus	0.00778039	GO:BP	GO:0009605	55	177	3114	2.109
Ast_immune2	187	positive regulation of phosphorylation	0.00793832	GO:BP	GO:0042327	25	177	928	2.10027
Ast_immune2	188	protein-containing complex binding	0.00801469	GO:MF	GO:0044877	29	177	1304	2.09611
Ast_immune2	189	regulation of protein kinase activity	0.00833989	GO:BP	GO:0045859	23	177	809	2.07884
Ast_immune2	190	positive regulation of phagocytosis	0.00883563	GO:BP	GO:0050766	7	177	68	2.05376
Ast_immune2	191	regulation of multicellular organismal process	0.00918835	GO:BP	GO:0051239	52	177	2888	2.03676
Ast_immune2	192	protein phosphorylation	0.00928467	GO:BP	GO:0006468	36	177	1673	2.03223
Ast_immune2	193	regulation of Ras protein signal transduction	0.00977779	GO:BP	GO:0046578	11	177	202	2.00976
Ast_immune2	194	anchoring junction	0.00989305	GO:CC	GO:0070161	21	175	838	2.00467
Ast_immune2	195	cell projection	0.00996888	GO:CC	GO:0042995	41	175	2337	2.00135
Ast_immune2	196	dendrite development	0.0116585	GO:BP	GO:0016358	12	177	247	1.93336
Ast_immune2	197	myeloid cell differentiation	0.0122402	GO:BP	GO:0030099	16	177	436	1.91221
Ast_immune2	198	signaling receptor binding	0.0122892	GO:MF	GO:0005102	32	177	1551	1.91048
Ast_immune2	199	neurogenesis	0.0129676	GO:BP	GO:0022008	36	177	1698	1.88714
Ast_immune2	200	tube morphogenesis	0.0133258	GO:BP	GO:0035239	25	177	956	1.87531
Ast_immune2	201	phosphorylation	0.0138866	GO:BP	GO:0016310	40	177	1996	1.85741
Ast_immune2	202	B cell receptor signaling pathway	0.0143615	GO:BP	GO:0050853	9	177	135	1.8428
Ast_immune2	203	regulation of leukocyte proliferation	0.0148798	GO:BP	GO:0070663	12	177	253	1.8274
Ast_immune2	204	negative regulation of cell communication	0.0156265	GO:BP	GO:0010648	33	177	1499	1.80614
Ast_immune2	205	MAPK cascade	0.0156649	GO:BP	GO:0000165	25	177	965	1.80507
Ast_immune2	206	negative regulation of signaling	0.0162945	GO:BP	GO:0023057	33	177	1502	1.78796
Ast_immune2	207	leukocyte activation involved in immune response	0.0163538	GO:BP	GO:0002366	21	177	723	1.78638
Ast_immune2	208	positive regulation of protein phosphorylation	0.0173281	GO:BP	GO:0001934	23	177	846	1.76125
Ast_immune2	209	cell activation involved in immune response	0.0177824	GO:BP	GO:0002263	21	177	727	1.75001
Ast_immune2	210	dendritic spine	0.0184138	GO:CC	GO:0043197	9	175	186	1.73486
Ast_immune2	211	negative regulation of cell activation	0.0185	GO:BP	GO:0050866	11	177	216	1.73283
Ast_immune2	212	positive regulation of lymphocyte differentiation	0.0188791	GO:BP	GO:0045621	8	177	106	1.72402
Ast_immune2	213	side of membrane	0.0205793	GO:CC	GO:0098552	17	175	622	1.68657
Ast_immune2	214	neuron spine	0.0208367	GO:CC	GO:0044309	9	175	189	1.68117
Ast_immune2	215	myeloid leukocyte migration	0.0219939	GO:BP	GO:0097529	11	177	220	1.6577
Ast_immune2	216	T cell differentiation	0.0228559	GO:BP	GO:0030217	12	177	264	1.641
Ast_immune2	217	protein binding	0.0236394	GO:MF	GO:0005515	160	177	14767	1.62636
Ast_immune2	218	response to oxygen-containing compound	0.0246881	GO:BP	GO:1901700	36	177	1748	1.60751
Ast_immune2	219	negative regulation of signal transduction	0.0253602	GO:BP	GO:0009968	31	177	1394	1.59585
Ast_immune2	220	positive regulation of response to external stimulus	0.0268668	GO:BP	GO:0032103	17	177	518	1.57078
Ast_immune2	221	regulation of MAP kinase activity	0.0285035	GO:BP	GO:0043405	13	177	316	1.5451
Ast_immune2	222	regulation of actin cytoskeleton organization	0.0291435	GO:BP	GO:0032956	14	177	365	1.53546
Ast_immune2	223	leukocyte chemotaxis	0.0295013	GO:BP	GO:0030595	11	177	227	1.53016
Ast_immune2	224	positive regulation of phosphorus metabolic process	0.0302632	GO:BP	GO:0010562	25	177	1003	1.51909
Ast_immune2	225	positive regulation of phosphate metabolic process	0.0302632	GO:BP	GO:0045937	25	177	1003	1.51909
Ast_immune2	226	positive regulation of immune effector process	0.0307373	GO:BP	GO:0002699	11	177	228	1.51233
Ast_immune2	227	phosphotyrosine residue binding	0.0322914	GO:MF	GO:0001784	5	177	44	1.49091
Ast_immune2	228	vesicle	0.032842	GO:CC	GO:0031982	59	175	4058	1.48357
Ast_immune2	229	export from cell	0.0330924	GO:BP	GO:0140352	31	177	1413	1.48027
Ast_immune2	230	transmembrane receptor protein tyrosine kinase signaling pathway	0.03396	GO:BP	GO:0007169	21	177	759	1.46903
Ast_immune2	231	activation of GTPase activity	0.0343705	GO:BP	GO:0090630	8	177	115	1.46381
Ast_immune2	232	external side of plasma membrane	0.035332	GO:CC	GO:0009897	13	175	409	1.45183
Ast_immune2	233	positive regulation of B cell activation	0.0354705	GO:BP	GO:0050871	9	177	151	1.45013
Ast_immune2	234	regulation of lymphocyte proliferation	0.0361422	GO:BP	GO:0050670	11	177	232	1.44199
Ast_immune2	235	regulation of mononuclear cell proliferation	0.0391408	GO:BP	GO:0032944	11	177	234	1.40737
Ast_immune2	236	positive regulation of cell differentiation	0.0403852	GO:BP	GO:0045597	23	177	892	1.39378
Ast_immune2	237	negative regulation of leukocyte activation	0.0409819	GO:BP	GO:0002695	10	177	193	1.38741
Ast_immune2	238	actin filament polymerization	0.0428489	GO:BP	GO:0030041	10	177	194	1.36806
Ast_immune2	239	leukocyte degranulation	0.0436264	GO:BP	GO:0043299	17	177	538	1.36025
Ast_immune2	240	generation of neurons	0.0438661	GO:BP	GO:0048699	33	177	1576	1.35787
Ast_immune2	241	secretory granule membrane	0.0439064	GO:CC	GO:0030667	11	175	308	1.35747
Ast_immune2	242	neuron development	0.0445032	GO:BP	GO:0048666	27	177	1159	1.35161
Ast_immune2	243	synapse organization	0.046148	GO:BP	GO:0050808	15	177	432	1.33585
Ast_immune2	244	regulation of cellular process	0.0475632	GO:BP	GO:0050794	138	177	11517	1.32273
Ast_immune2	245	regulation of cell shape	0.0483704	GO:BP	GO:0008360	9	177	157	1.31542
Ast_immune2	246	interferon-gamma-mediated signaling pathway	0.0491155	GO:BP	GO:0060333	7	177	88	1.30878

## Sheet: Ast_protoplasmic2
sub-cluster	X	term_name	p_value	source	term_id	intersection_size	query_size	term_size	neg_log_p
Ast_protoplasmic2	1	postsynaptic density membrane	7.31366e-12	GO:CC	GO:0098839	9	32	94	11.1359
Ast_protoplasmic2	2	postsynaptic specialization membrane	6.98767e-11	GO:CC	GO:0099634	9	32	120	10.1557
Ast_protoplasmic2	3	integral component of postsynaptic density membrane	4.97309e-10	GO:CC	GO:0099061	7	32	51	9.30337
Ast_protoplasmic2	4	intrinsic component of postsynaptic density membrane	8.67649e-10	GO:CC	GO:0099146	7	32	55	9.06166
Ast_protoplasmic2	5	integral component of postsynaptic membrane	3.85118e-09	GO:CC	GO:0099055	8	32	118	8.41441
Ast_protoplasmic2	6	postsynaptic membrane	5.11656e-09	GO:CC	GO:0045211	10	32	282	8.29102
Ast_protoplasmic2	7	intrinsic component of postsynaptic membrane	5.75664e-09	GO:CC	GO:0098936	8	32	124	8.23983
Ast_protoplasmic2	8	integral component of postsynaptic specialization membrane	7.52716e-09	GO:CC	GO:0099060	7	32	74	8.12337
Ast_protoplasmic2	9	intrinsic component of postsynaptic specialization membrane	1.09994e-08	GO:CC	GO:0098948	7	32	78	7.95863
Ast_protoplasmic2	10	integral component of synaptic membrane	2.96857e-08	GO:CC	GO:0099699	8	32	152	7.52745
Ast_protoplasmic2	11	postsynaptic density	3.11843e-08	GO:CC	GO:0014069	10	32	339	7.50606
Ast_protoplasmic2	12	asymmetric synapse	3.70138e-08	GO:CC	GO:0032279	10	32	345	7.43164
Ast_protoplasmic2	13	intrinsic component of synaptic membrane	6.00827e-08	GO:CC	GO:0099240	8	32	166	7.22125
Ast_protoplasmic2	14	postsynaptic specialization	6.07762e-08	GO:CC	GO:0099572	10	32	363	7.21627
Ast_protoplasmic2	15	neuron to neuron synapse	7.51394e-08	GO:CC	GO:0098984	10	32	371	7.12413
Ast_protoplasmic2	16	synaptic membrane	1.05004e-07	GO:CC	GO:0097060	10	32	384	6.97879
Ast_protoplasmic2	17	postsynapse	9.5842e-07	GO:CC	GO:0098794	11	32	641	6.01844
Ast_protoplasmic2	18	glutamatergic synapse	1.12127e-06	GO:CC	GO:0098978	9	32	354	5.95029
Ast_protoplasmic2	19	synapse	2.57841e-06	GO:CC	GO:0045202	14	32	1348	5.58865
Ast_protoplasmic2	20	synapse organization	2.60945e-06	GO:BP	GO:0050808	10	31	432	5.58345
Ast_protoplasmic2	21	ionotropic glutamate receptor complex	3.37677e-06	GO:CC	GO:0008328	5	32	47	5.4715
Ast_protoplasmic2	22	neurotransmitter receptor complex	4.1878e-06	GO:CC	GO:0098878	5	32	49	5.37801
Ast_protoplasmic2	23	cell junction	1.25745e-05	GO:CC	GO:0030054	16	32	2107	4.90051
Ast_protoplasmic2	24	AMPA glutamate receptor complex	2.28237e-05	GO:CC	GO:0032281	4	32	26	4.64161
Ast_protoplasmic2	25	cell periphery	3.71979e-05	GO:CC	GO:0071944	25	32	6178	4.42948
Ast_protoplasmic2	26	glutamate receptor activity	4.04744e-05	GO:MF	GO:0008066	4	31	27	4.39282
Ast_protoplasmic2	27	ion channel complex	0.000136067	GO:CC	GO:0034702	7	32	302	3.86625
Ast_protoplasmic2	28	dendritic spine	0.000141304	GO:CC	GO:0043197	6	32	186	3.84985
Ast_protoplasmic2	29	neuron spine	0.000155195	GO:CC	GO:0044309	6	32	189	3.80912
Ast_protoplasmic2	30	transmembrane transporter complex	0.000222548	GO:CC	GO:1902495	7	32	325	3.65258
Ast_protoplasmic2	31	integral component of plasma membrane	0.000250373	GO:CC	GO:0005887	13	32	1643	3.60141
Ast_protoplasmic2	32	plasma membrane	0.000281195	GO:CC	GO:0005886	23	32	5680	3.55099
Ast_protoplasmic2	33	transporter complex	0.000300785	GO:CC	GO:1990351	7	32	340	3.52174
Ast_protoplasmic2	34	anterograde trans-synaptic signaling	0.000301234	GO:BP	GO:0098916	10	31	713	3.5211
Ast_protoplasmic2	35	chemical synaptic transmission	0.000301234	GO:BP	GO:0007268	10	31	713	3.5211
Ast_protoplasmic2	36	trans-synaptic signaling	0.000334114	GO:BP	GO:0099537	10	31	721	3.4761
Ast_protoplasmic2	37	cell junction organization	0.000360813	GO:BP	GO:0034330	10	31	727	3.44272
Ast_protoplasmic2	38	intrinsic component of plasma membrane	0.00043528	GO:CC	GO:0031226	13	32	1725	3.36123
Ast_protoplasmic2	39	cation channel complex	0.000451484	GO:CC	GO:0034703	6	32	227	3.34536
Ast_protoplasmic2	40	dendritic spine membrane	0.000459762	GO:CC	GO:0032591	3	32	15	3.33747
Ast_protoplasmic2	41	synaptic signaling	0.000463904	GO:BP	GO:0099536	10	31	747	3.33357
Ast_protoplasmic2	42	regulation of ion transmembrane transporter activity	0.000708113	GO:BP	GO:0032412	7	31	284	3.1499
Ast_protoplasmic2	43	plasma membrane region	0.000753584	GO:CC	GO:0098590	11	32	1240	3.12287
Ast_protoplasmic2	44	modulation of chemical synaptic transmission	0.000850468	GO:BP	GO:0050804	8	31	434	3.07034
Ast_protoplasmic2	45	regulation of trans-synaptic signaling	0.000865409	GO:BP	GO:0099177	8	31	435	3.06278
Ast_protoplasmic2	46	regulation of transmembrane transporter activity	0.000914652	GO:BP	GO:0022898	7	31	295	3.03874
Ast_protoplasmic2	47	regulation of synaptic plasticity	0.00121423	GO:BP	GO:0048167	6	31	189	2.9157
Ast_protoplasmic2	48	regulation of postsynaptic cytosolic calcium ion concentration	0.00127729	GO:BP	GO:0099566	3	31	11	2.89371
Ast_protoplasmic2	49	regulation of transporter activity	0.00148222	GO:BP	GO:0032409	7	31	317	2.82909
Ast_protoplasmic2	50	ionotropic glutamate receptor activity	0.00150348	GO:MF	GO:0004970	3	31	19	2.8229
Ast_protoplasmic2	51	regulation of cation channel activity	0.00174024	GO:BP	GO:2001257	6	31	201	2.75939
Ast_protoplasmic2	52	dendrite	0.00196232	GO:CC	GO:0030425	8	32	641	2.70723
Ast_protoplasmic2	53	dendritic tree	0.00200749	GO:CC	GO:0097447	8	32	643	2.69735
Ast_protoplasmic2	54	somatodendritic compartment	0.00229411	GO:CC	GO:0036477	9	32	875	2.63939
Ast_protoplasmic2	55	Schaffer collateral - CA1 synapse	0.00275057	GO:CC	GO:0098685	4	32	84	2.56058
Ast_protoplasmic2	56	neurotransmitter receptor activity involved in regulation of postsynaptic cytosolic calcium ion concentration	0.00304908	GO:MF	GO:0099583	2	31	3	2.51583
Ast_protoplasmic2	57	plasma membrane protein complex	0.00357118	GO:CC	GO:0098797	8	32	696	2.44719
Ast_protoplasmic2	58	glutamate receptor signaling pathway	0.00359722	GO:BP	GO:0007215	4	31	54	2.44403
Ast_protoplasmic2	59	PDZ domain binding	0.00478915	GO:MF	GO:0030165	4	31	87	2.31974
Ast_protoplasmic2	60	AMPA glutamate receptor activity	0.00609185	GO:MF	GO:0004971	2	31	4	2.21525
Ast_protoplasmic2	61	neurotransmitter receptor activity	0.0108494	GO:MF	GO:0030594	4	31	107	1.96459
Ast_protoplasmic2	62	cell-cell adhesion via plasma-membrane adhesion molecules	0.0108914	GO:BP	GO:0098742	6	31	276	1.96292
Ast_protoplasmic2	63	dendrite membrane	0.0120761	GO:CC	GO:0032590	3	32	43	1.91807
Ast_protoplasmic2	64	neuron projection	0.0141881	GO:CC	GO:0043005	10	32	1384	1.84807
Ast_protoplasmic2	65	regulation of neurotransmitter receptor activity	0.0174406	GO:BP	GO:0099601	4	31	80	1.75844
Ast_protoplasmic2	66	excitatory synapse	0.017905	GO:CC	GO:0060076	3	32	49	1.74703
Ast_protoplasmic2	67	ionotropic glutamate receptor signaling pathway	0.0197801	GO:BP	GO:0035235	3	31	26	1.70377
Ast_protoplasmic2	68	synaptic membrane adhesion	0.0222269	GO:BP	GO:0099560	3	31	27	1.65312
Ast_protoplasmic2	69	ion channel activity	0.0260858	GO:MF	GO:0005216	6	31	434	1.5836
Ast_protoplasmic2	70	ion transmembrane transport	0.0262937	GO:BP	GO:0034220	10	31	1169	1.58015
Ast_protoplasmic2	71	regulation of signaling receptor activity	0.0268027	GO:BP	GO:0010469	5	31	188	1.57182
Ast_protoplasmic2	72	ligand-gated channel activity	0.0318901	GO:MF	GO:0022834	4	31	141	1.49634
Ast_protoplasmic2	73	ligand-gated ion channel activity	0.0318901	GO:MF	GO:0015276	4	31	141	1.49634
Ast_protoplasmic2	74	plasma membrane signaling receptor complex	0.0319061	GO:CC	GO:0098802	5	32	300	1.49613
Ast_protoplasmic2	75	neuron projection membrane	0.0344987	GO:CC	GO:0032589	3	32	61	1.4622
Ast_protoplasmic2	76	integral component of membrane	0.0357028	GO:CC	GO:0016021	20	32	5718	1.4473
Ast_protoplasmic2	77	regulation of ion transmembrane transport	0.038315	GO:BP	GO:0034765	7	31	520	1.41663
Ast_protoplasmic2	78	regulation of localization	0.0454002	GO:BP	GO:0032879	15	31	2906	1.34294
Ast_protoplasmic2	79	channel activity	0.0469909	GO:MF	GO:0015267	6	31	483	1.32799
Ast_protoplasmic2	80	passive transmembrane transporter activity	0.0469909	GO:MF	GO:0022803	6	31	483	1.32799
Ast_protoplasmic2	81	regulation of synapse organization	0.0477775	GO:BP	GO:0050807	5	31	212	1.32078
Ast_protoplasmic2	82	regulation of cytosolic calcium ion concentration	0.0483904	GO:BP	GO:0051480	6	31	359	1.31524
Ast_protoplasmic2	83	receptor complex	0.0488773	GO:CC	GO:0043235	6	32	522	1.31089

## Sheet: Ast_protoplasmic1
sub-cluster	X	term_name	p_value	source	term_id	intersection_size	query_size	term_size	neg_log_p
Ast_protoplasmic1	1	nervous system development	9.26945e-08	GO:BP	GO:0007399	28	55	2484	7.03295
Ast_protoplasmic1	2	synapse	1.14948e-07	GO:CC	GO:0045202	20	55	1348	6.9395
Ast_protoplasmic1	3	generation of neurons	5.59017e-07	GO:BP	GO:0048699	22	55	1576	6.25257
Ast_protoplasmic1	4	neuron differentiation	6.3512e-07	GO:BP	GO:0030182	21	55	1427	6.19714
Ast_protoplasmic1	5	neurogenesis	2.3122e-06	GO:BP	GO:0022008	22	55	1698	5.63598
Ast_protoplasmic1	6	synaptic membrane	2.92895e-06	GO:CC	GO:0097060	11	55	384	5.53329
Ast_protoplasmic1	7	postsynapse	6.99633e-06	GO:CC	GO:0098794	13	55	641	5.15513
Ast_protoplasmic1	8	neuron development	7.50109e-06	GO:BP	GO:0048666	18	55	1159	5.12488
Ast_protoplasmic1	9	cell projection organization	7.61959e-06	GO:BP	GO:0030030	21	55	1636	5.11807
Ast_protoplasmic1	10	cell junction	8.23914e-06	GO:CC	GO:0030054	22	55	2107	5.08412
Ast_protoplasmic1	11	neuron projection morphogenesis	1.48679e-05	GO:BP	GO:0048812	14	55	670	4.82775
Ast_protoplasmic1	12	plasma membrane bounded cell projection morphogenesis	1.93192e-05	GO:BP	GO:0120039	14	55	684	4.71401
Ast_protoplasmic1	13	cell projection morphogenesis	2.07971e-05	GO:BP	GO:0048858	14	55	688	4.682
Ast_protoplasmic1	14	cell part morphogenesis	2.82975e-05	GO:BP	GO:0032990	14	55	705	4.54825
Ast_protoplasmic1	15	plasma membrane bounded cell projection organization	3.10626e-05	GO:BP	GO:0120036	20	55	1596	4.50776
Ast_protoplasmic1	16	cell projection	5.30776e-05	GO:CC	GO:0042995	22	55	2337	4.27509
Ast_protoplasmic1	17	neuron projection development	6.0755e-05	GO:BP	GO:0031175	16	55	1021	4.21642
Ast_protoplasmic1	18	plasma membrane region	7.09056e-05	GO:CC	GO:0098590	16	55	1240	4.14932
Ast_protoplasmic1	19	integral component of synaptic membrane	7.2726e-05	GO:CC	GO:0099699	7	55	152	4.13831
Ast_protoplasmic1	20	cell morphogenesis	8.39609e-05	GO:BP	GO:0000902	16	55	1045	4.07592
Ast_protoplasmic1	21	cellular component morphogenesis	0.000130892	GO:BP	GO:0032989	14	55	797	3.88309
Ast_protoplasmic1	22	intrinsic component of synaptic membrane	0.000132202	GO:CC	GO:0099240	7	55	166	3.87876
Ast_protoplasmic1	23	plasma membrane	0.000258626	GO:CC	GO:0005886	34	55	5680	3.58733
Ast_protoplasmic1	24	chemical synaptic transmission	0.000273012	GO:BP	GO:0007268	13	55	713	3.56382
Ast_protoplasmic1	25	anterograde trans-synaptic signaling	0.000273012	GO:BP	GO:0098916	13	55	713	3.56382
Ast_protoplasmic1	26	trans-synaptic signaling	0.000310462	GO:BP	GO:0099537	13	55	721	3.50799
Ast_protoplasmic1	27	synaptic signaling	0.000466259	GO:BP	GO:0099536	13	55	747	3.33137
Ast_protoplasmic1	28	integral component of presynaptic membrane	0.000477679	GO:CC	GO:0099056	5	55	70	3.32086
Ast_protoplasmic1	29	GABA-ergic synapse	0.000588924	GO:CC	GO:0098982	5	55	73	3.22994
Ast_protoplasmic1	30	cell periphery	0.000596237	GO:CC	GO:0071944	35	55	6178	3.22458
Ast_protoplasmic1	31	intrinsic component of presynaptic membrane	0.000872087	GO:CC	GO:0098889	5	55	79	3.05944
Ast_protoplasmic1	32	presynaptic membrane	0.00115444	GO:CC	GO:0042734	6	55	148	2.93763
Ast_protoplasmic1	33	intrinsic component of plasma membrane	0.00117451	GO:CC	GO:0031226	17	55	1725	2.93015
Ast_protoplasmic1	34	neuron projection	0.00161546	GO:CC	GO:0043005	15	55	1384	2.7917
Ast_protoplasmic1	35	plasma membrane bounded cell projection	0.00233014	GO:CC	GO:0120025	19	55	2234	2.63262
Ast_protoplasmic1	36	amino acid:sodium symporter activity	0.00313456	GO:MF	GO:0005283	3	51	14	2.50382
Ast_protoplasmic1	37	presynapse	0.00419015	GO:CC	GO:0098793	9	55	515	2.37777
Ast_protoplasmic1	38	postsynaptic membrane	0.0043988	GO:CC	GO:0045211	7	55	282	2.35667
Ast_protoplasmic1	39	system development	0.00512024	GO:BP	GO:0048731	32	55	5095	2.29071
Ast_protoplasmic1	40	amino acid:cation symporter activity	0.00697296	GO:MF	GO:0005416	3	51	18	2.15658
Ast_protoplasmic1	41	intrinsic component of membrane	0.00709845	GO:CC	GO:0031224	32	55	5873	2.14884
Ast_protoplasmic1	42	metal ion transmembrane transporter activity	0.00891577	GO:MF	GO:0046873	8	51	429	2.04984
Ast_protoplasmic1	43	regulation of cell communication	0.00905934	GO:BP	GO:0010646	26	55	3634	2.0429
Ast_protoplasmic1	44	synapse organization	0.0098232	GO:BP	GO:0050808	9	55	432	2.00775
Ast_protoplasmic1	45	modulation of chemical synaptic transmission	0.0101969	GO:BP	GO:0050804	9	55	434	1.99153
Ast_protoplasmic1	46	regulation of trans-synaptic signaling	0.0103883	GO:BP	GO:0099177	9	55	435	1.98346
Ast_protoplasmic1	47	regulation of signaling	0.01089	GO:BP	GO:0023051	26	55	3669	1.96297
Ast_protoplasmic1	48	anatomical structure development	0.0120041	GO:BP	GO:0048856	35	55	6164	1.92067
Ast_protoplasmic1	49	integral component of membrane	0.0124181	GO:CC	GO:0016021	31	55	5718	1.90595
Ast_protoplasmic1	50	integral component of plasma membrane	0.0124204	GO:CC	GO:0005887	15	55	1643	1.90586
Ast_protoplasmic1	51	cell development	0.0142142	GO:BP	GO:0048468	19	55	2122	1.84728
Ast_protoplasmic1	52	cell-cell signaling	0.0155783	GO:BP	GO:0007267	17	55	1735	1.80748
Ast_protoplasmic1	53	cell junction organization	0.0170867	GO:BP	GO:0034330	11	55	727	1.76734
Ast_protoplasmic1	54	multicellular organism development	0.0182212	GO:BP	GO:0007275	33	55	5670	1.73942
Ast_protoplasmic1	55	gamma-aminobutyric acid:sodium symporter activity	0.0200461	GO:MF	GO:0005332	2	51	4	1.69797
Ast_protoplasmic1	56	cell morphogenesis involved in neuron differentiation	0.0221139	GO:BP	GO:0048667	10	55	607	1.65534
Ast_protoplasmic1	57	organic acid:sodium symporter activity	0.0245654	GO:MF	GO:0005343	3	51	27	1.60968
Ast_protoplasmic1	58	axonal growth cone	0.0261917	GO:CC	GO:0044295	3	55	31	1.58184
Ast_protoplasmic1	59	developmental process	0.02721	GO:BP	GO:0032502	36	55	6678	1.56527
Ast_protoplasmic1	60	axon	0.0291115	GO:CC	GO:0030424	9	55	661	1.53594
Ast_protoplasmic1	61	cell differentiation	0.0301405	GO:BP	GO:0030154	28	55	4392	1.52085
Ast_protoplasmic1	62	regulation of localization	0.0311105	GO:BP	GO:0032879	22	55	2906	1.50709
Ast_protoplasmic1	63	regulation of plasma membrane bounded cell projection organization	0.0358847	GO:BP	GO:0120035	10	55	642	1.44509
Ast_protoplasmic1	64	cellular developmental process	0.0423845	GO:BP	GO:0048869	28	55	4468	1.37279
Ast_protoplasmic1	65	regulation of cell projection organization	0.0454809	GO:BP	GO:0031344	10	55	660	1.34217
Ast_protoplasmic1	66	somatodendritic compartment	0.0490887	GO:CC	GO:0036477	10	55	875	1.30902
